# Supplementary material for: Analysis of the early response to spinal cord injury identified a key role for mTORC1 signaling in the activation of neural stem progenitor cells
Source: PubMed Central journal article supplement (PMC8536777; doi:10.1038/s41536-021-00179-3), 2021-10-22
Supplement: 41536_2021_179_MOESM1_ESM.pdf [file 41536_2021_179_MOESM1_ESM.pdf]

1

## Supplementary Figures

2 **Supplementary Figure S1. Representation of module Eigengenes.**

3

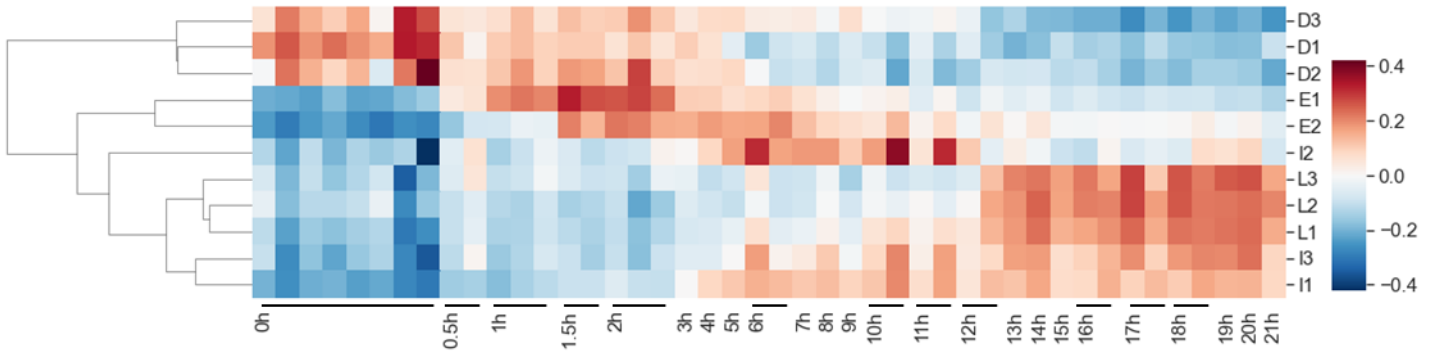

4

5 A dendrogram is used to cluster the module Eigengene for the 11 co-expression modules

6 identified in the Weighted Gene Coexpression Network Analysis. Module eigengenes are

7 also depicted using a heatmap for a better comprehension of their kinetics.

8

9

10

11

12

13

14

15

16

17

18

1 **Supplementary Figure S2. Key components of mTOR signaling pathway are early**  
 2 **regulated.**

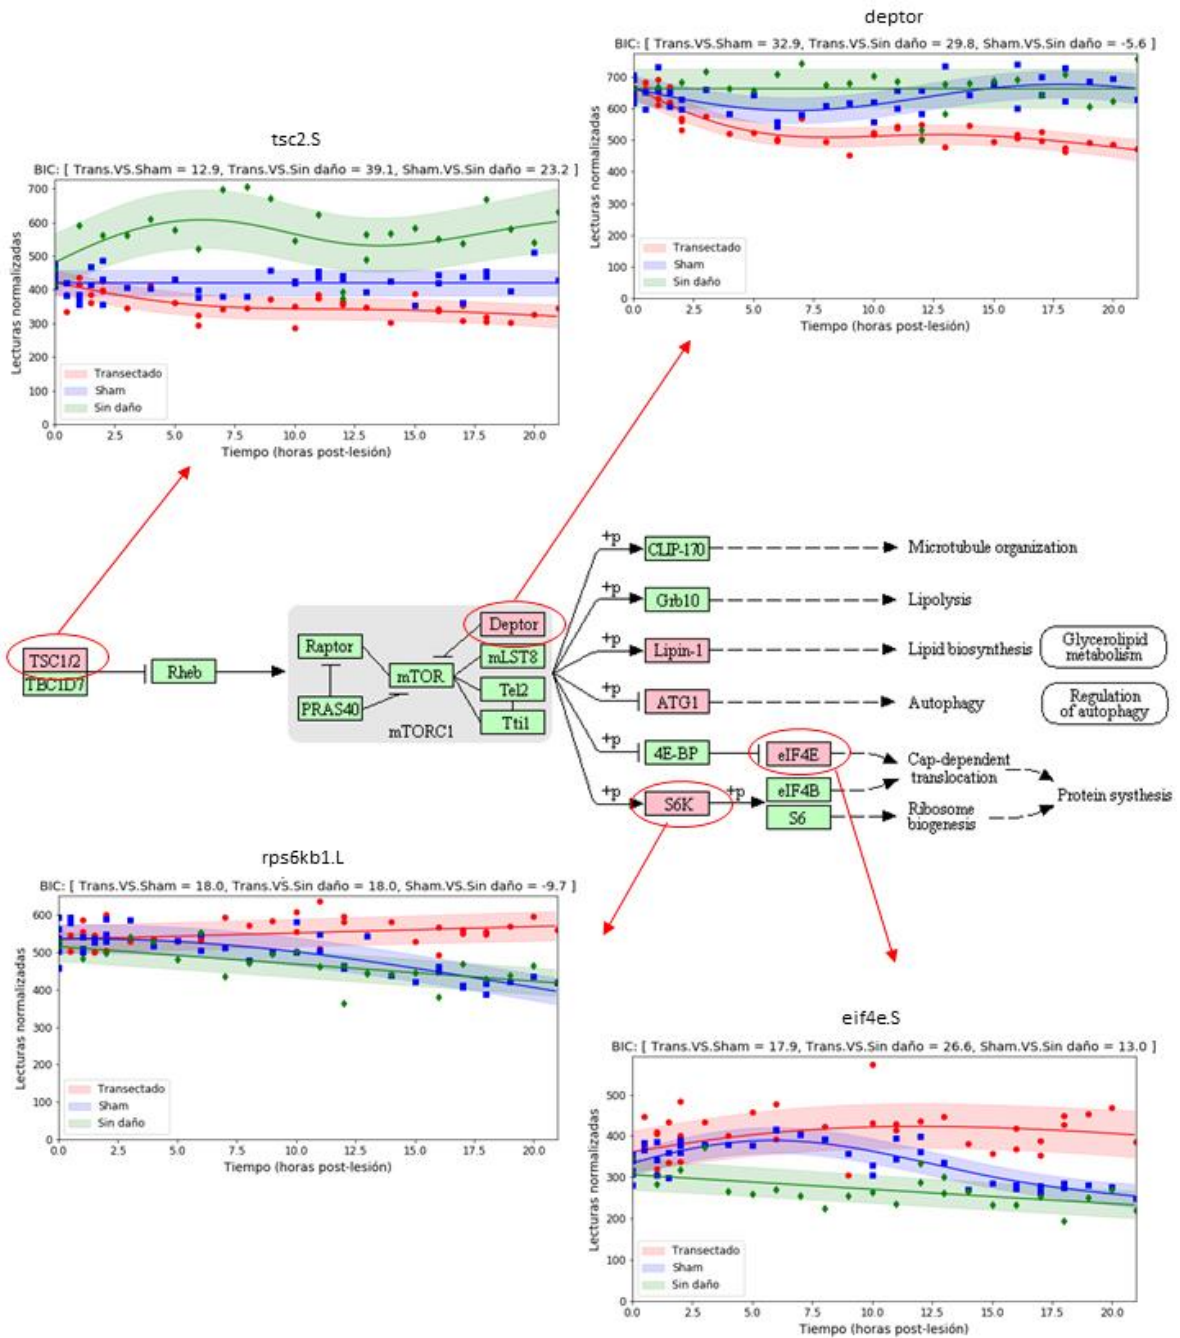

3  
 4  
 5

1 Several components of mTORC1 show early changes in gene expression after SCI. Between  
2 these genes we can observe a downregulated after damage in the gene expression profiles  
3 of *tsc2* and *deptor*, and an up-regulation in gene expression profiles of *rps6kb1* and *EIF4E*,  
4 associated to ribosome biogenesis and cap-dependent translation, respectively. Both  
5 suggest an activation of mTOR pathway with an apparent focus in protein translate  
6 regulation.

7

8

9

10

11

12

13

14

15

16

17

18

19

20

21

22

1 **Supplementary Figure S3. Early inhibition of mTOR signaling pathway using Rapamycin**  
 2 **impairs swimming recovery.**

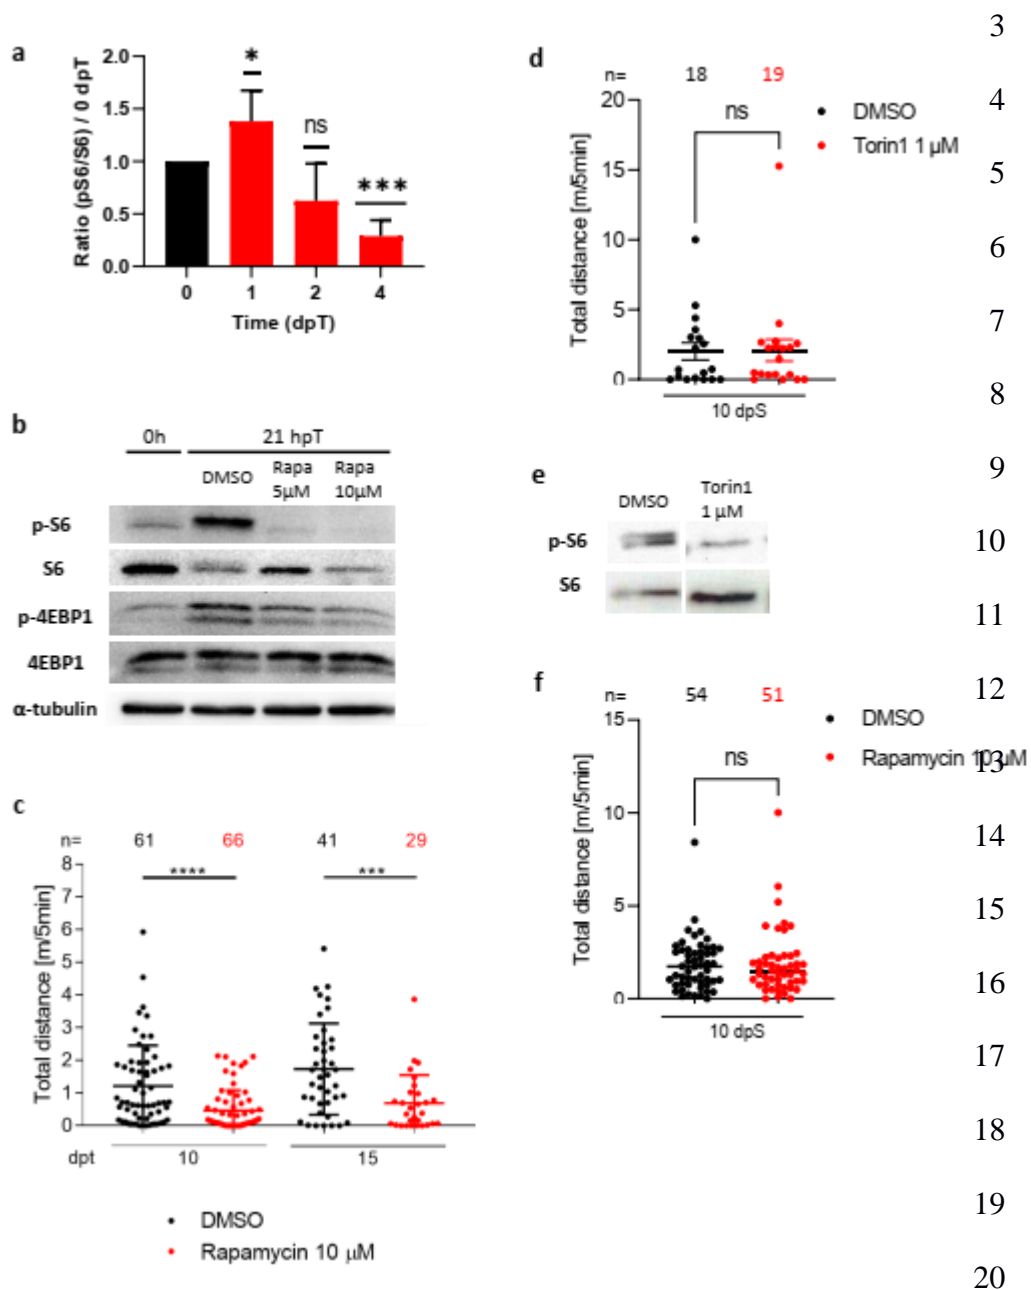

21 Similar results observed for swimming recovery after Torin1 treatment are reported with  
 22 Rapamycin treatment. **(a)** Quantification and statistical comparison for immunodetection  
 23 of ratio pS6/S6 using Western Blot. Data indicate the mean ± SEM, from five independent

1 experiments. \*P <0.05, \*\*\*P < 0.001, from a t-test comparing temporal point to control  
2 condition at 0 dpT. **(b)** Western Blot for S6, p-S6, 4EBP1 and p-4EBP1 in total protein  
3 extracts obtained from spinal cords at 0 hpT and 21 hpT, from *X. laevis* incubated with  
4 DMSO (vehicle), Rapamycin 5  $\mu$ M and 10  $\mu$ M, for evaluation of mTOR signaling pathway  
5 activation. **(c)** Dotplot of swimming distances, of animals treated with vehicle (black dots)  
6 and 10  $\mu$ M Rapamycin (red dots), measured at 10 and 15 dpT. Data indicate the mean  $\pm$   
7 SEM, from three independent experiments. \*\*\*P <0.001, \*\*\*\*P <0.0001, from a Mann  
8 Whitney U-test comparing Torin1 treated animals to control, at each time point. **(d)**  
9 Dotplot of swimming distances, of animals treated with vehicle (black dots) and Torin1 1  
10  $\mu$ M (red dots), measured at 10 dpS. Data indicate the mean  $\pm$  SEM, from one experiment.  
11 ns: not significant, from a Mann Whitney U-test comparing Torin1 treated animals to  
12 control, at each time point. **(e)** Western Blot for S6 and p-S6 in total protein extracts  
13 obtained from spinal cords at 1 dpS, from *X. laevis* incubated with DMSO (vehicle) and  
14 Torin1 1  $\mu$ M, for evaluation of mTOR signaling pathway inhibition in swimming recovery  
15 assay. All the blots included in this figure were derived from the same experiment and  
16 were processed in parallel. **(f)** Dotplot of swimming distances, of animals treated with  
17 vehicle (black dots) and 10  $\mu$ M Rapamycin (red dots), measured at 10 dpS. Data indicate  
18 the mean  $\pm$  SEM, from two independent experiments. ns: not significant, from a Mann  
19 Whitney U-test comparing Rapamycin treated animals to control, at each time point.

20

21

22

1 **Supplementary Figure S4. Early inhibition of mTOR increased the number of TUNEL<sup>+</sup>**  
2 **cells at 1 dpT.**

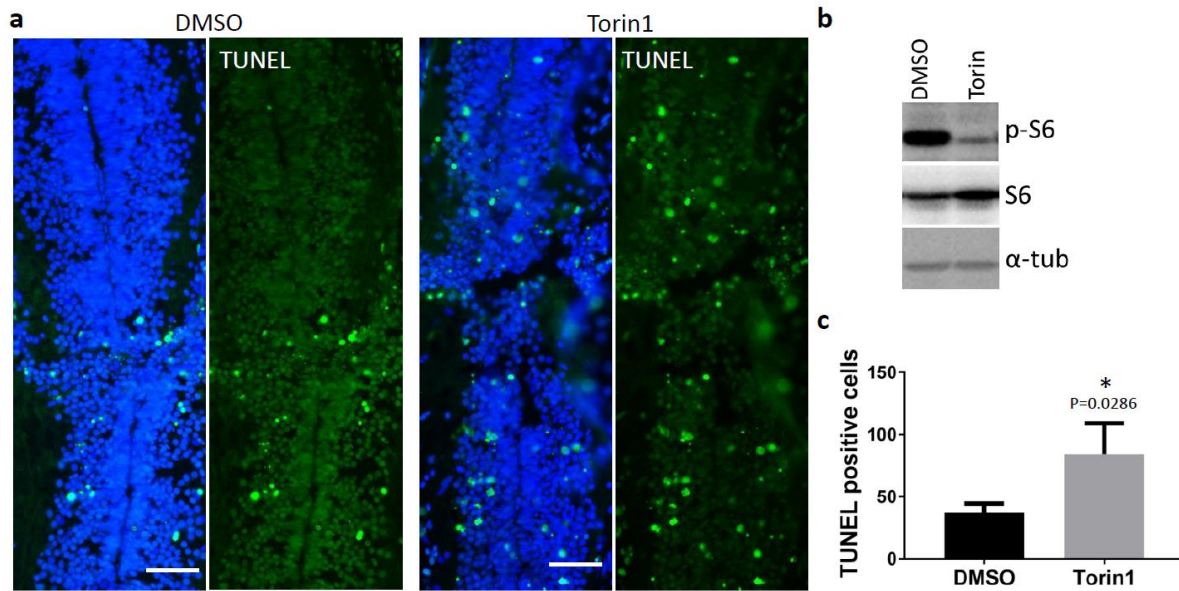

3 Effect of Torin1 on cell death analyzed by TUNEL. **(a)** Representative images of longitudinal  
4 cryosections of spinal cord at 1dpT, 300 μm rostral (upper part) and 300 μm caudal (lower  
5 part) to the injury site. TUNEL positive cells (green) and the nuclear staining Hoechst (blue)  
6 are shown. Scale bar = 50 μm. **(b)** Western Blot for p-S6, S6 and β-tubulin in total protein  
7 extracts obtained from spinal cords at 1 dpT, for evaluation of mTOR signaling pathway  
8 inhibition after Torin1 treatment. **(c)** Quantification of TUNEL positive cells in a defined  
9 spinal cord area (300 μm rostral and caudal to the injury site). Data indicate the mean ±  
10 SEM, from four independent experiments. \* P < 0.05, from a non-parametric Mann  
11 Whitney test comparing Torin1 to vehicle treatments. All the blots included in this figure  
12 were derived from the same experiment and were processed in parallel.

13

14

1 Figure S5. Summary of Differential Gene Expression and GO Enrichment analysis for  
 2 mTOR Inhibition mRNA-seq.

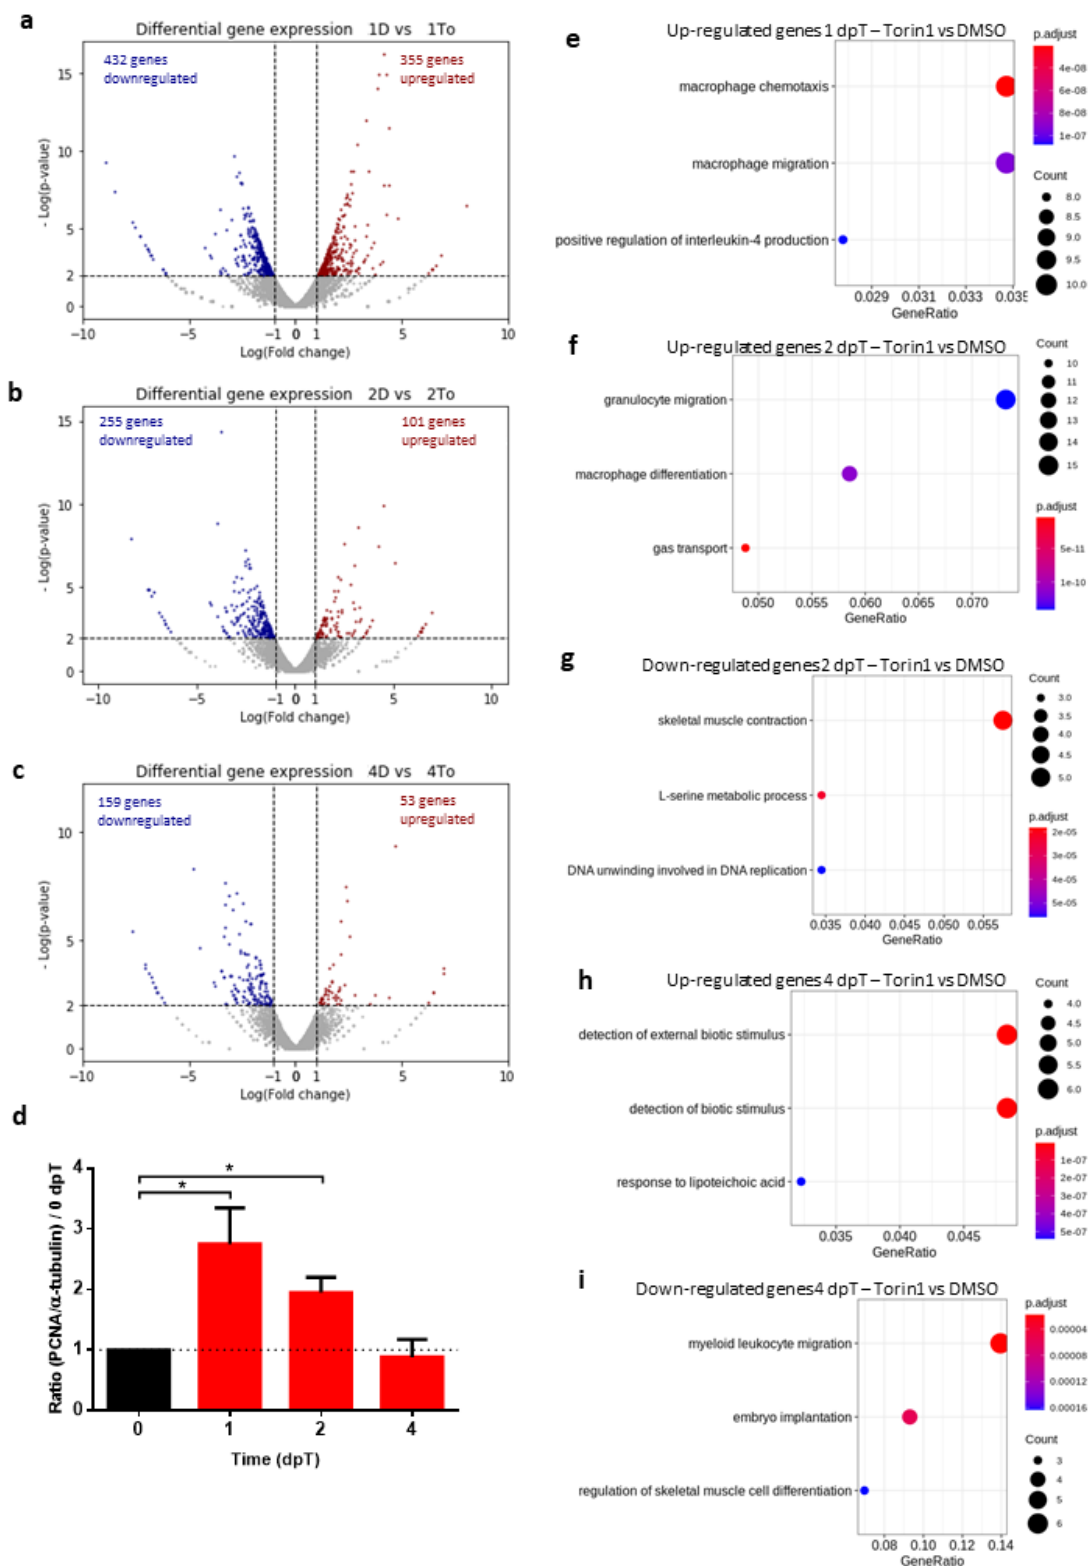

3

1 **(a-c)** Differential gene expression analysis of mTOR Inhibition mRNA-seq at 1 **(a)**, 2 **(b)** and  
2 4 **(c)** dpT are summarized in volcano plots. **(d)** Quantification and statistical comparison for  
3 immunodetection of PCNA using Western Blot. Data indicate the mean  $\pm$  SEM, from three  
4 independent experiments. \*P <0.05, from a t-test comparing temporal point to control  
5 condition at 0 dpT. **(e-i)** Three principal biological processes enriched are reported for  
6 upregulated genes at 1 **(e)**, 2 **(f)** and 4 **(h)** dpT and for downregulated genes at 2 **(g)** and 4  
7 **(i)** dpT.

8  
9  
10  
11  
12  
13  
14  
15  
16  
17  
18  
19  
20  
21  
22



1 **Supplementary Figure S6. Batch effect correction improve correlation between transected time-series.**

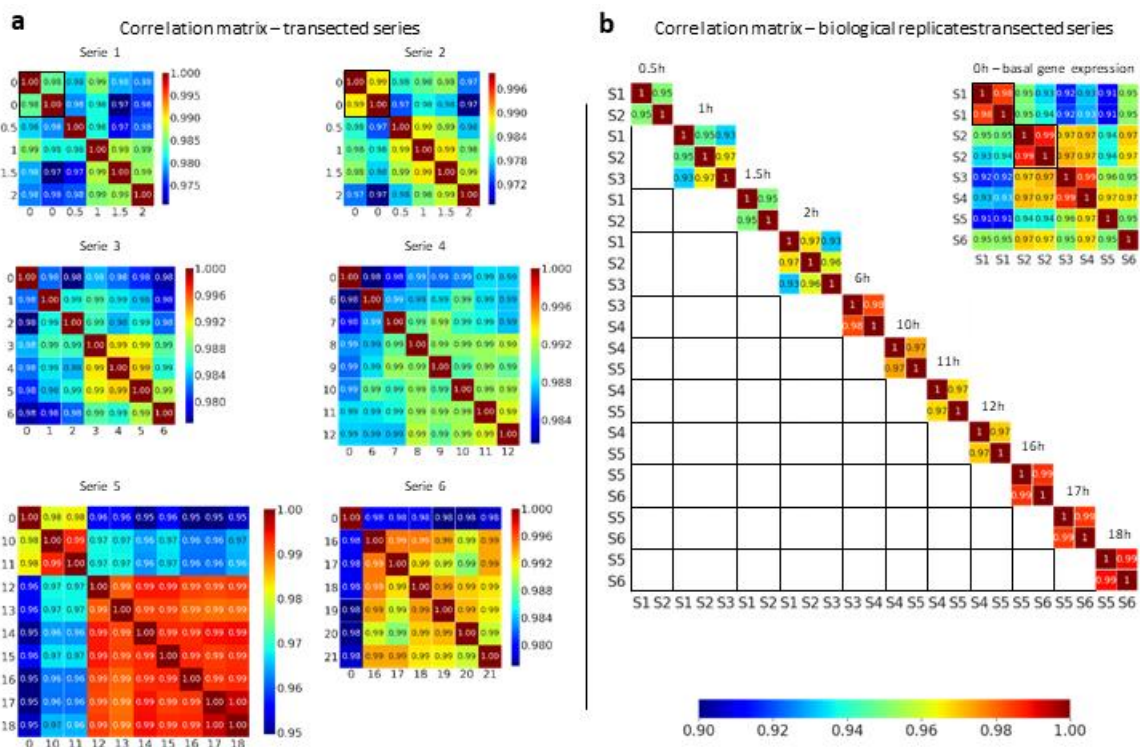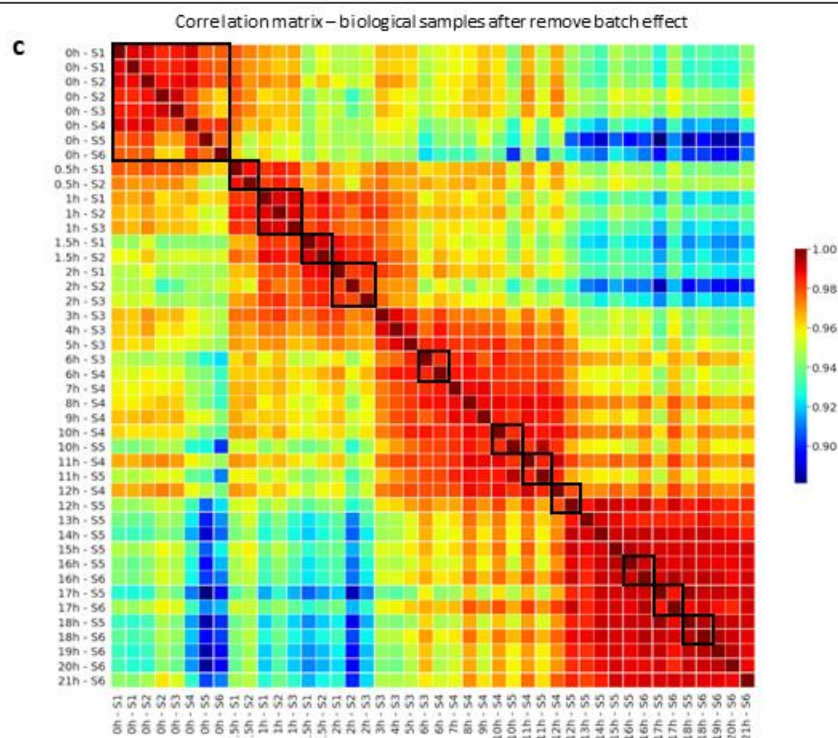

3

1 **(a)** Heatmap show Spearman correlation calculated between temporal points in each time-  
2 series before batch effect correction. Correlation coefficient was calculated among all  
3 consistently detected genes. Biological replicates at 0 hpT in S1 and S2 are highlighted a  
4 black square. Correlation coefficients are indicated in each square and also accord to color  
5 bar. **(b)** Heatmap comparing Spearman correlation for samples used as overlapping points  
6 between time-series in transected condition before batch effect correction. The inset  
7 depicts the correlation for 0 hpT time points included in all time-series. **(c)** Spearman  
8 correlation after remove batch effect is illustrated for transected samples. Coefficient  
9 correlation was calculated between all genes that showed an effect after transection (BIC >  
10 0). If overlapping point highlighted a black square are compared with B we can to observe  
11 an improving in coefficient correlation.

12

13

14

15

16

17

18

19

20

21

22

1 **Supplementary Figure S7. Batch effect correction improve correlation between sham**  
 2 **time-series.**

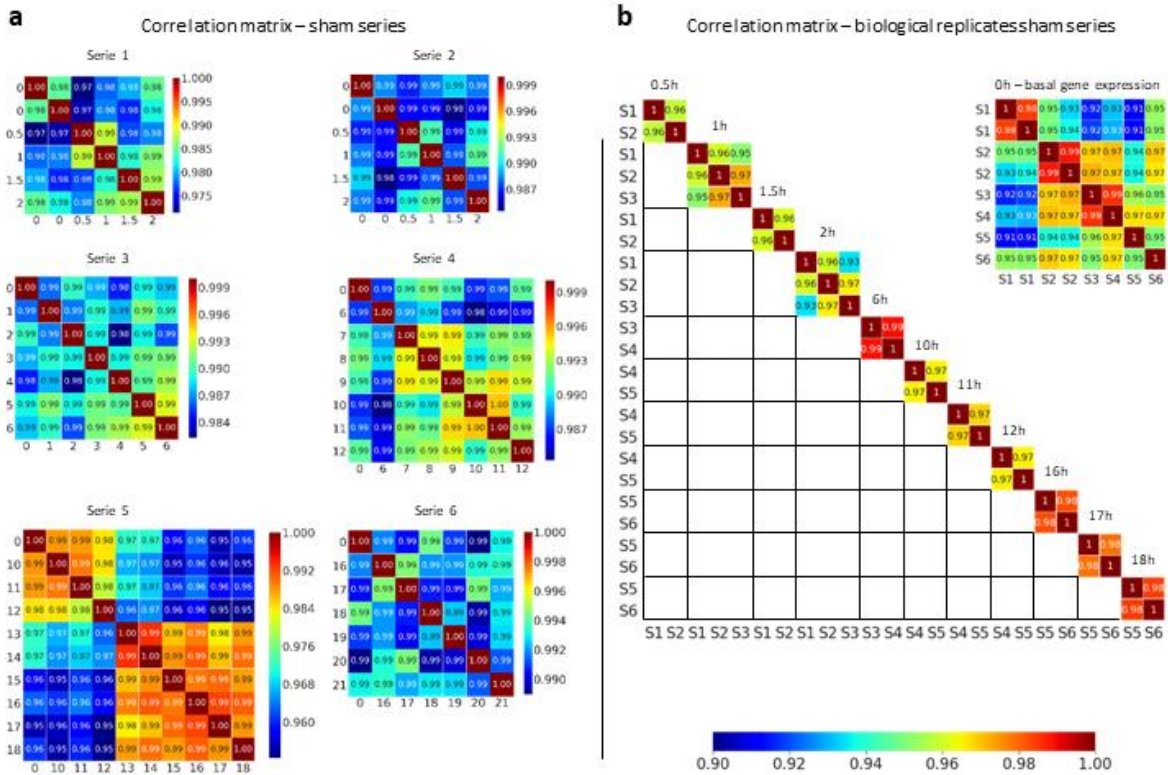

3 (a) Heatmap show Spearman correlation calculated between temporal points in each time-  
 4 series. Correlation coefficient was calculated among all consistently detected genes.  
 5 Biological replicates at 0 hpT in S1 and S2 are highlighted a black square. Correlation  
 6 coefficients are indicated in each square and also accord to color bar. (b) Heatmap  
 7 comparing Spearman correlation for samples used as overlapping points between time-  
 8 series in sham condition before batch effect correction. The inset depicts the correlation  
 9 for 0 hpT time points included in all time-series.

12

1 **Figure S8. Batch effect correction improve correlation between uninjured time-series.**

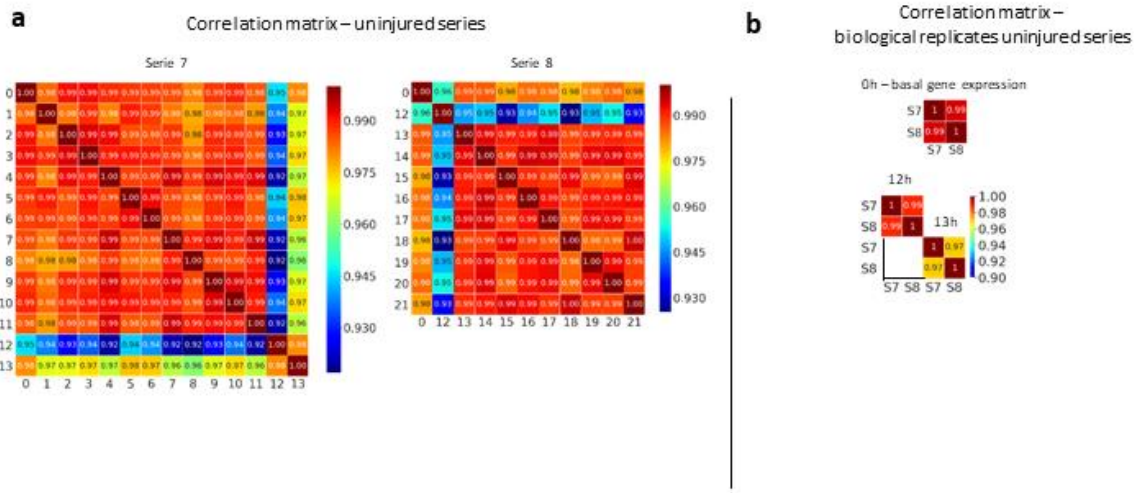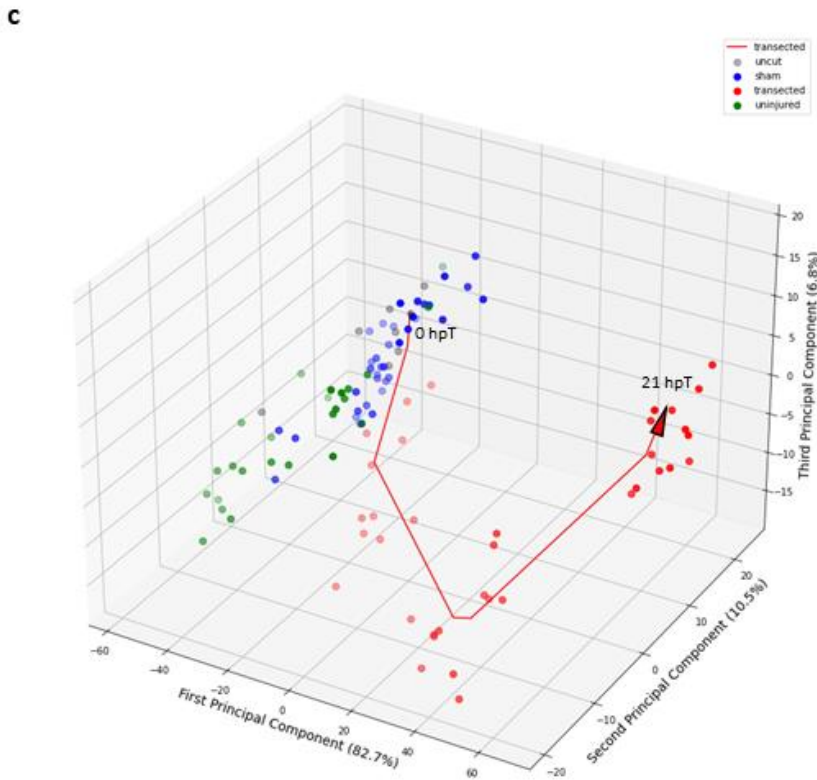

2

3

4

5

1 (a) Heatmap show Spearman correlation calculated between temporal points in each time-  
2 series before batch effect correction. Correlation coefficient was calculated among all  
3 consistently detected genes. Biological replicates at 0 hpT in S1 and S2 are highlighted a  
4 black square. Correlation coefficients are indicated in each square and also accord to color  
5 bar. (b) Heatmap comparing Spearman correlation for samples used as overlapping points  
6 between time-series in uninjured condition before batch effect correction. The inset  
7 depicts the correlation for 0 hpT time points included in all time-series. (c) 3D PCA Plot  
8 comparing samples of transected (red), sham (blue) and uninjured (green) conditions,  
9 including uncut samples used as 0 hpT for transected and sham conditions (grey). PCA was  
10 performed over the data of all consistently detected genes. Red line represents a B-Spline  
11 interpolation for transected data according to sampling time. Intensity color of dots for  
12 transected, sham and uninjured conditions is increasing with sampling time.

13

14

15

16

17

18

19

20

21

- 1 **Supplementary Figure S9. Individual gene expression profiles are affected by batch effect**
- 2 **between time-series.**

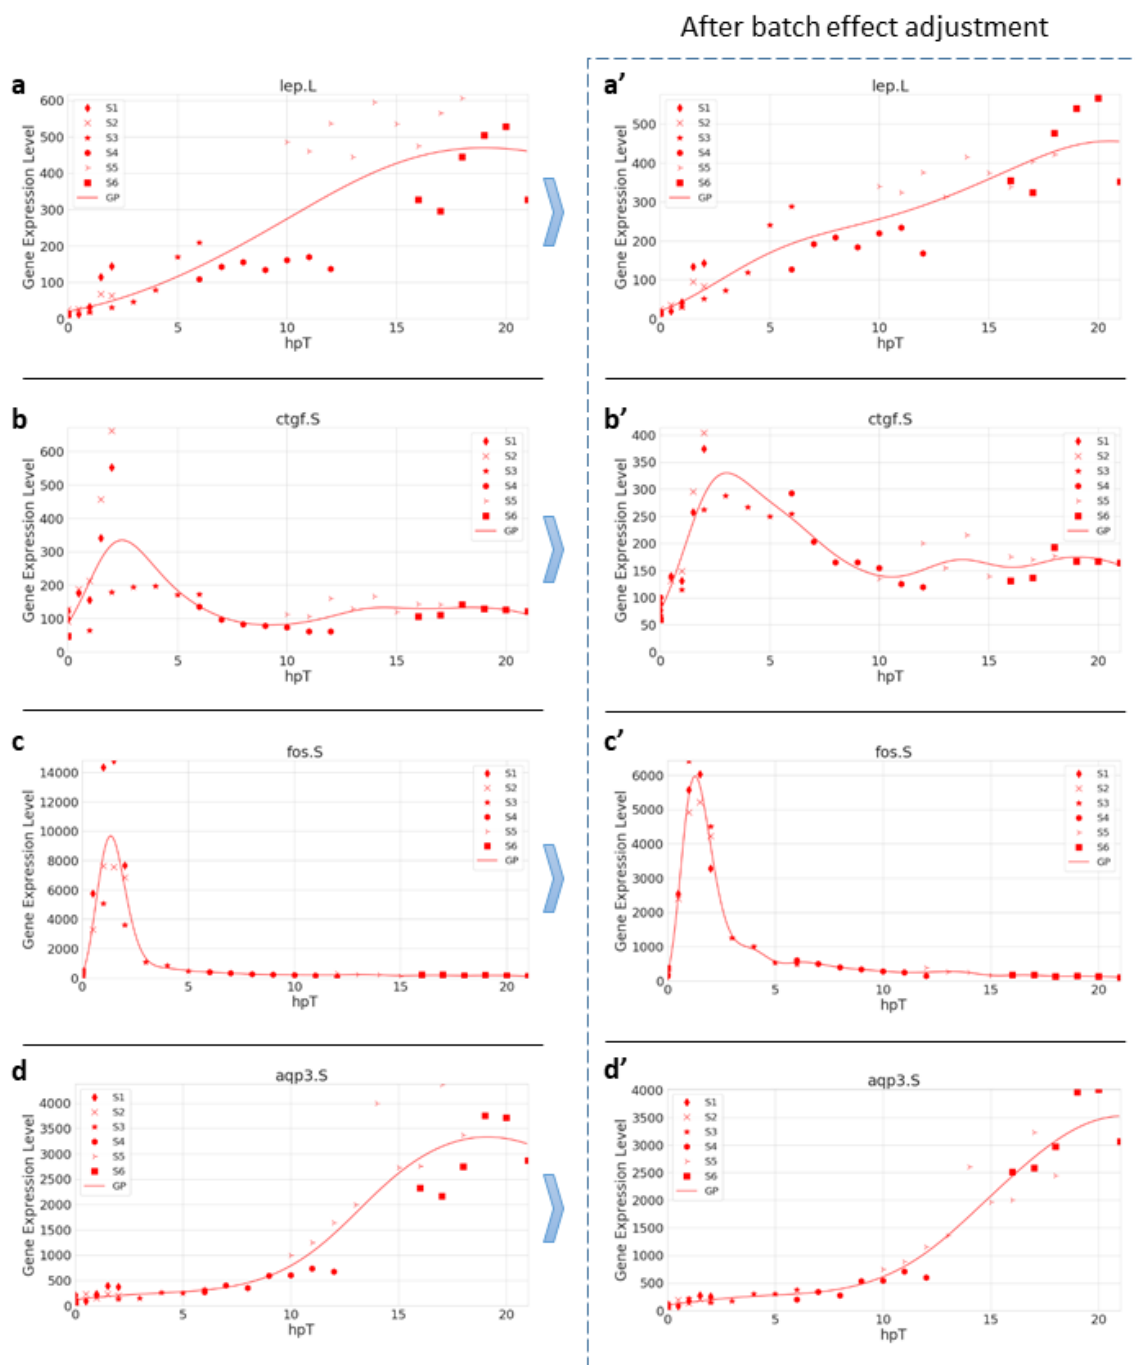

- 3
- 4

1 A poor overlapping is observed for some genes when gene expression profiles are  
2 constructed after merging all time-series. Graph in panels **a,b,c** and **d** represent four  
3 examples of genes affected by batch effect and **a', b',c'** and **d'** depicts the corresponding  
4 profiles after batch effect adjustment using the Combat function of the SVA package. Not  
5 all genes are affected equally by batch effects which could be observed when **d** is  
6 compared with **a, b** and **c**.

7  
8  
9  
10  
11  
12  
13  
14  
15  
16  
17  
18  
19  
20  
21  
22  
23

**Supplementary Table S1 - Quality Score and Alignment Rate per Library**

| Serie  | Sample |         | # Reads    | Size | Mean Q-Score | % Aligned Reads |
|--------|--------|---------|------------|------|--------------|-----------------|
| S1,S1' | -      | 0h (R1) | 19,864,452 | 50   | 37.8         | 70.4%           |
| S1,S1' | -      | 0h (R2) | 17,001,050 | 50   | 37.8         | 70.1%           |
| S1'    | SHAM   | 0.5h    | 16,066,080 | 50   | 37.8         | 69.6%           |
| S1     | TRANS  | 0.5h    | 18,222,957 | 50   | 37.7         | 68.2%           |
| S1'    | SHAM   | 1h      | 18,310,893 | 50   | 37.7         | 69.3%           |
| S1     | TRANS  | 1h      | 17,651,652 | 50   | 37.7         | 70.3%           |
| S1'    | SHAM   | 1.5h    | 14,699,064 | 50   | 37.8         | 68.3%           |
| S1     | TRANS  | 1.5h    | 16,044,732 | 50   | 38.0         | 72.0%           |
| S1'    | SHAM   | 2h      | 16,197,643 | 50   | 37.8         | 69.9%           |
| S1     | TRANS  | 2h      | 16,573,749 | 50   | 37.8         | 72.0%           |
| S2,S2' | -      | 0h (R1) | 19,392,167 | 50   | 37.8         | 70.0%           |
| S2,S2' | -      | 0h (R2) | 18,882,037 | 50   | 37.9         | 70.3%           |
| S2'    | SHAM   | 0.5h    | 15,311,616 | 50   | 37.8         | 72.1%           |
| S2     | TRANS  | 0.5h    | 16,843,042 | 50   | 37.8         | 73.5%           |
| S2'    | SHAM   | 1h      | 19,569,871 | 50   | 37.7         | 71.9%           |
| S2     | TRANS  | 1h      | 17,802,141 | 50   | 37.7         | 70.6%           |
| S2'    | SHAM   | 1.5h    | 20,120,753 | 50   | 37.8         | 70.0%           |
| S2     | TRANS  | 1.5h    | 18,352,733 | 50   | 37.8         | 72.7%           |
| S2'    | SHAM   | 2h      | 20,769,534 | 50   | 37.8         | 73.3%           |
| S2     | TRANS  | 2h      | 15,071,279 | 50   | 37.7         | 71.4%           |
| S3,S3' | -      | 0h      | 19,837,973 | 51   | 37.6         | 70.3%           |
| S3'    | SHAM   | 1h      | 27,537,214 | 51   | 36.5         | 70.8%           |
| S3     | TRANS  | 1h      | 16,193,233 | 51   | 37.6         | 69.1%           |
| S3'    | SHAM   | 2h      | 18,092,933 | 51   | 37.6         | 70.6%           |
| S3     | TRANS  | 2h      | 21,976,557 | 51   | 37.8         | 73.8%           |
| S3'    | SHAM   | 3h      | 14,747,972 | 51   | 37.9         | 71.8%           |
| S3     | TRANS  | 3h      | 36,386,417 | 51   | 36.6         | 70.0%           |
| S3'    | SHAM   | 4h      | 30,142,561 | 51   | 37.7         | 70.4%           |
| S3     | TRANS  | 4h      | 23,580,012 | 51   | 37.7         | 71.5%           |
| S3'    | SHAM   | 5h      | 51,862,469 | 51   | 36.5         | 70.9%           |
| S3     | TRANS  | 5h      | 42,464,794 | 51   | 37.7         | 71.5%           |
| S3'    | SHAM   | 6h      | 26,593,936 | 51   | 38.0         | 71.6%           |
| S3     | TRANS  | 6h      | 30,639,623 | 51   | 37.7         | 72.1%           |
| S4,S4' | -      | 0h      | 34,293,485 | 51   | 37.7         | 71.2%           |
| S4'    | SHAM   | 6h      | 25,559,236 | 51   | 38.0         | 68.6%           |
| S4     | TRANS  | 6h      | 21,267,923 | 51   | 37.8         | 71.3%           |
| S4'    | SHAM   | 7h      | 23,190,895 | 51   | 37.7         | 72.4%           |
| S4     | TRANS  | 7h      | 19,264,300 | 51   | 37.8         | 71.3%           |
| S4'    | SHAM   | 8h      | 23,717,921 | 51   | 37.8         | 71.5%           |
| S4     | TRANS  | 8h      | 23,346,692 | 51   | 38.0         | 72.5%           |
| S4'    | SHAM   | 9h      | 50,305,092 | 51   | 36.5         | 71.8%           |



|        |       |     |             |    |      |       |
|--------|-------|-----|-------------|----|------|-------|
| S4     | TRANS | 9h  | 21,458,987  | 51 | 37.6 | 71.6% |
| S4'    | SHAM  | 10h | 28,627,224  | 51 | 37.7 | 71.3% |
| S4     | TRANS | 10h | 31,972,279  | 51 | 37.8 | 71.1% |
| S4'    | SHAM  | 11h | 49,683,113  | 51 | 36.6 | 72.5% |
| S4     | TRANS | 11h | 19,180,383  | 51 | 37.8 | 72.8% |
| S4'    | SHAM  | 12h | 24,306,102  | 51 | 37.8 | 70.8% |
| S4     | TRANS | 12h | 17,132,651  | 51 | 37.8 | 72.8% |
| S5,S5' | -     | 0h  | 26,334,967  | 51 | 37.4 | 69.5% |
| S5'    | SHAM  | 10h | 26,348,795  | 51 | 37.3 | 65.8% |
| S5     | TRANS | 10h | 25,689,539  | 51 | 37.4 | 69.6% |
| S5'    | SHAM  | 11h | 19,493,335  | 51 | 37.5 | 67.0% |
| S5     | TRANS | 11h | 31,742,604  | 51 | 37.3 | 68.0% |
| S5'    | SHAM  | 12h | 25,222,408  | 51 | 37.2 | 67.9% |
| S5     | TRANS | 12h | 35,741,701  | 51 | 37.3 | 70.4% |
| S5'    | SHAM  | 13h | 28,932,056  | 51 | 37.4 | 71.1% |
| S5     | TRANS | 13h | 32,919,536  | 51 | 37.4 | 73.9% |
| S5'    | SHAM  | 14h | 27,499,234  | 51 | 37.3 | 71.8% |
| S5     | TRANS | 14h | 30,614,502  | 51 | 37.4 | 70.2% |
| S5'    | SHAM  | 15h | 38,224,480  | 51 | 37.2 | 73.0% |
| S5     | TRANS | 15h | 37,218,330  | 51 | 37.1 | 70.2% |
| S5'    | SHAM  | 16h | 26,539,788  | 51 | 37.1 | 70.8% |
| S5     | TRANS | 16h | 21,079,571  | 51 | 37.4 | 70.4% |
| S5'    | SHAM  | 17h | 30,194,620  | 51 | 37.1 | 67.2% |
| S5     | TRANS | 17h | 39,159,329  | 51 | 37.0 | 70.9% |
| S5'    | SHAM  | 18h | 27,922,262  | 51 | 37.1 | 68.0% |
| S5     | TRANS | 18h | 108,006,595 | 51 | 36.7 | 71.6% |
| S6,S6' | -     | 0h  | 29,889,602  | 51 | 37.3 | 69.6% |
| S6'    | SHAM  | 16h | 43,043,267  | 51 | 35.0 | 64.3% |
| S6     | TRANS | 16h | 52,225,695  | 51 | 35.1 | 64.7% |
| S6'    | SHAM  | 17h | 41,853,129  | 51 | 34.7 | 61.4% |
| S6     | TRANS | 17h | 29,163,192  | 51 | 37.4 | 65.2% |
| S6'    | SHAM  | 18h | 32,193,154  | 51 | 37.1 | 66.7% |
| S6     | TRANS | 18h | 30,364,293  | 51 | 37.2 | 68.5% |
| S6'    | SHAM  | 19h | 23,766,288  | 51 | 37.4 | 67.8% |
| S6     | TRANS | 19h | 27,048,993  | 51 | 37.3 | 67.9% |
| S6'    | SHAM  | 20h | 27,592,826  | 51 | 37.1 | 63.2% |
| S6     | TRANS | 20h | 23,443,149  | 51 | 37.3 | 67.9% |
| S6'    | SHAM  | 21h | 25,636,766  | 51 | 37.4 | 66.5% |
| S6     | TRANS | 21h | 31,009,574  | 51 | 37.5 | 67.3% |
| S7     | UNINJ | 0h  | 32,204,037  | 51 | 36.7 | 66.2% |
| S7     | UNINJ | 1h  | 30,573,605  | 51 | 36.9 | 64.6% |
| S7     | UNINJ | 2h  | 30,944,504  | 51 | 37.3 | 69.1% |
| S7     | UNINJ | 3h  | 30,922,773  | 51 | 37.4 | 69.6% |

|                 |       |            |            |     |      |       |
|-----------------|-------|------------|------------|-----|------|-------|
| S7              | UNINJ | 4h         | 34,844,190 | 51  | 37.1 | 66.9% |
| S7              | UNINJ | 5h         | 27,674,143 | 51  | 37.0 | 67.2% |
| S7              | UNINJ | 6h         | 27,516,635 | 51  | 36.7 | 65.9% |
| S7              | UNINJ | 7h         | 31,055,511 | 51  | 37.3 | 65.2% |
| S7              | UNINJ | 8h         | 21,801,494 | 51  | 37.1 | 64.8% |
| S7              | UNINJ | 9h         | 21,228,743 | 51  | 36.7 | 64.6% |
| S7              | UNINJ | 10h        | 28,650,110 | 51  | 37.1 | 69.0% |
| S7              | UNINJ | 11h        | 36,070,048 | 51  | 36.8 | 64.3% |
| S7              | UNINJ | 12h        | 23,071,050 | 51  | 36.5 | 66.6% |
| S7              | UNINJ | 13h        | 28,002,613 | 51  | 36.9 | 66.1% |
| S8              | UNINJ | 0h         | 26,931,801 | 51  | 37.0 | 66.9% |
| S8              | UNINJ | 12h        | 26,482,971 | 51  | 36.7 | 69.5% |
| S8              | UNINJ | 13h        | 33,717,355 | 51  | 37.0 | 66.2% |
| S8              | UNINJ | 14h        | 31,598,901 | 51  | 37.0 | 68.1% |
| S8              | UNINJ | 15h        | 28,371,384 | 51  | 37.0 | 65.4% |
| S8              | UNINJ | 16h        | 33,321,746 | 51  | 37.0 | 68.4% |
| S8              | UNINJ | 17h        | 28,993,749 | 51  | 37.3 | 70.3% |
| S8              | UNINJ | 18h        | 34,612,737 | 51  | 37.0 | 64.6% |
| S8              | UNINJ | 19h        | 32,463,905 | 51  | 36.9 | 66.9% |
| S8              | UNINJ | 20h        | 28,548,009 | 51  | 37.2 | 68.4% |
| S8              | UNINJ | 21h        | 45,561,395 | 51  | 37.0 | 65.6% |
| mTOR Inhibition | TRANS | 24h TORIN1 | 35,596,842 | 150 | 37.9 | 59.5% |
| mTOR Inhibition | TRANS | 24h DMSO   | 48,243,669 | 150 | 37.9 | 59.0% |
| mTOR Inhibition | TRANS | 48h TORIN1 | 48,908,365 | 150 | 37.9 | 59.2% |
| mTOR Inhibition | TRANS | 48h DMSO   | 50,854,436 | 150 | 37.9 | 60.5% |
| mTOR Inhibition | TRANS | 96h TORIN1 | 53,050,294 | 150 | 37.9 | 58.0% |
| mTOR Inhibition | TRANS | 96h DMSO   | 54,484,119 | 150 | 37.8 | 59.7% |

1  
2  
3  
4  
5  
6  
7  
8  
9

**Supplementary Table S2 - Differential gene expression and Clustering analysis of time-series mRNA-seq**

| Module | Gene ID              | Gene Symbol         | Blastp Human | Transected VS Sham | Transected VS Uninjured | Sham VS Uninjured | MM   | p.MM     |
|--------|----------------------|---------------------|--------------|--------------------|-------------------------|-------------------|------|----------|
| E1     | mi Xelaev18043661m.g | socs3.L             | SOCS3        | 68.44              | 47.52                   | -15.26            | 0.84 | 6.07E-13 |
| E1     | mi Xelaev18034372m.g | ch25h.L             | CH25H        | 64.36              | 37.66                   | -3.95             | 0.84 | 1.63E-12 |
| E1     | mi Xelaev18034007m.g | myc.S               | MYC          | 58.10              | 53.01                   | 10.02             | 0.76 | 1.72E-09 |
| E1     | mi Xelaev18025150m.g | jun.S               | JUN          | 53.19              | 46.62                   | -6.58             | 0.90 | 5.13E-17 |
| E1     | mi Xelaev18023019m.g | jun.L               | JUN          | 52.51              | 28.30                   | -5.25             | 0.85 | 2.17E-13 |
| E1     | mi Xelaev18039459m.g | fos.L               | FOS          | 45.79              | 34.14                   | -0.22             | 0.92 | 1.77E-18 |
| E1     | mi Xelaev18046376m.g | socs3.S             | SOCS3        | 44.06              | 16.91                   | -10.85            | 0.92 | 1.71E-18 |
| E1     | mi Xelaev18047800m.g | rasd1.S             | RASD1        | 43.37              | 25.53                   | -15.97            | 0.95 | 9.09E-23 |
| E1     | mi Xelaev18004909m.g | egr4.L              | EGR4         | 43.36              | 38.43                   | 6.28              | 0.95 | 2.04E-22 |
| E1     | mi Xelaev18041369m.g | fos.S               | FOS          | 38.15              | 24.38                   | -16.95            | 0.89 | 9.04E-16 |
| E1     | mi Xelaev18043066m.g | coq10b.L            | COQ10B       | 36.52              | 31.72                   | -11.23            | 0.90 | 5.89E-17 |
| E1     | mi Xelaev18019082m.g | junb.L              | JUNB         | 35.20              | 22.61                   | -10.66            | 0.96 | 1.46E-25 |
| E1     | mi Xelaev18019097m.g | ier2.L              | N/B          | 33.79              | 36.50                   | -4.06             | 0.94 | 9.80E-21 |
| E1     | mi Xelaev18014874m.g | btg2.S              | BTG2         | 30.35              | 12.91                   | -16.70            | 0.85 | 4.39E-13 |
| E1     | mi Xelaev18027111m.g | gja1.L              | GJA1         | 27.98              | 13.08                   | -8.19             | 0.71 | 6.81E-08 |
| E1     | mi Xelaev18039067m.g | loc100490871-like.L | FOS          | 27.64              | 24.96                   | -13.14            | 0.90 | 1.48E-16 |
| E1     | mi Xelaev18019817m.g | timp3.S             | TIMP3        | 25.19              | 21.42                   | -15.74            | 0.81 | 2.45E-11 |
| E1     | mi Xelaev18000800m.g | junb.S              | JUNB         | 25.01              | 15.11                   | -9.89             | 0.96 | 1.46E-24 |
| E1     | mi Xelaev18042368m.g | loc100490871-like.S | FOS          | 24.09              | 29.24                   | -8.08             | 0.91 | 8.78E-18 |
| E1     | mi Xelaev18028547m.g | loc101733171.S      | HIST1H2BJ    | 23.22              | 18.00                   | -11.27            | 0.87 | 1.11E-14 |
| E1     | mi Xelaev18028696m.g | atf3.S              | ATF3         | 22.09              | 26.64                   | -12.80            | 0.94 | 1.06E-20 |
| E1     | mi Xelaev18032361m.g | myc.L               | MYC          | 21.89              | 29.95                   | 3.72              | 0.76 | 2.03E-09 |
| E1     | mi Xelaev18039068m.g | Xelaev18039068m.g   | N/B          | 20.48              | 14.14                   | -13.00            | 0.90 | 7.95E-17 |
| E1     | mi Xelaev18039213m.g | ctgfl.L             | WISP1        | 19.35              | 24.48                   | -2.90             | 0.75 | 4.72E-   |

|    |                      |                     |           |       |       |        |      |          |
|----|----------------------|---------------------|-----------|-------|-------|--------|------|----------|
|    |                      |                     |           |       |       |        |      | 09       |
| E1 | mi Xelaev18027531m.g | hes1.L              | HES1      | 18.85 | 13.28 | -11.04 | 0.75 | 5.68E-09 |
| E1 | mi Xelaev18012500m.g | fhl3.L              | FHL3      | 18.83 | 25.92 | -4.12  | 0.71 | 5.47E-08 |
| E1 | mi Xelaev18023910m.g | bhlhe40.L           | BHLHE40   | 18.72 | 29.58 | -8.49  | 0.94 | 1.27E-21 |
| E1 | mi Xelaev18043375m.g | itgb3.L             | N/B       | 17.52 | 16.23 | -12.87 | 0.78 | 4.83E-10 |
| E1 | mi Xelaev18005276m.g | rasl11b.L           | RASL11B   | 17.47 | 12.01 | -0.93  | 0.86 | 4.98E-14 |
| E1 | mi Xelaev18023622m.g | ptgs2.L             | PTGS2     | 17.41 | 13.78 | -6.71  | 0.86 | 6.02E-14 |
| E1 | mi Xelaev18033922m.g | klf10.S             | KLF10     | 17.19 | 31.67 | -5.35  | 0.79 | 1.19E-10 |
| E1 | mi Xelaev18032432m.g | arc.L               | ARC       | 17.03 | 15.28 | -21.60 | 0.97 | 6.03E-28 |
| E1 | mi Xelaev18032771m.g | gjc2.S              | GJC1      | 16.89 | 42.07 | 14.79  | 0.75 | 4.38E-09 |
| E1 | mi Xelaev18018776m.g | tnfrsf10b.L         | TNFRSF10B | 16.29 | 31.36 | 1.17   | 0.91 | 4.95E-18 |
| E1 | mi Xelaev18027287m.g | srsf12.L            | SRSF12    | 16.15 | 21.17 | -10.66 | 0.63 | 5.32E-06 |
| E1 | mi Xelaev18030118m.g | rhob.S              | RHOB      | 15.57 | 40.54 | 8.35   | 0.81 | 3.45E-11 |
| E1 | mi Xelaev18005131m.g | hs3st1.L            | HS3ST1    | 15.49 | 16.16 | -2.81  | 0.87 | 2.70E-14 |
| E1 | mi Xelaev18041423m.g | loc100497513-like.S | N/B       | 15.42 | 13.79 | -6.91  | 0.90 | 4.78E-17 |
| E1 | mi Xelaev18017353m.g | egr1.L              | EGR1      | 15.22 | 11.10 | -20.02 | 0.90 | 2.09E-16 |
| E1 | mi Xelaev18036625m.g | dusp5.S             | DUSP5     | 15.20 | 14.70 | -23.09 | 0.83 | 3.25E-12 |
| E1 | mi Xelaev18008744m.g | egr4.S              | EGR4      | 14.92 | 21.00 | 0.64   | 0.93 | 6.18E-20 |
| E1 | mi Xelaev18005051m.g | tnip2.L             | TNIP2     | 13.99 | 23.94 | -8.85  | 0.94 | 5.65E-21 |
| E1 | mi Xelaev18021648m.g | Xelaev18021648m.g   | PHLDA2    | 13.34 | 15.40 | -8.36  | 0.70 | 9.88E-08 |
| E1 | mi Xelaev18024546m.g | adm.S               | ADM       | 12.56 | 28.36 | 6.36   | 0.83 | 1.86E-12 |
| E1 | mi Xelaev18017457m.g | dusp6.L             | DUSP6     | 11.71 | 32.59 | 4.79   | 0.92 | 6.53E-19 |
| E1 | mi Xelaev18011436m.g | ets2.L              | ETS2      | 10.85 | 22.97 | -3.92  | 0.93 | 2.89E-20 |
| E1 | mi Xelaev18005395m.g | vegfc.L             | VEGFC     | 10.79 | 16.54 | -6.84  | 0.66 | 1.19E-06 |
| E1 | mi Xelaev18038173m.g | loc101731931.L      | CYR61     | 10.55 | 18.97 | -5.40  | 0.78 | 5.44E-10 |
| E1 | mi Xelaev18039957m.g | nfkbia.L            | NFKBIA    | 10.41 | 12.05 | -10.14 | 0.86 | 1.26E-13 |

|    |                      |                   |           |       |       |        |      |          |
|----|----------------------|-------------------|-----------|-------|-------|--------|------|----------|
| E2 | mi Xelaev18022274m.g | fosl1.L           | FOSL1     | 71.33 | 58.45 | -9.21  | 0.97 | 1.02E-28 |
| E2 | mi Xelaev18001506m.g | tnfrsf12a.L       | TNFRSF12A | 67.76 | 45.69 | -10.87 | 0.89 | 1.05E-15 |
| E2 | mi Xelaev18024674m.g | Xelaev18024674m.g | PHLDA2    | 62.93 | 55.68 | -7.65  | 0.90 | 1.11E-16 |
| E2 | mi Xelaev18026209m.g | atf3.L            | ATF3      | 61.48 | 61.45 | -8.89  | 0.95 | 9.28E-23 |
| E2 | mi Xelaev18009501m.g | Xelaev18009501m.g | N/B       | 60.20 | 34.67 | -8.68  | 0.88 | 5.62E-15 |
| E2 | mi Xelaev18030082m.g | odc1.S            | ODC1      | 53.09 | 60.02 | 19.98  | 0.87 | 2.08E-14 |
| E2 | mi Xelaev18040374m.g | ecm1.L            | ECM1      | 52.43 | 37.56 | -11.52 | 0.85 | 1.54E-13 |
| E2 | mi Xelaev18011954m.g | g0s2.L            | G0S2      | 52.13 | 59.19 | 19.21  | 0.78 | 3.71E-10 |
| E2 | mi Xelaev18007407m.g | lif.L             | LIF       | 51.72 | 36.18 | -11.83 | 0.79 | 2.28E-10 |
| E2 | mi Xelaev18023601m.g | selp.L            | SELP      | 51.39 | 31.73 | -8.19  | 0.84 | 1.68E-12 |
| E2 | mi Xelaev18039961m.g | actn1.L           | ACTN1     | 49.51 | 21.27 | -4.36  | 0.75 | 4.23E-09 |
| E2 | mi Xelaev18000853m.g | serpine1.S        | N/B       | 48.68 | 52.31 | 3.17   | 0.95 | 3.49E-22 |
| E2 | mi Xelaev18003784m.g | ctgf.S            | CTGF      | 47.70 | 55.71 | 17.86  | 0.91 | 5.94E-18 |
| E2 | mi Xelaev18024193m.g | fosl1.S           | FOSL1     | 45.88 | 36.12 | -14.20 | 0.93 | 1.97E-19 |
| E2 | mi Xelaev18002248m.g | Xelaev18002248m.g | N/B       | 45.74 | 32.54 | -8.41  | 0.77 | 8.15E-10 |
| E2 | mi Xelaev18036267m.g | btg5.L            | BTG3      | 45.25 | 61.90 | 5.05   | 0.98 | 5.63E-30 |
| E2 | mi Xelaev18040146m.g | thbs1.L           | THBS1     | 44.59 | 42.58 | -10.89 | 0.95 | 4.25E-23 |
| E2 | mi Xelaev18009500m.g | cxcl8.S           | N/B       | 42.26 | 28.13 | -9.76  | 0.91 | 1.38E-17 |
| E2 | mi Xelaev18004505m.g | pdlim1.S          | PDLIM1    | 41.19 | 46.90 | -8.02  | 0.72 | 2.69E-08 |
| E2 | mi Xelaev18026396m.g | Xelaev18026396m.g | HIST1H2BJ | 40.52 | 36.26 | -6.66  | 0.81 | 3.62E-11 |
| E2 | mi Xelaev18005127m.g | wdr1.L            | WDR1      | 39.31 | 35.52 | -0.07  | 0.73 | 2.51E-08 |
| E2 | mi Xelaev18019168m.g | serpine1.L        | N/B       | 39.29 | 27.86 | -15.74 | 0.92 | 2.57E-18 |
| E2 | mi Xelaev18019226m.g | loc100496442.L    | N/B       | 38.68 | 33.60 | -7.63  | 0.78 | 4.52E-10 |
| E2 | mi Xelaev18042870m.g | tmem79.S          | TMEM79    | 37.51 | 10.15 | -3.99  | 0.77 | 9.51E-10 |
| E2 | mi Xelaev18005828m.g | Xelaev18005828m.g | N/B       | 36.13 | 39.57 | -7.43  | 0.92 | 4.90E-19 |
| E2 | mi Xelaev18037813m.g | loc733735.S       | CDC42EP4  | 35.73 | 23.86 | -11.74 | 0.77 | 9.01E-10 |

|    |                      |                   |          |       |       |        |      |          |
|----|----------------------|-------------------|----------|-------|-------|--------|------|----------|
| E2 | mi Xelaev18006292m.g | angptl4.L         | ANGPTL4  | 35.68 | 22.87 | -12.15 | 0.86 | 6.13E-14 |
| E2 | mi Xelaev18028546m.g | srf.S             | SRF      | 35.23 | 25.82 | -4.56  | 0.75 | 3.32E-09 |
| E2 | mi Xelaev18020909m.g | pfkfb3.S          | PFKFB3   | 34.30 | 59.51 | 30.19  | 0.90 | 3.63E-17 |
| E2 | mi Xelaev18025526m.g | Xelaev18025526m.g | N/B      | 34.16 | 18.31 | -10.24 | 0.73 | 1.53E-08 |
| E2 | mi Xelaev18009822m.g | angptl4.S         | ANGPTL4  | 33.01 | 34.90 | -6.76  | 0.74 | 1.07E-08 |
| E2 | mi Xelaev18016099m.g | lima1.S           | LIMA1    | 31.62 | 49.31 | 0.98   | 0.95 | 3.62E-22 |
| E2 | mi Xelaev18012016m.g | cdkn1a.L          | CDKN1A   | 31.36 | 29.16 | -15.13 | 0.84 | 8.68E-13 |
| E2 | mi Xelaev18021488m.g | irf1.S            | IRF1     | 29.15 | 12.90 | -9.49  | 0.82 | 1.26E-11 |
| E2 | mi Xelaev18036485m.g | Xetrov90019643m.L | N/B      | 27.32 | 30.00 | -8.50  | 0.83 | 2.68E-12 |
| E2 | mi Xelaev18041148m.g | btbd6.S           | BTBD6    | 27.20 | 13.72 | -11.46 | 0.78 | 5.10E-10 |
| E2 | mi Xelaev18046848m.g | slc16a6.S         | SLC16A6  | 27.15 | 56.68 | 27.68  | 0.93 | 6.83E-20 |
| E2 | mi Xelaev18014950m.g | nuak2.S           | NUAK2    | 26.57 | 37.45 | 12.80  | 0.79 | 2.08E-10 |
| E2 | mi Xelaev18046073m.g | map3k14.S         | MAP3K14  | 26.38 | 10.69 | -15.84 | 0.81 | 3.90E-11 |
| E2 | mi Xelaev18013815m.g | birc2.L           | BIRC2    | 25.18 | 33.60 | -6.72  | 0.66 | 1.25E-06 |
| E2 | mi Xelaev18043136m.g | Xelaev18043136m.g | ARF3     | 24.99 | 13.00 | -9.47  | 0.61 | 1.09E-05 |
| E2 | mi Xelaev18026400m.g | Xelaev18026400m.g | HIST1H1D | 24.12 | 32.09 | -0.32  | 0.78 | 4.87E-10 |
| E2 | mi Xelaev18010901m.g | Xelaev18010901m.g | F2RL1    | 24.04 | 41.72 | 0.68   | 0.82 | 7.84E-12 |
| E2 | mi Xelaev18012102m.g | fam46b.L          | TENT5A   | 23.07 | 18.08 | -2.46  | 0.80 | 4.82E-11 |
| E2 | mi Xelaev18047117m.g | upp2.S            | UPP2     | 22.22 | 30.82 | 1.20   | 0.84 | 5.61E-13 |
| E2 | mi Xelaev18033923m.g | azin1.S           | AZIN1    | 21.86 | 35.69 | -1.65  | 0.81 | 2.61E-11 |
| E2 | mi Xelaev18036272m.g | Xelaev18036272m.g | CMKLR1   | 20.68 | 23.21 | -4.38  | 0.69 | 1.94E-07 |
| E2 | mi Xelaev18014461m.g | nr1i2.S           | NR1I2    | 20.51 | 18.60 | -11.89 | 0.80 | 6.70E-11 |
| E2 | mi Xelaev18047416m.g | nab1.S            | NAB1     | 20.33 | 24.32 | -12.71 | 0.79 | 1.34E-10 |
| E2 | mi Xelaev18043154m.g | csf3.L            | N/B      | 18.61 | 31.65 | 0.05   | 0.74 | 1.22E-08 |
| E2 | mi Xelaev18024085m.g | ppp4r2.L          | PPP4R2   | 18.10 | 31.38 | 8.85   | 0.75 | 4.06E-09 |
| E2 | mi Xelaev18010243m.g | rem2.S            | REM2     | 17.43 | 30.94 | 5.36   | 0.79 | 2.81E-10 |

|    |                      |                   |          |       |       |        |      |          |
|----|----------------------|-------------------|----------|-------|-------|--------|------|----------|
| E2 | mi Xelaev18013440m.g | ddit3.L           | DDIT3    | 17.42 | 22.25 | -7.03  | 0.79 | 2.29E-10 |
| E2 | mi Xelaev18027688m.g | rap2b.L           | RAP2B    | 17.35 | 13.87 | -5.96  | 0.66 | 1.05E-06 |
| E2 | mi Xelaev18024237m.g | lrrn4cl.S         | LRRN4CL  | 17.02 | 12.80 | -8.51  | 0.74 | 1.12E-08 |
| E2 | mi Xelaev18033486m.g | stmnd1.S          | STMND1   | 16.76 | 20.98 | 2.22   | 0.64 | 3.00E-06 |
| E2 | mi Xelaev18015254m.g | luzp1.S           | LUZP1    | 16.49 | 21.33 | -2.38  | 0.72 | 2.93E-08 |
| E2 | mi Xelaev18008815m.g | smox.S            | SMOX     | 16.36 | 17.82 | -12.97 | 0.82 | 1.49E-11 |
| E2 | mi Xelaev18004051m.g | azin2.S           | ODC1     | 16.02 | 30.64 | -1.32  | 0.86 | 4.97E-14 |
| E2 | mi Xelaev18012053m.g | ptafr.L           | PTAFR    | 16.00 | 10.95 | -13.79 | 0.76 | 2.19E-09 |
| E2 | mi Xelaev18035744m.g | errfi1.L          | ERRFI1   | 15.72 | 14.31 | -12.02 | 0.87 | 1.89E-14 |
| E2 | mi Xelaev18010749m.g | znf474.S          | ZNF474   | 15.20 | 20.22 | -6.67  | 0.69 | 1.66E-07 |
| E2 | mi Xelaev18007404m.g | tbc1d10a.L        | TBC1D10A | 14.60 | 16.63 | -6.82  | 0.70 | 1.13E-07 |
| E2 | mi Xelaev18010195m.g | gadd45g.S         | GADD45G  | 14.28 | 15.34 | -0.96  | 0.70 | 1.35E-07 |
| E2 | mi Xelaev18034426m.g | Xelaev18034426m.g | LTBR     | 14.06 | 11.12 | -12.99 | 0.84 | 9.15E-13 |
| E2 | mi Xelaev18029955m.g | slc16a14.S        | SLC16A14 | 13.56 | 30.71 | 2.54   | 0.74 | 1.03E-08 |
| E2 | mi Xelaev18047474m.g | abat.S            | ABAT     | 13.34 | 33.71 | 4.13   | 0.68 | 3.03E-07 |
| E2 | mi Xelaev18038046m.g | Xelaev18038046m.g | N/B      | 12.90 | 20.64 | -8.16  | 0.83 | 1.86E-12 |
| E2 | mi Xelaev18028697m.g | ppp2r5a.S         | PPP2R5A  | 12.78 | 27.01 | -0.15  | 0.69 | 2.82E-07 |
| E2 | mi Xelaev18039489m.g | sptlc2.L          | SPTLC2   | 12.76 | 24.39 | 5.60   | 0.77 | 8.28E-10 |
| E2 | mi Xelaev18014228m.g | col8a1.S          | COL8A1   | 12.46 | 28.21 | -0.89  | 0.66 | 1.11E-06 |
| E2 | mi Xelaev18008178m.g | Xelaev18008178m.g | F2RL1    | 12.36 | 20.70 | -8.05  | 0.89 | 7.61E-16 |
| E2 | mi Xelaev18016815m.g | fgf23.1.L         | FGF23    | 12.24 | 31.91 | 3.95   | 0.71 | 6.52E-08 |
| E2 | mi Xelaev18045117m.g | abat.L            | ABAT     | 12.12 | 12.79 | -7.15  | 0.67 | 6.62E-07 |
| E2 | mi Xelaev18023532m.g | slc25a38.L        | SLC25A38 | 11.91 | 12.25 | 2.00   | 0.64 | 2.47E-06 |
| E2 | mi Xelaev18018522m.g | loc100485269.L    | HK2      | 10.92 | 31.92 | 7.10   | 0.76 | 1.60E-09 |
| E2 | mi Xelaev18014572m.g | Xelaev18014572m.g | N/B      | 10.87 | 39.32 | 7.82   | 0.90 | 1.02E-16 |
| E2 | mi Xelaev18013467m.g | cyp27b1.L         | CYP27B1  | 10.51 | 30.25 | -1.46  | 0.79 | 1.40E-10 |

|    |                      |                   |         |        |       |        |      |          |
|----|----------------------|-------------------|---------|--------|-------|--------|------|----------|
| E2 | mi Xelaev18014759m.g | mid1ip1.S         | MID1IP1 | 10.36  | 44.37 | 25.83  | 0.69 | 2.74E-07 |
| E2 | mi Xelaev18035648m.g | ccn12.L           | CCNL2   | 10.31  | 29.14 | -1.29  | 0.69 | 2.10E-07 |
| E2 | mi Xelaev18044244m.g | slc16a6.L         | SLC16A6 | 10.29  | 44.35 | 13.19  | 0.86 | 1.40E-13 |
| E2 | mi Xelaev18037971m.g | epha2.S           | EPHA2   | 10.14  | 15.81 | -9.33  | 0.77 | 1.14E-09 |
| l1 | mi Xelaev18038146m.g | timp-1.L          | TIMP1   | 116.79 | 80.17 | -8.10  | 0.99 | 8.93E-36 |
| l1 | mi Xelaev18017925m.g | lep.L             | LEP     | 113.83 | 96.57 | -1.98  | 0.95 | 2.03E-22 |
| l1 | mi Xelaev18044787m.g | frzb.L            | FRZB    | 104.06 | 58.28 | 2.36   | 0.95 | 3.24E-22 |
| l1 | mi Xelaev18044618m.g | itgb6.L           | ITGB6   | 102.42 | 81.22 | 1.12   | 0.92 | 3.44E-18 |
| l1 | mi Xelaev18030023m.g | ccl34.S           | N/B     | 99.22  | 73.62 | -9.72  | 0.96 | 6.69E-24 |
| l1 | mi Xelaev18046858m.g | Xelaev18046858m.g | CACNG5  | 99.18  | 48.51 | 13.81  | 0.91 | 2.63E-17 |
| l1 | mi Xelaev18038172m.g | glipr2.L          | GLIPR2  | 95.26  | 45.11 | 10.00  | 0.97 | 6.39E-29 |
| l1 | mi Xelaev18019016m.g | s1pr5.L           | S1PR1   | 95.26  | 64.71 | -7.71  | 0.97 | 2.09E-27 |
| l1 | mi Xelaev18011464m.g | runx1.L           | RUNX1   | 94.89  | 56.24 | 5.49   | 0.97 | 1.19E-27 |
| l1 | mi Xelaev18006245m.g | cnn1.L            | CNN2    | 92.27  | 87.20 | 12.06  | 0.94 | 7.58E-21 |
| l1 | mi Xelaev18020863m.g | lep.S             | LEP     | 89.88  | 55.08 | -8.68  | 0.91 | 1.20E-17 |
| l1 | mi Xelaev18042523m.g | mgc69520.S        | GPR4    | 89.57  | 66.79 | 8.72   | 0.96 | 1.42E-25 |
| l1 | mi Xelaev18009775m.g | cnn1.S            | CNN2    | 87.84  | 83.20 | 18.72  | 0.88 | 5.28E-15 |
| l1 | mi Xelaev18013388m.g | mmp19.L           | MMP19   | 85.88  | 42.68 | 1.26   | 0.97 | 1.24E-26 |
| l1 | mi Xelaev18005895m.g | sgk223.L          | PRAG1   | 84.63  | 59.02 | -11.68 | 0.95 | 2.40E-23 |
| l1 | mi Xelaev18003033m.g | wnt5a.S           | WNT5A   | 84.19  | 55.02 | -5.11  | 0.90 | 1.47E-16 |
| l1 | mi Xelaev18025949m.g | loc100498463.S    | N/B     | 83.81  | 63.11 | -9.61  | 0.96 | 1.57E-24 |
| l1 | mi Xelaev18027985m.g | ccl34.L           | N/B     | 83.20  | 58.88 | -3.64  | 0.94 | 1.32E-20 |
| l1 | mi Xelaev18041405m.g | timp-1.S          | TIMP1   | 83.02  | 33.26 | 5.81   | 0.94 | 9.58E-22 |
| l1 | mi Xelaev18041771m.g | fam129b.S         | FAM129B | 81.77  | 55.77 | -3.31  | 0.95 | 9.72E-24 |
| l1 | mi Xelaev18013645m.g | lima1.L           | LIMA1   | 78.29  | 69.22 | -10.94 | 0.92 | 3.15E-19 |
| l1 | mi Xelaev18022186m.g | rassf7.L          | RASSF8  | 78.26  | 43.96 | -0.77  | 0.94 | 5.36E-22 |



|    |                      |                     |           |       |       |        |      |          |
|----|----------------------|---------------------|-----------|-------|-------|--------|------|----------|
| l1 | mi Xelaev18008304m.g | itga2.L             | ITGA2     | 76.89 | 50.05 | -7.35  | 0.96 | 1.03E-24 |
| l1 | mi Xelaev18007696m.g | cldn5.L             | CLDN5     | 76.34 | 51.19 | -11.20 | 0.87 | 3.68E-14 |
| l1 | mi Xelaev18002370m.g | tnfrsf12a           | TNFRSF12A | 76.05 | 61.04 | -11.31 | 0.91 | 5.97E-18 |
| l1 | mi Xelaev18043629m.g | tnfrsf6b.L          | TNFRSF6B  | 75.04 | 47.72 | -8.99  | 0.91 | 6.87E-18 |
| l1 | mi Xelaev18027421m.g | chrd.2.L            | CHRD      | 74.80 | 58.42 | -4.76  | 0.94 | 1.72E-21 |
| l1 | mi Xelaev18012752m.g | ccl4.L              | CCL4L1    | 73.84 | 51.79 | -8.96  | 0.83 | 2.22E-12 |
| l1 | mi Xelaev18011164m.g | ccl19.S             | CCL19     | 73.22 | 35.42 | 2.86   | 0.91 | 1.26E-17 |
| l1 | mi Xelaev18023847m.g | manf.L              | MANF      | 72.79 | 64.43 | 22.34  | 0.95 | 4.17E-22 |
| l1 | mi Xelaev18037758m.g | Xelaev18037758m.g   | NECTIN2   | 69.34 | 58.80 | -0.95  | 0.95 | 1.07E-23 |
| l1 | mi Xelaev18007632m.g | loc100493155.L      | C22orf15  | 65.82 | 57.83 | 6.82   | 0.91 | 7.80E-18 |
| l1 | mi Xelaev18037390m.g | tagln.S             | TAGLN     | 65.72 | 56.71 | -7.80  | 0.89 | 8.26E-16 |
| l1 | mi Xelaev18027435m.g | loc100490020.L      | N/B       | 65.55 | 48.23 | -9.24  | 0.94 | 6.15E-22 |
| l1 | mi Xelaev18041161m.g | inf2.S              | INF2      | 65.50 | 43.64 | -4.87  | 0.92 | 4.29E-19 |
| l1 | mi Xelaev18043108m.g | krt17.L             | KRT17     | 65.16 | 38.35 | -7.86  | 0.91 | 6.60E-18 |
| l1 | mi Xelaev18037781m.g | rras.S              | RRAS2     | 64.40 | 33.33 | -4.46  | 0.88 | 4.25E-15 |
| l1 | mi Xelaev18029868m.g | loc100490428-like.S | DBNDD2    | 64.31 | 44.89 | -8.99  | 0.92 | 9.94E-19 |
| l1 | mi Xelaev18018132m.g | gcnt3.L             | GCNT3     | 63.38 | 51.82 | -5.24  | 0.88 | 1.58E-15 |
| l1 | mi Xelaev18041455m.g | ambp.S              | AMBP      | 63.09 | 46.61 | -4.36  | 0.89 | 3.59E-16 |
| l1 | mi Xelaev18036515m.g | fxyd5.L             | N/B       | 62.30 | 23.60 | 6.97   | 0.86 | 4.24E-14 |
| l1 | mi Xelaev18002900m.g | msn.L               | MSN       | 62.27 | 48.53 | -5.96  | 0.87 | 1.28E-14 |
| l1 | mi Xelaev18044026m.g | slc9a3r1.L          | SLC9A3R1  | 62.06 | 37.97 | 3.32   | 0.88 | 5.23E-15 |
| l1 | mi Xelaev18023924m.g | lmcd1.L             | LMCD1     | 61.52 | 21.44 | 11.87  | 0.93 | 8.98E-20 |
| l1 | mi Xelaev18031953m.g | cdh2.L              | CDH2      | 61.16 | 28.85 | -2.46  | 0.83 | 2.34E-12 |
| l1 | mi Xelaev18041034m.g | actn1.S             | ACTN1     | 60.86 | 56.46 | -8.79  | 0.87 | 2.73E-14 |
| l1 | mi Xelaev18030736m.g | svil.L              | SVIL      | 60.81 | 20.62 | 6.68   | 0.91 | 2.56E-17 |
| l1 | mi Xelaev18026597m.g | polr1b.L            | POLR1B    | 60.30 | 64.04 | 18.33  | 0.88 | 4.65E-15 |

|    |                      |                   |           |       |       |        |      |          |
|----|----------------------|-------------------|-----------|-------|-------|--------|------|----------|
| l1 | mi Xelaev18023809m.g | mst1.L            | N/B       | 59.48 | 35.29 | -7.78  | 0.91 | 7.97E-18 |
| l1 | mi Xelaev18042667m.g | thbs1.S           | THBS1     | 58.92 | 31.12 | -6.62  | 0.82 | 1.57E-11 |
| l1 | mi Xelaev18030727m.g | itgb1.L           | ITGB1     | 58.84 | 33.33 | -8.16  | 0.95 | 5.23E-22 |
| l1 | mi Xelaev18046795m.g | metrnl.S          | METRNL    | 58.33 | 52.42 | -5.45  | 0.92 | 9.23E-19 |
| l1 | mi Xelaev18046913m.g | Xelaev18046913m.g | PARP14    | 57.66 | 36.57 | -6.19  | 0.91 | 2.81E-17 |
| l1 | mi Xelaev18018790m.g | plat.L            | PLAT      | 57.03 | 41.54 | -10.63 | 0.88 | 7.69E-15 |
| l1 | mi Xelaev18011873m.g | aifm3-like.L      | AIFM3     | 57.00 | 44.23 | -9.68  | 0.85 | 5.39E-13 |
| l1 | mi Xelaev18037885m.g | myadm.S           | MYADM     | 56.72 | 34.67 | -7.60  | 0.90 | 4.27E-17 |
| l1 | mi Xelaev18036474m.g | kirrel2.L         | KIRREL1   | 56.56 | 30.74 | -5.20  | 0.89 | 1.51E-15 |
| l1 | mi Xelaev18023533m.g | myh9.L            | MYH9      | 56.49 | 54.54 | -5.41  | 0.92 | 1.86E-18 |
| l1 | mi Xelaev18042284m.g | ednr2.S           | EDNRB     | 55.38 | 58.02 | 6.73   | 0.88 | 1.81E-15 |
| l1 | mi Xelaev18037564m.g | errfi1.S          | ERRFI1    | 55.19 | 51.25 | -6.32  | 0.83 | 4.95E-12 |
| l1 | mi Xelaev18036047m.g | rras.L            | RRAS2     | 54.90 | 35.31 | -9.55  | 0.85 | 2.50E-13 |
| l1 | mi Xelaev18014318m.g | rcan1.S           | RCAN1     | 54.61 | 35.58 | -5.51  | 0.90 | 1.78E-16 |
| l1 | mi Xelaev18037014m.g | noc3l.S           | NOC3L     | 53.01 | 58.18 | 24.70  | 0.91 | 6.32E-18 |
| l1 | mi Xelaev18016257m.g | mmp13.S           | MMP13     | 52.69 | 29.73 | -7.07  | 0.91 | 3.82E-18 |
| l1 | mi Xelaev18033969m.g | tnfrsf11b.S       | TNFRSF11B | 52.48 | 17.52 | 5.22   | 0.76 | 1.72E-09 |
| l1 | mi Xelaev18012754m.g | ccl42d.L          | CCL4L1    | 51.68 | 51.28 | 0.33   | 0.80 | 7.14E-11 |
| l1 | mi Xelaev18020453m.g | chsy1.S           | CHSY1     | 51.66 | 35.39 | -8.06  | 0.93 | 2.67E-19 |
| l1 | mi Xelaev18023313m.g | arhgap29.L        | ARHGAP29  | 51.65 | 32.88 | -14.94 | 0.88 | 7.43E-15 |
| l1 | mi Xelaev18033717m.g | rgs20.S           | RGS20     | 51.49 | 35.64 | -10.20 | 0.88 | 2.88E-15 |
| l1 | mi Xelaev18014128m.g | loc733316.S       | CD99      | 51.45 | 38.26 | -7.06  | 0.87 | 2.06E-14 |
| l1 | mi Xelaev18046223m.g | loc101731830.S    | BCAR3     | 51.40 | 46.65 | -9.69  | 0.86 | 1.08E-13 |
| l1 | mi Xelaev18002841m.g | Xelaev18002841m.g | FLNA      | 51.38 | 34.22 | -10.72 | 0.91 | 2.09E-17 |
| l1 | mi Xelaev18017304m.g | pdlim7.L          | PDLIM7    | 51.26 | 37.15 | -8.19  | 0.85 | 4.11E-13 |
| l1 | mi Xelaev18014321m.g | runx1.S           | RUNX1     | 51.07 | 35.51 | -8.16  | 0.88 | 4.09E-15 |

|    |                      |                     |          |       |       |        |      |          |
|----|----------------------|---------------------|----------|-------|-------|--------|------|----------|
| l1 | mi Xelaev18042752m.g | plekho1.S           | PLEKHO1  | 49.85 | 17.82 | -4.07  | 0.77 | 1.10E-09 |
| l1 | mi Xelaev18020263m.g | ddx56.S             | DDX56    | 49.83 | 49.75 | 4.64   | 0.88 | 1.86E-15 |
| l1 | mi Xelaev18026332m.g | wdr43.L             | WDR43    | 48.92 | 30.70 | -9.79  | 0.87 | 3.41E-14 |
| l1 | mi Xelaev18011753m.g | MGC115708.L         | CD99     | 48.51 | 20.44 | -0.49  | 0.91 | 1.96E-17 |
| l1 | mi Xelaev18027420m.g | chrd.1.L            | CHRD     | 48.29 | 38.89 | -10.66 | 0.90 | 1.76E-16 |
| l1 | mi Xelaev18012947m.g | il1r2.L             | IL1R2    | 48.11 | 28.22 | -5.59  | 0.91 | 2.37E-17 |
| l1 | mi Xelaev18025550m.g | myh9.S              | MYH9     | 47.56 | 56.74 | 4.85   | 0.89 | 7.39E-16 |
| l1 | mi Xelaev18026425m.g | rsph9.L             | RSPH9    | 47.01 | 33.33 | 1.01   | 0.79 | 1.85E-10 |
| l1 | mi Xelaev18018454m.g | smad3.L             | SMAD3    | 46.94 | 25.83 | -9.68  | 0.80 | 8.19E-11 |
| l1 | mi Xelaev18031194m.g | inhba.L             | INHBA    | 45.89 | 26.54 | -8.70  | 0.81 | 2.55E-11 |
| l1 | mi Xelaev18006910m.g | gcnt1.L             | GCNT1    | 45.69 | 27.03 | -9.51  | 0.88 | 7.20E-15 |
| l1 | mi Xelaev18036965m.g | pargc1-like.S       | PPRC1    | 44.83 | 53.89 | 13.52  | 0.89 | 3.55E-16 |
| l1 | mi Xelaev18016263m.g | mmp1.S              | N/B      | 44.79 | 39.84 | -6.56  | 0.90 | 6.37E-17 |
| l1 | mi Xelaev18008990m.g | tbc1d1.S            | TBC1D1   | 44.59 | 26.72 | -3.72  | 0.88 | 7.04E-15 |
| l1 | mi Xelaev18036170m.g | ccdc63.L            | CCDC63   | 44.57 | 31.62 | -8.08  | 0.85 | 1.73E-13 |
| l1 | mi Xelaev18021305m.g | dram1.S             | DRAM1    | 44.41 | 39.63 | -1.06  | 0.89 | 4.16E-16 |
| l1 | mi Xelaev18003274m.g | chrng.L             | CHRNA    | 44.39 | 46.44 | -7.08  | 0.89 | 6.59E-16 |
| l1 | mi Xelaev18030711m.g | pitrm1.L            | PITRM1   | 44.25 | 48.28 | 5.63   | 0.90 | 2.54E-16 |
| l1 | mi Xelaev18017422m.g | nuak1.L             | NUAK1    | 44.13 | 37.37 | -11.63 | 0.87 | 1.07E-14 |
| l1 | mi Xelaev18010898m.g | f2rl2.S             | F2RL2    | 40.86 | 32.51 | -12.28 | 0.86 | 8.68E-14 |
| l1 | mi Xelaev18029825m.g | plod2.S             | PLOD2    | 40.20 | 38.61 | -9.22  | 0.84 | 1.27E-12 |
| l1 | mi Xelaev18034677m.g | pargc1-like.L       | PPRC1    | 39.95 | 60.69 | 21.17  | 0.92 | 2.02E-18 |
| l1 | mi Xelaev18046673m.g | slc9a3r1.S          | SLC9A3R1 | 39.65 | 33.06 | 1.01   | 0.89 | 6.29E-16 |
| l1 | mi Xelaev18038794m.g | loc100492639-like.L | KCNE5    | 39.48 | 26.00 | -10.67 | 0.88 | 1.61E-15 |
| l1 | mi Xelaev18032266m.g | fzd6.L              | FZD6     | 39.35 | 44.36 | -6.99  | 0.92 | 1.21E-18 |
| l1 | mi Xelaev18016812m.g | loc100496642-like.L | SLC45A3  | 39.14 | 54.31 | 7.79   | 0.75 | 3.74E-09 |

|    |                      |                   |          |       |       |        |      |          |
|----|----------------------|-------------------|----------|-------|-------|--------|------|----------|
| l1 | mi Xelaev18025380m.g | arhgap29.S        | ARHGAP29 | 38.89 | 34.41 | -10.70 | 0.85 | 2.68E-13 |
| l1 | mi Xelaev18042942m.g | c2cd4d.S          | C2CD4C   | 38.70 | 37.49 | -9.18  | 0.91 | 2.45E-17 |
| l1 | mi Xelaev18026176m.g | Xelaev18026176m.g | ABCB5    | 38.50 | 23.13 | -9.79  | 0.87 | 2.26E-14 |
| l1 | mi Xelaev18043548m.g | ctsz.L            | CTSZ     | 38.23 | 29.89 | -10.23 | 0.83 | 3.09E-12 |
| l1 | mi Xelaev18019577m.g | sox15.L           | SOX15    | 38.06 | 14.81 | -4.82  | 0.82 | 8.38E-12 |
| l1 | mi Xelaev18047015m.g | loc100497528.S    | TUBA1A   | 37.99 | 14.46 | -5.90  | 0.82 | 1.61E-11 |
| l1 | mi Xelaev18028091m.g | nt5c1a.L          | NT5C1A   | 37.96 | 36.31 | -5.22  | 0.73 | 1.99E-08 |
| l1 | mi Xelaev18013609m.g | krt18.L           | KRT18    | 37.81 | 44.93 | 6.09   | 0.87 | 1.12E-14 |
| l1 | mi Xelaev18009561m.g | sgk223.S          | PRAG1    | 37.79 | 32.01 | -12.54 | 0.86 | 1.17E-13 |
| l1 | mi Xelaev18026601m.g | dzank1.L          | DZANK1   | 37.47 | 38.22 | -4.19  | 0.88 | 6.10E-15 |
| l1 | mi Xelaev18016071m.g | krt18.S           | KRT18    | 37.38 | 47.54 | 12.95  | 0.83 | 4.51E-12 |
| l1 | mi Xelaev18021801m.g | adm.L             | ADM      | 36.99 | 35.90 | -9.32  | 0.87 | 2.06E-14 |
| l1 | mi Xelaev18020018m.g | ctnna1.S          | CTNNA1   | 36.86 | 25.53 | -11.99 | 0.71 | 8.36E-08 |
| l1 | mi Xelaev18021522m.g | hbegf.S           | HBEGF    | 36.73 | 40.98 | 4.65   | 0.74 | 1.32E-08 |
| l1 | mi Xelaev18023312m.g | f3.L              | F3       | 36.60 | 37.47 | -8.31  | 0.77 | 1.30E-09 |
| l1 | mi Xelaev18038898m.g | utp14a.L          | UTP14A   | 36.27 | 38.17 | 6.75   | 0.78 | 3.35E-10 |
| l1 | mi Xelaev18008403m.g | grp.L             | GRP      | 35.99 | 33.54 | -6.64  | 0.74 | 1.09E-08 |
| l1 | mi Xelaev18025555m.g | hmox1.S           | HMOX1    | 35.78 | 19.28 | -8.72  | 0.91 | 6.62E-18 |
| l1 | mi Xelaev18045011m.g | wdr75.L           | WDR75    | 35.41 | 45.47 | 12.10  | 0.86 | 5.66E-14 |
| l1 | mi Xelaev18043099m.g | jup.L             | JUP      | 35.32 | 28.38 | -11.02 | 0.78 | 4.46E-10 |
| l1 | mi Xelaev18043463m.g | sall4.L           | SALL4    | 35.08 | 27.45 | -12.23 | 0.87 | 1.28E-14 |
| l1 | mi Xelaev18005047m.g | cfap99.L          | CFAP99   | 34.96 | 22.60 | -6.86  | 0.82 | 8.93E-12 |
| l1 | mi Xelaev18014129m.g | mxra5.S           | MXRA5    | 34.96 | 21.57 | -10.63 | 0.78 | 5.99E-10 |
| l1 | mi Xelaev18032888m.g | armac4.S          | ARMC4    | 34.58 | 17.83 | -8.36  | 0.79 | 1.24E-10 |
| l1 | mi Xelaev18020589m.g | homer2.S          | HOMER2   | 34.44 | 32.20 | -5.72  | 0.88 | 6.05E-15 |
| l1 | mi Xelaev18021364m.g | hk2.S             | HK2      | 34.28 | 22.75 | -10.54 | 0.75 | 3.44E-09 |

|    |                      |                   |          |       |       |        |      |          |
|----|----------------------|-------------------|----------|-------|-------|--------|------|----------|
| l1 | mi Xelaev18013369m.g | erbb3.L           | ERBB3    | 33.99 | 18.33 | -9.30  | 0.73 | 1.98E-08 |
| l1 | mi Xelaev18033773m.g | c8orf46.S         | N/B      | 33.79 | 24.02 | -9.97  | 0.65 | 1.69E-06 |
| l1 | mi Xelaev18017788m.g | ptpn12.L          | N/B      | 33.66 | 45.62 | 8.34   | 0.86 | 3.97E-14 |
| l1 | mi Xelaev18008531m.g | il11ra.L          | IL11RA   | 33.61 | 17.33 | -10.79 | 0.88 | 2.93E-15 |
| l1 | mi Xelaev18038628m.g | loc100145115.L    | STARD10  | 33.13 | 36.42 | 2.83   | 0.80 | 9.22E-11 |
| l1 | mi Xelaev18038251m.g | Xelaev18038251m.g | FCN1     | 33.07 | 34.28 | -4.97  | 0.77 | 1.46E-09 |
| l1 | mi Xelaev18028139m.g | tnfrsf21.L        | TNFRSF21 | 32.77 | 20.60 | -10.93 | 0.86 | 5.73E-14 |
| l1 | mi Xelaev18026607m.g | snx5.L            | SNX5     | 32.76 | 23.50 | -8.05  | 0.71 | 5.56E-08 |
| l1 | mi Xelaev18011697m.g | rab34.L           | RAB34    | 32.59 | 24.91 | -5.72  | 0.84 | 1.21E-12 |
| l1 | mi Xelaev18014496m.g | ptgfrn.S          | PTGFRN   | 32.50 | 23.81 | -8.97  | 0.79 | 2.15E-10 |
| l1 | mi Xelaev18005289m.g | kdr.L             | KDR      | 32.39 | 27.06 | -8.88  | 0.86 | 9.40E-14 |
| l1 | mi Xelaev18026428m.g | srf.L             | SRF      | 31.56 | 16.93 | -7.25  | 0.65 | 1.80E-06 |
| l1 | mi Xelaev18020231m.g | adam28.S          | ADAM28   | 31.05 | 12.05 | -6.33  | 0.80 | 7.10E-11 |
| l1 | mi Xelaev18013190m.g | irg1.L            | ACOD1    | 30.93 | 31.50 | -6.31  | 0.76 | 2.12E-09 |
| l1 | mi Xelaev18016349m.g | prss23.S          | PRSS23   | 30.76 | 14.48 | -9.40  | 0.79 | 2.69E-10 |
| l1 | mi Xelaev18014768m.g | sytl5.S           | SYTL5    | 30.76 | 15.66 | -8.67  | 0.65 | 1.69E-06 |
| l1 | mi Xelaev18005548m.g | ucp1.L            | N/B      | 29.98 | 11.68 | -8.06  | 0.80 | 9.46E-11 |
| l1 | mi Xelaev18022156m.g | ehd1.L            | EHD1     | 29.71 | 47.91 | 10.10  | 0.90 | 1.00E-16 |
| l1 | mi Xelaev18020683m.g | Xelaev18020683m.g | MYO1E    | 29.57 | 24.11 | -9.99  | 0.83 | 4.29E-12 |
| l1 | mi Xelaev18044394m.g | loc100496446.L    | MRAS     | 29.57 | 38.82 | -3.98  | 0.79 | 2.36E-10 |
| l1 | mi Xelaev18019841m.g | etv6.S            | ETV6     | 29.55 | 15.80 | -16.22 | 0.82 | 1.45E-11 |
| l1 | mi Xelaev18040535m.g | crabp2.L          | CRABP2   | 29.46 | 22.13 | -4.16  | 0.75 | 3.75E-09 |
| l1 | mi Xelaev18008425m.g | ccdc68.L          | CCDC68   | 29.30 | 41.81 | 4.35   | 0.86 | 8.70E-14 |
| l1 | mi Xelaev18011172m.g | dnajb5-like.S     | DNAJB5   | 29.25 | 42.69 | 5.37   | 0.81 | 3.71E-11 |
| l1 | mi Xelaev18029887m.g | sept2.S           | 37500    | 29.20 | 31.03 | -3.79  | 0.82 | 1.22E-11 |
| l1 | mi Xelaev18046311m.g | Xelaev18046311m.g | DEPTOR   | 29.03 | 23.91 | -8.05  | 0.79 | 2.45E-10 |

|    |                      |                     |         |       |       |        |      |          |
|----|----------------------|---------------------|---------|-------|-------|--------|------|----------|
| l1 | mi Xelaev18026141m.g | Xelaev18026141m.g   | RHOQ    | 28.96 | 41.62 | -5.19  | 0.81 | 2.65E-11 |
| l1 | mi Xelaev18021137m.g | pawr.S              | PAWR    | 28.84 | 20.85 | -10.33 | 0.85 | 3.96E-13 |
| l1 | mi Xelaev18038421m.g | crb2.L              | CRB2    | 28.71 | 23.32 | -4.13  | 0.82 | 6.89E-12 |
| l1 | mi Xelaev18009362m.g | arsj.S              | N/B     | 28.18 | 26.86 | -11.56 | 0.86 | 6.82E-14 |
| l1 | mi Xelaev18032744m.g | ccm2.S              | CCM2    | 28.00 | 30.83 | -7.69  | 0.78 | 3.94E-10 |
| l1 | mi Xelaev18031526m.g | cdh6.L              | CDH6    | 27.79 | 14.86 | -6.53  | 0.81 | 4.35E-11 |
| l1 | mi Xelaev18015134m.g | loc100485272-like.S | ANGPT2  | 27.77 | 15.94 | -10.59 | 0.65 | 2.17E-06 |
| l1 | mi Xelaev18018158m.g | Xelaev18018158m.g   | MYO1E   | 26.90 | 14.05 | -10.20 | 0.77 | 1.29E-09 |
| l1 | mi Xelaev18047027m.g | ttl4.S              | TLL4    | 26.72 | 32.69 | -6.20  | 0.83 | 3.44E-12 |
| l1 | mi Xelaev18036418m.g | pqlc2.L             | PQLC2   | 26.57 | 26.38 | -12.31 | 0.91 | 1.54E-17 |
| l1 | mi Xelaev18034251m.g | afap1l2.L           | AFAP1L2 | 26.53 | 37.74 | -3.57  | 0.86 | 5.34E-14 |
| l1 | mi Xelaev18004443m.g | ccdc151.L           | CCDC151 | 26.53 | 24.25 | -6.74  | 0.80 | 7.78E-11 |
| l1 | mi Xelaev18012795m.g | ncf1.L              | NCF1C   | 26.48 | 25.10 | -8.59  | 0.83 | 4.71E-12 |
| l1 | mi Xelaev18044527m.g | pnkd.L              | PNKD    | 26.33 | 28.01 | 5.24   | 0.83 | 3.48E-12 |
| l1 | mi Xelaev18047501m.g | gspt1.S             | GSPT1   | 26.15 | 36.67 | 7.36   | 0.80 | 9.87E-11 |
| l1 | mi Xelaev18010916m.g | lhfp12.S            | LHFPL2  | 25.82 | 29.44 | -4.20  | 0.80 | 4.70E-11 |
| l1 | mi Xelaev18029097m.g | tnfaip3.S           | TNFAIP3 | 25.26 | 18.01 | -10.15 | 0.73 | 1.92E-08 |
| l1 | mi Xelaev18041763m.g | Xelaev18041763m.g   | FLNA    | 25.11 | 17.20 | -9.61  | 0.84 | 6.02E-13 |
| l1 | mi Xelaev18025818m.g | slurp1l.S           | N/B     | 25.10 | 14.81 | -8.88  | 0.76 | 2.13E-09 |
| l1 | mi Xelaev18036171m.g | myadm.L             | MYADM   | 24.68 | 24.52 | -11.28 | 0.76 | 1.51E-09 |
| l1 | mi Xelaev18028224m.g | efhc1.L             | EFHC1   | 24.52 | 20.94 | -11.00 | 0.81 | 2.51E-11 |
| l1 | mi Xelaev18010899m.g | f2r.S               | F2R     | 24.49 | 18.99 | -6.50  | 0.73 | 1.79E-08 |
| l1 | mi Xelaev18032013m.g | rgs20.L             | RGS20   | 24.20 | 13.20 | -10.18 | 0.85 | 1.62E-13 |
| l1 | mi Xelaev18015457m.g | egfl6.S             | EGFL6   | 24.02 | 31.38 | -3.05  | 0.73 | 2.08E-08 |
| l1 | mi Xelaev18018318m.g | unc45a.L            | UNC45A  | 23.83 | 45.18 | 18.18  | 0.81 | 3.80E-11 |
| l1 | mi Xelaev18001387m.g | Xelaev18001387m.g   | ZNF510  | 23.22 | 27.24 | -4.80  | 0.74 | 7.03E-09 |

|    |                      |                   |         |       |       |        |      |          |
|----|----------------------|-------------------|---------|-------|-------|--------|------|----------|
| l1 | mi Xelaev18022681m.g | c9orf117.L        | CFAP157 | 23.18 | 11.97 | -5.53  | 0.77 | 1.13E-09 |
| l1 | mi Xelaev18029210m.g | ankrd60-like.S    | ANKRD60 | 22.44 | 23.74 | -7.72  | 0.79 | 2.64E-10 |
| l1 | mi Xelaev18027042m.g | rsph3.L           | RSPH3   | 21.90 | 10.45 | -4.64  | 0.77 | 9.67E-10 |
| l1 | mi Xelaev18045253m.g | il21r.L           | IL21R   | 21.75 | 13.55 | -11.87 | 0.76 | 2.41E-09 |
| l1 | mi Xelaev18045172m.g | gspt1.L           | GSPT1   | 21.23 | 23.44 | 2.10   | 0.77 | 1.19E-09 |
| l1 | mi Xelaev18027603m.g | lrrc34.L          | LRRC34  | 21.08 | 21.26 | -8.49  | 0.80 | 6.44E-11 |
| l1 | mi Xelaev18004560m.g | Xelaev18004560m.g | URGCP   | 20.88 | 12.54 | -11.50 | 0.77 | 1.48E-09 |
| l1 | mi Xelaev18044336m.g | dtx3l-like.L      | DTX3L   | 20.80 | 22.87 | -10.89 | 0.86 | 6.08E-14 |
| l1 | mi Xelaev18010354m.g | lif.S             | N/B     | 20.49 | 23.98 | -7.27  | 0.78 | 3.02E-10 |
| l1 | mi Xelaev18033963m.g | ext1.S            | EXT1    | 20.41 | 11.92 | -11.60 | 0.72 | 3.52E-08 |
| l1 | mi Xelaev18021822m.g | tspan18.L         | TSPAN18 | 20.28 | 23.39 | -6.52  | 0.75 | 3.24E-09 |
| l1 | mi Xelaev18041922m.g | msn.S             | MSN     | 20.22 | 16.88 | -11.29 | 0.81 | 3.13E-11 |
| l1 | mi Xelaev18006614m.g | gatad2a.L         | GATAD2A | 20.16 | 23.75 | 0.89   | 0.67 | 7.57E-07 |
| l1 | mi Xelaev18025357m.g | soat1.S           | SOAT1   | 19.78 | 25.40 | -5.93  | 0.78 | 2.87E-10 |
| l1 | mi Xelaev18041868m.g | loc100493411.S    | N/B     | 19.44 | 17.99 | -11.41 | 0.70 | 1.04E-07 |
| l1 | mi Xelaev18039912m.g | fntb.L            | FNTB    | 19.40 | 39.87 | 12.10  | 0.76 | 1.54E-09 |
| l1 | mi Xelaev18022773m.g | loc100494152.L    | GPT2    | 19.02 | 23.07 | -2.49  | 0.69 | 2.65E-07 |
| l1 | mi Xelaev18035927m.g | sphk2.L           | SPHK2   | 18.77 | 25.27 | -6.29  | 0.83 | 5.61E-12 |
| l1 | mi Xelaev18012810m.g | p2rx1.L           | P2RX1   | 18.54 | 25.36 | -7.85  | 0.81 | 1.96E-11 |
| l1 | mi Xelaev18033982m.g | has2.S            | HAS2    | 18.44 | 11.04 | -11.79 | 0.84 | 1.03E-12 |
| l1 | mi Xelaev18006264m.g | prt3.L            | PRTN3   | 18.31 | 11.77 | -10.92 | 0.75 | 3.45E-09 |
| l1 | mi Xelaev18044177m.g | metrnl.L          | METRNL  | 17.84 | 19.96 | -6.33  | 0.72 | 3.45E-08 |
| l1 | mi Xelaev18006266m.g | ptbp1.L           | PTBP1   | 17.77 | 32.35 | -3.06  | 0.79 | 1.69E-10 |
| l1 | mi Xelaev18000573m.g | vcl.S             | VCL     | 17.77 | 22.31 | -8.35  | 0.88 | 7.36E-15 |
| l1 | mi Xelaev18011956m.g | camk1g.L          | CAMK1G  | 17.75 | 16.63 | -13.86 | 0.81 | 1.89E-11 |
| l1 | mi Xelaev18025779m.g | sema3b.S          | SEMA3B  | 17.69 | 42.08 | 11.27  | 0.78 | 4.50E-10 |

|    |                      |                   |          |       |       |        |      |          |
|----|----------------------|-------------------|----------|-------|-------|--------|------|----------|
| l1 | mi Xelaev18012341m.g | slc16a1.L         | SLC16A1  | 17.62 | 44.60 | 23.78  | 0.81 | 1.66E-11 |
| l1 | mi Xelaev18017616m.g | dnajb9.L          | DNAJB9   | 17.32 | 18.98 | -8.84  | 0.84 | 1.60E-12 |
| l1 | mi Xelaev18016945m.g | larp1.L           | LARP1    | 17.11 | 21.47 | -3.51  | 0.72 | 3.25E-08 |
| l1 | mi Xelaev18037757m.g | bcam.S            | BCAM     | 16.96 | 15.07 | -7.35  | 0.68 | 3.92E-07 |
| l1 | mi Xelaev18005470m.g | sfrp2.L           | SFRP2    | 16.64 | 24.41 | -1.16  | 0.75 | 3.90E-09 |
| l1 | mi Xelaev18033681m.g | Xelaev18033681m.g | B4GALT6  | 15.93 | 18.23 | -7.46  | 0.72 | 3.24E-08 |
| l1 | mi Xelaev18013610m.g | krt8.L            | KRT8     | 15.74 | 24.75 | -5.30  | 0.81 | 2.21E-11 |
| l1 | mi Xelaev18009793m.g | prtn3.S           | PRTN3    | 15.41 | 11.59 | -9.71  | 0.70 | 1.19E-07 |
| l1 | mi Xelaev18037759m.g | Xelaev18037759m.g | N/B      | 14.65 | 10.99 | -9.49  | 0.75 | 4.95E-09 |
| l1 | mi Xelaev18013657m.g | trim13.L          | TRIM13   | 14.63 | 27.07 | 3.41   | 0.84 | 8.00E-13 |
| l1 | mi Xelaev18012375m.g | mid1.L            | MID1     | 14.04 | 21.54 | -6.58  | 0.71 | 8.48E-08 |
| l1 | mi Xelaev18047380m.g | Xelaev18047380m.g | CREB1    | 13.42 | 17.68 | -7.67  | 0.61 | 1.27E-05 |
| l1 | mi Xelaev18001915m.g | slc7a5.S          | SLC7A5   | 13.19 | 28.10 | -0.65  | 0.77 | 1.41E-09 |
| l1 | mi Xelaev18037870m.g | cyth1-like.S      | CYTH2    | 13.07 | 15.94 | -9.86  | 0.69 | 1.73E-07 |
| l1 | mi Xelaev18005291m.g | tmem165.L         | TMEM165  | 13.01 | 13.54 | -2.03  | 0.76 | 3.00E-09 |
| l1 | mi Xelaev18046813m.g | cfap52.S          | CFAP52   | 12.97 | 15.83 | -2.91  | 0.71 | 5.12E-08 |
| l1 | mi Xelaev18039467m.g | ttl5.L            | TTLL5    | 12.62 | 20.12 | -5.04  | 0.70 | 1.19E-07 |
| l1 | mi Xelaev18010286m.g | Xetrov90002579m.S | CRYBB2   | 12.56 | 41.67 | 11.21  | 0.83 | 4.23E-12 |
| l1 | mi Xelaev18043951m.g | rbm12.L           | RBM12    | 12.47 | 23.73 | -0.83  | 0.63 | 4.06E-06 |
| l1 | mi Xelaev18007687m.g | Xelaev18007687m.g | N/B      | 12.19 | 12.55 | -10.03 | 0.72 | 3.73E-08 |
| l1 | mi Xelaev18041277m.g | ak7.S             | AK7      | 11.87 | 12.71 | 0.79   | 0.71 | 6.98E-08 |
| l1 | mi Xelaev18031583m.g | slc22a23.L        | SLC22A23 | 11.73 | 29.55 | 3.38   | 0.75 | 5.83E-09 |
| l1 | mi Xelaev18001214m.g | nans.S            | NANS     | 11.64 | 16.11 | -1.93  | 0.74 | 1.03E-08 |
| l1 | mi Xelaev18023653m.g | dnal4.L           | DNAL4    | 11.55 | 17.37 | -6.18  | 0.82 | 1.05E-11 |
| l1 | mi Xelaev18011823m.g | mpo.L             | EPX      | 11.31 | 10.13 | -7.68  | 0.81 | 3.25E-11 |
| l1 | mi Xelaev18039676m.g | pygl.L            | N/B      | 10.77 | 24.60 | 0.91   | 0.70 | 1.40E-07 |



|    |                      |                   |          |       |       |        |      |          |
|----|----------------------|-------------------|----------|-------|-------|--------|------|----------|
| I1 | mi Xelaev18020614m.g | shc4.S            | SHC4     | 10.55 | 14.92 | -16.06 | 0.56 | 7.29E-05 |
| I2 | mi Xelaev18021375m.g | pdlim7.S          | PDLIM7   | 43.66 | 50.47 | -3.03  | 0.88 | 4.06E-15 |
| I2 | mi Xelaev18025422m.g | clca3p-like.S     | CLCA4    | 42.24 | 10.51 | 2.24   | 0.74 | 1.14E-08 |
| I2 | mi Xelaev18021627m.g | loc100494743.S    | ICAM5    | 38.42 | 16.45 | -5.75  | 0.83 | 5.33E-12 |
| I2 | mi Xelaev18013257m.g | nufip1.L          | NUFIP1   | 36.15 | 44.46 | 5.78   | 0.90 | 3.70E-17 |
| I2 | mi Xelaev18018944m.g | adgre5.L          | ADGRE5   | 33.04 | 13.18 | -2.14  | 0.88 | 4.71E-15 |
| I2 | mi Xelaev18021991m.g | ppp1r32.L         | PPP1R32  | 32.52 | 24.20 | -11.21 | 0.79 | 2.26E-10 |
| I2 | mi Xelaev18027763m.g | wwtr1.L           | WWTR1    | 30.01 | 10.03 | -3.82  | 0.89 | 8.05E-16 |
| I2 | mi Xelaev18014304m.g | ifngr2.2.S        | N/B      | 29.90 | 22.33 | -12.75 | 0.89 | 3.00E-16 |
| I2 | mi Xelaev18018455m.g | Xelaev18018455m.g | N/B      | 29.57 | 20.56 | -10.86 | 0.60 | 1.74E-05 |
| I2 | mi Xelaev18023508m.g | emp1.L            | EMP1     | 28.18 | 19.67 | -12.11 | 0.76 | 2.11E-09 |
| I2 | mi Xelaev18034459m.g | dnttip2.L         | DNTTIP2  | 27.33 | 42.82 | 11.61  | 0.92 | 3.40E-18 |
| I2 | mi Xelaev18008376m.g | rai14.L           | RAI14    | 27.27 | 40.38 | 4.52   | 0.78 | 4.23E-10 |
| I2 | mi Xelaev18046166m.g | snai1.S           | SNAI2    | 26.82 | 23.82 | -11.76 | 0.66 | 9.71E-07 |
| I2 | mi Xelaev18047243m.g | frzb.S            | FRZB     | 25.98 | 35.19 | 4.45   | 0.81 | 3.36E-11 |
| I2 | mi Xelaev18044665m.g | ccdc173.L         | CCDC173  | 25.90 | 32.40 | -5.11  | 0.93 | 2.44E-19 |
| I2 | mi Xelaev18038343m.g | loc100487399.L    | PHF19    | 25.03 | 26.40 | -11.09 | 0.80 | 4.88E-11 |
| I2 | mi Xelaev18005059m.g | nop14.L           | NOP14    | 24.02 | 27.39 | -4.46  | 0.82 | 9.98E-12 |
| I2 | mi Xelaev18008154m.g | utp15.L           | UTP15    | 23.02 | 22.29 | -6.10  | 0.89 | 1.34E-15 |
| I2 | mi Xelaev18035579m.g | noc2l.L           | NOC2L    | 22.54 | 39.19 | 5.28   | 0.94 | 5.62E-21 |
| I2 | mi Xelaev18006390m.g | tpm4.L            | TPM4     | 22.50 | 25.92 | -7.25  | 0.86 | 4.54E-14 |
| I2 | mi Xelaev18023668m.g | rps19bp1.L        | RPS19BP1 | 22.40 | 20.92 | -4.31  | 0.64 | 3.36E-06 |
| I2 | mi Xelaev18023969m.g | ccdc37.L          | CFAP100  | 20.96 | 16.40 | -10.08 | 0.80 | 4.88E-11 |
| I2 | mi Xelaev18003217m.g | srsf10.S          | SRSF10   | 20.61 | 31.47 | -1.49  | 0.84 | 7.74E-13 |
| I2 | mi Xelaev18002851m.g | fam129b.L         | FAM129B  | 20.46 | 10.76 | -14.05 | 0.75 | 5.05E-09 |
| I2 | mi Xelaev18005436m.g | naf1.L            | NAF1     | 20.43 | 26.53 | -5.55  | 0.90 | 4.46E-17 |

|    |                      |                   |         |       |       |       |      |          |
|----|----------------------|-------------------|---------|-------|-------|-------|------|----------|
| I2 | mi Xelaev18026073m.g | trmt6.L           | TRMT6   | 18.98 | 32.28 | 9.59  | 0.82 | 9.34E-12 |
| I2 | mi Xelaev18009894m.g | tpm4.S            | TPM4    | 18.17 | 16.73 | -7.65 | 0.84 | 8.81E-13 |
| I2 | mi Xelaev18021622m.g | ppan.S            | PPAN    | 18.08 | 26.01 | -3.17 | 0.91 | 1.97E-17 |
| I2 | mi Xelaev18010555m.g | ranbp1.S          | RANBP1  | 17.92 | 24.94 | 9.21  | 0.84 | 8.83E-13 |
| I2 | mi Xelaev18009441m.g | EIF4E.S           | EIF4E   | 17.91 | 26.59 | 12.96 | 0.73 | 1.51E-08 |
| I2 | mi Xelaev18026236m.g | rrp15.L           | RRP15   | 17.74 | 22.43 | -3.04 | 0.86 | 1.18E-13 |
| I2 | mi Xelaev18007593m.g | rab36.L           | RAB36   | 17.70 | 26.80 | 3.20  | 0.85 | 1.76E-13 |
| I2 | mi Xelaev18041226m.g | bmp4.S            | BMP4    | 17.66 | 17.07 | -6.54 | 0.78 | 3.41E-10 |
| I2 | mi Xelaev18044115m.g | sept9.L           | 40057   | 17.49 | 12.81 | -9.00 | 0.85 | 2.94E-13 |
| I2 | mi Xelaev18020823m.g | sec11a.S          | SEC11A  | 17.28 | 20.36 | 11.63 | 0.74 | 6.66E-09 |
| I2 | mi Xelaev18030656m.g | wdr86.L           | WDR86   | 17.14 | 24.22 | -8.51 | 0.74 | 9.09E-09 |
| I2 | mi Xelaev18046460m.g | ccdc137.S         | CCDC137 | 17.02 | 26.58 | 6.80  | 0.82 | 1.19E-11 |
| I2 | mi Xelaev18021628m.g | Xelaev18021628m.g | N/B     | 16.97 | 27.80 | -5.25 | 0.82 | 9.09E-12 |
| I2 | mi Xelaev18033370m.g | znf622.S          | ZNF622  | 16.95 | 22.45 | 11.91 | 0.78 | 4.17E-10 |
| I2 | mi Xelaev18003402m.g | Xelaev18003402m.g | N/B     | 16.37 | 25.59 | 5.55  | 0.70 | 1.48E-07 |
| I2 | mi Xelaev18030680m.g | nom1.L            | NOM1    | 16.09 | 26.09 | -6.93 | 0.83 | 5.29E-12 |
| I2 | mi Xelaev18047406m.g | wdr75.S           | WDR75   | 15.92 | 36.11 | 7.59  | 0.83 | 4.26E-12 |
| I2 | mi Xelaev18045794m.g | Xelaev18045794m.g | N/B     | 15.71 | 20.32 | -9.28 | 0.81 | 3.07E-11 |
| I2 | mi Xelaev18031827m.g | tubb6.L           | TUBB6   | 15.44 | 30.83 | -0.78 | 0.82 | 7.25E-12 |
| I2 | mi Xelaev18007432m.g | ddx54.L           | DDX54   | 14.65 | 23.14 | -4.39 | 0.83 | 2.33E-12 |
| I2 | mi Xelaev18012601m.g | clic5.L           | CLIC4   | 14.61 | 21.13 | -8.55 | 0.83 | 3.67E-12 |
| I2 | mi Xelaev18021486m.g | pdlim4.S          | PDLIM4  | 13.90 | 30.57 | 6.05  | 0.76 | 2.70E-09 |
| I2 | mi Xelaev18005070m.g | lrpap1.L          | LRPAP1  | 13.86 | 15.79 | -5.07 | 0.69 | 2.44E-07 |
| I2 | mi Xelaev18027150m.g | dse.L             | DSE     | 13.50 | 22.34 | -5.87 | 0.83 | 2.73E-12 |
| I2 | mi Xelaev18003586m.g | aprt.L            | APRT    | 13.12 | 14.46 | 2.05  | 0.84 | 7.11E-13 |
| I2 | mi Xelaev18015116m.g | snrnp40.S         | SNRNP40 | 13.00 | 11.44 | -7.13 | 0.79 | 1.79E-10 |

|    |                      |                   |          |       |       |        |      |          |
|----|----------------------|-------------------|----------|-------|-------|--------|------|----------|
| I2 | mi Xelaev18020405m.g | EIF3J.S           | EIF3J    | 12.99 | 26.39 | 12.51  | 0.91 | 5.55E-18 |
| I2 | mi Xelaev18018994m.g | PPAN.L            | PPAN     | 11.92 | 18.06 | -9.72  | 0.86 | 7.58E-14 |
| I2 | mi Xelaev18025709m.g | NOL12.S           | NOL12    | 11.49 | 25.52 | 5.14   | 0.84 | 1.23E-12 |
| I2 | mi Xelaev18017584m.g | RPAP3.L           | RPAP3    | 10.85 | 15.18 | 3.23   | 0.68 | 4.20E-07 |
| I2 | mi Xelaev18016649m.g | ARFGAP3.L         | ARFGAP3  | 10.77 | 11.47 | -8.76  | 0.70 | 1.55E-07 |
| I3 | mi Xelaev18038249m.g | Xelaev18038249m.g | FCN1     | 78.36 | 43.62 | -4.83  | 0.86 | 6.44E-14 |
| I3 | mi Xelaev18047360m.g | NOP58.S           | NOP58    | 67.94 | 56.45 | 20.50  | 0.97 | 1.08E-27 |
| I3 | mi Xelaev18010203m.g | ROR2.S            | ROR2     | 66.03 | 40.55 | -7.94  | 0.86 | 1.23E-13 |
| I3 | mi Xelaev18044939m.g | NOP58.L           | NOP58    | 63.74 | 58.19 | 17.21  | 0.98 | 3.64E-30 |
| I3 | mi Xelaev18037983m.g | MRTO4.S           | MRTO4    | 61.77 | 51.65 | 10.34  | 0.94 | 4.96E-21 |
| I3 | mi Xelaev18011719m.g | TSR1.L            | TSR1     | 59.88 | 49.37 | 13.21  | 0.96 | 6.43E-24 |
| I3 | mi Xelaev18047541m.g | LFNG.S            | LFNG     | 58.69 | 38.63 | -10.55 | 0.85 | 4.10E-13 |
| I3 | mi Xelaev18034422m.g | NOP2.L            | NOP2     | 56.58 | 53.25 | 9.23   | 0.96 | 1.84E-25 |
| I3 | mi Xelaev18012031m.g | STPG1.L           | STPG1    | 55.39 | 48.55 | -2.87  | 0.87 | 8.77E-15 |
| I3 | mi Xelaev18009119m.g | LRP2BP.S          | LRP2BP   | 54.70 | 47.52 | 5.30   | 0.89 | 7.46E-16 |
| I3 | mi Xelaev18047992m.g | VKORC1L1.S        | VKORC1L1 | 54.58 | 51.61 | 8.28   | 0.93 | 2.73E-20 |
| I3 | mi Xelaev18003168m.g | ABCF2.L           | ABCF2    | 53.23 | 52.09 | 8.44   | 0.94 | 2.59E-21 |
| I3 | mi Xelaev18045175m.g | RSL1D1.L          | RSL1D1   | 52.81 | 47.53 | 8.95   | 0.96 | 3.46E-25 |
| I3 | mi Xelaev18036956m.g | NPM3.S            | NPM3     | 52.21 | 56.22 | 16.59  | 0.95 | 3.53E-23 |
| I3 | mi Xelaev18001058m.g | EIF4A1.S          | EIF4A1   | 51.82 | 53.70 | 17.65  | 0.92 | 5.49E-19 |
| I3 | mi Xelaev18019581m.g | EIF4A1.L          | EIF4A1   | 51.28 | 56.07 | 17.71  | 0.96 | 2.72E-24 |
| I3 | mi Xelaev18012935m.g | PDCL3.L           | PDCL3    | 50.85 | 56.12 | 24.38  | 0.91 | 1.29E-17 |
| I3 | mi Xelaev18030282m.g | C2orf70.S         | C2orf70  | 50.27 | 27.36 | -7.23  | 0.80 | 5.15E-11 |
| I3 | mi Xelaev18022633m.g | UTP4.L            | UTP4     | 50.17 | 51.85 | 17.49  | 0.90 | 1.85E-16 |
| I3 | mi Xelaev18025900m.g | RUVBL1.S          | RUVBL1   | 49.97 | 43.98 | 12.11  | 0.93 | 7.17E-20 |
| I3 | mi Xelaev18005098m.g | WFS1.L            | WFS1     | 49.95 | 45.61 | -10.02 | 0.86 | 6.92E-14 |

|    |                      |                   |         |       |       |        |      |          |
|----|----------------------|-------------------|---------|-------|-------|--------|------|----------|
| I3 | mi Xelaev18045528m.g | tbl3.L            | TBL3    | 49.70 | 49.81 | 1.54   | 0.92 | 8.55E-19 |
| I3 | mi Xelaev18029944m.g | daw1.S            | DAW1    | 48.99 | 37.51 | 1.98   | 0.93 | 1.48E-19 |
| I3 | mi Xelaev18019976m.g | g3bp1.S           | G3BP1   | 48.12 | 49.10 | 12.83  | 0.95 | 7.57E-23 |
| I3 | mi Xelaev18047504m.g | rsl1d1.S          | RSL1D1  | 48.11 | 48.85 | 15.85  | 0.94 | 2.97E-21 |
| I3 | mi Xelaev18022848m.g | katnb1.L          | KATNB1  | 48.11 | 29.47 | -7.15  | 0.84 | 7.55E-13 |
| I3 | mi Xelaev18021116m.g | twf1.S            | TWF1    | 46.93 | 53.59 | 17.39  | 0.88 | 7.97E-15 |
| I3 | mi Xelaev18047357m.g | wdr12.S           | WDR12   | 46.63 | 57.40 | 9.78   | 0.95 | 1.63E-22 |
| I3 | mi Xelaev18007911m.g | kremen1.L         | KREMEN1 | 46.25 | 36.47 | -10.66 | 0.84 | 6.26E-13 |
| I3 | mi Xelaev18003341m.g | Xelaev18003341m.g | HMCN2   | 45.81 | 23.97 | -2.84  | 0.81 | 3.08E-11 |
| I3 | mi Xelaev18032267m.g | cthr1.L           | CTHRC1  | 45.27 | 30.12 | -11.50 | 0.89 | 5.48E-16 |
| I3 | mi Xelaev18003681m.g | nop56.L           | NOP56   | 44.93 | 22.90 | 6.31   | 0.92 | 2.47E-18 |
| I3 | mi Xelaev18029408m.g | syncrip.S         | SYNCRIP | 44.88 | 39.63 | 8.72   | 0.91 | 5.13E-18 |
| I3 | mi Xelaev18017339m.g | nhp2.L            | NHP2    | 44.70 | 38.10 | 1.60   | 0.90 | 8.31E-17 |
| I3 | mi Xelaev18012172m.g | tuba3c.L          | TUBA1C  | 44.48 | 39.07 | 8.95   | 0.90 | 1.94E-16 |
| I3 | mi Xelaev18043830m.g | psme3.L           | PSME3   | 44.43 | 57.51 | 23.25  | 0.95 | 5.50E-23 |
| I3 | mi Xelaev18010570m.g | pus1.S            | PUS1    | 44.22 | 53.87 | 21.03  | 0.93 | 5.63E-20 |
| I3 | mi Xelaev18015006m.g | tuba3c.S          | TUBA3C  | 44.18 | 36.62 | 4.94   | 0.90 | 1.69E-16 |
| I3 | mi Xelaev18036567m.g | fbl.L             | FBL     | 43.91 | 39.70 | 6.51   | 0.89 | 1.23E-15 |
| I3 | mi Xelaev18026809m.g | synj2.L           | SYNJ2   | 43.59 | 30.13 | -8.18  | 0.83 | 4.41E-12 |
| I3 | mi Xelaev18036978m.g | rrp12.S           | RRP12   | 43.58 | 43.06 | -5.31  | 0.88 | 5.79E-15 |
| I3 | mi Xelaev18019137m.g | ddx27.L           | DDX27   | 43.57 | 41.73 | 1.63   | 0.89 | 1.01E-15 |
| I3 | mi Xelaev18032072m.g | mtfr1.L           | MTFR1   | 43.15 | 47.44 | 4.91   | 0.88 | 1.59E-15 |
| I3 | mi Xelaev18011548m.g | mina.L            | RIOX2   | 42.81 | 53.09 | 11.47  | 0.89 | 3.00E-16 |
| I3 | mi Xelaev18021204m.g | xpot.S            | XPOT    | 42.62 | 61.45 | 23.13  | 0.94 | 7.55E-21 |
| I3 | mi Xelaev18026185m.g | diexf.L           | UTP25   | 42.02 | 57.66 | 26.69  | 0.91 | 4.36E-18 |
| I3 | mi Xelaev18038293m.g | surf4.2.L         | SURF4   | 41.99 | 41.07 | 8.79   | 0.93 | 8.88E-20 |

|    |                      |                   |          |       |       |        |      |          |
|----|----------------------|-------------------|----------|-------|-------|--------|------|----------|
| I3 | mi Xelaev18028344m.g | loc100494572.L    | CASR     | 41.92 | 42.08 | -4.61  | 0.82 | 6.00E-12 |
| I3 | mi Xelaev18006244m.g | loc101734868.L    | N/B      | 41.69 | 46.78 | 9.15   | 0.77 | 8.80E-10 |
| I3 | mi Xelaev18023640m.g | polr3h.L          | POLR3H   | 41.53 | 47.86 | 20.35  | 0.86 | 7.42E-14 |
| I3 | mi Xelaev18027871m.g | ankmy1.L          | ANKMY1   | 41.27 | 23.66 | -3.92  | 0.82 | 6.70E-12 |
| I3 | mi Xelaev18016836m.g | g3bp1.L           | G3BP1    | 40.98 | 46.44 | 14.35  | 0.95 | 1.65E-22 |
| I3 | mi Xelaev18047242m.g | dnajc10.S         | DNAJC10  | 40.83 | 51.38 | 13.57  | 0.93 | 3.05E-20 |
| I3 | mi Xelaev18018366m.g | aen.L             | AEN      | 40.67 | 49.98 | 22.19  | 0.88 | 3.56E-15 |
| I3 | mi Xelaev18012537m.g | hdac1.L           | HDAC1    | 40.43 | 34.10 | 5.97   | 0.87 | 1.17E-14 |
| I3 | mi Xelaev18009660m.g | plin3.S           | PLIN3    | 40.20 | 33.43 | -10.89 | 0.84 | 1.21E-12 |
| I3 | mi Xelaev18008374m.g | brix1.L           | BRIX1    | 40.17 | 29.77 | 0.21   | 0.87 | 2.60E-14 |
| I3 | mi Xelaev18016116m.g | kpna3.S           | KPNA3    | 39.80 | 50.46 | 25.85  | 0.92 | 3.40E-18 |
| I3 | mi Xelaev18036415m.g | mrto4.L           | MRTO4    | 39.74 | 44.10 | 5.67   | 0.87 | 2.18E-14 |
| I3 | mi Xelaev18043784m.g | utp18.L           | UTP18    | 39.58 | 51.98 | 27.12  | 0.85 | 2.04E-13 |
| I3 | mi Xelaev18032080m.g | rrs1.L            | RRS1     | 39.49 | 52.42 | 21.44  | 0.94 | 6.60E-22 |
| I3 | mi Xelaev18023834m.g | ifrd2.L           | IFRD2    | 39.42 | 47.10 | 13.77  | 0.90 | 8.79E-17 |
| I3 | mi Xelaev18013330m.g | tuba1c.L          | TUBA1B   | 39.40 | 34.67 | -3.85  | 0.88 | 3.59E-15 |
| I3 | mi Xelaev18045643m.g | dctpp1.L          | DCTPP1   | 38.97 | 47.65 | 6.92   | 0.91 | 1.98E-17 |
| I3 | mi Xelaev18038451m.g | hspa5.L           | N/B      | 38.82 | 49.65 | 18.14  | 0.89 | 1.30E-15 |
| I3 | mi Xelaev18030954m.g | twistnb.L         | TWISTNB  | 38.78 | 42.08 | 8.99   | 0.83 | 3.55E-12 |
| I3 | mi Xelaev18003092m.g | lpin3.L           | LPIN3    | 38.71 | 28.03 | -12.56 | 0.86 | 4.66E-14 |
| I3 | mi Xelaev18011221m.g | rrp1b.L           | RRP1B    | 38.53 | 20.80 | 1.22   | 0.78 | 3.80E-10 |
| I3 | mi Xelaev18047430m.g | Xelaev18047430m.g | ACTB     | 38.44 | 40.88 | 0.18   | 0.84 | 1.38E-12 |
| I3 | mi Xelaev18003076m.g | kiaa1755.L        | KIAA1755 | 38.40 | 36.87 | -14.39 | 0.78 | 3.30E-10 |
| I3 | mi Xelaev18024257m.g | ehd1.S            | EHD1     | 38.16 | 51.77 | 14.33  | 0.85 | 1.95E-13 |
| I3 | mi Xelaev18008929m.g | lyar.S            | LYAR     | 38.10 | 48.58 | 20.11  | 0.91 | 1.68E-17 |
| I3 | mi Xelaev18046924m.g | nifk.S            | NIFK     | 37.99 | 35.84 | 10.16  | 0.94 | 9.42E-21 |

|    |                      |                     |         |       |       |        |      |          |
|----|----------------------|---------------------|---------|-------|-------|--------|------|----------|
| I3 | mi Xelaev18027302m.g | syncrip.L           | SYNCRIP | 37.62 | 39.47 | 8.43   | 0.86 | 1.32E-13 |
| I3 | mi Xelaev18039568m.g | ddx24.L             | DDX24   | 37.57 | 48.50 | 21.74  | 0.91 | 3.13E-17 |
| I3 | mi Xelaev18038075m.g | fbl.S               | FBL     | 37.57 | 37.64 | 0.47   | 0.83 | 3.68E-12 |
| I3 | mi Xelaev18023992m.g | ruvbl1.L            | RUVBL1  | 37.47 | 39.59 | 6.57   | 0.88 | 2.60E-15 |
| I3 | mi Xelaev18030562m.g | loc101732654-like.L | N/B     | 36.52 | 22.28 | -7.44  | 0.76 | 2.12E-09 |
| I3 | mi Xelaev18032567m.g | hgh1.L              | HGH1    | 36.28 | 41.96 | 1.41   | 0.85 | 3.16E-13 |
| I3 | mi Xelaev18033356m.g | nsun2.S             | NSUN2   | 36.26 | 49.12 | 22.64  | 0.93 | 2.54E-19 |
| I3 | mi Xelaev18014473m.g | rrp1b.S             | RRP1B   | 36.25 | 38.06 | 2.54   | 0.89 | 7.24E-16 |
| I3 | mi Xelaev18007760m.g | dhx37.L             | DHX37   | 35.87 | 46.76 | 13.95  | 0.90 | 1.13E-16 |
| I3 | mi Xelaev18018333m.g | c15orf26.L          | CFAP161 | 35.74 | 29.51 | 4.33   | 0.89 | 8.28E-16 |
| I3 | mi Xelaev18033931m.g | dcaf13.S            | DCAF13  | 35.31 | 34.39 | -4.02  | 0.82 | 1.29E-11 |
| I3 | mi Xelaev18044972m.g | ccnyl1.L            | CCNYL1  | 35.31 | 55.11 | 20.07  | 0.88 | 4.70E-15 |
| I3 | mi Xelaev18020970m.g | dnajc2.S            | DNAJC2  | 35.26 | 40.10 | 12.43  | 0.88 | 3.91E-15 |
| I3 | mi Xelaev18019057m.g | farsa.L             | FARSA   | 35.23 | 40.87 | 8.82   | 0.86 | 3.78E-14 |
| I3 | mi Xelaev18031133m.g | cdv3.L              | CDV3    | 35.09 | 44.00 | 10.57  | 0.92 | 1.03E-18 |
| I3 | mi Xelaev18029270m.g | rpf2.S              | RPF2    | 34.91 | 38.66 | 21.80  | 0.81 | 3.05E-11 |
| I3 | mi Xelaev18007951m.g | lmnb1.L             | LMNB1   | 34.61 | 29.74 | 5.55   | 0.82 | 1.53E-11 |
| I3 | mi Xelaev18015103m.g | Xelaev18015103m.g   | CTPS1   | 34.31 | 50.35 | 25.64  | 0.84 | 8.12E-13 |
| I3 | mi Xelaev18003804m.g | kiaa0020.S          | PUM3    | 34.02 | 37.32 | 11.75  | 0.77 | 7.47E-10 |
| I3 | mi Xelaev18020003m.g | etf1.S              | N/B     | 33.97 | 40.52 | 17.74  | 0.86 | 8.05E-14 |
| I3 | mi Xelaev18047985m.g | loc100492292.S      | RNF112  | 33.81 | 14.07 | -11.53 | 0.77 | 7.17E-10 |
| I3 | mi Xelaev18013673m.g | nek5.L              | NEK5    | 33.74 | 37.55 | 8.53   | 0.80 | 1.01E-10 |
| I3 | mi Xelaev18028809m.g | trmt6.S             | TRMT6   | 33.69 | 40.07 | 11.65  | 0.85 | 2.47E-13 |
| I3 | mi Xelaev18025386m.g | tmed5.S             | TMED5   | 33.61 | 34.70 | 2.99   | 0.86 | 1.14E-13 |
| I3 | mi Xelaev18039122m.g | slc39a7.L           | SLC39A7 | 33.26 | 42.92 | 11.03  | 0.89 | 2.92E-16 |
| I3 | mi Xelaev18000775m.g | farsa.S             | FARSA   | 33.00 | 46.39 | 11.90  | 0.88 | 3.88E-15 |

|    |                      |                   |         |       |       |        |      |          |
|----|----------------------|-------------------|---------|-------|-------|--------|------|----------|
| I3 | mi Xelaev18018315m.g | fes.L             | FES     | 32.73 | 28.62 | -11.42 | 0.81 | 2.96E-11 |
| I3 | mi Xelaev18021523m.g | hnrnp1.S          | HNRNP1  | 32.58 | 17.22 | -0.16  | 0.82 | 9.40E-12 |
| I3 | mi Xelaev18033141m.g | stt3b.S           | STT3B   | 32.41 | 37.30 | 9.10   | 0.85 | 1.96E-13 |
| I3 | mi Xelaev18033771m.g | rrs1.S            | RRS1    | 31.92 | 42.13 | 8.44   | 0.85 | 3.89E-13 |
| I3 | mi Xelaev18044371m.g | pdia5.L           | PDIA5   | 31.89 | 42.90 | 9.48   | 0.86 | 6.21E-14 |
| I3 | mi Xelaev18015101m.g | rcc1.S            | RCC1    | 31.83 | 40.96 | 9.79   | 0.87 | 2.21E-14 |
| I3 | mi Xelaev18006547m.g | nans.L            | NANS    | 31.31 | 33.71 | 4.63   | 0.87 | 2.79E-14 |
| I3 | mi Xelaev18039103m.g | mgat1.L           | MGAT1   | 31.14 | 29.97 | -0.09  | 0.84 | 1.14E-12 |
| I3 | mi Xelaev18021200m.g | hmga2.S           | N/B     | 31.09 | 28.98 | -7.65  | 0.85 | 4.61E-13 |
| I3 | mi Xelaev18010734m.g | lmnb1.S           | LMNB1   | 30.89 | 30.22 | 3.57   | 0.84 | 1.11E-12 |
| I3 | mi Xelaev18034964m.g | bms1.L            | BMS1    | 30.85 | 38.70 | 2.30   | 0.72 | 4.67E-08 |
| I3 | mi Xelaev18023430m.g | slc30a7.L         | SLC30A7 | 30.77 | 35.00 | 0.43   | 0.77 | 8.94E-10 |
| I3 | mi Xelaev18014885m.g | bysl.S            | BYSL    | 30.76 | 35.78 | 6.80   | 0.88 | 2.12E-15 |
| I3 | mi Xelaev18031639m.g | Xelaev18031639m.g | PAK1IP1 | 30.49 | 32.74 | 6.39   | 0.84 | 1.18E-12 |
| I3 | mi Xelaev18009841m.g | anp32c.S          | N/B     | 30.45 | 22.11 | 7.51   | 0.81 | 1.91E-11 |
| I3 | mi Xelaev18035020m.g | ftsj3.L           | FTSJ3   | 30.32 | 34.63 | 11.10  | 0.88 | 2.60E-15 |
| I3 | mi Xelaev18025469m.g | slc30a7.S         | SLC30A7 | 30.30 | 45.59 | 4.58   | 0.91 | 7.07E-18 |
| I3 | mi Xelaev18004698m.g | gnl3.L            | GNL3    | 29.78 | 21.72 | -1.43  | 0.81 | 3.18E-11 |
| I3 | mi Xelaev18017622m.g | ifrd1.L           | IFRD1   | 29.73 | 42.23 | 23.58  | 0.84 | 1.39E-12 |
| I3 | mi Xelaev18007038m.g | ngdn.L            | N/B     | 29.65 | 45.77 | 12.41  | 0.89 | 7.01E-16 |
| I3 | mi Xelaev18009518m.g | sdad1.S           | SDAD1   | 29.61 | 36.19 | 13.11  | 0.82 | 1.52E-11 |
| I3 | mi Xelaev18000122m.g | smarca5.L         | SMARCA5 | 29.53 | 37.51 | 8.97   | 0.84 | 1.41E-12 |
| I3 | mi Xelaev18006978m.g | sass6.L           | SASS6   | 29.15 | 45.38 | 10.07  | 0.84 | 5.79E-13 |
| I3 | mi Xelaev18031899m.g | esco1.L           | ESCO1   | 29.05 | 35.28 | -1.71  | 0.87 | 1.05E-14 |
| I3 | mi Xelaev18043750m.g | alyref.L          | ALYREF  | 29.02 | 28.35 | 1.55   | 0.81 | 3.91E-11 |
| I3 | mi Xelaev18029271m.g | amd1.S            | AMD1    | 28.98 | 31.95 | 13.41  | 0.84 | 1.14E-12 |

|    |                      |                   |         |       |       |        |      |          |
|----|----------------------|-------------------|---------|-------|-------|--------|------|----------|
| I3 | mi Xelaev18033191m.g | cdv3.S            | CDV3    | 28.95 | 42.00 | 17.72  | 0.92 | 5.72E-19 |
| I3 | mi Xelaev18011589m.g | cxadr.L           | CXADR   | 28.62 | 13.29 | -7.51  | 0.82 | 1.33E-11 |
| I3 | mi Xelaev18003922m.g | Xelaev18003922m.g | N/B     | 28.53 | 30.21 | -3.31  | 0.82 | 1.38E-11 |
| I3 | mi Xelaev18031358m.g | pdcd6.L           | N/B     | 28.32 | 29.49 | -3.09  | 0.86 | 6.98E-14 |
| I3 | mi Xelaev18009289m.g | naa15.S           | NAA15   | 28.25 | 40.23 | 10.41  | 0.79 | 2.67E-10 |
| I3 | mi Xelaev18044492m.g | abcb6.L           | ABCB6   | 28.21 | 15.91 | -9.68  | 0.81 | 2.66E-11 |
| I3 | mi Xelaev18015210m.g | hdac1.S           | HDAC1   | 28.16 | 36.61 | 11.88  | 0.76 | 2.65E-09 |
| I3 | mi Xelaev18014468m.g | pwp2.S            | PWP2    | 28.05 | 26.11 | -13.47 | 0.69 | 2.06E-07 |
| I3 | mi Xelaev18032934m.g | loc100494509.S    | CFAP69  | 27.98 | 25.31 | -1.41  | 0.79 | 1.50E-10 |
| I3 | mi Xelaev18017924m.g | rbm28.L           | RBM28   | 27.79 | 26.90 | -4.40  | 0.77 | 1.01E-09 |
| I3 | mi Xelaev18023257m.g | arpc5.L           | ARPC5   | 27.71 | 29.59 | 2.82   | 0.83 | 5.03E-12 |
| I3 | mi Xelaev18038552m.g | dkc1.L            | DKC1    | 27.68 | 19.10 | -4.49  | 0.88 | 4.35E-15 |
| I3 | mi Xelaev18026873m.g | cebpb.L           | CEBPZ   | 27.51 | 37.71 | 17.11  | 0.85 | 2.60E-13 |
| I3 | mi Xelaev18042357m.g | ppp5c.S           | PPP5C   | 27.33 | 34.53 | 16.77  | 0.88 | 2.71E-15 |
| I3 | mi Xelaev18024120m.g | loc100491288.L    | N/B     | 27.24 | 32.10 | 0.16   | 0.83 | 4.88E-12 |
| I3 | mi Xelaev18021719m.g | cyp2r1.L          | N/B     | 27.06 | 34.48 | 6.34   | 0.71 | 6.67E-08 |
| I3 | mi Xelaev18005568m.g | naa15.L           | NAA15   | 26.97 | 36.78 | 7.66   | 0.80 | 4.71E-11 |
| I3 | mi Xelaev18010244m.g | prmt5.S           | PRMT5   | 26.83 | 38.01 | 10.45  | 0.86 | 1.43E-13 |
| I3 | mi Xelaev18017974m.g | pstpip1.L         | PSTPIP1 | 26.68 | 12.14 | -9.40  | 0.76 | 1.95E-09 |
| I3 | mi Xelaev18040010m.g | prkd1.L           | PRKD1   | 26.63 | 12.82 | -8.33  | 0.79 | 1.50E-10 |
| I3 | mi Xelaev18016233m.g | zdhhc20.S         | ZDHHC20 | 26.56 | 41.33 | 5.58   | 0.83 | 3.85E-12 |
| I3 | mi Xelaev18034881m.g | nolc1.L           | NOLC1   | 26.56 | 32.35 | 1.71   | 0.73 | 2.14E-08 |
| I3 | mi Xelaev18018167m.g | aqp9.L            | AQP9    | 26.20 | 32.24 | -8.46  | 0.84 | 1.13E-12 |
| I3 | mi Xelaev18025414m.g | pkn2.S            | PKN2    | 26.00 | 32.27 | -3.47  | 0.80 | 5.29E-11 |
| I3 | mi Xelaev18025315m.g | cacybp.S          | CACYBP  | 25.96 | 39.19 | 15.78  | 0.85 | 3.58E-13 |
| I3 | mi Xelaev18000235m.g | prss23.1          | PRSS23  | 25.89 | 24.49 | -11.70 | 0.74 | 8.88E-09 |



|    |                      |            |          |       |       |        |      |          |
|----|----------------------|------------|----------|-------|-------|--------|------|----------|
| I3 | mi Xelaev18001521m.g | ctf1.L     | N/B      | 25.61 | 12.34 | -10.92 | 0.83 | 2.47E-12 |
| I3 | mi Xelaev18003211m.g | akirin1.S  | AKIRIN1  | 25.54 | 27.86 | 5.32   | 0.82 | 5.80E-12 |
| I3 | mi Xelaev18020457m.g | cers3.S    | CERS2    | 25.46 | 23.04 | -7.45  | 0.79 | 1.59E-10 |
| I3 | mi Xelaev18012579m.g | zmpste24.L | ZMPSTE24 | 25.42 | 38.63 | 18.32  | 0.84 | 6.02E-13 |
| I3 | mi Xelaev18009263m.g | smarca5.S  | SMARCA5  | 25.10 | 28.26 | 4.02   | 0.73 | 1.86E-08 |
| I3 | mi Xelaev18012632m.g | cap1.L     | CAP1     | 25.07 | 28.42 | -2.36  | 0.68 | 3.57E-07 |
| I3 | mi Xelaev18038118m.g | abt1.L     | ABT1     | 24.95 | 27.36 | -1.82  | 0.80 | 5.23E-11 |
| I3 | mi Xelaev18019507m.g | plod3.L    | PLOD3    | 24.93 | 13.46 | -10.83 | 0.67 | 7.75E-07 |
| I3 | mi Xelaev18028716m.g | diexf.S    | UTP25    | 24.90 | 34.82 | 5.82   | 0.73 | 1.49E-08 |
| I3 | mi Xelaev18009715m.g | ppp1r3b.S  | PPP1R3B  | 24.75 | 49.66 | 12.13  | 0.85 | 4.46E-13 |
| I3 | mi Xelaev18023869m.g | wdr82.L    | WDR82    | 24.72 | 43.72 | 24.81  | 0.82 | 9.10E-12 |
| I3 | mi Xelaev18011070m.g | txn1.S     | TXNL1    | 24.71 | 26.84 | 4.35   | 0.82 | 6.00E-12 |
| I3 | mi Xelaev18047160m.g | ssb.S      | SSB      | 24.65 | 29.59 | 10.09  | 0.76 | 1.97E-09 |
| I3 | mi Xelaev18032270m.g | dcaf13.L   | DCAF13   | 24.64 | 16.78 | -10.35 | 0.63 | 4.92E-06 |
| I3 | mi Xelaev18039592m.g | vrk1.L     | VRK1     | 24.30 | 38.63 | 8.66   | 0.84 | 9.87E-13 |
| I3 | mi Xelaev18046501m.g | psme3.S    | PSME3    | 23.92 | 51.48 | 26.72  | 0.86 | 9.15E-14 |
| I3 | mi Xelaev18035468m.g | zpr1.L     | ZPR1     | 23.78 | 44.54 | 25.81  | 0.76 | 2.06E-09 |
| I3 | mi Xelaev18047503m.g | thumpd1.S  | THUMPD1  | 23.46 | 21.42 | -1.47  | 0.74 | 7.16E-09 |
| I3 | mi Xelaev18041512m.g | rexo4.S    | REXO4    | 23.40 | 24.56 | -0.89  | 0.83 | 1.94E-12 |
| I3 | mi Xelaev18022859m.g | setd6.L    | SETD6    | 23.09 | 21.21 | 0.54   | 0.79 | 2.04E-10 |
| I3 | mi Xelaev18026273m.g | degs1.L    | DEGS1    | 23.03 | 31.53 | -3.48  | 0.79 | 1.47E-10 |
| I3 | mi Xelaev18025622m.g | uck2.S     | UCK2     | 22.97 | 45.48 | 15.88  | 0.83 | 2.46E-12 |
| I3 | mi Xelaev18013463m.g | tspan31.L  | TSPAN31  | 22.94 | 38.44 | 9.64   | 0.90 | 6.88E-17 |
| I3 | mi Xelaev18040653m.g | nop9.L     | NOP9     | 22.89 | 16.51 | -12.31 | 0.74 | 1.14E-08 |
| I3 | mi Xelaev18002566m.g | susd3.S    | SUSD3    | 22.70 | 23.02 | -5.69  | 0.82 | 6.45E-12 |
| I3 | mi Xelaev18018123m.g | duox1.L    | DUOX1    | 22.47 | 46.12 | 11.93  | 0.76 | 1.82E-09 |

|    |                      |                   |           |       |       |       |      |          |
|----|----------------------|-------------------|-----------|-------|-------|-------|------|----------|
| I3 | mi Xelaev18018301m.g | MGC85180.L        | SLC39A1   | 22.32 | 37.18 | -3.27 | 0.87 | 3.62E-14 |
| I3 | mi Xelaev18017776m.g | dnajc2.L          | DNAJC2    | 22.12 | 38.49 | 13.76 | 0.90 | 1.48E-16 |
| I3 | mi Xelaev18023839m.g | hyal2.L           | HYAL2     | 21.93 | 30.65 | -1.82 | 0.69 | 1.86E-07 |
| I3 | mi Xelaev18032103m.g | orc5.L            | ORC5      | 21.70 | 31.64 | 7.04  | 0.80 | 7.03E-11 |
| I3 | mi Xelaev18016390m.g | acer3.S           | ACER3     | 21.64 | 34.85 | 6.49  | 0.81 | 1.87E-11 |
| I3 | mi Xelaev18032519m.g | bop1.L            | BOP1      | 21.55 | 20.46 | -9.57 | 0.74 | 9.80E-09 |
| I3 | mi Xelaev18005850m.g | nup54.L           | NUP54     | 21.52 | 37.39 | 9.34  | 0.85 | 3.61E-13 |
| I3 | mi Xelaev18046993m.g | gja7.S            | GJC1      | 21.37 | 11.44 | -5.60 | 0.79 | 1.17E-10 |
| I3 | mi Xelaev18025436m.g | mettl13.S         | EEF1AKNMT | 21.30 | 16.86 | -7.37 | 0.78 | 3.96E-10 |
| I3 | mi Xelaev18038092m.g | slc35a2.L         | SLC35A2   | 21.22 | 40.08 | 9.75  | 0.78 | 3.78E-10 |
| I3 | mi Xelaev18039668m.g | c14orf166.L       | RTRAF     | 21.02 | 26.93 | 13.66 | 0.81 | 2.82E-11 |
| I3 | mi Xelaev18039079m.g | rsph6a.L          | RSPH4A    | 20.79 | 23.06 | -5.89 | 0.84 | 1.13E-12 |
| I3 | mi Xelaev18022608m.g | dhx38.L           | DHX38     | 20.56 | 13.84 | -9.71 | 0.72 | 3.15E-08 |
| I3 | mi Xelaev18043820m.g | cant1.L           | CANT1     | 19.96 | 25.01 | 3.03  | 0.76 | 2.10E-09 |
| I3 | mi Xelaev18009899m.g | elavl1.S          | ELAVL1    | 19.78 | 24.71 | 4.33  | 0.68 | 3.24E-07 |
| I3 | mi Xelaev18011526m.g | usp16.L           | USP16     | 19.66 | 28.83 | -5.54 | 0.83 | 5.17E-12 |
| I3 | mi Xelaev18025332m.g | arpc5.S           | ARPC5     | 19.45 | 29.49 | 0.10  | 0.80 | 1.02E-10 |
| I3 | mi Xelaev18045176m.g | rrn3.L            | RRN3      | 19.36 | 26.72 | 3.55  | 0.80 | 7.67E-11 |
| I3 | mi Xelaev18043313m.g | eftud2.L          | EFTUD2    | 19.27 | 15.76 | -5.99 | 0.68 | 4.78E-07 |
| I3 | mi Xelaev18045052m.g | Xelaev18045052m.g | ACTB      | 19.20 | 26.25 | -0.65 | 0.80 | 4.53E-11 |
| I3 | mi Xelaev18039428m.g | timm50.L          | TIMM50    | 18.68 | 40.09 | 19.72 | 0.81 | 2.64E-11 |
| I3 | mi Xelaev18023932m.g | thumpd3.L         | THUMPD3   | 18.61 | 23.19 | -8.64 | 0.77 | 1.25E-09 |
| I3 | mi Xelaev18036612m.g | itrip.S           | ITPRIP    | 18.51 | 19.84 | -5.40 | 0.71 | 6.07E-08 |
| I3 | mi Xelaev18015822m.g | ccdc65.S          | CCDC65    | 18.50 | 27.56 | 0.94  | 0.79 | 1.37E-10 |
| I3 | mi Xelaev18040044m.g | ankrd63.L         | ANKRD63   | 18.43 | 31.78 | 3.61  | 0.62 | 6.10E-06 |
| I3 | mi Xelaev18040547m.g | gpatch4.L         | GPATCH4   | 18.42 | 31.01 | 6.82  | 0.73 | 1.93E-08 |

|    |                      |                   |        |       |       |        |      |          |
|----|----------------------|-------------------|--------|-------|-------|--------|------|----------|
| I3 | mi Xelaev18033736m.g | impad1.S          | IMPAD1 | 18.15 | 41.93 | 26.07  | 0.78 | 6.06E-10 |
| I3 | mi Xelaev18007714m.g | ranbp1.L          | RANBP1 | 18.12 | 21.36 | 3.59   | 0.88 | 7.32E-15 |
| I3 | mi Xelaev18026134m.g | mcf2.L            | N/B    | 17.95 | 31.98 | 4.48   | 0.64 | 2.92E-06 |
| I3 | mi Xelaev18027510m.g | ncbp2.L           | NCBP2  | 17.84 | 22.83 | 7.62   | 0.69 | 2.14E-07 |
| I3 | mi Xelaev18033057m.g | mpp6.S            | MPP6   | 17.72 | 39.98 | 18.16  | 0.73 | 1.38E-08 |
| I3 | mi Xelaev18025907m.g | rpn1.S            | RPN1   | 17.51 | 10.56 | -6.48  | 0.66 | 1.17E-06 |
| I3 | mi Xelaev18027784m.g | sgpp2.L           | SGPP2  | 17.43 | 33.37 | 4.76   | 0.84 | 6.31E-13 |
| I3 | mi Xelaev18005443m.g | ppid.L            | PPID   | 17.36 | 32.39 | 12.78  | 0.83 | 4.68E-12 |
| I3 | mi Xelaev18029091m.g | cebpb.S           | CEBPZ  | 17.27 | 34.36 | 7.70   | 0.80 | 4.73E-11 |
| I3 | mi Xelaev18045048m.g | hspd1.L           | HSPD1  | 17.17 | 33.42 | 20.89  | 0.78 | 6.29E-10 |
| I3 | mi Xelaev18010803m.g | riok2.S           | RIOK2  | 16.66 | 36.80 | 18.30  | 0.87 | 3.63E-14 |
| I3 | mi Xelaev18043324m.g | hexim1.L          | HEXIM1 | 16.56 | 34.55 | 18.94  | 0.83 | 4.90E-12 |
| I3 | mi Xelaev18020212m.g | mak16.S           | MAK16  | 16.42 | 18.97 | -3.48  | 0.67 | 6.64E-07 |
| I3 | mi Xelaev18026559m.g | acoxl.L           | ACOXL  | 16.28 | 38.02 | 4.05   | 0.82 | 1.58E-11 |
| I3 | mi Xelaev18030188m.g | tram2.S           | TRAM2  | 16.19 | 17.46 | -10.78 | 0.82 | 1.54E-11 |
| I3 | mi Xelaev18023514m.g | ttc26.L           | TTC26  | 15.74 | 27.65 | 9.87   | 0.79 | 1.21E-10 |
| I3 | mi Xelaev18008420m.g | txn1.L            | TXNL1  | 15.70 | 20.86 | 0.81   | 0.64 | 2.91E-06 |
| I3 | mi Xelaev18004598m.g | hnrnpa0.L         | N/B    | 15.62 | 10.79 | -2.46  | 0.67 | 5.54E-07 |
| I3 | mi Xelaev18034647m.g | c10orf2.L         | TWNK   | 15.53 | 27.64 | -4.97  | 0.66 | 1.22E-06 |
| I3 | mi Xelaev18012630m.g | Xelaev18012630m.g | EEF1A1 | 15.34 | 20.28 | -9.97  | 0.76 | 1.92E-09 |
| I3 | mi Xelaev18011581m.g | hspa13.L          | HSPA13 | 15.16 | 29.07 | -3.72  | 0.81 | 1.69E-11 |
| I3 | mi Xelaev18044198m.g | wdr16.L           | CFAP52 | 14.83 | 12.45 | -10.70 | 0.74 | 1.08E-08 |
| I3 | mi Xelaev18005238m.g | tmem33.L          | TMEM33 | 14.74 | 32.01 | 14.13  | 0.81 | 3.31E-11 |
| I3 | mi Xelaev18008665m.g | ino80b.S          | INO80B | 14.46 | 22.68 | -3.09  | 0.71 | 6.31E-08 |
| I3 | mi Xelaev18017980m.g | sec11a.L          | SEC11A | 14.34 | 26.01 | 11.59  | 0.71 | 7.53E-08 |
| I3 | mi Xelaev18032488m.g | pycr1.L           | PYCR3  | 13.62 | 24.31 | -0.60  | 0.70 | 9.98E-08 |

|    |                      |                   |          |       |       |        |      |          |
|----|----------------------|-------------------|----------|-------|-------|--------|------|----------|
| I3 | mi Xelaev18015350m.g | nxn.S             | NXN      | 13.25 | 38.92 | 16.25  | 0.77 | 1.22E-09 |
| I3 | mi Xelaev18036162m.g | grwd1.L           | N/B      | 13.08 | 18.20 | -6.07  | 0.58 | 3.10E-05 |
| I3 | mi Xelaev18045338m.g | vwa3a.L           | N/B      | 13.02 | 31.69 | 1.73   | 0.76 | 1.71E-09 |
| I3 | mi Xelaev18018302m.g | pdia3.L           | PDIA3    | 12.98 | 10.95 | -6.45  | 0.72 | 4.94E-08 |
| I3 | mi Xelaev18026612m.g | sec23b.L          | SEC23B   | 12.84 | 24.43 | -0.91  | 0.74 | 8.59E-09 |
| I3 | mi Xelaev18046351m.g | tnfrsf6b.S        | TNFRSF6B | 12.82 | 13.55 | -10.83 | 0.80 | 7.83E-11 |
| I3 | mi Xelaev18013725m.g | hsph1.L           | HSPH1    | 12.81 | 37.59 | 15.19  | 0.83 | 3.86E-12 |
| I3 | mi Xelaev18039070m.g | cd3eap-like.L     | CD3EAP   | 12.50 | 18.92 | -3.61  | 0.80 | 1.08E-10 |
| I3 | mi Xelaev18011747m.g | prkx.L            | PRKX     | 11.69 | 11.12 | -6.76  | 0.61 | 9.09E-06 |
| I3 | mi Xelaev18019094m.g | Xelaev18019094m.g | TRMT1    | 11.66 | 30.76 | -2.23  | 0.71 | 6.53E-08 |
| I3 | mi Xelaev18001385m.g | Xelaev18001385m.g | ZNF568   | 11.47 | 24.82 | 1.66   | 0.78 | 4.29E-10 |
| I3 | mi Xelaev18015944m.g | sp5l.S            | SP5      | 11.35 | 38.83 | 8.22   | 0.83 | 4.44E-12 |
| I3 | mi Xelaev18012419m.g | efhc2.L           | EFHC2    | 11.33 | 30.90 | 4.06   | 0.70 | 1.34E-07 |
| I3 | mi Xelaev18012297m.g | ppil1.L           | PPIL1    | 11.29 | 27.99 | 2.56   | 0.70 | 1.53E-07 |
| I3 | mi Xelaev18039148m.g | tap2.L            | N/B      | 11.10 | 12.59 | -8.18  | 0.71 | 8.81E-08 |
| I3 | mi Xelaev18015713m.g | commd6.S          | COMMD6   | 10.61 | 31.29 | 13.89  | 0.72 | 4.52E-08 |
| I3 | mi Xelaev18047097m.g | prpf40a.S         | PRPF40A  | 10.57 | 14.31 | -4.72  | 0.65 | 1.57E-06 |
| I3 | mi Xelaev18044753m.g | prkra-like.L      | PRKRA    | 10.36 | 10.68 | 6.04   | 0.60 | 1.93E-05 |
| I3 | mi Xelaev18011191m.g | cbs.L             | CBS      | 10.29 | 22.62 | -2.92  | 0.62 | 7.20E-06 |
| D1 | mi Xelaev18035152m.g | vstm4.L           | VSTM4    | 50.44 | 53.90 | 6.47   | 0.93 | 3.30E-20 |
| D1 | mi Xelaev18031536m.g | cdh20.L           | CDH20    | 47.77 | 49.74 | -3.99  | 0.79 | 2.57E-10 |
| D1 | mi Xelaev18039333m.g | loc100145695.L    | CYP2C8   | 47.64 | 41.48 | -5.89  | 0.91 | 3.31E-17 |
| D1 | mi Xelaev18020862m.g | Xelaev18020862m.g | N/B      | 45.99 | 39.37 | -8.65  | 0.87 | 2.62E-14 |
| D1 | mi Xelaev18003091m.g | emilin3.L         | EMILIN3  | 45.97 | 38.72 | -7.50  | 0.95 | 1.80E-23 |
| D1 | mi Xelaev18028060m.g | lpin1.L           | LPIN1    | 42.36 | 45.30 | 15.97  | 0.92 | 3.14E-19 |
| D1 | mi Xelaev18001146m.g | slc25a42.S        | SLC25A42 | 41.85 | 36.92 | -7.27  | 0.85 | 3.33E-13 |

|    |                      |                     |         |       |       |        |      |          |
|----|----------------------|---------------------|---------|-------|-------|--------|------|----------|
| D1 | mi Xelaev18005800m.g | pkd2.L              | PKD2    | 40.13 | 39.26 | -2.19  | 0.75 | 4.71E-09 |
| D1 | mi Xelaev18027475m.g | loc101732807.L      | MASP1   | 39.58 | 46.72 | 2.34   | 0.86 | 8.55E-14 |
| D1 | mi Xelaev18003184m.g | loc100485662.1.L    | FBXL14  | 37.77 | 45.76 | 13.38  | 0.85 | 5.40E-13 |
| D1 | mi Xelaev18012527m.g | eva1b.L             | EVA1B   | 37.38 | 43.17 | -4.14  | 0.82 | 1.47E-11 |
| D1 | mi Xelaev18031781m.g | fam69c.L            | DIPK1C  | 37.25 | 26.59 | -9.97  | 0.78 | 4.50E-10 |
| D1 | mi Xelaev18012669m.g | ulk2.L              | ULK2    | 36.49 | 39.27 | 14.86  | 0.86 | 1.34E-13 |
| D1 | mi Xelaev18024482m.g | loc100497319-like.S | SPSB3   | 36.17 | 47.23 | 11.76  | 0.87 | 2.98E-14 |
| D1 | mi Xelaev18012921m.g | slc5a7.L            | SLC5A7  | 34.80 | 41.95 | 3.25   | 0.74 | 7.83E-09 |
| D1 | mi Xelaev18043291m.g | hdac5.L             | HDAC5   | 34.58 | 46.90 | 29.55  | 0.95 | 8.31E-23 |
| D1 | mi Xelaev18015850m.g | loc100493708.S      | DPP10   | 34.36 | 38.87 | 4.68   | 0.92 | 4.70E-19 |
| D1 | mi Xelaev18031139m.g | acad11.L            | ACAD11  | 33.77 | 47.34 | 13.50  | 0.92 | 1.32E-18 |
| D1 | mi Xelaev18030095m.g | lpin1.S             | LPIN1   | 32.95 | 35.60 | 5.88   | 0.88 | 3.35E-15 |
| D1 | mi Xelaev18032331m.g | loc100493830-like.L | DEPTOR  | 32.93 | 29.81 | -5.57  | 0.83 | 3.49E-12 |
| D1 | mi Xelaev18004854m.g | siglec1.L           | SIGLEC1 | 32.37 | 26.82 | 1.21   | 0.78 | 3.57E-10 |
| D1 | mi Xelaev18015496m.g | slc5a7.S            | SLC5A7  | 32.21 | 22.30 | -9.20  | 0.70 | 1.15E-07 |
| D1 | mi Xelaev18038985m.g | wdr44.L             | WDR44   | 32.00 | 50.60 | 17.06  | 0.84 | 5.58E-13 |
| D1 | mi Xelaev18022382m.g | nfatc3.L            | NFATC3  | 31.94 | 45.93 | 10.06  | 0.78 | 3.50E-10 |
| D1 | mi Xelaev18024044m.g | loc100170549.L      | LAMB1   | 31.76 | 25.51 | -9.62  | 0.88 | 3.01E-15 |
| D1 | mi Xelaev18021159m.g | lgr5.S              | LGR5    | 31.36 | 23.80 | -12.19 | 0.89 | 5.26E-16 |
| D1 | mi Xelaev18036835m.g | fgfr2.S             | FGFR2   | 31.30 | 19.35 | -8.87  | 0.82 | 9.72E-12 |
| D1 | mi Xelaev18005236m.g | limch1.L            | LIMCH1  | 30.42 | 14.94 | -2.08  | 0.87 | 3.05E-14 |
| D1 | mi Xelaev18010571m.g | ulk1.S              | ULK1    | 30.25 | 39.08 | 9.18   | 0.76 | 1.71E-09 |
| D1 | mi Xelaev18026353m.g | Xelaev18026353m.g   | N/B     | 30.09 | 24.18 | -10.60 | 0.85 | 3.23E-13 |
| D1 | mi Xelaev18008865m.g | fgfr3.S             | N/B     | 29.20 | 21.77 | 3.21   | 0.81 | 1.97E-11 |
| D1 | mi Xelaev18010277m.g | sall2.S             | SALL2   | 29.18 | 32.88 | -5.19  | 0.74 | 1.00E-08 |
| D1 | mi Xelaev18033872m.g | tmem67.S            | TMEM67  | 29.07 | 45.16 | 14.76  | 0.75 | 4.07E-09 |

|    |                      |                   |          |       |       |        |      |          |
|----|----------------------|-------------------|----------|-------|-------|--------|------|----------|
| D1 | mi Xelaev18023123m.g | lrrc41.L          | LRRC41   | 28.29 | 19.57 | -10.41 | 0.68 | 4.18E-07 |
| D1 | mi Xelaev18010073m.g | uhrf2.S           | UHRF2    | 28.24 | 42.64 | 10.16  | 0.83 | 3.40E-12 |
| D1 | mi Xelaev18014735m.g | loc100495198.S    | MAOA     | 28.22 | 31.85 | 1.22   | 0.80 | 9.16E-11 |
| D1 | mi Xelaev18043226m.g | hoxb4.L           | HOXB4    | 27.51 | 43.75 | 1.96   | 0.87 | 1.93E-14 |
| D1 | mi Xelaev18039216m.g | vwa7.L            | VWA7     | 27.11 | 41.19 | 3.58   | 0.70 | 1.55E-07 |
| D1 | mi Xelaev18047051m.g | ctdsp1.S          | CTDSP1   | 26.47 | 38.81 | 8.71   | 0.89 | 5.85E-16 |
| D1 | mi Xelaev18033788m.g | ncoa2.S           | NCOA2    | 26.05 | 36.94 | 16.77  | 0.87 | 9.34E-15 |
| D1 | mi Xelaev18006137m.g | prdm8.L           | PRDM8    | 25.51 | 45.89 | 10.63  | 0.80 | 1.02E-10 |
| D1 | mi Xelaev18046711m.g | itgb4.S           | ITGB4    | 24.89 | 33.22 | 14.75  | 0.90 | 3.51E-17 |
| D1 | mi Xelaev18029373m.g | ankrd6.S          | ANKRD6   | 24.77 | 28.62 | -5.20  | 0.82 | 6.61E-12 |
| D1 | mi Xelaev18016494m.g | Xelaev18016494m.g | N/B      | 24.76 | 34.42 | 14.13  | 0.88 | 2.96E-15 |
| D1 | mi Xelaev18025612m.g | rxrg.S            | RXRG     | 24.56 | 43.34 | 5.44   | 0.83 | 5.55E-12 |
| D1 | mi Xelaev18022331m.g | pc.L              | PC       | 24.54 | 13.42 | -7.66  | 0.76 | 1.96E-09 |
| D1 | mi Xelaev18019333m.g | chrne.L           | CHRNE    | 24.38 | 21.36 | -8.03  | 0.84 | 8.80E-13 |
| D1 | mi Xelaev18022002m.g | b4galnt4.L        | B4GALNT4 | 23.46 | 34.62 | 14.81  | 0.92 | 1.30E-18 |
| D1 | mi Xelaev18005591m.g | larp1b.L          | LARP1B   | 22.68 | 47.92 | 18.29  | 0.77 | 7.22E-10 |
| D1 | mi Xelaev18013971m.g | loc100498330.L    | ARAP1    | 22.43 | 36.91 | 0.49   | 0.76 | 1.85E-09 |
| D1 | mi Xelaev18046512m.g | nbr1.S            | NBR1     | 22.26 | 36.64 | 14.86  | 0.74 | 8.16E-09 |
| D1 | mi Xelaev18045284m.g | loc100488925.L    | N/B      | 22.15 | 44.48 | 8.75   | 0.82 | 7.39E-12 |
| D1 | mi Xelaev18008877m.g | mxd4.S            | MXD4     | 21.88 | 33.90 | 8.76   | 0.89 | 8.49E-16 |
| D1 | mi Xelaev18006817m.g | uhrf2.L           | UHRF2    | 21.74 | 23.97 | -8.69  | 0.80 | 7.30E-11 |
| D1 | mi Xelaev18037307m.g | angptl7.S         | ANGPTL7  | 21.24 | 14.67 | -13.01 | 0.74 | 1.29E-08 |
| D1 | mi Xelaev18001815m.g | Xelaev18001815m.g | SLC6A11  | 21.00 | 36.64 | 11.14  | 0.83 | 3.59E-12 |
| D1 | mi Xelaev18029539m.g | clcn2.S           | CLCN2    | 20.98 | 44.10 | 14.89  | 0.65 | 2.18E-06 |
| D1 | mi Xelaev18043645m.g | fam110a.L         | FAM110A  | 20.87 | 31.80 | -2.52  | 0.67 | 5.94E-07 |
| D1 | mi Xelaev18043101m.g | hap1.L            | TRAK1    | 20.80 | 53.80 | 29.31  | 0.88 | 2.07E-15 |

|    |                      |                   |          |       |       |        |      |          |
|----|----------------------|-------------------|----------|-------|-------|--------|------|----------|
| D1 | mi Xelaev18012794m.g | gatsl1.L          | CASTOR2  | 20.69 | 43.98 | 24.49  | 0.80 | 6.53E-11 |
| D1 | mi Xelaev18042742m.g | ankrd34a.S        | ANKRD34A | 19.74 | 11.29 | -2.29  | 0.81 | 3.27E-11 |
| D1 | mi Xelaev18005649m.g | egf.L             | EGF      | 19.61 | 21.10 | -9.48  | 0.82 | 1.42E-11 |
| D1 | mi Xelaev18044845m.g | mreg.L            | MREG     | 19.44 | 30.49 | -2.85  | 0.65 | 1.51E-06 |
| D1 | mi Xelaev18009221m.g | fhdc1.S           | FHDC1    | 19.32 | 16.95 | -8.62  | 0.83 | 2.05E-12 |
| D1 | mi Xelaev18025673m.g | Xelaev18025673m.g | CYP2D6   | 19.30 | 32.00 | 0.75   | 0.71 | 5.10E-08 |
| D1 | mi Xelaev18044615m.g | ly75.L            | LY75     | 19.28 | 22.91 | 1.49   | 0.71 | 7.13E-08 |
| D1 | mi Xelaev18045690m.g | Xelaev18045690m.g | ITGAM    | 19.10 | 15.41 | -9.20  | 0.79 | 1.45E-10 |
| D1 | mi Xelaev18017176m.g | loc101731999.L    | RNF14    | 18.84 | 16.64 | -10.02 | 0.76 | 2.15E-09 |
| D1 | mi Xelaev18042302m.g | wdr44.S           | WDR44    | 18.58 | 35.61 | 5.62   | 0.74 | 9.21E-09 |
| D1 | mi Xelaev18035792m.g | hes5_X1.L         | HES5     | 18.56 | 20.91 | 2.26   | 0.75 | 6.57E-09 |
| D1 | mi Xelaev18039523m.g | foxn3.L           | FOXN3    | 18.42 | 36.13 | 12.25  | 0.84 | 9.66E-13 |
| D1 | mi Xelaev18003717m.g | hhipl1.L          | HHIPL1   | 18.26 | 20.72 | -6.90  | 0.79 | 1.53E-10 |
| D1 | mi Xelaev18025768m.g | rbm5.S            | RBM5     | 17.71 | 21.19 | -9.30  | 0.80 | 4.57E-11 |
| D1 | mi Xelaev18043445m.g | fam65c.L          | RIPOR3   | 17.58 | 48.99 | 21.78  | 0.77 | 6.91E-10 |
| D1 | mi Xelaev18037638m.g | Xelaev18037638m.g | CRYAB    | 17.54 | 41.19 | 16.46  | 0.79 | 2.37E-10 |
| D1 | mi Xelaev18043292m.g | g6pc3.1-like.L    | G6PC3    | 17.36 | 25.52 | -1.38  | 0.71 | 7.03E-08 |
| D1 | mi Xelaev18038851m.g | ids.L             | IDS      | 17.10 | 25.73 | -5.63  | 0.72 | 2.82E-08 |
| D1 | mi Xelaev18023022m.g | Xelaev18023022m.g | MYSM1    | 16.86 | 18.04 | -8.22  | 0.76 | 2.64E-09 |
| D1 | mi Xelaev18013854m.g | sesn3.L           | SESN3    | 16.27 | 27.87 | 1.18   | 0.79 | 1.28E-10 |
| D1 | mi Xelaev18028057m.g | greb1.L           | GREB1    | 16.22 | 28.65 | 6.52   | 0.85 | 5.26E-13 |
| D1 | mi Xelaev18041795m.g | mapkap1.S         | MAPKAP1  | 16.21 | 26.83 | 3.83   | 0.72 | 3.55E-08 |
| D1 | mi Xelaev18045179m.g | c16orf45.L        | C16orf45 | 16.11 | 20.81 | 1.54   | 0.73 | 1.64E-08 |
| D1 | mi Xelaev18001714m.g | dlg5.L            | DLG5     | 16.00 | 30.45 | 9.48   | 0.88 | 6.61E-15 |
| D1 | mi Xelaev18024685m.g | nfatc3.S          | NFATC3   | 15.71 | 38.18 | 23.61  | 0.88 | 5.41E-15 |
| D1 | mi Xelaev18015167m.g | ptpru.S           | PTPRU    | 15.69 | 25.78 | 5.98   | 0.67 | 5.31E-07 |

|    |                      |                   |          |       |       |        |      |          |
|----|----------------------|-------------------|----------|-------|-------|--------|------|----------|
| D1 | mi Xelaev18035985m.g | lipe.L            | LIPE     | 15.68 | 38.53 | 14.79  | 0.74 | 1.21E-08 |
| D1 | mi Xelaev18016866m.g | btbd11.L          | BTBD11   | 15.61 | 16.71 | -8.08  | 0.76 | 1.72E-09 |
| D1 | mi Xelaev18042916m.g | kcnk3.S           | KCNN3    | 15.61 | 21.70 | -3.96  | 0.75 | 3.46E-09 |
| D1 | mi Xelaev18002658m.g | pde4d-like.S      | PDE4D    | 15.58 | 18.77 | -4.04  | 0.61 | 9.55E-06 |
| D1 | mi Xelaev18031238m.g | ccdc129.L         | ITPRID1  | 15.52 | 17.68 | -6.96  | 0.81 | 2.26E-11 |
| D1 | mi Xelaev18044896m.g | map3k13.L         | MAP3K13  | 15.41 | 25.60 | 3.34   | 0.71 | 5.17E-08 |
| D1 | mi Xelaev18018341m.g | arnt2.L           | ARNT2    | 15.40 | 16.78 | -12.07 | 0.71 | 6.77E-08 |
| D1 | mi Xelaev18023628m.g | loc101734319.L    | COLGALT2 | 15.27 | 13.60 | -10.74 | 0.77 | 8.68E-10 |
| D1 | mi Xelaev18045845m.g | loc100145779.S    | BPI      | 15.24 | 15.74 | -9.11  | 0.76 | 2.50E-09 |
| D1 | mi Xelaev18015473m.g | tmem47.S          | TMEM47   | 15.08 | 21.44 | -5.61  | 0.71 | 7.89E-08 |
| D1 | mi Xelaev18005343m.g | fam149a.L         | FAM149A  | 14.74 | 20.98 | 1.16   | 0.84 | 6.02E-13 |
| D1 | mi Xelaev18037110m.g | pald1.S           | PALD1    | 14.72 | 17.71 | -7.49  | 0.77 | 9.14E-10 |
| D1 | mi Xelaev18047579m.g | unkl.S            | UNK      | 14.61 | 33.95 | 9.84   | 0.78 | 2.87E-10 |
| D1 | mi Xelaev18045873m.g | hap1.S            | TRAK1    | 14.53 | 38.27 | 16.05  | 0.86 | 5.12E-14 |
| D1 | mi Xelaev18005528m.g | Xetrov90000949m.L | N/B      | 14.45 | 14.69 | -6.52  | 0.71 | 5.68E-08 |
| D1 | mi Xelaev18009680m.g | bmp2k.S           | BMP2K    | 14.41 | 24.97 | -3.07  | 0.85 | 2.89E-13 |
| D1 | mi Xelaev18034763m.g | Xelaev18034763m.g | HECTD2   | 14.13 | 21.44 | 3.53   | 0.70 | 9.62E-08 |
| D1 | mi Xelaev18026889m.g | lyst.L            | LYST     | 13.43 | 25.70 | 4.13   | 0.84 | 1.17E-12 |
| D1 | mi Xelaev18047744m.g | tsc2.S            | TSC2     | 12.93 | 39.06 | 23.19  | 0.86 | 1.04E-13 |
| D1 | mi Xelaev18002572m.g | Xelaev18002572m.g | SLC6A11  | 12.50 | 28.84 | 16.28  | 0.82 | 6.55E-12 |
| D1 | mi Xelaev18021062m.g | ankrd7.S          | ANKRD26  | 12.08 | 19.25 | -5.09  | 0.79 | 2.41E-10 |
| D1 | mi Xelaev18005700m.g | npnt.L            | NPNT     | 11.94 | 26.82 | -2.05  | 0.84 | 1.79E-12 |
| D1 | mi Xelaev18024345m.g | b4galnt4.S        | B4GALNT4 | 11.89 | 27.18 | 12.72  | 0.89 | 4.24E-16 |
| D1 | mi Xelaev18047537m.g | gprc5b.S          | GPRC5B   | 11.49 | 16.10 | -4.90  | 0.81 | 4.49E-11 |
| D1 | mi Xelaev18029111m.g | sash1.S           | SASH1    | 11.43 | 22.75 | 9.54   | 0.82 | 8.88E-12 |
| D1 | mi Xelaev18039076m.g | Xelaev18039076m.g | NOVA1    | 11.40 | 20.45 | -7.19  | 0.76 | 2.81E-09 |



|    |                      |                   |         |       |       |        |      |          |
|----|----------------------|-------------------|---------|-------|-------|--------|------|----------|
| D1 | mi Xelaev18042375m.g | nova2.S           | NOVA2   | 11.38 | 28.84 | -2.37  | 0.72 | 3.32E-08 |
| D1 | mi Xelaev18036183m.g | loc100497104.L    | N/B     | 11.09 | 27.91 | 2.87   | 0.75 | 4.02E-09 |
| D1 | mi Xelaev18019338m.g | tnfsf12.L         | N/B     | 10.93 | 22.42 | -2.64  | 0.85 | 4.86E-13 |
| D1 | mi Xelaev18030080m.g | hpcal1.S          | HPCAL1  | 10.85 | 27.59 | 0.09   | 0.73 | 1.64E-08 |
| D1 | mi Xelaev18027278m.g | ankrd6.L          | ANKRD6  | 10.84 | 21.33 | 2.94   | 0.74 | 1.14E-08 |
| D1 | mi Xelaev18033574m.g | ldlr4.S           | LDLRAD4 | 10.49 | 26.89 | 7.53   | 0.68 | 4.44E-07 |
| D1 | mi Xelaev18002649m.g | map3k1.S          | MAP3K1  | 10.24 | 26.65 | 15.79  | 0.81 | 2.44E-11 |
| D1 | mi Xelaev18025291m.g | lrp8.S            | LRP8    | 10.10 | 15.73 | 1.41   | 0.74 | 1.27E-08 |
| D2 | mi Xelaev18014320m.g | Xelaev18014320m.g | N/B     | 58.46 | 52.93 | 13.76  | 0.83 | 2.91E-12 |
| D2 | mi Xelaev18025883m.g | klf15.S           | KLF15   | 42.93 | 52.43 | 15.61  | 0.93 | 2.04E-19 |
| D2 | mi Xelaev18035885m.g | loc100135243.L    | SBK1    | 42.00 | 32.22 | -17.42 | 0.78 | 5.15E-10 |
| D2 | mi Xelaev18017258m.g | stk32a.L          | STK32A  | 41.89 | 30.68 | -6.52  | 0.91 | 1.29E-17 |
| D2 | mi Xelaev18023970m.g | klf15.L           | KLF15   | 38.87 | 44.37 | 6.72   | 0.90 | 3.47E-17 |
| D2 | mi Xelaev18038962m.g | lpar4.L           | LPAR4   | 38.65 | 40.51 | -0.63  | 0.84 | 1.28E-12 |
| D2 | mi Xelaev18008611m.g | loc101734599.L    | B3GALT5 | 37.72 | 42.13 | 4.74   | 0.88 | 5.49E-15 |
| D2 | mi Xelaev18005863m.g | ccng2.L           | CCNG2   | 37.71 | 42.35 | 4.32   | 0.89 | 1.37E-15 |
| D2 | mi Xelaev18021817m.g | syt13-like.L      | SYT13   | 37.07 | 38.45 | -10.06 | 0.79 | 1.66E-10 |
| D2 | mi Xelaev18039165m.g | ppt2.L            | N/B     | 36.37 | 44.57 | 7.66   | 0.93 | 2.70E-19 |
| D2 | mi Xelaev18031231m.g | dclk3.L           | DCLK3   | 35.66 | 35.98 | -8.65  | 0.87 | 1.73E-14 |
| D2 | mi Xelaev18017285m.g | kiaa1191.L        | N/B     | 34.92 | 25.24 | -4.43  | 0.79 | 1.29E-10 |
| D2 | mi Xelaev18017356m.g | tcp11l2.L         | TCP11L2 | 34.40 | 58.56 | 29.37  | 0.94 | 7.27E-21 |
| D2 | mi Xelaev18028283m.g | loc100496183.L    | N/B     | 34.29 | 17.83 | -0.73  | 0.80 | 5.63E-11 |
| D2 | mi Xelaev18006161m.g | lpl.L             | LPL     | 34.18 | 24.59 | -3.70  | 0.82 | 7.12E-12 |
| D2 | mi Xelaev18021324m.g | tcp11l2.S         | TCP11L2 | 33.16 | 53.79 | 26.35  | 0.89 | 9.19E-16 |
| D2 | mi Xelaev18006882m.g | klf9.L            | KLF9    | 31.79 | 41.80 | 5.49   | 0.89 | 9.92E-16 |
| D2 | mi Xelaev18007986m.g | cdo1.L            | CDO1    | 31.08 | 35.65 | 3.78   | 0.89 | 2.76E-16 |

|    |                      |                     |          |       |       |        |      |          |
|----|----------------------|---------------------|----------|-------|-------|--------|------|----------|
| D2 | mi Xelaev18032084m.g | sgk3.L              | SGK3     | 30.88 | 54.59 | 24.09  | 0.77 | 8.33E-10 |
| D2 | mi Xelaev18020562m.g | ppip5k1.S           | PIIP5K1  | 30.57 | 28.30 | -5.16  | 0.84 | 1.30E-12 |
| D2 | mi Xelaev18013473m.g | ctdsp2.L            | CTDSP2   | 30.06 | 33.16 | 6.95   | 0.75 | 6.26E-09 |
| D2 | mi Xelaev18035807m.g | uts2.L              | N/B      | 29.91 | 43.23 | 7.11   | 0.80 | 1.15E-10 |
| D2 | mi Xelaev18005208m.g | tlr1.L              | TLR1     | 29.43 | 40.29 | -0.36  | 0.80 | 4.61E-11 |
| D2 | mi Xelaev18027202m.g | sesn1.L             | SESN1    | 29.07 | 41.28 | 7.63   | 0.96 | 2.51E-25 |
| D2 | mi Xelaev18037640m.g | Xelaev18037640m.g   | CRYAB    | 27.99 | 53.59 | 23.01  | 0.89 | 1.49E-15 |
| D2 | mi Xelaev18010535m.g | ypel1.S             | YPEL1    | 27.87 | 32.49 | 2.28   | 0.92 | 5.05E-19 |
| D2 | mi Xelaev18024163m.g | ltbp3.S             | LTBP3    | 27.68 | 53.33 | 24.56  | 0.87 | 1.72E-14 |
| D2 | mi Xelaev18029910m.g | arhgef4.S           | ARHGEF4  | 26.97 | 37.90 | -4.68  | 0.79 | 2.10E-10 |
| D2 | mi Xelaev18023971m.g | aldh1l1.L           | ALDH1L1  | 26.74 | 45.13 | 14.46  | 0.88 | 6.41E-15 |
| D2 | mi Xelaev18003101m.g | sgk2.L              | SGK2     | 26.61 | 27.03 | -3.25  | 0.77 | 6.67E-10 |
| D2 | mi Xelaev18016854m.g | rfx4.L              | RFX4     | 26.35 | 21.11 | -21.18 | 0.76 | 1.71E-09 |
| D2 | mi Xelaev18037836m.g | ppp1r15a.S          | PPP1R15B | 26.10 | 23.29 | -5.29  | 0.77 | 1.10E-09 |
| D2 | mi Xelaev18041740m.g | pfkfb1.S            | PFKFB1   | 25.65 | 42.57 | 19.00  | 0.85 | 1.90E-13 |
| D2 | mi Xelaev18038933m.g | fam46d.L            | TENT5C   | 25.63 | 23.48 | -15.84 | 0.66 | 9.78E-07 |
| D2 | mi Xelaev18010714m.g | slc35e4-like.S      | SLC35E4  | 25.57 | 23.20 | -10.52 | 0.76 | 1.64E-09 |
| D2 | mi Xelaev18035650m.g | mxra8.L             | MXRA8    | 24.82 | 40.41 | 14.93  | 0.83 | 3.60E-12 |
| D2 | mi Xelaev18024353m.g | th.S                | TH       | 24.16 | 29.22 | -4.40  | 0.82 | 8.68E-12 |
| D2 | mi Xelaev18013761m.g | rasl11a.L           | RASL11A  | 23.77 | 24.09 | -11.47 | 0.70 | 1.60E-07 |
| D2 | mi Xelaev18009835m.g | loc100494506-like.S | SLC1A6   | 23.68 | 21.87 | -3.71  | 0.83 | 1.98E-12 |
| D2 | mi Xelaev18027866m.g | klhl24.L            | KLHL24   | 23.47 | 34.95 | 8.49   | 0.87 | 1.45E-14 |
| D2 | mi Xelaev18029287m.g | sesn1.S             | SESN1    | 23.25 | 37.32 | 8.20   | 0.91 | 3.91E-18 |
| D2 | mi Xelaev18015962m.g | ctdsp2.S            | CTDSP2   | 23.08 | 21.97 | 2.90   | 0.62 | 6.03E-06 |
| D2 | mi Xelaev18033707m.g | pcmt1.S             | PCMTD1   | 22.86 | 20.03 | -7.43  | 0.77 | 1.39E-09 |
| D2 | mi Xelaev18044326m.g | tmem37.L            | TMEM37   | 22.84 | 40.93 | 12.45  | 0.88 | 6.85E-15 |

|    |                      |                     |          |       |       |       |      |          |
|----|----------------------|---------------------|----------|-------|-------|-------|------|----------|
| D2 | mi Xelaev18033774m.g | mybl1.S             | MYBL1    | 21.59 | 15.43 | -5.02 | 0.83 | 4.92E-12 |
| D2 | mi Xelaev18010102m.g | Xelaev18010102m.g   | N/B      | 21.22 | 20.37 | -3.88 | 0.84 | 6.03E-13 |
| D2 | mi Xelaev18045133m.g | emp2.L              | EMP2     | 21.06 | 40.17 | 9.12  | 0.86 | 1.07E-13 |
| D2 | mi Xelaev18014677m.g | loc101732226-like.S | ZNF19    | 20.70 | 30.49 | 2.27  | 0.85 | 1.59E-13 |
| D2 | mi Xelaev18039614m.g | loc100189574.L      | HEBP2    | 20.49 | 17.52 | -5.53 | 0.79 | 1.78E-10 |
| D2 | mi Xelaev18023755m.g | MGC75753.L          | BTG1     | 19.51 | 33.65 | 6.69  | 0.73 | 1.36E-08 |
| D2 | mi Xelaev18027839m.g | scly.L              | SCLY     | 19.41 | 19.69 | -4.61 | 0.91 | 1.29E-17 |
| D2 | mi Xelaev18047120m.g | dapl1.S             | DAPL1    | 19.09 | 40.33 | 21.74 | 0.87 | 8.85E-15 |
| D2 | mi Xelaev18008301m.g | fst.L               | FST      | 19.09 | 29.13 | -4.24 | 0.73 | 2.29E-08 |
| D2 | mi Xelaev18026306m.g | adck3.L             | COQ8A    | 18.94 | 35.92 | 8.22  | 0.69 | 2.66E-07 |
| D2 | mi Xelaev18026621m.g | rin2.L              | RIN2     | 18.49 | 26.49 | 11.33 | 0.84 | 8.22E-13 |
| D2 | mi Xelaev18047408m.g | slc40a1.S           | SLC40A1  | 18.01 | 29.54 | 3.86  | 0.76 | 2.63E-09 |
| D2 | mi Xelaev18033912m.g | tp53inp1.S          | TP53INP1 | 17.08 | 15.45 | 5.84  | 0.77 | 7.09E-10 |
| D2 | mi Xelaev18011484m.g | dnajc28.L           | DNAJC28  | 16.95 | 37.06 | 14.21 | 0.81 | 1.77E-11 |
| D2 | mi Xelaev18036115m.g | ppp1r15a.L          | PPP1R15B | 16.47 | 22.47 | -1.91 | 0.86 | 1.47E-13 |
| D2 | mi Xelaev18016207m.g | polr1d.1.S          | POLR1D   | 15.91 | 23.32 | 1.37  | 0.79 | 1.28E-10 |
| D2 | mi Xelaev18035719m.g | ms4a1.L             | MS4A4A   | 15.90 | 32.74 | 12.81 | 0.79 | 1.47E-10 |
| D2 | mi Xelaev18035306m.g | hepacam.L           | HEPACAM  | 15.83 | 19.58 | -8.00 | 0.65 | 2.29E-06 |
| D2 | mi Xelaev18026599m.g | mertk.L             | MERTK    | 15.78 | 26.19 | 3.66  | 0.76 | 2.55E-09 |
| D2 | mi Xelaev18037559m.g | loc100488469.S      | N/B      | 15.63 | 18.86 | -4.08 | 0.76 | 1.72E-09 |
| D2 | mi Xelaev18001911m.g | map1lc3b.S          | N/B      | 15.47 | 21.25 | -0.70 | 0.83 | 2.41E-12 |
| D2 | mi Xelaev18009707m.g | ppp2cb.S            | PPP2CB   | 15.14 | 11.26 | -3.08 | 0.77 | 9.93E-10 |
| D2 | mi Xelaev18001838m.g | Xelaev18001838m.g   | YIPF4    | 15.00 | 31.28 | 8.20  | 0.72 | 2.70E-08 |
| D2 | mi Xelaev18046608m.g | map1lc3a.S          | MAP1LC3A | 14.69 | 19.00 | -0.54 | 0.85 | 4.80E-13 |
| D2 | mi Xelaev18044604m.g | dapl1.L             | DAPL1    | 14.46 | 28.04 | 12.99 | 0.75 | 6.29E-09 |
| D2 | mi Xelaev18039473m.g | irf2bpl.L           | IRF2BPL  | 14.08 | 27.21 | -2.36 | 0.85 | 1.78E-13 |

|    |                      |                   |         |        |       |        |      |          |
|----|----------------------|-------------------|---------|--------|-------|--------|------|----------|
| D2 | mi Xelaev18021216m.g | metap2.S          | METAP2  | 13.83  | 18.31 | -3.10  | 0.85 | 2.52E-13 |
| D2 | mi Xelaev18023731m.g | mpst.L            | MPST    | 13.64  | 19.45 | -3.23  | 0.85 | 1.98E-13 |
| D2 | mi Xelaev18030739m.g | mtpap.L           | MTPAP   | 13.05  | 23.16 | -1.03  | 0.78 | 6.54E-10 |
| D2 | mi Xelaev18024188m.g | npas4.S           | NPAS4   | 13.00  | 25.05 | -14.53 | 0.72 | 2.88E-08 |
| D2 | mi Xelaev18004048m.g | zbtb8a.2.S        | ZBTB8A  | 12.63  | 37.43 | 15.39  | 0.63 | 3.98E-06 |
| D2 | mi Xelaev18043594m.g | pcmt2.L           | PCMTD2  | 12.59  | 38.26 | 12.65  | 0.65 | 1.76E-06 |
| D2 | mi Xelaev18025682m.g | tef.S             | TEF     | 12.48  | 18.88 | 2.06   | 0.86 | 8.09E-14 |
| D2 | mi Xelaev18044077m.g | trim65.L          | TRIM65  | 12.22  | 22.16 | -0.03  | 0.83 | 2.96E-12 |
| D2 | mi Xelaev18024175m.g | loc100124841.S    | N/B     | 12.17  | 10.75 | -8.68  | 0.69 | 2.12E-07 |
| D2 | mi Xelaev18022697m.g | ca5b.L            | CA5B    | 12.07  | 33.33 | 8.88   | 0.70 | 1.11E-07 |
| D2 | mi Xelaev18003216m.g | Xelaev18003216m.g | PNRC2   | 11.61  | 13.20 | -5.49  | 0.85 | 2.86E-13 |
| D2 | mi Xelaev18013866m.g | slc5a7-like.2.L   | SLC5A7  | 11.21  | 22.31 | -3.92  | 0.65 | 1.78E-06 |
| D2 | mi Xelaev18032082m.g | mybl1.L           | MYBL1   | 11.06  | 17.34 | 1.23   | 0.78 | 3.14E-10 |
| D2 | mi Xelaev18039014m.g | mospd1.L          | MOSPD1  | 10.67  | 32.44 | 4.88   | 0.83 | 2.57E-12 |
| D2 | mi Xelaev18041933m.g | loc100489885.S    | CRADD   | 10.45  | 13.17 | -5.57  | 0.73 | 1.49E-08 |
| D2 | mi Xelaev18036227m.g | loc100135223.L    | N/B     | 10.21  | 13.16 | -1.49  | 0.86 | 6.29E-14 |
| D2 | mi Xelaev18023747m.g | pfkfb4.L          | PFKFB4  | 10.17  | 31.73 | 7.22   | 0.72 | 2.73E-08 |
| D2 | mi Xelaev18037799m.g | tbc1d17.S         | TBC1D17 | 10.05  | 25.62 | 7.64   | 0.73 | 1.46E-08 |
| L1 | mi Xelaev18011155m.g | aqp3.S            | AQP3    | 112.09 | 82.27 | -3.25  | 0.95 | 3.08E-23 |
| L1 | mi Xelaev18006478m.g | crlf1.L           | CRLF1   | 105.29 | 68.95 | -8.57  | 0.96 | 2.61E-25 |
| L1 | mi Xelaev18042775m.g | nes.S             | NES     | 70.64  | 58.47 | -0.51  | 0.87 | 1.24E-14 |
| L1 | mi Xelaev18023861m.g | parp3.L           | PARP3   | 68.12  | 52.88 | -9.80  | 0.94 | 9.21E-21 |
| L1 | mi Xelaev18025789m.g | manf.S            | MANF    | 66.57  | 60.65 | 18.63  | 0.98 | 1.91E-30 |
| L1 | mi Xelaev18028048m.g | pdia6.L           | PDIA6   | 65.07  | 61.01 | 20.99  | 0.96 | 6.87E-26 |
| L1 | mi Xelaev18038032m.g | nphs1.S           | NPHS1   | 62.93  | 36.60 | -5.03  | 0.91 | 9.46E-18 |
| L1 | mi Xelaev18019973m.g | ckap4.S           | CKAP4   | 62.09  | 51.94 | -4.55  | 0.96 | 1.82E-24 |

|    |                      |                   |         |       |       |        |      |          |
|----|----------------------|-------------------|---------|-------|-------|--------|------|----------|
| L1 | mi Xelaev18007684m.g | sdf2l1.L          | SDF2L1  | 60.72 | 49.57 | 11.57  | 0.94 | 5.88E-22 |
| L1 | mi Xelaev18030084m.g | pdia6.S           | PDIA6   | 59.65 | 51.55 | 19.36  | 0.90 | 7.77E-17 |
| L1 | mi Xelaev18010529m.g | sdf2l1.S          | SDF2L1  | 58.47 | 54.81 | 14.48  | 0.92 | 6.00E-19 |
| L1 | mi Xelaev18012803m.g | mybbp1a.L         | MYBBP1A | 56.98 | 51.79 | 10.57  | 0.95 | 4.16E-22 |
| L1 | mi Xelaev18013139m.g | dnajc3.L          | DNAJC3  | 56.48 | 49.30 | 3.33   | 0.94 | 7.36E-21 |
| L1 | mi Xelaev18009214m.g | sfrp2.S           | SFRP2   | 56.32 | 51.54 | -4.74  | 0.95 | 4.87E-23 |
| L1 | mi Xelaev18031149m.g | ctnnb1.L          | CTNNB1  | 55.74 | 45.56 | -6.28  | 0.95 | 4.90E-23 |
| L1 | mi Xelaev18010558m.g | pgam5.S           | PGAM5   | 55.57 | 53.91 | 8.59   | 0.96 | 6.89E-25 |
| L1 | mi Xelaev18018667m.g | stc1.L            | STC1    | 55.44 | 49.01 | 4.11   | 0.91 | 2.99E-17 |
| L1 | mi Xelaev18007461m.g | Xelaev18007461m.g | CORO1C  | 55.43 | 54.02 | 12.62  | 0.94 | 5.38E-22 |
| L1 | mi Xelaev18026393m.g | tcte1.L           | TCTE1   | 54.16 | 60.34 | 15.97  | 0.96 | 5.78E-25 |
| L1 | mi Xelaev18021342m.g | nhp2.S            | NHP2    | 54.16 | 49.02 | 14.82  | 0.95 | 2.45E-22 |
| L1 | mi Xelaev18034521m.g | htra1.L           | HTRA1   | 53.01 | 39.37 | -10.82 | 0.94 | 3.93E-21 |
| L1 | mi Xelaev18042298m.g | pls3.S            | PLS3    | 52.44 | 54.25 | 2.71   | 0.94 | 4.73E-21 |
| L1 | mi Xelaev18012073m.g | rcc1.L            | RCC1    | 50.17 | 42.75 | 4.21   | 0.90 | 1.53E-16 |
| L1 | mi Xelaev18025680m.g | Xelaev18025680m.g | RANGAP1 | 49.69 | 52.06 | 13.09  | 0.95 | 4.15E-23 |
| L1 | mi Xelaev18018036m.g | stra6.L           | STRA6   | 49.18 | 24.15 | -6.53  | 0.88 | 7.53E-15 |
| L1 | mi Xelaev18034668m.g | npm3.L            | NPM3    | 48.85 | 53.06 | 15.19  | 0.96 | 1.77E-24 |
| L1 | mi Xelaev18017515m.g | hmga2.L           | N/B     | 48.61 | 36.90 | -9.61  | 0.91 | 1.03E-17 |
| L1 | mi Xelaev18000740m.g | tmed1.S           | TMED1   | 48.43 | 36.15 | -11.08 | 0.85 | 1.51E-13 |
| L1 | mi Xelaev18020849m.g | lmf2.S            | LMF2    | 47.93 | 48.18 | 5.76   | 0.90 | 9.04E-17 |
| L1 | mi Xelaev18039709m.g | rcor1.L           | N/B     | 47.28 | 32.33 | -9.35  | 0.85 | 5.07E-13 |
| L1 | mi Xelaev18017384m.g | hsp90b1.L         | HSP90B1 | 47.25 | 51.72 | 15.43  | 0.94 | 8.75E-21 |
| L1 | mi Xelaev18033843m.g | e2f5.S            | E2F5    | 46.72 | 48.24 | -0.31  | 0.94 | 9.05E-22 |
| L1 | mi Xelaev18007339m.g | Xelaev18007339m.g | N/B     | 46.49 | 45.43 | 13.12  | 0.90 | 3.78E-17 |
| L1 | mi Xelaev18033048m.g | fam126a.S         | FAM126A | 46.41 | 36.54 | -6.10  | 0.87 | 1.23E-14 |

|    |                      |                   |         |       |       |        |      |          |
|----|----------------------|-------------------|---------|-------|-------|--------|------|----------|
| L1 | mi Xelaev18028912m.g | heatr1.S          | HEATR1  | 45.98 | 45.77 | 5.91   | 0.92 | 3.79E-19 |
| L1 | mi Xelaev18006258m.g | kiss1r.L          | KISS1R  | 45.90 | 24.32 | -7.27  | 0.89 | 3.28E-16 |
| L1 | mi Xelaev18042399m.g | mgat1.S           | MGAT1   | 45.56 | 38.68 | -7.73  | 0.92 | 1.97E-18 |
| L1 | mi Xelaev18021202m.g | llph.S            | N/B     | 45.05 | 47.13 | 22.41  | 0.95 | 2.22E-23 |
| L1 | mi Xelaev18027677m.g | slc33a1.L         | SLC33A1 | 44.85 | 51.05 | 11.01  | 0.96 | 2.57E-24 |
| L1 | mi Xelaev18017669m.g | iqub.L            | IQUB    | 44.55 | 58.54 | 8.85   | 0.93 | 5.07E-20 |
| L1 | mi Xelaev18044935m.g | wdr12.L           | WDR12   | 44.48 | 56.83 | 25.05  | 0.96 | 2.79E-24 |
| L1 | mi Xelaev18012647m.g | vmp1.L            | VMP1    | 44.35 | 47.62 | 4.14   | 0.88 | 8.12E-15 |
| L1 | mi Xelaev18023679m.g | Xelaev18023679m.g | RANGAP1 | 44.13 | 51.51 | 14.33  | 0.96 | 9.34E-25 |
| L1 | mi Xelaev18022820m.g | sf3b3.L           | SF3B3   | 44.10 | 34.83 | 5.37   | 0.92 | 1.04E-18 |
| L1 | mi Xelaev18041802m.g | hspa5.S           | N/B     | 44.06 | 55.84 | 22.73  | 0.92 | 1.36E-18 |
| L1 | mi Xelaev18001788m.g | wnt5a.L           | WNT5A   | 43.83 | 28.65 | -7.27  | 0.84 | 5.53E-13 |
| L1 | mi Xelaev18032541m.g | Xelaev18032541m.g | N/B     | 42.93 | 35.79 | -10.79 | 0.88 | 2.70E-15 |
| L1 | mi Xelaev18047772m.g | rnf151.S          | RNF151  | 42.86 | 33.34 | -9.04  | 0.87 | 2.27E-14 |
| L1 | mi Xelaev18024199m.g | Xelaev18024199m.g | N/B     | 42.64 | 53.40 | 20.04  | 0.91 | 1.98E-17 |
| L1 | mi Xelaev18044358m.g | umps.L            | UMPS    | 42.59 | 46.44 | 12.57  | 0.91 | 4.93E-18 |
| L1 | mi Xelaev18006951m.g | fbp1.L            | N/B     | 42.58 | 41.24 | -5.59  | 0.90 | 2.50E-16 |
| L1 | mi Xelaev18005306m.g | ppat.L            | PPAT    | 42.43 | 32.23 | 0.24   | 0.91 | 1.17E-17 |
| L1 | mi Xelaev18003918m.g | Xelaev18003918m.g | PDCD11  | 42.00 | 44.38 | 10.52  | 0.93 | 3.54E-20 |
| L1 | mi Xelaev18043858m.g | loc100494738.L    | MMP2    | 41.33 | 34.61 | -8.12  | 0.84 | 1.63E-12 |
| L1 | mi Xelaev18010951m.g | skiv2l2.S         | MTREX   | 40.77 | 38.75 | 8.82   | 0.91 | 3.93E-18 |
| L1 | mi Xelaev18011482m.g | gart.L            | GART    | 40.76 | 42.69 | 3.46   | 0.91 | 2.10E-17 |
| L1 | mi Xelaev18015282m.g | vmp1.S            | VMP1    | 40.76 | 46.26 | 15.04  | 0.79 | 2.72E-10 |
| L1 | mi Xelaev18015590m.g | f7.S              | F7      | 40.45 | 19.67 | -7.29  | 0.89 | 7.24E-16 |
| L1 | mi Xelaev18018815m.g | ppapdc1b.L        | PLPP5   | 40.05 | 43.70 | -0.27  | 0.91 | 7.05E-18 |
| L1 | mi Xelaev18022647m.g | usp10.L           | USP10   | 39.68 | 48.50 | 22.34  | 0.90 | 5.40E-17 |

|    |                      |                     |         |       |       |       |      |          |
|----|----------------------|---------------------|---------|-------|-------|-------|------|----------|
| L1 | mi Xelaev18005008m.g | polr1a.L            | POLR1A  | 39.45 | 46.64 | 1.90  | 0.90 | 2.36E-16 |
| L1 | mi Xelaev18017001m.g | loc100490380-like.L | WDR55   | 38.57 | 43.21 | 20.74 | 0.85 | 1.82E-13 |
| L1 | mi Xelaev18040743m.g | Xelaev18040743m.g   | RNF213  | 38.44 | 34.94 | -9.89 | 0.88 | 3.83E-15 |
| L1 | mi Xelaev18026206m.g | tmem206.L           | TMEM206 | 37.94 | 38.89 | -0.59 | 0.86 | 1.07E-13 |
| L1 | mi Xelaev18034106m.g | bop1.S              | BOP1    | 37.47 | 25.89 | -9.06 | 0.84 | 1.02E-12 |
| L1 | mi Xelaev18031726m.g | mrs2.L              | MRS2    | 37.38 | 66.02 | 37.69 | 0.87 | 2.69E-14 |
| L1 | mi Xelaev18044297m.g | utp6.L              | UTP6    | 37.25 | 33.68 | 9.70  | 0.92 | 3.29E-18 |
| L1 | mi Xelaev18022627m.g | nip7.L              | NIP7    | 37.15 | 32.54 | 10.29 | 0.91 | 2.05E-17 |
| L1 | mi Xelaev18044030m.g | tmem104.L           | TMEM104 | 36.92 | 38.86 | 1.19  | 0.91 | 9.09E-18 |
| L1 | mi Xelaev18000735m.g | qtrt1.S             | QTRT1   | 36.81 | 44.73 | 7.80  | 0.92 | 4.29E-19 |
| L1 | mi Xelaev18010878m.g | utp15.S             | UTP15   | 36.51 | 51.15 | 23.19 | 0.94 | 7.86E-21 |
| L1 | mi Xelaev18023800m.g | usp4.L              | USP4    | 36.04 | 42.30 | 2.50  | 0.93 | 1.14E-19 |
| L1 | mi Xelaev18017332m.g | tmed9.L             | TMED9   | 35.87 | 37.20 | 12.97 | 0.90 | 7.00E-17 |
| L1 | mi Xelaev18026823m.g | urb2.L              | URB2    | 35.80 | 49.08 | 20.94 | 0.92 | 7.82E-19 |
| L1 | mi Xelaev18001128m.g | ddx49.S             | DDX49   | 35.48 | 39.50 | 5.24  | 0.89 | 1.42E-15 |
| L1 | mi Xelaev18018035m.g | ccdc33.L            | CCDC33  | 35.23 | 15.84 | -6.34 | 0.88 | 2.18E-15 |
| L1 | mi Xelaev18029541m.g | eif4g3-like.S       | EIF4G1  | 35.10 | 45.09 | 7.40  | 0.91 | 1.40E-17 |
| L1 | mi Xelaev18022695m.g | klhdc4.L            | KLHDC4  | 35.08 | 48.45 | 18.05 | 0.74 | 8.52E-09 |
| L1 | mi Xelaev18038561m.g | pih1d3.L            | PIH1D3  | 34.62 | 25.35 | -3.14 | 0.90 | 9.26E-17 |
| L1 | mi Xelaev18011503m.g | urb1.L              | URB1    | 34.52 | 44.16 | 6.81  | 0.90 | 4.52E-17 |
| L1 | mi Xelaev18040474m.g | loc100488012.L      | N/B     | 33.85 | 46.93 | 8.67  | 0.87 | 1.37E-14 |
| L1 | mi Xelaev18015057m.g | ubxn11.S            | UBXN11  | 33.78 | 47.35 | 12.19 | 0.91 | 4.37E-18 |
| L1 | mi Xelaev18035426m.g | hyou1.L             | HYOU1   | 33.68 | 48.92 | 18.34 | 0.95 | 4.75E-22 |
| L1 | mi Xelaev18024088m.g | shq1.L              | SHQ1    | 32.98 | 46.04 | 23.62 | 0.86 | 6.93E-14 |
| L1 | mi Xelaev18030974m.g | nfe2l3.L            | NFE2L3  | 32.92 | 39.42 | 3.64  | 0.88 | 3.22E-15 |
| L1 | mi Xelaev18016185m.g | uspl1.S             | USPL1   | 32.66 | 39.19 | 1.44  | 0.77 | 9.00E-10 |

|    |                      |                     |          |       |       |       |      |          |
|----|----------------------|---------------------|----------|-------|-------|-------|------|----------|
| L1 | mi Xelaev18039997m.g | aqr.L               | AQR      | 32.54 | 38.99 | 3.85  | 0.82 | 7.43E-12 |
| L1 | mi Xelaev18014992m.g | loc100487263.S      | HEATR6   | 32.53 | 34.39 | -1.73 | 0.85 | 2.18E-13 |
| L1 | mi Xelaev18028044m.g | nol10.L             | NOL10    | 32.36 | 19.63 | -0.86 | 0.83 | 3.02E-12 |
| L1 | mi Xelaev18030030m.g | hs6st1.S            | HS6ST1   | 32.31 | 33.35 | 0.65  | 0.92 | 2.90E-18 |
| L1 | mi Xelaev18018031m.g | cd276.L             | CD276    | 32.16 | 44.29 | 3.94  | 0.83 | 3.38E-12 |
| L1 | mi Xelaev18027786m.g | farsb.L             | FARSB    | 32.05 | 47.95 | 9.76  | 0.93 | 2.14E-19 |
| L1 | mi Xelaev18004404m.g | hyou1.S             | HYOU1    | 31.98 | 50.83 | 12.75 | 0.90 | 5.23E-17 |
| L1 | mi Xelaev18014052m.g | serpinh1.L          | SERPINH1 | 31.92 | 43.69 | 15.53 | 0.75 | 4.84E-09 |
| L1 | mi Xelaev18027122m.g | nus1.L              | NUS1P1   | 31.65 | 44.56 | 18.71 | 0.89 | 7.53E-16 |
| L1 | mi Xelaev18036397m.g | rcc2.L              | RCC2     | 31.52 | 23.47 | -5.71 | 0.70 | 1.28E-07 |
| L1 | mi Xelaev18022048m.g | loc100486192.L      | IFITM2   | 31.47 | 11.89 | -8.69 | 0.88 | 2.68E-15 |
| L1 | mi Xelaev18019046m.g | tmed1.L             | TMED1    | 31.43 | 37.92 | 1.35  | 0.85 | 1.55E-13 |
| L1 | mi Xelaev18002185m.g | Xelaev18002185m.g   | N/B      | 31.29 | 36.65 | -3.54 | 0.88 | 4.45E-15 |
| L1 | mi Xelaev18026168m.g | eml4.L              | EML4     | 31.18 | 20.91 | -5.37 | 0.82 | 1.07E-11 |
| L1 | mi Xelaev18033061m.g | nfe2l3.S            | NFE2L3   | 31.18 | 26.82 | -6.81 | 0.78 | 2.98E-10 |
| L1 | mi Xelaev18032107m.g | crispld1.L          | CRISPLD1 | 30.78 | 44.26 | 2.85  | 0.84 | 1.07E-12 |
| L1 | mi Xelaev18006612m.g | loc100491278-like.L | EXOSC3   | 30.77 | 28.81 | 7.76  | 0.88 | 6.11E-15 |
| L1 | mi Xelaev18028225m.g | tram2.L             | TRAM2    | 30.66 | 43.51 | -2.88 | 0.90 | 1.81E-16 |
| L1 | mi Xelaev18002087m.g | Xelaev18002087m.g   | ANKFN1   | 30.61 | 18.00 | -9.23 | 0.81 | 3.91E-11 |
| L1 | mi Xelaev18022218m.g | stip1.L             | STIP1    | 30.48 | 37.57 | 18.10 | 0.86 | 4.17E-14 |
| L1 | mi Xelaev18012860m.g | nup88.L             | NUP88    | 30.46 | 24.60 | -2.91 | 0.77 | 8.29E-10 |
| L1 | mi Xelaev18025804m.g | rrp9.S              | RRP9     | 29.77 | 32.86 | 3.89  | 0.89 | 1.30E-15 |
| L1 | mi Xelaev18005211m.g | fam114a1.L          | FAM114A1 | 29.71 | 38.56 | 18.48 | 0.81 | 4.47E-11 |
| L1 | mi Xelaev18036988m.g | loc100493999-like.S | N/B      | 29.70 | 29.39 | -7.54 | 0.77 | 7.96E-10 |
| L1 | mi Xelaev18039639m.g | Xelaev18039639m.g   | ARF6     | 29.64 | 35.59 | -3.40 | 0.90 | 5.60E-17 |
| L1 | mi Xelaev18030229m.g | efr3b.S             | EFR3B    | 29.54 | 18.11 | -8.89 | 0.83 | 4.77E-12 |



|    |                      |                     |         |       |       |        |      |          |
|----|----------------------|---------------------|---------|-------|-------|--------|------|----------|
| L1 | mi Xelaev18012815m.g | Xelaev18012815m.g   | DERL2   | 29.42 | 27.21 | 2.08   | 0.88 | 3.26E-15 |
| L1 | mi Xelaev18021668m.g | Xelaev18021668m.g   | GTF2H1  | 29.23 | 32.12 | 3.78   | 0.89 | 1.38E-15 |
| L1 | mi Xelaev18040932m.g | thbs3.L             | THBS3   | 29.17 | 27.14 | -6.87  | 0.82 | 6.90E-12 |
| L1 | mi Xelaev18023860m.g | rrp9.L              | RRP9    | 29.00 | 38.07 | 9.86   | 0.90 | 5.42E-17 |
| L1 | mi Xelaev18016536m.g | sfrpx.S             | SFRP2   | 28.97 | 39.04 | 0.02   | 0.74 | 1.09E-08 |
| L1 | mi Xelaev18044872m.g | nme9.L              | NME8    | 27.56 | 35.28 | 8.37   | 0.80 | 7.48E-11 |
| L1 | mi Xelaev18017767m.g | pus7.L              | PUS7    | 27.30 | 40.31 | 14.06  | 0.89 | 9.88E-16 |
| L1 | mi Xelaev18045335m.g | polr3e-like.L       | N/B     | 27.10 | 33.84 | -1.33  | 0.89 | 5.24E-16 |
| L1 | mi Xelaev18013188m.g | cln5.L              | CLN5    | 27.04 | 42.77 | 4.37   | 0.93 | 2.50E-19 |
| L1 | mi Xelaev18022997m.g | alg6.L              | ALG6    | 26.96 | 43.26 | 8.85   | 0.90 | 4.78E-17 |
| L1 | mi Xelaev18029500m.g | lrrc1.S             | LRRC1   | 26.63 | 41.57 | 14.33  | 0.75 | 4.12E-09 |
| L1 | mi Xelaev18036953m.g | dpcd.S              | DPCD    | 26.26 | 23.88 | 7.22   | 0.77 | 1.44E-09 |
| L1 | mi Xelaev18041467m.g | zmynd19.S           | ZMYND19 | 26.01 | 27.75 | 0.66   | 0.86 | 7.12E-14 |
| L1 | mi Xelaev18028844m.g | xrn2.S              | XRN2    | 25.95 | 30.42 | 0.57   | 0.82 | 1.40E-11 |
| L1 | mi Xelaev18007923m.g | loc100493526-like.L | N/B     | 25.79 | 21.67 | -8.27  | 0.76 | 3.15E-09 |
| L1 | mi Xelaev18040345m.g | cers2.L             | CERS2   | 25.66 | 31.65 | 9.76   | 0.72 | 2.66E-08 |
| L1 | mi Xelaev18007453m.g | ficd.L              | FICD    | 25.60 | 21.06 | -7.12  | 0.87 | 1.53E-14 |
| L1 | mi Xelaev18009796m.g | ptbp1.S             | PTBP1   | 25.33 | 42.75 | 2.48   | 0.88 | 4.31E-15 |
| L1 | mi Xelaev18045870m.g | jup.S               | JUP     | 25.25 | 18.78 | -7.07  | 0.63 | 3.85E-06 |
| L1 | mi Xelaev18026710m.g | Xelaev18026710m.g   | N/B     | 25.24 | 25.85 | -8.83  | 0.89 | 3.80E-16 |
| L1 | mi Xelaev18036160m.g | Xelaev18036160m.g   | GPRC5C  | 25.14 | 25.72 | -2.82  | 0.90 | 8.98E-17 |
| L1 | mi Xelaev18021103m.g | dnajb9.S            | DNAJB9  | 25.08 | 46.13 | 17.53  | 0.94 | 5.33E-21 |
| L1 | mi Xelaev18047053m.g | pnkd.S              | PNKD    | 24.79 | 25.10 | -13.07 | 0.85 | 3.34E-13 |
| L1 | mi Xelaev18041513m.g | surf4.2.S           | SURF4   | 24.70 | 33.05 | 2.11   | 0.85 | 4.44E-13 |
| L1 | mi Xelaev18002761m.g | mylip.S             | MYLIP   | 24.68 | 43.63 | 10.88  | 0.82 | 6.60E-12 |
| L1 | mi Xelaev18031586m.g | tubb2b.L            | TUBB2B  | 24.59 | 31.84 | 2.41   | 0.74 | 9.68E-09 |

|    |                      |                     |         |       |       |        |      |          |
|----|----------------------|---------------------|---------|-------|-------|--------|------|----------|
| L1 | mi Xelaev18026477m.g | plek.L              | PLEK    | 24.46 | 16.71 | -8.39  | 0.68 | 4.15E-07 |
| L1 | mi Xelaev18027425m.g | eif4g3-like.L       | EIF4G1  | 24.43 | 39.76 | 7.72   | 0.87 | 8.45E-15 |
| L1 | mi Xelaev18026372m.g | Xelaev18026372m.g   | KCNK5   | 24.43 | 29.40 | 3.37   | 0.58 | 3.21E-05 |
| L1 | mi Xelaev18024857m.g | piezo1.S            | PIEZO1  | 24.15 | 32.85 | -10.28 | 0.90 | 4.32E-17 |
| L1 | mi Xelaev18041210m.g | tmx1.S              | TMX1    | 24.12 | 35.52 | 4.12   | 0.67 | 5.24E-07 |
| L1 | mi Xelaev18022050m.g | loc101733140.L      | IFITM2  | 24.09 | 13.09 | -9.97  | 0.80 | 4.65E-11 |
| L1 | mi Xelaev18013028m.g | chst7.L             | CHST7   | 23.83 | 34.19 | 1.81   | 0.90 | 1.57E-16 |
| L1 | mi Xelaev18001389m.g | Xelaev18001389m.g   | ZNF79   | 23.73 | 12.64 | -6.10  | 0.70 | 9.86E-08 |
| L1 | mi Xelaev18000401m.g | Xelaev18000401m.g   | N/B     | 23.31 | 31.01 | -1.78  | 0.84 | 1.60E-12 |
| L1 | mi Xelaev18045147m.g | txndc11.L           | TXNDC11 | 23.05 | 25.98 | 1.55   | 0.86 | 5.16E-14 |
| L1 | mi Xelaev18005736m.g | Xelaev18005736m.g   | N/B     | 22.75 | 29.30 | -3.56  | 0.80 | 7.10E-11 |
| L1 | mi Xelaev18021012m.g | celsr2.S            | CELSR1  | 22.74 | 16.25 | -5.70  | 0.78 | 6.54E-10 |
| L1 | mi Xelaev18031292m.g | cdk13.L             | CDK13   | 22.57 | 28.48 | -4.25  | 0.81 | 2.61E-11 |
| L1 | mi Xelaev18031895m.g | thoc1.L             | THOC1   | 22.32 | 29.95 | 2.84   | 0.79 | 2.69E-10 |
| L1 | mi Xelaev18028836m.g | smek2.S             | PPP4R3B | 22.25 | 35.19 | 8.47   | 0.84 | 1.48E-12 |
| L1 | mi Xelaev18028984m.g | loc100488558-like.S | FAM98A  | 22.22 | 44.44 | 16.71  | 0.80 | 7.82E-11 |
| L1 | mi Xelaev18029645m.g | b3gnt5.S            | B3GNT5  | 22.13 | 38.15 | 5.24   | 0.81 | 2.68E-11 |
| L1 | mi Xelaev18041214m.g | ptger2.S            | PTGER2  | 21.75 | 23.47 | -10.39 | 0.80 | 6.54E-11 |
| L1 | mi Xelaev18023913m.g | edem1.L             | EDEM1   | 21.74 | 32.42 | 4.44   | 0.76 | 2.29E-09 |
| L1 | mi Xelaev18007775m.g | gtf2h3.L            | GTF2H3  | 21.61 | 30.07 | 6.31   | 0.73 | 2.16E-08 |
| L1 | mi Xelaev18010551m.g | loc100135405.S      | N/B     | 21.49 | 16.04 | -10.22 | 0.84 | 1.41E-12 |
| L1 | mi Xelaev18034423m.g | chd4.L              | CHD4    | 21.43 | 20.71 | -1.93  | 0.72 | 3.18E-08 |
| L1 | mi Xelaev18039542m.g | loc100485426-like.L | PPP4R3A | 21.38 | 37.06 | 5.85   | 0.81 | 1.81E-11 |
| L1 | mi Xelaev18041432m.g | lmo4.2.S            | LMO4    | 21.30 | 16.72 | -7.60  | 0.73 | 1.74E-08 |
| L1 | mi Xelaev18034723m.g | entpd7.L            | ENTPD7  | 21.25 | 45.55 | 15.60  | 0.90 | 1.88E-16 |
| L1 | mi Xelaev18039504m.g | sel1l.L             | SEL1L   | 21.04 | 15.19 | -7.28  | 0.68 | 4.16E-07 |

|    |                      |                   |          |       |       |        |      |          |
|----|----------------------|-------------------|----------|-------|-------|--------|------|----------|
| L1 | mi Xelaev18003334m.g | dolpp1.L          | DOLPP1   | 20.94 | 49.04 | 24.30  | 0.75 | 6.47E-09 |
| L1 | mi Xelaev18018517m.g | mob1a.L           | MOB1A    | 20.93 | 23.48 | -6.64  | 0.71 | 6.28E-08 |
| L1 | mi Xelaev18029123m.g | lats1.S           | LATS1    | 20.88 | 35.94 | 6.11   | 0.88 | 2.04E-15 |
| L1 | mi Xelaev18026376m.g | naglu.L           | NAGLU    | 20.83 | 30.89 | -0.46  | 0.62 | 8.19E-06 |
| L1 | mi Xelaev18015644m.g | zic5.S            | ZIC5     | 20.72 | 24.33 | -6.67  | 0.82 | 6.64E-12 |
| L1 | mi Xelaev18028835m.g | pnpt1.S           | PNPT1    | 20.71 | 40.67 | 10.05  | 0.90 | 4.35E-17 |
| L1 | mi Xelaev18040741m.g | Xelaev18040741m.g | RNF213   | 20.67 | 28.40 | -10.77 | 0.83 | 2.75E-12 |
| L1 | mi Xelaev18009347m.g | gar1.S            | GAR1     | 20.60 | 34.11 | 8.64   | 0.87 | 2.18E-14 |
| L1 | mi Xelaev18013117m.g | zic5.L            | ZIC5     | 20.41 | 23.42 | -7.42  | 0.75 | 4.60E-09 |
| L1 | mi Xelaev18026540m.g | smek2.L           | PPP4R3B  | 20.40 | 30.21 | 7.66   | 0.78 | 3.91E-10 |
| L1 | mi Xelaev18035192m.g | exosc10.L         | EXOSC10  | 20.24 | 22.29 | 0.61   | 0.88 | 4.45E-15 |
| L1 | mi Xelaev18047570m.g | c7orf50.S         | C7orf50  | 20.19 | 11.49 | -11.06 | 0.56 | 7.67E-05 |
| L1 | mi Xelaev18039464m.g | flvcr2.L          | FLVCR2   | 19.99 | 21.11 | -10.44 | 0.84 | 7.51E-13 |
| L1 | mi Xelaev18033858m.g | osgin2.S          | OSGIN2   | 19.88 | 28.97 | 7.22   | 0.83 | 3.10E-12 |
| L1 | mi Xelaev18041545m.g | c9orf116.S        | C9orf116 | 19.77 | 18.43 | -1.78  | 0.65 | 2.21E-06 |
| L1 | mi Xelaev18000838m.g | loc100492804.S    | N/B      | 19.52 | 17.61 | -6.26  | 0.62 | 6.13E-06 |
| L1 | mi Xelaev18013990m.g | hpx.L             | HPX      | 19.42 | 28.21 | -2.45  | 0.83 | 2.00E-12 |
| L1 | mi Xelaev18004340m.g | Xetrov90029205m.L | N/B      | 19.40 | 25.14 | -8.77  | 0.73 | 1.43E-08 |
| L1 | mi Xelaev18045563m.g | shmt1.L           | SHMT1    | 19.39 | 28.84 | -2.67  | 0.64 | 2.48E-06 |
| L1 | mi Xelaev18024901m.g | dhx38.S           | DHX38    | 19.26 | 27.48 | 7.23   | 0.65 | 1.62E-06 |
| L1 | mi Xelaev18014525m.g | baz1b.S           | BAZ1B    | 19.08 | 16.59 | -5.09  | 0.78 | 5.66E-10 |
| L1 | mi Xelaev18018415m.g | chsy1.L           | CHSY1    | 18.95 | 16.82 | -10.10 | 0.75 | 6.21E-09 |
| L1 | mi Xelaev18012140m.g | slc30a2.L         | SLC30A2  | 18.91 | 24.78 | -2.19  | 0.64 | 2.35E-06 |
| L1 | mi Xelaev18017211m.g | lars.L            | LARS     | 18.67 | 38.67 | 11.97  | 0.79 | 1.62E-10 |
| L1 | mi Xelaev18018122m.g | duoxa1.L          | DUOXA1   | 18.62 | 44.90 | 21.18  | 0.68 | 4.48E-07 |
| L1 | mi Xelaev18006698m.g | lpar1.L           | LPAR1    | 18.62 | 40.62 | 14.56  | 0.82 | 1.28E-11 |

|    |                      |                   |          |       |       |        |      |          |
|----|----------------------|-------------------|----------|-------|-------|--------|------|----------|
| L1 | mi Xelaev18041464m.g | nsmf.S            | NSMF     | 18.53 | 29.39 | -2.90  | 0.67 | 8.10E-07 |
| L1 | mi Xelaev18024126m.g | slc25a26.L        | SLC25A26 | 18.42 | 12.46 | -10.63 | 0.86 | 4.14E-14 |
| L1 | mi Xelaev18016352m.g | eed.S             | N/B      | 18.39 | 27.53 | 4.35   | 0.71 | 9.17E-08 |
| L1 | mi Xelaev18034050m.g | chrac1.S          | CHRAC1   | 18.34 | 21.89 | -2.33  | 0.71 | 6.18E-08 |
| L1 | mi Xelaev18044524m.g | slc11a1.L         | SLC11A1  | 18.30 | 15.86 | -7.43  | 0.71 | 5.38E-08 |
| L1 | mi Xelaev18017543m.g | slc35e3.L         | SLC35E3  | 18.18 | 42.23 | 13.65  | 0.74 | 7.39E-09 |
| L1 | mi Xelaev18014150m.g | sdf2.S            | SDF2     | 18.11 | 33.44 | 3.67   | 0.90 | 5.42E-17 |
| L1 | mi Xelaev18008122m.g | rad17.L           | RAD17    | 18.05 | 19.90 | -0.78  | 0.67 | 7.07E-07 |
| L1 | mi Xelaev18031880m.g | myl12b.L          | MYL12A   | 17.81 | 13.15 | -9.08  | 0.87 | 2.49E-14 |
| L1 | mi Xelaev18027676m.g | gmps.L            | GMPS     | 17.69 | 18.87 | -0.32  | 0.87 | 1.34E-14 |
| L1 | mi Xelaev18014492m.g | Xetrov90025900m.S | N/B      | 17.65 | 28.74 | -2.27  | 0.75 | 5.01E-09 |
| L1 | mi Xelaev18008068m.g | sfl1.L            | SLF1     | 17.64 | 33.68 | 19.72  | 0.75 | 4.43E-09 |
| L1 | mi Xelaev18039147m.g | tap1.L            | TAP1     | 17.59 | 26.97 | 0.57   | 0.80 | 6.41E-11 |
| L1 | mi Xelaev18008447m.g | me2.L             | ME2      | 17.49 | 25.56 | -3.72  | 0.79 | 2.25E-10 |
| L1 | mi Xelaev18023179m.g | prpf38a.L         | N/B      | 17.44 | 11.86 | -0.53  | 0.67 | 5.98E-07 |
| L1 | mi Xelaev18016912m.g | gemin5.L          | GEMIN5   | 17.26 | 22.09 | -6.28  | 0.74 | 7.57E-09 |
| L1 | mi Xelaev18022217m.g | fermt3.L          | FERMT3   | 17.24 | 18.61 | -9.45  | 0.64 | 3.06E-06 |
| L1 | mi Xelaev18008050m.g | riok2.L           | RIOK2    | 17.22 | 24.36 | 9.55   | 0.66 | 9.77E-07 |
| L1 | mi Xelaev18038866m.g | cxorf57.L         | RADX     | 17.21 | 13.70 | -9.95  | 0.83 | 2.96E-12 |
| L1 | mi Xelaev18027350m.g | lrrc1.L           | LRRC1    | 17.17 | 30.19 | -3.18  | 0.81 | 3.32E-11 |
| L1 | mi Xelaev18010143m.g | tle1.S            | TLE1     | 17.09 | 19.41 | -7.42  | 0.68 | 4.52E-07 |
| L1 | mi Xelaev18015989m.g | Xelaev18015989m.g | GTF2H4   | 17.02 | 24.52 | 5.14   | 0.74 | 1.13E-08 |
| L1 | mi Xelaev18029775m.g | slc33a1.S         | SLC33A1  | 16.86 | 31.28 | 6.64   | 0.76 | 2.14E-09 |
| L1 | mi Xelaev18030513m.g | Xelaev18030513m.g | N/B      | 16.81 | 11.59 | -5.25  | 0.69 | 2.27E-07 |
| L1 | mi Xelaev18017110m.g | nme5.L            | NME5     | 16.72 | 30.19 | 12.31  | 0.86 | 3.89E-14 |
| L1 | mi Xelaev18020009m.g | larp1.S           | LARP1    | 16.71 | 11.46 | -6.64  | 0.66 | 1.16E-06 |

|    |                      |                   |         |       |       |        |      |          |
|----|----------------------|-------------------|---------|-------|-------|--------|------|----------|
| L1 | mi Xelaev18047232m.g | cwc22.S           | CWC22   | 16.33 | 20.64 | 0.07   | 0.75 | 5.99E-09 |
| L1 | mi Xelaev18031366m.g | ropt1.L           | ROPN1L  | 15.77 | 18.57 | -9.01  | 0.78 | 6.41E-10 |
| L1 | mi Xelaev18021840m.g | fjx1.L            | FJX1    | 15.71 | 14.75 | -9.35  | 0.64 | 3.03E-06 |
| L1 | mi Xelaev18041376m.g | fcf1.S            | FCF1    | 15.64 | 32.65 | 7.13   | 0.68 | 3.62E-07 |
| L1 | mi Xelaev18038244m.g | Xelaev18038244m.g | FCN1    | 15.63 | 12.21 | -11.96 | 0.66 | 1.08E-06 |
| L1 | mi Xelaev18024056m.g | loc100158544.L    | TTLL3   | 15.59 | 13.29 | -11.60 | 0.71 | 5.46E-08 |
| L1 | mi Xelaev18046938m.g | eaf2.S            | EAF2    | 15.53 | 12.47 | -6.91  | 0.75 | 6.36E-09 |
| L1 | mi Xelaev18008384m.g | tars.L            | TARS    | 15.26 | 27.37 | 1.57   | 0.72 | 2.98E-08 |
| L1 | mi Xelaev18041863m.g | pdcl.S            | PDCL    | 15.17 | 26.25 | 12.68  | 0.76 | 2.61E-09 |
| L1 | mi Xelaev18034885m.g | sec24d-like.2.L   | SEC24C  | 14.93 | 18.49 | -7.35  | 0.82 | 1.57E-11 |
| L1 | mi Xelaev18009192m.g | ppid.S            | PPID    | 14.88 | 28.19 | 11.49  | 0.66 | 9.37E-07 |
| L1 | mi Xelaev18033985m.g | der1.S            | DERL1   | 14.78 | 12.91 | -10.27 | 0.66 | 9.66E-07 |
| L1 | mi Xelaev18018637m.g | ddx56.L           | DDX56   | 14.77 | 25.99 | -1.23  | 0.74 | 9.34E-09 |
| L1 | mi Xelaev18017314m.g | znf346.L          | ZNF346  | 14.55 | 35.30 | 9.36   | 0.86 | 5.65E-14 |
| L1 | mi Xelaev18032226m.g | pop1-like.L       | POP1    | 14.47 | 11.49 | -11.25 | 0.60 | 1.74E-05 |
| L1 | mi Xelaev18011076m.g | loc100485773.S    | N/B     | 14.42 | 13.99 | -9.68  | 0.70 | 1.02E-07 |
| L1 | mi Xelaev18025038m.g | znhit6.S          | ZNHIT6  | 14.27 | 19.05 | -3.61  | 0.83 | 5.00E-12 |
| L1 | mi Xelaev18021021m.g | creld2.S          | CRELD2  | 14.27 | 26.33 | -3.35  | 0.66 | 1.02E-06 |
| L1 | mi Xelaev18014718m.g | loc100489793.S    | SLC19A2 | 14.21 | 27.33 | 4.27   | 0.79 | 1.25E-10 |
| L1 | mi Xelaev18012002m.g | nras.L            | NRAS    | 14.00 | 42.05 | 16.91  | 0.74 | 1.26E-08 |
| L1 | mi Xelaev18031308m.g | alg2.L            | ALG2    | 13.96 | 10.53 | -7.04  | 0.73 | 1.69E-08 |
| L1 | mi Xelaev18000497m.g | wdr3.S            | WDR3    | 13.93 | 25.13 | 7.99   | 0.82 | 8.10E-12 |
| L1 | mi Xelaev18033482m.g | nup153.S          | NUP153  | 13.91 | 11.15 | -4.90  | 0.74 | 1.30E-08 |
| L1 | mi Xelaev18024984m.g | katnb1.S          | KATNB1  | 13.84 | 22.38 | -4.73  | 0.81 | 2.45E-11 |
| L1 | mi Xelaev18045065m.g | ptcd1.L           | PTCD1   | 13.78 | 29.11 | 12.31  | 0.73 | 2.31E-08 |
| L1 | mi Xelaev18028379m.g | ccdc25.L          | CCDC25  | 13.64 | 20.90 | 5.20   | 0.61 | 1.26E-05 |

|    |                      |                   |           |       |       |        |      |          |
|----|----------------------|-------------------|-----------|-------|-------|--------|------|----------|
| L1 | mi Xelaev18008242m.g | dimt1.L           | DIMT1     | 13.55 | 18.08 | 4.77   | 0.69 | 2.64E-07 |
| L1 | mi Xelaev18011462m.g | setd4.L           | SETD4     | 13.54 | 21.17 | -3.87  | 0.62 | 8.40E-06 |
| L1 | mi Xelaev18012614m.g | zbtb8a.1.L        | ZBTB8A    | 13.48 | 35.38 | 8.61   | 0.76 | 2.66E-09 |
| L1 | mi Xelaev18003356m.g | Xelaev18003356m.g | HMCN2     | 13.00 | 26.11 | 1.31   | 0.78 | 4.39E-10 |
| L1 | mi Xelaev18024915m.g | utp4.S            | UTP4      | 12.67 | 13.88 | -9.17  | 0.68 | 4.58E-07 |
| L1 | mi Xelaev18014935m.g | pigw.S            | PIGW      | 12.63 | 31.12 | 8.86   | 0.88 | 3.87E-15 |
| L1 | mi Xelaev18008627m.g | loc100490559.L    | ZNF329    | 12.57 | 32.11 | 9.93   | 0.86 | 8.68E-14 |
| L1 | mi Xelaev18047317m.g | adprh.S           | ADPRH     | 12.50 | 25.99 | -2.79  | 0.78 | 3.76E-10 |
| L1 | mi Xelaev18036059m.g | bcl2l12.L         | BCL2L12   | 12.36 | 12.53 | -10.24 | 0.54 | 1.35E-04 |
| L1 | mi Xelaev18038479m.g | lhx6.L            | LHX6      | 12.31 | 37.86 | 12.85  | 0.85 | 2.16E-13 |
| L1 | mi Xelaev18014199m.g | tbl2.S            | TBL2      | 12.31 | 12.04 | -6.08  | 0.75 | 5.45E-09 |
| L1 | mi Xelaev18044061m.g | tsen54.L          | TSEN54    | 12.29 | 27.91 | 2.61   | 0.81 | 2.07E-11 |
| L1 | mi Xelaev18012036m.g | akirin1.L         | AKIRIN1   | 12.21 | 29.10 | 8.06   | 0.86 | 6.37E-14 |
| L1 | mi Xelaev18038719m.g | c1galt1c1.L       | C1GALT1C1 | 12.14 | 38.89 | 12.03  | 0.78 | 3.74E-10 |
| L1 | mi Xelaev18031220m.g | c7orf72.L         | SPATA48   | 12.13 | 14.00 | -7.49  | 0.70 | 1.43E-07 |
| L1 | mi Xelaev18028790m.g | chac2.S           | CHAC2     | 12.12 | 27.45 | 0.66   | 0.75 | 3.54E-09 |
| L1 | mi Xelaev18022850m.g | ccdc135.L         | DRC7      | 12.11 | 22.15 | -4.05  | 0.84 | 9.65E-13 |
| L1 | mi Xelaev18030828m.g | slc25a40.L        | SLC25A40  | 12.09 | 37.87 | 9.62   | 0.81 | 4.45E-11 |
| L1 | mi Xelaev18044423m.g | cxcr2.L           | CXCR1     | 12.00 | 14.36 | -7.84  | 0.67 | 7.83E-07 |
| L1 | mi Xelaev18015219m.g | kpna6.S           | KPNA6     | 11.97 | 29.17 | -0.82  | 0.76 | 2.65E-09 |
| L1 | mi Xelaev18046900m.g | loc100492872.S    | MARCO     | 11.88 | 13.09 | -9.37  | 0.56 | 6.55E-05 |
| L1 | mi Xelaev18038219m.g | dph7.L            | DPH7      | 11.76 | 10.95 | -10.79 | 0.71 | 6.76E-08 |
| L1 | mi Xelaev18012070m.g | Xelaev18012070m.g | CTPS1     | 11.74 | 16.80 | -7.59  | 0.84 | 8.03E-13 |
| L1 | mi Xelaev18018051m.g | snupn.L           | SNUPN     | 11.69 | 16.98 | -5.20  | 0.66 | 8.55E-07 |
| L1 | mi Xelaev18009070m.g | tmem165.S         | TMEM165   | 11.68 | 30.76 | 3.92   | 0.86 | 7.50E-14 |
| L1 | mi Xelaev18029785m.g | p2ry1.S           | P2RY1     | 11.65 | 33.24 | 9.50   | 0.69 | 2.05E-07 |

|    |                      |                   |        |       |       |        |      |          |
|----|----------------------|-------------------|--------|-------|-------|--------|------|----------|
| L1 | mi Xelaev18038250m.g | Xelaev18038250m.g | FCN1   | 11.43 | 14.18 | -5.54  | 0.62 | 7.16E-06 |
| L1 | mi Xelaev18047585m.g | dnaaf5.S          | DNAAF5 | 11.43 | 28.74 | -2.72  | 0.73 | 2.20E-08 |
| L1 | mi Xelaev18046995m.g | loc100495096.S    | MYO10  | 11.24 | 18.06 | -5.04  | 0.64 | 2.64E-06 |
| L1 | mi Xelaev18024803m.g | dnaaf1.S          | DNAAF1 | 11.23 | 16.04 | -9.89  | 0.66 | 1.06E-06 |
| L1 | mi Xelaev18013968m.g | Xelaev18013968m.g | N/B    | 11.13 | 32.44 | 4.32   | 0.76 | 2.10E-09 |
| L1 | mi Xelaev18032016m.g | lypla1.L          | N/B    | 11.07 | 20.73 | -0.84  | 0.79 | 1.36E-10 |
| L1 | mi Xelaev18026468m.g | snrpb2.L          | SNRPB2 | 10.94 | 11.83 | -4.60  | 0.68 | 4.55E-07 |
| L1 | mi Xelaev18010783m.g | man2a1.S          | MAN2A1 | 10.89 | 19.77 | -10.84 | 0.82 | 1.21E-11 |
| L1 | mi Xelaev18007728m.g | noc4l.L           | NOC4L  | 10.71 | 11.65 | -5.53  | 0.70 | 1.45E-07 |
| L1 | mi Xelaev18043168m.g | stard3.L          | STARD3 | 10.65 | 19.14 | -2.75  | 0.78 | 4.80E-10 |
| L1 | mi Xelaev18023258m.g | ncf2.L            | NCF2   | 10.61 | 11.14 | -9.89  | 0.68 | 4.46E-07 |
| L1 | mi Xelaev18021942m.g | agbl2.L           | AGBL2  | 10.55 | 19.10 | -5.35  | 0.85 | 2.91E-13 |
| L1 | mi Xelaev18041480m.g | Xelaev18041480m.g | FCN1   | 10.47 | 19.43 | -0.68  | 0.76 | 1.77E-09 |
| L1 | mi Xelaev18038245m.g | Xelaev18038245m.g | FCN1   | 10.37 | 17.42 | -5.44  | 0.59 | 2.79E-05 |
| L1 | mi Xelaev18046162m.g | tmem189.S         | N/B    | 10.27 | 29.76 | 14.25  | 0.63 | 5.57E-06 |
| L1 | mi Xelaev18015491m.g | ranbp2.S          | RANBP2 | 10.16 | 22.58 | -0.34  | 0.74 | 6.99E-09 |
| L1 | mi Xelaev18011918m.g | cluh.L            | CLUH   | 10.08 | 29.40 | 8.35   | 0.76 | 1.53E-09 |
| L2 | mi Xelaev18040537m.g | nes.L             | NES    | 52.65 | 40.40 | -1.94  | 0.89 | 9.13E-16 |
| L2 | mi Xelaev18007012m.g | ipo4.L            | IPO4   | 51.95 | 53.80 | 19.51  | 0.97 | 5.19E-28 |
| L2 | mi Xelaev18016936m.g | ctnna1.L          | CTNNA1 | 47.21 | 59.19 | 22.46  | 0.95 | 2.85E-22 |
| L2 | mi Xelaev18026661m.g | mtr.L             | MTR    | 47.00 | 59.25 | 22.16  | 0.88 | 6.17E-15 |
| L2 | mi Xelaev18016659m.g | wnt7b.L           | WNT7B  | 46.48 | 36.47 | -7.07  | 0.95 | 4.35E-22 |
| L2 | mi Xelaev18027711m.g | serp2.L           | SERP1  | 46.15 | 38.90 | 11.83  | 0.92 | 1.06E-18 |
| L2 | mi Xelaev18046040m.g | fzd2.S            | FZD2   | 45.83 | 38.42 | -8.83  | 0.85 | 5.31E-13 |
| L2 | mi Xelaev18044267m.g | kpna2.L           | KPNA2  | 45.79 | 23.11 | -3.89  | 0.91 | 9.96E-18 |
| L2 | mi Xelaev18023833m.g | sema3b.L          | SEMA3B | 45.00 | 50.18 | 2.14   | 0.93 | 2.67E-20 |

|    |                      |               |         |       |       |        |      |          |
|----|----------------------|---------------|---------|-------|-------|--------|------|----------|
| L2 | mi Xelaev18017940m.g | lmf2.L        | LMF2    | 44.03 | 53.38 | 15.98  | 0.96 | 1.19E-24 |
| L2 | mi Xelaev18031847m.g | apcdd1.L      | APCDD1  | 43.74 | 51.69 | 22.87  | 0.95 | 3.75E-23 |
| L2 | mi Xelaev18022815m.g | rarg-like.2.L | EXOSC6  | 42.82 | 47.09 | 17.00  | 0.97 | 2.61E-26 |
| L2 | mi Xelaev18032592m.g | abcf2.S       | ABCF2   | 42.39 | 45.17 | 6.46   | 0.96 | 2.59E-25 |
| L2 | mi Xelaev18010467m.g | mlec.S        | MLEC    | 42.09 | 38.66 | 5.30   | 0.90 | 8.95E-17 |
| L2 | mi Xelaev18003611m.g | tram1.L       | TRAM1   | 41.81 | 54.31 | 13.13  | 0.94 | 3.95E-21 |
| L2 | mi Xelaev18008012m.g | wdr36.L       | WDR36   | 40.56 | 46.10 | 17.42  | 0.96 | 1.68E-25 |
| L2 | mi Xelaev18043274m.g | fzd2.L        | FZD2    | 38.57 | 35.80 | -7.58  | 0.90 | 8.00E-17 |
| L2 | mi Xelaev18043969m.g | rbl1.L        | RBL1    | 37.81 | 32.83 | -1.67  | 0.85 | 2.51E-13 |
| L2 | mi Xelaev18017912m.g | flnc.L        | FLNC    | 36.63 | 19.21 | -5.90  | 0.90 | 4.53E-17 |
| L2 | mi Xelaev18021625m.g | dnmt1.S       | DNMT1   | 36.55 | 42.59 | 10.31  | 0.95 | 3.13E-22 |
| L2 | mi Xelaev18006078m.g | mfsd12.L      | MFSD12  | 36.45 | 31.78 | -12.79 | 0.95 | 3.41E-22 |
| L2 | mi Xelaev18012403m.g | ddx3x.L       | DDX3X   | 36.36 | 55.67 | 28.56  | 0.91 | 4.04E-18 |
| L2 | mi Xelaev18037693m.g | cd37.S        | CD37    | 36.25 | 36.83 | -7.01  | 0.92 | 3.15E-19 |
| L2 | mi Xelaev18026709m.g | mthfd1l.L     | MTHFD1L | 36.24 | 36.94 | -1.81  | 0.91 | 1.38E-17 |
| L2 | mi Xelaev18028539m.g | slc35b2.S     | SLC35B2 | 35.96 | 27.81 | -8.92  | 0.97 | 1.78E-26 |
| L2 | mi Xelaev18037434m.g | timm8b.S      | TIMM8B  | 35.88 | 42.85 | 21.40  | 0.92 | 3.46E-19 |
| L2 | mi Xelaev18010452m.g | pxn.S         | PXN     | 34.45 | 38.39 | -8.56  | 0.92 | 4.73E-19 |
| L2 | mi Xelaev18039126m.g | wdr46.L       | WDR46   | 34.22 | 36.73 | 13.23  | 0.91 | 4.34E-18 |
| L2 | mi Xelaev18021623m.g | p2ry11.S      | P2RY1   | 32.79 | 21.95 | 1.44   | 0.90 | 1.95E-16 |
| L2 | mi Xelaev18045954m.g | kpnb1.S       | KPNB1   | 32.37 | 33.89 | -1.77  | 0.98 | 1.09E-29 |
| L2 | mi Xelaev18039478m.g | pomt2.L       | N/B     | 31.25 | 43.67 | 15.17  | 0.92 | 5.01E-19 |
| L2 | mi Xelaev18005668m.g | arsj.L        | ARSJ    | 30.58 | 11.04 | -7.05  | 0.75 | 6.11E-09 |
| L2 | mi Xelaev18008328m.g | fbxo4.L       | FBXO4   | 29.39 | 36.40 | -1.93  | 0.88 | 3.42E-15 |
| L2 | mi Xelaev18018975m.g | atp13a1.L     | ATP13A1 | 28.94 | 29.89 | -5.37  | 0.95 | 7.68E-23 |
| L2 | mi Xelaev18041183m.g | rcor1.S       | N/B     | 27.93 | 14.46 | -9.43  | 0.85 | 2.67E-13 |



|    |                      |                   |         |       |       |        |      |          |
|----|----------------------|-------------------|---------|-------|-------|--------|------|----------|
| L2 | mi Xelaev18026274m.g | nvl.L             | NVL     | 27.63 | 30.55 | -0.06  | 0.80 | 9.17E-11 |
| L2 | mi Xelaev18023843m.g | zmynd10.L         | ZMYND10 | 27.14 | 21.92 | -7.62  | 0.87 | 2.15E-14 |
| L2 | mi Xelaev18000054m.g | prpf19.L          | PRPF19  | 26.84 | 43.05 | 14.25  | 0.97 | 3.48E-27 |
| L2 | mi Xelaev18011090m.g | mex3c.S           | MEX3C   | 26.41 | 34.44 | 4.17   | 0.88 | 1.84E-15 |
| L2 | mi Xelaev18046582m.g | src.S             | SRC     | 26.39 | 43.91 | 3.94   | 0.91 | 2.12E-17 |
| L2 | mi Xelaev18043196m.g | kpnb1.L           | KPNB1   | 26.11 | 28.63 | 0.97   | 0.95 | 7.42E-23 |
| L2 | mi Xelaev18012547m.g | kpna6.L           | KPNA6   | 25.91 | 20.15 | -4.52  | 0.90 | 3.53E-17 |
| L2 | mi Xelaev18013148m.g | sox21.L           | SOX21   | 25.24 | 17.51 | -2.82  | 0.72 | 3.93E-08 |
| L2 | mi Xelaev18027990m.g | uggt1-like.L      | UGGT1   | 24.52 | 19.41 | -4.72  | 0.88 | 7.37E-15 |
| L2 | mi Xelaev18014599m.g | gla.S             | N/B     | 24.15 | 19.00 | -13.61 | 0.90 | 5.21E-17 |
| L2 | mi Xelaev18026413m.g | slc35b2.L         | SLC35B2 | 23.96 | 27.17 | -0.96  | 0.92 | 6.66E-19 |
| L2 | mi Xelaev18016734m.g | Xelaev18016734m.g | TULP3   | 23.71 | 14.44 | -10.21 | 0.85 | 5.30E-13 |
| L2 | mi Xelaev18044377m.g | slc15a2.L         | SLC15A2 | 23.66 | 42.55 | 5.31   | 0.89 | 4.78E-16 |
| L2 | mi Xelaev18029741m.g | kpna4.S           | KPNA4   | 23.41 | 30.39 | 5.60   | 0.96 | 1.69E-25 |
| L2 | mi Xelaev18006924m.g | tle1.L            | TLE1    | 23.22 | 30.34 | 5.09   | 0.93 | 1.89E-19 |
| L2 | mi Xelaev18035353m.g | srpra.L           | SRPRA   | 22.54 | 45.11 | 10.74  | 0.92 | 6.68E-19 |
| L2 | mi Xelaev18012685m.g | por.L             | POR     | 22.34 | 25.40 | 4.85   | 0.83 | 5.06E-12 |
| L2 | mi Xelaev18015148m.g | ncdn.S            | NCDN    | 22.18 | 37.70 | 10.55  | 0.91 | 1.32E-17 |
| L2 | mi Xelaev18009299m.g | pcdh18.S          | PCDH18  | 21.76 | 16.41 | -9.25  | 0.77 | 1.33E-09 |
| L2 | mi Xelaev18024951m.g | emc8.S            | EMC8    | 21.75 | 39.99 | 12.55  | 0.96 | 2.70E-24 |
| L2 | mi Xelaev18017372m.g | gnptab.L          | GNPTAB  | 21.56 | 35.69 | 6.62   | 0.89 | 2.70E-16 |
| L2 | mi Xelaev18016359m.g | alg8.S            | ALG8    | 21.55 | 33.91 | 4.42   | 0.95 | 1.44E-22 |
| L2 | mi Xelaev18027277m.g | mdn1.L            | MDN1    | 21.44 | 30.57 | -3.95  | 0.80 | 9.50E-11 |
| L2 | mi Xelaev18029563m.g | Xelaev18029563m.g | RNPEPL1 | 21.41 | 37.40 | 6.27   | 0.95 | 1.41E-22 |
| L2 | mi Xelaev18044105m.g | jmjd6.L           | JMJD6   | 21.38 | 33.34 | 1.03   | 0.87 | 2.94E-14 |
| L2 | mi Xelaev18045593m.g | rhot2.L           | RHOT2   | 21.11 | 28.51 | 0.96   | 0.91 | 2.01E-17 |

|    |                      |           |         |       |       |        |      |          |
|----|----------------------|-----------|---------|-------|-------|--------|------|----------|
| L2 | mi Xelaev18004729m.g | rcl1.S    | RCL1    | 21.07 | 15.06 | -9.63  | 0.88 | 7.82E-15 |
| L2 | mi Xelaev18003086m.g | src.L     | SRC     | 20.82 | 29.68 | 4.70   | 0.95 | 3.86E-22 |
| L2 | mi Xelaev18046864m.g | nol11.S   | NOL11   | 20.72 | 31.18 | 4.48   | 0.94 | 1.14E-21 |
| L2 | mi Xelaev18001143m.g | ncln.S    | NCLN    | 20.69 | 23.27 | 1.14   | 0.89 | 3.01E-16 |
| L2 | mi Xelaev18020782m.g | cd276.S   | CD276   | 20.66 | 38.32 | 1.15   | 0.90 | 7.61E-17 |
| L2 | mi Xelaev18046718m.g | srp68.S   | SRP68   | 20.50 | 26.68 | 6.90   | 0.92 | 6.82E-19 |
| L2 | mi Xelaev18035213m.g | hspa8.L   | HSPA8   | 20.42 | 19.43 | 1.97   | 0.91 | 5.96E-18 |
| L2 | mi Xelaev18017705m.g | alg12.L   | ALG12   | 20.31 | 26.30 | -0.67  | 0.95 | 2.54E-22 |
| L2 | mi Xelaev18017829m.g | hspa14.L  | HSPA14  | 20.18 | 35.15 | 21.20  | 0.88 | 4.86E-15 |
| L2 | mi Xelaev18034087m.g | exosc4.S  | EXOSC4  | 20.09 | 18.71 | -3.14  | 0.85 | 1.72E-13 |
| L2 | mi Xelaev18034362m.g | atad1.L   | ATAD1   | 19.72 | 28.15 | -3.65  | 0.91 | 5.59E-18 |
| L2 | mi Xelaev18011800m.g | baz1b.L   | BAZ1B   | 19.24 | 18.36 | -4.47  | 0.83 | 5.05E-12 |
| L2 | mi Xelaev18023764m.g | nol8.L    | NOL8    | 19.13 | 42.59 | 15.82  | 0.85 | 4.06E-13 |
| L2 | mi Xelaev18014742m.g | ddx3x.S   | DDX3X   | 18.95 | 45.03 | 17.39  | 0.83 | 1.97E-12 |
| L2 | mi Xelaev18009334m.g | sec24b.S  | SEC24B  | 18.92 | 30.82 | -1.13  | 0.82 | 1.42E-11 |
| L2 | mi Xelaev18039548m.g | cpsf2.L   | CPSF2   | 18.81 | 21.58 | 0.89   | 0.87 | 9.00E-15 |
| L2 | mi Xelaev18033621m.g | myl12b.S  | MYL12A  | 18.54 | 24.06 | -4.07  | 0.85 | 3.07E-13 |
| L2 | mi Xelaev18016464m.g | cdk4.S    | N/B     | 18.37 | 24.21 | -9.74  | 0.87 | 1.80E-14 |
| L2 | mi Xelaev18022567m.g | cenpn.L   | CENPN   | 18.36 | 30.11 | 3.29   | 0.74 | 9.54E-09 |
| L2 | mi Xelaev18045107m.g | eef2kmt.L | EEF2KMT | 18.29 | 13.61 | -8.51  | 0.74 | 1.21E-08 |
| L2 | mi Xelaev18015669m.g | sox21.S   | SOX21   | 18.27 | 12.91 | -9.96  | 0.77 | 1.19E-09 |
| L2 | mi Xelaev18017286m.g | wdr96.L   | CFAP43  | 18.24 | 32.90 | -4.39  | 0.86 | 9.23E-14 |
| L2 | mi Xelaev18025289m.g | cpt2.S    | CPT2    | 18.17 | 37.93 | 17.76  | 0.86 | 7.43E-14 |
| L2 | mi Xelaev18028448m.g | cad.L     | CAD     | 18.13 | 15.55 | -7.65  | 0.88 | 4.54E-15 |
| L2 | mi Xelaev18044280m.g | ern1.L    | ERN1    | 18.04 | 32.50 | 2.26   | 0.88 | 2.80E-15 |
| L2 | mi Xelaev18005523m.g | smad1.L   | SMAD9   | 17.95 | 19.76 | -12.54 | 0.90 | 1.64E-16 |

|    |                      |                   |          |       |       |        |      |          |
|----|----------------------|-------------------|----------|-------|-------|--------|------|----------|
| L2 | mi Xelaev18038759m.g | uprt.L            | UPRT     | 17.69 | 37.00 | 15.25  | 0.94 | 3.87E-21 |
| L2 | mi Xelaev18044791m.g | nup35.L           | NUP35    | 17.66 | 22.19 | -5.20  | 0.91 | 1.23E-17 |
| L2 | mi Xelaev18002192m.g | Xelaev18002192m.g | CDKL4    | 17.40 | 16.81 | -9.45  | 0.81 | 3.79E-11 |
| L2 | mi Xelaev18024927m.g | usp10.S           | USP10    | 17.16 | 36.01 | 8.09   | 0.93 | 1.54E-19 |
| L2 | mi Xelaev18028255m.g | fzd3.L            | FZD3     | 17.14 | 19.65 | 0.14   | 0.87 | 2.33E-14 |
| L2 | mi Xelaev18036882m.g | edrf1.S           | EDRF1    | 17.04 | 39.13 | 11.10  | 0.91 | 9.35E-18 |
| L2 | mi Xelaev18026086m.g | mtif2.L           | MTIF2    | 17.04 | 26.87 | 1.25   | 0.80 | 8.76E-11 |
| L2 | mi Xelaev18029823m.g | c3orf58.S         | DIPK2A   | 16.84 | 27.35 | 1.92   | 0.77 | 1.39E-09 |
| L2 | mi Xelaev18026418m.g | mrpl14.L          | MRPL14   | 16.76 | 18.99 | 5.27   | 0.75 | 4.85E-09 |
| L2 | mi Xelaev18044931m.g | slc39a10.L        | SLC39A10 | 16.59 | 25.77 | -0.07  | 0.90 | 1.09E-16 |
| L2 | mi Xelaev18013640m.g | smarcd1.L         | SMARCD1  | 16.56 | 15.69 | -6.52  | 0.75 | 4.39E-09 |
| L2 | mi Xelaev18025004m.g | sf3b3.S           | SF3B3    | 16.51 | 28.54 | -1.65  | 0.94 | 4.65E-21 |
| L2 | mi Xelaev18031081m.g | stt3b.L           | STT3B    | 16.49 | 28.80 | 5.11   | 0.94 | 7.01E-21 |
| L2 | mi Xelaev18028561m.g | xpo5.S            | XPO5     | 16.47 | 10.65 | -2.51  | 0.80 | 5.19E-11 |
| L2 | mi Xelaev18009632m.g | Xelaev18009632m.g | N/B      | 16.32 | 27.54 | 5.76   | 0.84 | 9.70E-13 |
| L2 | mi Xelaev18037707m.g | ntn1.S            | NTN1     | 15.58 | 12.66 | -11.66 | 0.82 | 6.36E-12 |
| L2 | mi Xelaev18041985m.g | rhog-like.1.S     | RHOG     | 15.56 | 38.63 | 7.08   | 0.92 | 1.76E-18 |
| L2 | mi Xelaev18044663m.g | fastkd1.L         | FASTKD1  | 15.52 | 33.82 | 5.62   | 0.94 | 1.75E-21 |
| L2 | mi Xelaev18042120m.g | Xelaev18042120m.g | AMMECR1  | 15.51 | 24.37 | 1.72   | 0.87 | 1.55E-14 |
| L2 | mi Xelaev18007864m.g | naa25.L           | NAA25    | 15.32 | 27.51 | -0.13  | 0.90 | 2.35E-16 |
| L2 | mi Xelaev18026644m.g | loc100216148.L    | ADPGK    | 15.24 | 42.25 | 13.01  | 0.80 | 5.64E-11 |
| L2 | mi Xelaev18034541m.g | bub3.L            | BUB3     | 15.06 | 30.98 | 10.88  | 0.91 | 4.80E-18 |
| L2 | mi Xelaev18041731m.g | plxnb3.S          | PLXNB3   | 15.04 | 17.07 | -13.25 | 0.60 | 1.46E-05 |
| L2 | mi Xelaev18018533m.g | tia1.L            | TIA1     | 14.68 | 22.60 | 7.53   | 0.93 | 5.85E-20 |
| L2 | mi Xelaev18047703m.g | xpo6.S            | XPO6     | 14.56 | 21.27 | -4.93  | 0.88 | 4.05E-15 |
| L2 | mi Xelaev18023999m.g | rpn1.L            | RPN1     | 14.41 | 18.31 | 1.12   | 0.87 | 2.46E-14 |

|    |                      |                     |         |       |       |        |      |          |
|----|----------------------|---------------------|---------|-------|-------|--------|------|----------|
| L2 | mi Xelaev18017367m.g | utp20.L             | UTP20   | 14.36 | 29.13 | 1.54   | 0.92 | 1.81E-18 |
| L2 | mi Xelaev18015395m.g | ube2g1.S            | UBE2G1  | 14.20 | 31.67 | 7.62   | 0.90 | 9.61E-17 |
| L2 | mi Xelaev18038114m.g | suv39h1.L           | SUV39H1 | 14.19 | 21.27 | -0.65  | 0.86 | 7.27E-14 |
| L2 | mi Xelaev18022477m.g | prmt7.L             | PRMT7   | 14.16 | 39.63 | 13.11  | 0.87 | 2.33E-14 |
| L2 | mi Xelaev18045674m.g | pe10.L              | PELO    | 14.11 | 27.76 | 8.94   | 0.79 | 1.24E-10 |
| L2 | mi Xelaev18029875m.g | dgkd-like.S         | DGKD    | 14.05 | 20.09 | -6.90  | 0.80 | 7.86E-11 |
| L2 | mi Xelaev18039130m.g | tapbp.L             | TAPBP   | 14.00 | 15.35 | -8.58  | 0.85 | 3.15E-13 |
| L2 | mi Xelaev18010671m.g | naa25.S             | NAA25   | 13.98 | 34.55 | 3.65   | 0.92 | 3.17E-18 |
| L2 | mi Xelaev18007546m.g | gcn1.L              | GCN1    | 13.87 | 18.20 | -2.25  | 0.89 | 5.11E-16 |
| L2 | mi Xelaev18017510m.g | n6amt1-like.L       | N6AMT1  | 13.83 | 32.78 | 14.84  | 0.83 | 4.22E-12 |
| L2 | mi Xelaev18046067m.g | eftud2.S            | EFTUD2  | 13.35 | 12.56 | -6.38  | 0.75 | 5.28E-09 |
| L2 | mi Xelaev18022733m.g | slc7a10.L           | SLC7A10 | 13.22 | 34.54 | 9.20   | 0.92 | 5.60E-19 |
| L2 | mi Xelaev18035637m.g | atad3a.L            | ATAD3A  | 12.86 | 37.35 | 18.18  | 0.91 | 3.22E-17 |
| L2 | mi Xelaev18029543m.g | psmd2.S             | PSMD2   | 12.83 | 16.92 | 1.97   | 0.90 | 9.22E-17 |
| L2 | mi Xelaev18025423m.g | klhl20.S            | KLHL20  | 12.80 | 14.78 | -4.20  | 0.87 | 3.60E-14 |
| L2 | mi Xelaev18027431m.g | loc100490363-like.L | TTC16   | 12.80 | 29.81 | 6.57   | 0.87 | 2.10E-14 |
| L2 | mi Xelaev18023666m.g | mief1.L             | MIEF1   | 12.61 | 31.62 | 9.18   | 0.94 | 2.16E-21 |
| L2 | mi Xelaev18040984m.g | slc35a2.S           | SLC35A2 | 12.52 | 27.75 | 1.98   | 0.75 | 6.09E-09 |
| L2 | mi Xelaev18041192m.g | dync1h1.S           | DYNC1H1 | 12.43 | 20.51 | 0.58   | 0.86 | 8.15E-14 |
| L2 | mi Xelaev18009883m.g | pik3r2-like.S       | PIK3R2  | 12.31 | 22.44 | 1.62   | 0.70 | 1.35E-07 |
| L2 | mi Xelaev18002793m.g | pkn3.L              | PKN2    | 12.23 | 11.04 | -10.35 | 0.80 | 1.04E-10 |
| L2 | mi Xelaev18009954m.g | kxd1.S              | KXD1    | 12.09 | 32.67 | 8.20   | 0.88 | 6.05E-15 |
| L2 | mi Xelaev18046631m.g | rbl1.S              | RBL1    | 12.09 | 25.01 | 1.15   | 0.80 | 6.82E-11 |
| L2 | mi Xelaev18017801m.g | sema3c.L            | SEMA3C  | 11.90 | 11.76 | -15.06 | 0.82 | 6.35E-12 |
| L2 | mi Xelaev18028930m.g | fez2.S              | FEZ2    | 11.88 | 39.38 | 8.41   | 0.92 | 4.93E-19 |
| L2 | mi Xelaev18038538m.g | timm8a.L            | TIMM8A  | 11.82 | 31.37 | 16.99  | 0.90 | 8.72E-17 |

|    |                      |                |         |       |       |       |      |          |
|----|----------------------|----------------|---------|-------|-------|-------|------|----------|
| L2 | mi Xelaev18014276m.g | usp16.S        | USP16   | 11.77 | 34.55 | 6.37  | 0.86 | 7.62E-14 |
| L2 | mi Xelaev18047090m.g | rif1.S         | RIF1    | 11.67 | 22.21 | 3.64  | 0.85 | 2.65E-13 |
| L2 | mi Xelaev18020274m.g | loc101734133.S | MCHR1   | 11.64 | 23.03 | -6.27 | 0.90 | 1.35E-16 |
| L2 | mi Xelaev18010449m.g | gcn1.S         | GCN1    | 11.59 | 20.24 | -4.01 | 0.91 | 8.42E-18 |
| L2 | mi Xelaev18005442m.g | fnip2.L        | FNIP2   | 11.50 | 27.42 | 1.11  | 0.91 | 2.72E-17 |
| L2 | mi Xelaev18008284m.g | dhx29.L        | DHX29   | 11.30 | 19.11 | -6.78 | 0.86 | 9.62E-14 |
| L2 | mi Xelaev18044054m.g | hn1.L          | JPT1    | 11.09 | 17.30 | 0.57  | 0.87 | 1.80E-14 |
| L2 | mi Xelaev18036841m.g | bub3.S         | BUB3    | 11.05 | 12.10 | -6.89 | 0.81 | 4.00E-11 |
| L2 | mi Xelaev18023003m.g | dock6-like.L   | DOCK7   | 11.01 | 11.48 | -2.25 | 0.85 | 1.74E-13 |
| L2 | mi Xelaev18018025m.g | adpgk.L        | ADPGK   | 11.01 | 24.38 | -0.88 | 0.79 | 1.62E-10 |
| L2 | mi Xelaev18027641m.g | kpna4.L        | KPNA4   | 10.89 | 28.48 | 11.27 | 0.91 | 8.15E-18 |
| L2 | mi Xelaev18007688m.g | top3b.L        | TOP3B   | 10.85 | 13.44 | -6.98 | 0.79 | 1.21E-10 |
| L2 | mi Xelaev18027456m.g | tfrc.L         | TFRC    | 10.84 | 27.44 | 2.16  | 0.79 | 1.33E-10 |
| L2 | mi Xelaev18015288m.g | ints2.S        | INTS2   | 10.50 | 25.56 | 2.44  | 0.91 | 1.71E-17 |
| L2 | mi Xelaev18032872m.g | kif5b.S        | KIF5B   | 10.48 | 28.72 | 3.12  | 0.86 | 5.24E-14 |
| L2 | mi Xelaev18024911m.g | pdf.S          | PDF     | 10.42 | 23.03 | -3.94 | 0.90 | 2.32E-16 |
| L2 | mi Xelaev18009925m.g | mier2.S        | N/B     | 10.35 | 33.38 | 11.46 | 0.78 | 4.35E-10 |
| L2 | mi Xelaev18005749m.g | metap1.L       | METAP1  | 10.29 | 35.19 | 11.87 | 0.86 | 6.11E-14 |
| L2 | mi Xelaev18015376m.g | tyw1.S         | TYW1    | 10.28 | 31.28 | 14.29 | 0.88 | 1.94E-15 |
| L2 | mi Xelaev18033202m.g | ctnnb1.S       | CTNNB1  | 10.16 | 17.43 | -3.14 | 0.94 | 6.95E-21 |
| L3 | mi Xelaev18021302m.g | hsp90b1.S      | HSP90B1 | 47.04 | 47.41 | 13.08 | 0.96 | 8.40E-24 |
| L3 | mi Xelaev18017704m.g | creld2.L       | CRELD2  | 43.83 | 45.63 | 10.02 | 0.93 | 4.43E-20 |
| L3 | mi Xelaev18047055m.g | mcm6.2.S       | MCM6    | 43.50 | 46.86 | 11.84 | 0.96 | 8.67E-24 |
| L3 | mi Xelaev18028222m.g | zmcm3.L        | MCM3    | 40.34 | 39.43 | 11.41 | 0.93 | 1.01E-19 |
| L3 | mi Xelaev18012617m.g | ak2.L          | AK2     | 39.61 | 42.04 | 9.45  | 0.94 | 1.17E-20 |
| L3 | mi Xelaev18039725m.g | trmt61a.L      | TRMT61A | 39.04 | 42.53 | 9.31  | 0.92 | 4.66E-19 |

|    |                      |                   |          |       |       |       |      |          |
|----|----------------------|-------------------|----------|-------|-------|-------|------|----------|
| L3 | mi Xelaev18024200m.g | lbhd1.S           | C11orf98 | 37.69 | 45.82 | 11.86 | 0.95 | 9.23E-24 |
| L3 | mi Xelaev18025556m.g | mcm5.S            | MCM5     | 37.68 | 36.52 | 5.92  | 0.92 | 9.54E-19 |
| L3 | mi Xelaev18031319m.g | pdia4.L           | PDIA4    | 37.02 | 43.46 | 10.72 | 0.93 | 1.67E-20 |
| L3 | mi Xelaev18025893m.g | mcm2.S            | MCM2     | 36.90 | 35.23 | 14.43 | 0.87 | 9.75E-15 |
| L3 | mi Xelaev18033587m.g | apcdd1.S          | APCDD1   | 36.86 | 47.16 | 12.26 | 0.93 | 1.25E-19 |
| L3 | mi Xelaev18014500m.g | wdr4.S            | WDR4     | 36.79 | 39.77 | 7.71  | 0.92 | 8.10E-19 |
| L3 | mi Xelaev18023987m.g | mcm2.L            | MCM2     | 36.64 | 38.05 | 8.80  | 0.91 | 1.58E-17 |
| L3 | mi Xelaev18016343m.g | ctsc.S            | CTSC     | 36.58 | 19.54 | -3.35 | 0.88 | 2.88E-15 |
| L3 | mi Xelaev18023040m.g | ebna1bp2.L        | EBNA1BP2 | 36.17 | 40.87 | 8.33  | 0.90 | 4.70E-17 |
| L3 | mi Xelaev18031991m.g | mcm4.L            | MCM4     | 35.42 | 33.50 | 10.14 | 0.92 | 2.96E-18 |
| L3 | mi Xelaev18047177m.g | cdca7.S           | CDCA7    | 34.72 | 39.31 | 10.07 | 0.91 | 5.07E-18 |
| L3 | mi Xelaev18006725m.g | plin2.L           | PLIN2    | 34.70 | 20.66 | -9.26 | 0.84 | 9.01E-13 |
| L3 | mi Xelaev18015852m.g | cnpy2.S           | CNPY2    | 34.01 | 33.06 | 9.72  | 0.92 | 1.12E-18 |
| L3 | mi Xelaev18014570m.g | wdr77.S           | WDR77    | 33.70 | 27.85 | 7.00  | 0.93 | 9.34E-20 |
| L3 | mi Xelaev18044530m.g | mcm6.2.L          | MCM6     | 33.59 | 35.74 | 13.05 | 0.90 | 4.04E-17 |
| L3 | mi Xelaev18033539m.g | zadh2.S           | ZADH2    | 32.78 | 32.01 | 3.05  | 0.90 | 3.63E-17 |
| L3 | mi Xelaev18013320m.g | Xelaev18013320m.g | PRKAG1   | 31.99 | 44.10 | 19.74 | 0.94 | 1.83E-21 |
| L3 | mi Xelaev18007841m.g | gpn3.L            | GPN3     | 31.72 | 45.48 | 21.58 | 0.89 | 5.58E-16 |
| L3 | mi Xelaev18019056m.g | Xelaev18019056m.g | CALR     | 31.51 | 34.73 | 4.33  | 0.91 | 3.00E-17 |
| L3 | mi Xelaev18044707m.g | cdca7.L           | CDCA7    | 30.89 | 36.82 | 8.90  | 0.86 | 8.17E-14 |
| L3 | mi Xelaev18026651m.g | dhx57.L           | DHX57    | 30.74 | 39.26 | 9.79  | 0.88 | 2.00E-15 |
| L3 | mi Xelaev18039773m.g | mthfd1.L          | MTHFD1   | 30.09 | 26.73 | 8.48  | 0.86 | 4.83E-14 |
| L3 | mi Xelaev18035296m.g | stt3a.L           | STT3A    | 29.91 | 34.13 | 5.10  | 0.98 | 2.39E-29 |
| L3 | mi Xelaev18033701m.g | mcm4.S            | MCM4     | 29.62 | 34.05 | 14.19 | 0.88 | 4.60E-15 |
| L3 | mi Xelaev18006123m.g | aptx.L            | APTX     | 29.58 | 47.36 | 18.37 | 0.89 | 1.13E-15 |
| L3 | mi Xelaev18007565m.g | mlec.L            | MLEC     | 29.20 | 39.75 | 10.90 | 0.93 | 1.24E-19 |

|    |                      |                   |         |       |       |       |      |          |
|----|----------------------|-------------------|---------|-------|-------|-------|------|----------|
| L3 | mi Xelaev18028581m.g | ccdc167.S         | CCDC167 | 29.10 | 37.08 | 6.44  | 0.92 | 4.31E-19 |
| L3 | mi Xelaev18027197m.g | cd164.L           | CD164   | 28.92 | 38.73 | 12.82 | 0.86 | 5.70E-14 |
| L3 | mi Xelaev18044264m.g | nol11.L           | NOL11   | 28.48 | 45.93 | 11.88 | 0.94 | 7.78E-22 |
| L3 | mi Xelaev18025763m.g | gmppb.S           | GMPPB   | 28.43 | 14.99 | -7.10 | 0.81 | 2.51E-11 |
| L3 | mi Xelaev18023542m.g | mcm5.L            | MCM5    | 28.05 | 27.36 | 1.83  | 0.92 | 1.09E-18 |
| L3 | mi Xelaev18020556m.g | pdia3.S           | PDIA3   | 27.97 | 28.12 | 1.41  | 0.88 | 6.88E-15 |
| L3 | mi Xelaev18007442m.g | rbm19.L           | RBM19   | 27.48 | 33.77 | 9.87  | 0.75 | 4.72E-09 |
| L3 | mi Xelaev18037790m.g | Xelaev18037790m.g | PRMT1   | 27.37 | 35.90 | 9.82  | 0.96 | 4.68E-24 |
| L3 | mi Xelaev18041315m.g | cpsf2.S           | CPSF2   | 26.92 | 39.88 | 9.89  | 0.87 | 1.40E-14 |
| L3 | mi Xelaev18018758m.g | bmp1.L            | BMP1    | 26.86 | 15.00 | -8.91 | 0.84 | 7.11E-13 |
| L3 | mi Xelaev18047021m.g | Xelaev18047021m.g | TUBA1A  | 26.63 | 27.81 | -3.67 | 0.75 | 4.28E-09 |
| L3 | mi Xelaev18026702m.g | desi2.L           | DESI2   | 26.54 | 33.00 | 1.78  | 0.85 | 1.63E-13 |
| L3 | mi Xelaev18034801m.g | hells.L           | HELLS   | 25.95 | 33.75 | 8.49  | 0.88 | 6.99E-15 |
| L3 | mi Xelaev18015757m.g | Xelaev18015757m.g | N/B     | 25.00 | 33.87 | 9.45  | 0.82 | 1.03E-11 |
| L3 | mi Xelaev18025879m.g | chchd4.S          | CHCHD4  | 24.89 | 31.71 | 0.74  | 0.89 | 4.34E-16 |
| L3 | mi Xelaev18006829m.g | rcl1.L            | RCL1    | 24.86 | 35.15 | 9.74  | 0.89 | 1.16E-15 |
| L3 | mi Xelaev18045328m.g | kdelr1.L          | KDEL2   | 24.66 | 33.90 | 7.41  | 0.94 | 7.44E-22 |
| L3 | mi Xelaev18023178m.g | orc1.L            | ORC1    | 24.49 | 33.77 | 9.70  | 0.84 | 1.38E-12 |
| L3 | mi Xelaev18047548m.g | nudt1.S           | NUDT1   | 24.05 | 40.36 | 8.02  | 0.93 | 1.46E-19 |
| L3 | mi Xelaev18007548m.g | pxn.L             | PXN     | 23.67 | 37.46 | 8.43  | 0.79 | 1.69E-10 |
| L3 | mi Xelaev18022464m.g | nup93.L           | NUP93   | 23.63 | 27.84 | 10.14 | 0.89 | 7.70E-16 |
| L3 | mi Xelaev18007810m.g | b3gnt4.L          | B3GNT4  | 23.61 | 30.29 | 13.25 | 0.82 | 1.60E-11 |
| L3 | mi Xelaev18043267m.g | slc35b1.L         | SLC35B1 | 23.56 | 33.25 | 5.54  | 0.91 | 2.44E-17 |
| L3 | mi Xelaev18022257m.g | ganab.L           | GANAB   | 23.51 | 37.44 | 6.32  | 0.94 | 9.92E-21 |
| L3 | mi Xelaev18043753m.g | p4hb.L            | P4HB    | 23.17 | 28.22 | 2.31  | 0.96 | 2.72E-24 |
| L3 | mi Xelaev18033397m.g | txndc5.S          | TXNDC5  | 23.11 | 33.82 | 5.32  | 0.95 | 1.04E-23 |

|    |                      |                   |        |       |       |       |      |          |
|----|----------------------|-------------------|--------|-------|-------|-------|------|----------|
| L3 | mi Xelaev18017756m.g | Xelaev18017756m.g | SYPL1  | 23.08 | 33.67 | 1.74  | 0.91 | 1.43E-17 |
| L3 | mi Xelaev18034687m.g | exosc1.L          | EXOSC1 | 22.76 | 32.75 | 11.22 | 0.93 | 9.56E-20 |
| L3 | mi Xelaev18030542m.g | ngfr.L            | NGFR   | 22.64 | 20.74 | -7.53 | 0.69 | 2.78E-07 |
| L3 | mi Xelaev18007055m.g | prmt5.L           | PRMT5  | 22.23 | 36.34 | 9.26  | 0.97 | 8.82E-27 |
| L3 | mi Xelaev18028917m.g | srsf7.S           | SRSF7  | 22.17 | 26.42 | 0.63  | 0.72 | 4.95E-08 |
| L3 | mi Xelaev18011705m.g | sdf2.L            | SDF2   | 21.92 | 36.30 | 7.98  | 0.96 | 1.52E-24 |
| L3 | mi Xelaev18013439m.g | Xetrov90006328m.L | MARS   | 21.87 | 33.92 | 3.66  | 0.89 | 8.24E-16 |
| L3 | mi Xelaev18004046m.g | rbbp4.S           | RBBP4  | 21.69 | 22.18 | 1.42  | 0.86 | 9.04E-14 |
| L3 | mi Xelaev18011675m.g | blmh.L            | BLMH   | 21.41 | 40.20 | 14.90 | 0.90 | 1.16E-16 |
| L3 | mi Xelaev18007579m.g | drg1.L            | DRG1   | 21.38 | 32.81 | 10.06 | 0.89 | 5.43E-16 |
| L3 | mi Xelaev18019201m.g | mcm7.L            | MCM7   | 21.32 | 21.75 | 0.67  | 0.92 | 1.71E-18 |
| L3 | mi Xelaev18046741m.g | mfsd11.S          | N/B    | 21.31 | 31.43 | -0.17 | 0.86 | 1.06E-13 |
| L3 | mi Xelaev18012612m.g | rbbp4.L           | RBBP4  | 21.29 | 25.66 | 2.29  | 0.85 | 2.37E-13 |
| L3 | mi Xelaev18022556m.g | Xelaev18022556m.g | GCSH   | 21.28 | 34.37 | 14.25 | 0.86 | 1.32E-13 |
| L3 | mi Xelaev18046010m.g | EIF6.S            | EIF6   | 21.26 | 17.61 | -3.83 | 0.93 | 3.09E-20 |
| L3 | mi Xelaev18031769m.g | ZADH2.L           | ZADH2  | 21.22 | 33.46 | -0.79 | 0.95 | 4.00E-22 |
| L3 | mi Xelaev18011098m.g | LIPG.S            | LIPG   | 21.11 | 32.70 | 27.04 | 0.43 | 3.48E-03 |
| L3 | mi Xelaev18008451m.g | LIPG.L            | LIPG   | 20.99 | 33.18 | 6.17  | 0.56 | 6.57E-05 |
| L3 | mi Xelaev18041732m.g | Xelaev18041732m.g | ABCD1  | 20.90 | 24.03 | -4.11 | 0.79 | 1.85E-10 |
| L3 | mi Xelaev18000877m.g | MCM7.S            | MCM7   | 20.52 | 15.25 | -0.15 | 0.75 | 3.46E-09 |
| L3 | mi Xelaev18024906m.g | NOB1.S            | NOB1   | 20.33 | 32.26 | 9.53  | 0.87 | 1.25E-14 |
| L3 | mi Xelaev18036061m.g | Xelaev18036061m.g | PRMT1  | 20.31 | 31.25 | 2.38  | 0.96 | 3.33E-25 |
| L3 | mi Xelaev18000035m.g | PLP2.L            | PLP2   | 20.15 | 16.91 | -9.95 | 0.83 | 4.23E-12 |
| L3 | mi Xelaev18020198m.g | PBDC1.S           | PBDC1  | 20.05 | 30.82 | 9.27  | 0.82 | 1.10E-11 |
| L3 | mi Xelaev18046413m.g | loc100497487.S    | PTRH1  | 19.93 | 41.70 | 26.29 | 0.88 | 5.59E-15 |
| L3 | mi Xelaev18022097m.g | Xelaev18022097m.g | POLR2L | 19.84 | 20.70 | -1.37 | 0.91 | 1.36E-17 |



|    |                      |                   |         |       |       |       |      |          |
|----|----------------------|-------------------|---------|-------|-------|-------|------|----------|
| L3 | mi Xelaev18018585m.g | lman2l.L          | LMAN2L  | 19.76 | 37.61 | 8.91  | 0.91 | 2.00E-17 |
| L3 | mi Xelaev18027417m.g | polr2h.L          | POLR2H  | 19.66 | 29.02 | 12.42 | 0.92 | 5.83E-19 |
| L3 | mi Xelaev18006181m.g | dohh.L            | DOHH    | 19.49 | 27.38 | 11.86 | 0.93 | 4.74E-20 |
| L3 | mi Xelaev18036139m.g | hspbp1.L          | HSPBP1  | 19.36 | 31.14 | 11.94 | 0.81 | 1.94E-11 |
| L3 | mi Xelaev18022454m.g | heatr3.L          | HEATR3  | 19.32 | 28.41 | 0.11  | 0.86 | 1.26E-13 |
| L3 | mi Xelaev18010780m.g | wdr36.S           | WDR36   | 19.27 | 31.39 | 5.27  | 0.92 | 3.49E-19 |
| L3 | mi Xelaev18013779m.g | mipep.L           | MIPEP   | 19.18 | 41.76 | 12.88 | 0.89 | 1.29E-15 |
| L3 | mi Xelaev18013700m.g | alg5.L            | N/B     | 19.12 | 15.98 | -5.07 | 0.86 | 4.42E-14 |
| L3 | mi Xelaev18016354m.g | Xelaev18016354m.g | CLNS1A  | 18.99 | 19.26 | 6.69  | 0.94 | 1.30E-20 |
| L3 | mi Xelaev18032746m.g | ngfr.S            | NGFR    | 18.93 | 32.52 | 1.12  | 0.89 | 6.60E-16 |
| L3 | mi Xelaev18023851m.g | hemk1.L           | HEMK1   | 18.91 | 45.12 | 20.56 | 0.92 | 1.62E-18 |
| L3 | mi Xelaev18032338m.g | derl1.L           | DERL1   | 18.68 | 13.87 | -3.92 | 0.83 | 4.54E-12 |
| L3 | mi Xelaev18037352m.g | stt3a.S           | STT3A   | 18.59 | 29.56 | 4.51  | 0.97 | 1.46E-28 |
| L3 | mi Xelaev18008214m.g | slc30a5.L         | SLC30A5 | 18.49 | 31.54 | 6.34  | 0.93 | 1.75E-19 |
| L3 | mi Xelaev18025282m.g | gpx7.S            | GPX7    | 18.37 | 38.27 | 17.71 | 0.88 | 4.93E-15 |
| L3 | mi Xelaev18024592m.g | prmt3.S           | N/B     | 17.96 | 25.38 | 1.92  | 0.88 | 4.11E-15 |
| L3 | mi Xelaev18026725m.g | ttc27.L           | TTC27   | 17.95 | 35.63 | 14.01 | 0.87 | 2.10E-14 |
| L3 | mi Xelaev18047701m.g | nme4.S            | N/B     | 17.93 | 26.56 | 2.95  | 0.74 | 6.91E-09 |
| L3 | mi Xelaev18044062m.g | llgl2.L           | LLGL2   | 17.85 | 25.60 | -4.90 | 0.81 | 2.54E-11 |
| L3 | mi Xelaev18032559m.g | slc52a1.L         | SLC52A1 | 17.82 | 24.33 | -1.23 | 0.88 | 2.18E-15 |
| L3 | mi Xelaev18039051m.g | ppp5c.L           | N/B     | 17.61 | 31.33 | 4.23  | 0.80 | 7.39E-11 |
| L3 | mi Xelaev18041645m.g | ntmt1.S           | NTMT1   | 17.50 | 29.93 | -1.20 | 0.87 | 8.93E-15 |
| L3 | mi Xelaev18030892m.g | tac1.L            | TAC1    | 17.43 | 14.79 | -7.36 | 0.50 | 5.42E-04 |
| L3 | mi Xelaev18027656m.g | gfm1.L            | GFM1    | 17.40 | 42.27 | 25.06 | 0.93 | 2.03E-19 |
| L3 | mi Xelaev18004050m.g | ak2.S             | N/B     | 17.21 | 37.67 | 15.61 | 0.89 | 3.21E-16 |
| L3 | mi Xelaev18025521m.g | nhp2l1.S          | N/B     | 17.20 | 18.57 | -3.94 | 0.91 | 2.62E-17 |

|    |                      |                   |          |       |       |       |      |          |
|----|----------------------|-------------------|----------|-------|-------|-------|------|----------|
| L3 | mi Xelaev18031742m.g | bloc1s4.L         | BLOC1S4  | 17.15 | 18.55 | -3.96 | 0.85 | 4.47E-13 |
| L3 | mi Xelaev18045047m.g | tra2b.L           | TRA2B    | 17.10 | 27.25 | 3.20  | 0.77 | 7.80E-10 |
| L3 | mi Xelaev18004506m.g | hells.S           | HELLS    | 17.08 | 25.01 | 10.29 | 0.85 | 5.06E-13 |
| L3 | mi Xelaev18009750m.g | sgta.S            | SGTA     | 17.00 | 28.52 | 13.59 | 0.92 | 1.71E-18 |
| L3 | mi Xelaev18027671m.g | ssr3.L            | SSR3     | 16.98 | 16.99 | -2.51 | 0.94 | 5.65E-21 |
| L3 | mi Xelaev18024458m.g | Xelaev18024458m.g | N/B      | 16.93 | 19.83 | 9.19  | 0.82 | 1.20E-11 |
| L3 | mi Xelaev18009082m.g | ppat.S            | PPAT     | 16.77 | 29.97 | 3.07  | 0.88 | 2.61E-15 |
| L3 | mi Xelaev18033246m.g | psma2.S           | PSMA2    | 16.76 | 27.28 | 15.63 | 0.89 | 6.29E-16 |
| L3 | mi Xelaev18025251m.g | cmpk1.S           | CMPK1    | 16.68 | 29.47 | 11.39 | 0.92 | 3.24E-19 |
| L3 | mi Xelaev18003710m.g | mogs.L            | MOGS     | 16.60 | 31.36 | 10.66 | 0.85 | 3.45E-13 |
| L3 | mi Xelaev18022120m.g | capn1.L           | CAPN1    | 16.52 | 11.01 | -8.67 | 0.76 | 2.57E-09 |
| L3 | mi Xelaev18035316m.g | rexo2.L           | N/B      | 16.21 | 28.70 | 9.20  | 0.90 | 2.37E-16 |
| L3 | mi Xelaev18025924m.g | slc25a20.2.S      | SLC25A20 | 16.05 | 25.88 | -1.79 | 0.89 | 6.44E-16 |
| L3 | mi Xelaev18020417m.g | cln6.S            | CLN6     | 16.04 | 33.29 | 7.84  | 0.87 | 2.63E-14 |
| L3 | mi Xelaev18008550m.g | stoml2.L          | STOML2   | 15.82 | 17.32 | -4.01 | 0.71 | 8.00E-08 |
| L3 | mi Xelaev18026522m.g | xpo1.L            | XPO1     | 15.60 | 33.51 | 10.16 | 0.83 | 3.69E-12 |
| L3 | mi Xelaev18017754m.g | ccdc71l.L         | CCDC71L  | 15.52 | 28.31 | 2.56  | 0.80 | 5.96E-11 |
| L3 | mi Xelaev18015874m.g | cdk2.S            | N/B      | 15.50 | 22.23 | -1.32 | 0.80 | 8.38E-11 |
| L3 | mi Xelaev18015587m.g | pcid2.S           | PCID2    | 15.38 | 24.11 | 6.34  | 0.85 | 2.42E-13 |
| L3 | mi Xelaev18012233m.g | znhit3.L          | ZNHIT3   | 15.32 | 23.13 | 12.17 | 0.83 | 5.61E-12 |
| L3 | mi Xelaev18020981m.g | Xelaev18020981m.g | SYPL1    | 15.16 | 28.24 | -2.35 | 0.84 | 7.91E-13 |
| L3 | mi Xelaev18022560m.g | Xelaev18022560m.g | GCSH     | 15.11 | 30.01 | 5.87  | 0.77 | 1.02E-09 |
| L3 | mi Xelaev18042325m.g | ddx26b.S          | N/B      | 15.05 | 25.34 | -5.41 | 0.81 | 2.21E-11 |
| L3 | mi Xelaev18009860m.g | mob3a.S           | MOB3A    | 14.86 | 31.36 | 2.54  | 0.84 | 1.78E-12 |
| L3 | mi Xelaev18023962m.g | chchd4.L          | N/B      | 14.84 | 38.18 | 20.01 | 0.94 | 5.45E-22 |
| L3 | mi Xelaev18024234m.g | Xelaev18024234m.g | TRMT112  | 14.83 | 19.50 | 1.59  | 0.94 | 4.65E-21 |

|    |                      |                   |         |       |       |       |      |          |
|----|----------------------|-------------------|---------|-------|-------|-------|------|----------|
| L3 | mi Xelaev18024202m.g | ganab.S           | N/B     | 14.76 | 27.06 | -0.52 | 0.90 | 1.79E-16 |
| L3 | mi Xelaev18023937m.g | sec13.L           | SEC13   | 14.75 | 21.60 | -0.12 | 0.92 | 2.40E-18 |
| L3 | mi Xelaev18027925m.g | gk5.L             | GK5     | 14.71 | 27.23 | -3.60 | 0.85 | 4.85E-13 |
| L3 | mi Xelaev18037591m.g | hes3.S            | HES3    | 14.69 | 19.50 | -3.87 | 0.76 | 2.23E-09 |
| L3 | mi Xelaev18005042m.g | haus3.L           | N/B     | 14.58 | 13.64 | -4.91 | 0.81 | 3.33E-11 |
| L3 | mi Xelaev18045844m.g | hm13.S            | HM13    | 14.57 | 24.73 | 1.84  | 0.95 | 1.15E-22 |
| L3 | mi Xelaev18022459m.g | adcy7.L           | ADCY7   | 14.51 | 20.31 | -9.41 | 0.70 | 1.38E-07 |
| L3 | mi Xelaev18018952m.g | gipc1.L           | GIPC1   | 14.50 | 19.25 | -4.21 | 0.83 | 2.82E-12 |
| L3 | mi Xelaev18039674m.g | tmx1.L            | TMX1    | 14.49 | 33.91 | 7.26  | 0.89 | 2.63E-16 |
| L3 | mi Xelaev18043986m.g | e2f1.L            | E2F1    | 14.44 | 23.88 | 6.05  | 0.73 | 2.34E-08 |
| L3 | mi Xelaev18027557m.g | Xelaev18027557m.g | ACTL6A  | 14.44 | 27.22 | 4.65  | 0.90 | 7.41E-17 |
| L3 | mi Xelaev18023326m.g | tmed5.L           | TMED5   | 14.30 | 17.49 | 4.10  | 0.78 | 4.37E-10 |
| L3 | mi Xelaev18039446m.g | fcf1.L            | FCF1    | 13.98 | 17.75 | -2.44 | 0.75 | 4.75E-09 |
| L3 | mi Xelaev18046644m.g | e2f1.S            | E2F1    | 13.93 | 20.85 | -4.69 | 0.68 | 4.26E-07 |
| L3 | mi Xelaev18013470m.g | mettl21b.L        | N/B     | 13.92 | 28.26 | -0.03 | 0.82 | 1.19E-11 |
| L3 | mi Xelaev18027146m.g | fam26d.L          | CALHM4  | 13.87 | 23.27 | 6.70  | 0.88 | 4.10E-15 |
| L3 | mi Xelaev18006236m.g | cirbp.L           | N/B     | 13.73 | 26.95 | 17.63 | 0.93 | 6.83E-20 |
| L3 | mi Xelaev18025133m.g | alg6.S            | ALG6    | 13.69 | 39.21 | 18.79 | 0.89 | 5.52E-16 |
| L3 | mi Xelaev18014175m.g | blmh.S            | BLMH    | 13.64 | 33.79 | 14.66 | 0.84 | 9.52E-13 |
| L3 | mi Xelaev18042168m.g | tspan6.S          | TSPAN6  | 13.60 | 32.17 | 9.33  | 0.90 | 2.05E-16 |
| L3 | mi Xelaev18013138m.g | uggt2.L           | UGGT2   | 13.52 | 30.38 | 3.46  | 0.83 | 4.04E-12 |
| L3 | mi Xelaev18029561m.g | eif2b5.S          | EIF2B5  | 13.47 | 40.74 | 17.51 | 0.88 | 2.90E-15 |
| L3 | mi Xelaev18025187m.g | nasp.S            | N/B     | 13.46 | 30.01 | 15.41 | 0.69 | 2.20E-07 |
| L3 | mi Xelaev18013387m.g | tmem198.L         | TMEM198 | 13.43 | 12.56 | -9.03 | 0.57 | 5.57E-05 |
| L3 | mi Xelaev18043403m.g | cse1l.L           | CSE1L   | 13.30 | 15.92 | -1.90 | 0.82 | 1.32E-11 |
| L3 | mi Xelaev18025273m.g | nrdc.S            | NRDC    | 13.30 | 33.89 | 7.84  | 0.91 | 2.47E-17 |

|    |                      |                   |          |       |       |       |      |          |
|----|----------------------|-------------------|----------|-------|-------|-------|------|----------|
| L3 | mi Xelaev18024639m.g | Xelaev18024639m.g | N/B      | 13.26 | 23.55 | 0.00  | 0.63 | 4.38E-06 |
| L3 | mi Xelaev18024347m.g | pkp3.S            | PKP3     | 13.11 | 22.12 | -7.79 | 0.72 | 3.89E-08 |
| L3 | mi Xelaev18031629m.g | eef1e1.L          | N/B      | 13.03 | 25.17 | 5.22  | 0.94 | 1.05E-20 |
| L3 | mi Xelaev18024332m.g | fen1.S            | FEN1     | 13.00 | 29.15 | 9.97  | 0.93 | 2.90E-19 |
| L3 | mi Xelaev18037583m.g | loc779604.S       | C1orf174 | 13.00 | 20.24 | 0.91  | 0.80 | 8.68E-11 |
| L3 | mi Xelaev18046031m.g | slc35b1.S         | SLC35B1  | 12.74 | 25.13 | 2.75  | 0.93 | 1.92E-19 |
| L3 | mi Xelaev18022776m.g | orc6.L            | ORC6     | 12.68 | 21.51 | 9.08  | 0.75 | 5.22E-09 |
| L3 | mi Xelaev18029551m.g | alg3.S            | ALG3     | 12.68 | 30.57 | 3.83  | 0.90 | 4.68E-17 |
| L3 | mi Xelaev18003084m.g | ctnbn1.L          | N/B      | 12.61 | 17.07 | -1.43 | 0.73 | 2.01E-08 |
| L3 | mi Xelaev18044630m.g | gca.L             | GCA      | 12.50 | 30.98 | 2.86  | 0.85 | 2.25E-13 |
| L3 | mi Xelaev18012773m.g | mrps17.L          | MRPS17   | 12.48 | 25.20 | 11.52 | 0.80 | 5.32E-11 |
| L3 | mi Xelaev18025691m.g | polr2f.S          | POLR2F   | 12.43 | 25.66 | 8.11  | 0.88 | 3.79E-15 |
| L3 | mi Xelaev18000134m.g | ppp1r3b.L         | PPP1R3B  | 12.40 | 40.68 | 15.40 | 0.62 | 7.82E-06 |
| L3 | mi Xelaev18028947m.g | tcp1.S            | TCP1     | 12.38 | 28.99 | 8.72  | 0.96 | 2.10E-24 |
| L3 | mi Xelaev18025085m.g | lrriq3.S          | LRRIQ3   | 12.12 | 14.88 | -9.31 | 0.77 | 1.43E-09 |
| L3 | mi Xelaev18017652m.g | naa38-like.L      | LSM8     | 12.11 | 19.36 | 5.16  | 0.90 | 2.22E-16 |
| L3 | mi Xelaev18039667m.g | nid2.L            | NID2     | 11.97 | 12.68 | -9.53 | 0.75 | 5.52E-09 |
| L3 | mi Xelaev18035169m.g | mtg1.L            | MTG1     | 11.88 | 25.60 | 8.13  | 0.74 | 6.85E-09 |
| L3 | mi Xelaev18035689m.g | lepre1.L          | P3H1     | 11.87 | 33.42 | 12.72 | 0.73 | 1.99E-08 |
| L3 | mi Xelaev18023002m.g | atg4c.L           | ATG4C    | 11.73 | 21.91 | -1.94 | 0.92 | 2.39E-18 |
| L3 | mi Xelaev18010463m.g | Xelaev18010463m.g | SRSF9    | 11.70 | 25.35 | 1.55  | 0.93 | 7.44E-20 |
| L3 | mi Xelaev18008924m.g | msx1.S            | N/B      | 11.67 | 15.77 | -4.35 | 0.71 | 6.06E-08 |
| L3 | mi Xelaev18008749m.g | cct7.S            | CCT7     | 11.47 | 19.03 | -9.73 | 0.90 | 6.44E-17 |
| L3 | mi Xelaev18043048m.g | mapre1.L          | MAPRE1   | 11.45 | 19.26 | 1.19  | 0.95 | 4.35E-22 |
| L3 | mi Xelaev18028276m.g | stmn4.L           | STMN4    | 11.38 | 16.68 | -3.16 | 0.76 | 2.42E-09 |
| L3 | mi Xelaev18038688m.g | magt1-like.L      | MAGT1    | 11.34 | 27.14 | 3.85  | 0.85 | 1.64E-13 |

|    |                      |                   |         |       |       |       |      |          |
|----|----------------------|-------------------|---------|-------|-------|-------|------|----------|
| L3 | mi Xelaev18026449m.g | mkks.L            | MKKS    | 11.31 | 32.51 | 14.41 | 0.92 | 2.16E-18 |
| L3 | mi Xelaev18039217m.g | vars.L            | VARS    | 11.28 | 28.55 | 10.31 | 0.90 | 6.16E-17 |
| L3 | mi Xelaev18015126m.g | rpa2.S            | RPA2    | 11.21 | 18.97 | 10.40 | 0.76 | 2.13E-09 |
| L3 | mi Xelaev18025437m.g | itpa-like.S       | N/B     | 11.17 | 30.74 | 12.25 | 0.91 | 1.09E-17 |
| L3 | mi Xelaev18030142m.g | mrpl19.S          | MRPL19  | 11.04 | 17.72 | 14.41 | 0.81 | 1.73E-11 |
| L3 | mi Xelaev18010930m.g | slc30a5.S         | SLC30A5 | 11.02 | 25.73 | 4.13  | 0.89 | 8.24E-16 |
| L3 | mi Xelaev18047428m.g | hspd1.S           | HSPD1   | 10.93 | 30.67 | 18.44 | 0.85 | 1.64E-13 |
| L3 | mi Xelaev18021349m.g | tmed9.S           | TMED9   | 10.91 | 36.10 | 14.46 | 0.97 | 2.87E-27 |
| L3 | mi Xelaev18013024m.g | nipa2.L           | NIPA2   | 10.86 | 24.93 | 8.22  | 0.88 | 6.36E-15 |
| L3 | mi Xelaev18045227m.g | lfng.L            | LFNG    | 10.82 | 20.06 | -5.09 | 0.81 | 4.04E-11 |
| L3 | mi Xelaev18014498m.g | pknox1.S          | PKNOX1  | 10.82 | 14.11 | -3.97 | 0.69 | 2.28E-07 |
| L3 | mi Xelaev18013468m.g | mettl1.L          | METTL1  | 10.81 | 21.69 | -1.31 | 0.84 | 6.84E-13 |
| L3 | mi Xelaev18007704m.g | comt.L            | N/B     | 10.80 | 21.57 | 2.94  | 0.89 | 5.70E-16 |
| L3 | mi Xelaev18018997m.g | dnmt1.L           | DNMT1   | 10.79 | 14.57 | 0.43  | 0.79 | 1.63E-10 |
| L3 | mi Xelaev18016398m.g | wnt11.S           | WNT11   | 10.68 | 17.93 | -2.63 | 0.72 | 4.37E-08 |
| L3 | mi Xelaev18025755m.g | usp4.S            | USP4    | 10.67 | 13.87 | -4.35 | 0.74 | 8.65E-09 |
| L3 | mi Xelaev18044106m.g | srsf2.L           | N/B     | 10.61 | 12.11 | -1.67 | 0.89 | 6.39E-16 |
| L3 | mi Xelaev18009768m.g | cirbp.S           | N/B     | 10.46 | 30.85 | 21.82 | 0.90 | 2.16E-16 |
| L3 | mi Xelaev18018480m.g | eif3j-like.L      | EIF3J   | 10.45 | 26.29 | 3.44  | 0.91 | 8.43E-18 |
| L3 | mi Xelaev18009261m.g | abce1.S           | ABCE1   | 10.38 | 32.77 | 11.62 | 0.97 | 1.32E-27 |
| L3 | mi Xelaev18025861m.g | sec13.S           | SEC13   | 10.30 | 25.53 | 12.63 | 0.85 | 4.69E-13 |
| L3 | mi Xelaev18022292m.g | slc29a2.L         | SLC29A2 | 10.28 | 33.27 | 12.08 | 0.90 | 4.20E-17 |
| L3 | mi Xelaev18027501m.g | b3gnt5.L          | B3GNT5  | 10.27 | 31.05 | 4.73  | 0.70 | 1.51E-07 |
| L3 | mi Xelaev18044357m.g | itgb5.L           | ITGB5   | 10.26 | 33.50 | 5.91  | 0.84 | 9.03E-13 |
| L3 | mi Xelaev18037879m.g | Xelaev18037879m.g | KDELR1  | 10.22 | 22.98 | 7.31  | 0.87 | 3.14E-14 |
| L3 | mi Xelaev18042470m.g | vars.S            | VARS    | 10.10 | 29.26 | 6.12  | 0.82 | 1.47E-11 |

|    |                      |                   |            |       |       |        |      |          |
|----|----------------------|-------------------|------------|-------|-------|--------|------|----------|
| L3 | mi Xelaev18012826m.g | alcam.L           | ALCAM      | 10.04 | 15.46 | -12.26 | 0.88 | 2.04E-15 |
| D3 | mi Xelaev18025339m.g | rgs8.S            | RGS8       | 44.84 | 48.40 | 4.47   | 0.89 | 1.26E-15 |
| D3 | mi Xelaev18041431m.g | loc101731931.S    | CYR61      | 36.15 | 53.05 | 25.96  | 0.87 | 8.24E-15 |
| D3 | mi Xelaev18010763m.g | cdo1.S            | CDO1       | 35.71 | 37.77 | -2.43  | 0.91 | 1.02E-17 |
| D3 | mi Xelaev18026738m.g | vip.L             | VIP        | 35.68 | 23.10 | -7.48  | 0.86 | 1.15E-13 |
| D3 | mi Xelaev18017751m.g | hbp1.L            | HBP1       | 34.99 | 52.52 | 21.83  | 0.94 | 2.56E-21 |
| D3 | mi Xelaev18008055m.g | pcsk1.L           | PCSK1      | 34.07 | 45.70 | -1.34  | 0.79 | 1.63E-10 |
| D3 | mi Xelaev18036661m.g | slc18a2-like.2.S  | SLC18A2    | 33.64 | 39.99 | 15.00  | 0.85 | 3.16E-13 |
| D3 | mi Xelaev18021718m.g | calca.L           | N/B        | 32.89 | 54.07 | 13.29  | 0.65 | 2.27E-06 |
| D3 | mi Xelaev18020629m.g | scg3.S            | SCG3       | 32.43 | 39.47 | -6.94  | 0.90 | 1.39E-16 |
| D3 | mi Xelaev18031724m.g | nrsn1.L           | NRSN1      | 31.82 | 30.08 | -6.98  | 0.79 | 1.44E-10 |
| D3 | mi Xelaev18030959m.g | hdac9.L           | HDAC9      | 31.12 | 39.88 | 7.86   | 0.88 | 3.05E-15 |
| D3 | mi Xelaev18015657m.g | loc100486181.S    | APOBEC3A   | 30.72 | 41.06 | 16.67  | 0.91 | 1.32E-17 |
| D3 | mi Xelaev18043846m.g | nbr1.L            | NBR1       | 30.36 | 48.80 | 19.93  | 0.94 | 1.01E-21 |
| D3 | mi Xelaev18012367m.g | tbl1x.L           | TBL1X      | 29.73 | 31.75 | -6.75  | 0.94 | 9.33E-21 |
| D3 | mi Xelaev18041772m.g | emd.S             | EMD        | 28.77 | 49.36 | 18.71  | 0.94 | 4.79E-21 |
| D3 | mi Xelaev18025749m.g | loc100487499.S    | N/B        | 27.70 | 42.29 | 18.57  | 0.85 | 4.36E-13 |
| D3 | mi Xelaev18045353m.g | acsm3.L           | ACSM3      | 27.57 | 32.04 | -1.38  | 0.85 | 5.00E-13 |
| D3 | mi Xelaev18017836m.g | upf2.L            | UPF2       | 27.18 | 45.24 | 10.38  | 0.89 | 3.45E-16 |
| D3 | mi Xelaev18044101m.g | st6galnac2.L      | ST6GALNAC2 | 27.04 | 16.31 | -9.00  | 0.87 | 2.29E-14 |
| D3 | mi Xelaev18007692m.g | ypel1.L           | YPEL1      | 26.37 | 46.79 | 13.95  | 0.93 | 1.42E-19 |
| D3 | mi Xelaev18022109m.g | Xelaev18022109m.g | N/B        | 26.07 | 11.42 | -7.66  | 0.82 | 6.62E-12 |
| D3 | mi Xelaev18030882m.g | pdk4.L            | N/B        | 25.96 | 28.86 | -4.79  | 0.89 | 8.47E-16 |
| D3 | mi Xelaev18013970m.g | stard10.L         | STARD10    | 25.49 | 34.70 | -5.78  | 0.84 | 1.18E-12 |
| D3 | mi Xelaev18039005m.g | loc100127779.L    | CCDC160    | 25.08 | 35.95 | 11.84  | 0.94 | 1.47E-20 |
| D3 | mi Xelaev18027093m.g | eya4-like.L       | EYA4       | 25.07 | 26.23 | -5.51  | 0.83 | 2.31E-12 |

|    |                      |                   |          |       |       |        |      |          |
|----|----------------------|-------------------|----------|-------|-------|--------|------|----------|
| D3 | mi Xelaev18038781m.g | smarca1.L         | SMARCA1  | 24.67 | 31.46 | -4.58  | 0.87 | 1.02E-14 |
| D3 | mi Xelaev18020469m.g | arrdc4.S          | ARRDC4   | 24.24 | 23.97 | 11.26  | 0.88 | 2.50E-15 |
| D3 | mi Xelaev18020261m.g | loc100496891.S    | N/B      | 23.77 | 33.94 | 8.67   | 0.82 | 1.61E-11 |
| D3 | mi Xelaev18038791m.g | irs4.L            | IRS2     | 23.71 | 35.31 | 6.77   | 0.91 | 4.20E-18 |
| D3 | mi Xelaev18020988m.g | hbp1.S            | HBP1     | 23.63 | 46.69 | 19.71  | 0.89 | 3.17E-16 |
| D3 | mi Xelaev18011592m.g | col8a1.L          | COL8A1   | 23.46 | 13.62 | -8.88  | 0.72 | 3.66E-08 |
| D3 | mi Xelaev18038396m.g | tsc1.L            | TSC1     | 23.43 | 42.94 | 25.52  | 0.90 | 2.42E-16 |
| D3 | mi Xelaev18043626m.g | Xelaev18043626m.g | ZNF704   | 23.36 | 46.66 | 26.05  | 0.86 | 4.38E-14 |
| D3 | mi Xelaev18044241m.g | wipi1.L           | WIPI1    | 23.03 | 43.33 | 16.54  | 0.95 | 8.93E-23 |
| D3 | mi Xelaev18046347m.g | Xelaev18046347m.g | ZNF704   | 23.02 | 49.25 | 30.07  | 0.91 | 1.15E-17 |
| D3 | mi Xelaev18005409m.g | sap30.L           | SAP30    | 22.93 | 57.28 | 24.76  | 0.79 | 1.98E-10 |
| D3 | mi Xelaev18018045m.g | hmg20a.L          | HMG20A   | 22.88 | 34.75 | 3.96   | 0.94 | 1.02E-20 |
| D3 | mi Xelaev18045263m.g | gpr146.L          | GPR146   | 22.68 | 32.28 | 1.66   | 0.81 | 4.15E-11 |
| D3 | mi Xelaev18018052m.g | loc100158581.L    | PTPN9    | 22.45 | 49.49 | 11.59  | 0.89 | 1.48E-15 |
| D3 | mi Xelaev18032982m.g | pdk4.S            | N/B      | 22.42 | 17.93 | -5.73  | 0.90 | 1.36E-16 |
| D3 | mi Xelaev18002495m.g | Xelaev18002495m.g | N/B      | 22.29 | 35.36 | 6.43   | 0.90 | 1.54E-16 |
| D3 | mi Xelaev18023830m.g | slc38a3.L         | SLC38A3  | 21.85 | 17.45 | -7.38  | 0.84 | 7.42E-13 |
| D3 | mi Xelaev18025657m.g | nptxr.S           | NPTXR    | 21.51 | 27.15 | -11.25 | 0.76 | 1.66E-09 |
| D3 | mi Xelaev18022688m.g | kiaa0513.L        | KIAA0513 | 21.50 | 30.12 | -6.80  | 0.85 | 2.24E-13 |
| D3 | mi Xelaev18031888m.g | adcyp1.L          | ADCYAP1  | 21.39 | 31.18 | -2.51  | 0.80 | 4.56E-11 |
| D3 | mi Xelaev18044167m.g | foxk2.L           | FOXK2    | 21.28 | 38.47 | 22.31  | 0.90 | 1.44E-16 |
| D3 | mi Xelaev18039311m.g | loc100487262.L    | N/B      | 21.15 | 26.45 | 0.15   | 0.83 | 3.04E-12 |
| D3 | mi Xelaev18018365m.g | acan.L            | ACAN     | 21.05 | 34.93 | -1.70  | 0.74 | 1.29E-08 |
| D3 | mi Xelaev18037914m.g | cdknx.S           | CDKN1B   | 20.62 | 39.79 | 14.10  | 0.88 | 1.79E-15 |
| D3 | mi Xelaev18003642m.g | htr1a.S           | HTR1A    | 20.24 | 26.59 | -8.77  | 0.84 | 1.38E-12 |
| D3 | mi Xelaev18014688m.g | csde1.S           | CSDE1    | 20.16 | 12.74 | -10.16 | 0.80 | 8.18E-11 |

|    |                      |                   |         |       |       |       |      |          |
|----|----------------------|-------------------|---------|-------|-------|-------|------|----------|
| D3 | mi Xelaev18013763m.g | mtif3.L           | MTIF3   | 20.07 | 23.45 | 2.77  | 0.90 | 2.02E-16 |
| D3 | mi Xelaev18033616m.g | zbtb14.S          | ZBTB14  | 20.03 | 30.84 | 1.22  | 0.72 | 3.34E-08 |
| D3 | mi Xelaev18005685m.g | pde5a.L           | N/B     | 19.97 | 10.97 | -4.45 | 0.82 | 1.38E-11 |
| D3 | mi Xelaev18038639m.g | acrc.L            | GCNA    | 19.90 | 25.66 | -1.42 | 0.78 | 4.45E-10 |
| D3 | mi Xelaev18012702m.g | syap1.L           | SYAP1   | 19.90 | 18.03 | 3.76  | 0.80 | 6.47E-11 |
| D3 | mi Xelaev18041751m.g | itih6.S           | ITIH6   | 19.55 | 40.20 | 14.43 | 0.88 | 1.67E-15 |
| D3 | mi Xelaev18022580m.g | nudt7.L           | NUDT7   | 19.30 | 30.33 | -3.87 | 0.72 | 3.24E-08 |
| D3 | mi Xelaev18045205m.g | syt17.L           | SYT17   | 19.26 | 29.63 | 3.80  | 0.90 | 1.75E-16 |
| D3 | mi Xelaev18025281m.g | zcchc11.S         | TUT4    | 19.25 | 20.76 | 1.49  | 0.87 | 1.83E-14 |
| D3 | mi Xelaev18025743m.g | MGC75753.S        | BTG1    | 18.96 | 42.23 | 15.99 | 0.83 | 2.09E-12 |
| D3 | mi Xelaev18018799m.g | vps41.L           | VPS41   | 18.80 | 13.59 | 2.30  | 0.75 | 4.03E-09 |
| D3 | mi Xelaev18028490m.g | loc100491791.S    | N/B     | 18.62 | 12.40 | -6.18 | 0.82 | 6.00E-12 |
| D3 | mi Xelaev18028620m.g | adck3.S           | COQ8A   | 18.61 | 30.05 | 2.78  | 0.77 | 1.24E-09 |
| D3 | mi Xelaev18007577m.g | pik3ip1.L         | PIK3IP1 | 18.60 | 14.48 | -0.28 | 0.87 | 1.54E-14 |
| D3 | mi Xelaev18014789m.g | tbl1x.S           | TBL1X   | 18.59 | 18.20 | -9.98 | 0.88 | 4.83E-15 |
| D3 | mi Xelaev18018209m.g | scg3.L            | SCG3    | 18.53 | 21.50 | -9.08 | 0.87 | 1.08E-14 |
| D3 | mi Xelaev18033741m.g | tox.S             | TOX     | 18.34 | 30.57 | 0.02  | 0.85 | 3.91E-13 |
| D3 | mi Xelaev18003535m.g | mecp2.L           | MECP2   | 18.33 | 29.49 | 10.11 | 0.87 | 1.85E-14 |
| D3 | mi Xelaev18041885m.g | Xelaev18041885m.g | NT5DC2  | 18.14 | 45.21 | 25.51 | 0.87 | 9.94E-15 |
| D3 | mi Xelaev18020639m.g | fam214a.S         | FAM214A | 17.98 | 34.75 | 5.80  | 0.81 | 3.32E-11 |
| D3 | mi Xelaev18034748m.g | Xelaev18034748m.g | IFIT5   | 17.75 | 27.43 | 10.55 | 0.83 | 3.01E-12 |
| D3 | mi Xelaev18013532m.g | rapgef3.L         | RAPGEF3 | 17.02 | 29.17 | 15.90 | 0.79 | 1.25E-10 |
| D3 | mi Xelaev18046827m.g | ndel1.S           | NDEL1   | 16.96 | 31.19 | -1.39 | 0.85 | 2.38E-13 |
| D3 | mi Xelaev18038289m.g | dbh.L             | DBH     | 16.84 | 32.85 | 2.93  | 0.86 | 4.71E-14 |
| D3 | mi Xelaev18003720m.g | mgc108213.L       | CYP46A1 | 16.62 | 34.77 | 13.38 | 0.78 | 3.09E-10 |
| D3 | mi Xelaev18040384m.g | Xelaev18040384m.g | N/B     | 16.59 | 49.20 | 17.41 | 0.96 | 2.60E-24 |



|    |                      |                     |         |       |       |        |      |          |
|----|----------------------|---------------------|---------|-------|-------|--------|------|----------|
| D3 | mi Xelaev18037641m.g | Xelaev18037641m.g   | CRYAB   | 16.25 | 33.37 | 3.97   | 0.82 | 1.38E-11 |
| D3 | mi Xelaev18014071m.g | loc100496869.L      | NEU3    | 16.01 | 25.11 | -0.17  | 0.90 | 6.70E-17 |
| D3 | mi Xelaev18000174m.g | irx5.1.L            | IRX5    | 15.98 | 46.23 | 12.07  | 0.92 | 2.85E-18 |
| D3 | mi Xelaev18025667m.g | tob2.S              | N/B     | 15.72 | 31.21 | -0.45  | 0.91 | 1.05E-17 |
| D3 | mi Xelaev18014618m.g | hip1.S              | HIP1    | 15.71 | 46.77 | 20.23  | 0.73 | 1.81E-08 |
| D3 | mi Xelaev18037639m.g | Xelaev18037639m.g   | CRYAB   | 15.57 | 53.12 | 30.15  | 0.90 | 2.49E-16 |
| D3 | mi Xelaev18013073m.g | loc100498409-like.L | IRS2    | 15.52 | 29.58 | 10.86  | 0.94 | 1.01E-20 |
| D3 | mi Xelaev18026142m.g | epas1.L             | EPAS1   | 15.27 | 42.19 | 23.28  | 0.84 | 7.58E-13 |
| D3 | mi Xelaev18011170m.g | loc101732034.S      | N/B     | 15.23 | 24.27 | -3.12  | 0.72 | 4.36E-08 |
| D3 | mi Xelaev18024417m.g | Xelaev18024417m.g   | CSTF3   | 15.22 | 38.09 | 19.48  | 0.72 | 3.98E-08 |
| D3 | mi Xelaev18019886m.g | slc6a12.S           | SLC6A12 | 15.16 | 25.33 | 1.03   | 0.71 | 9.03E-08 |
| D3 | mi Xelaev18005367m.g | casp3.L             | N/B     | 15.15 | 35.18 | 15.91  | 0.88 | 2.51E-15 |
| D3 | mi Xelaev18015346m.g | rph3al.S            | RPH3AL  | 15.09 | 29.42 | 1.91   | 0.64 | 3.51E-06 |
| D3 | mi Xelaev18047038m.g | cdk5r2.S            | CDK5R2  | 15.02 | 18.10 | -13.31 | 0.63 | 5.41E-06 |
| D3 | mi Xelaev18002260m.g | sgf29.S             | SGF29   | 14.98 | 35.74 | 8.56   | 0.81 | 1.67E-11 |
| D3 | mi Xelaev18039949m.g | cfl2.L              | CFL2    | 14.94 | 34.01 | 12.41  | 0.89 | 6.51E-16 |
| D3 | mi Xelaev18041618m.g | uck1.S              | UCK1    | 14.80 | 30.13 | 2.05   | 0.91 | 1.72E-17 |
| D3 | mi Xelaev18036619m.g | pdcd4.S             | PDCD4   | 14.80 | 34.94 | 16.15  | 0.93 | 9.62E-20 |
| D3 | mi Xelaev18003908m.g | nt5c2.L             | NT5C2   | 14.68 | 30.08 | 1.85   | 0.74 | 1.25E-08 |
| D3 | mi Xelaev18028669m.g | eprs-like.S         | EPRS    | 14.64 | 24.65 | 1.34   | 0.82 | 1.03E-11 |
| D3 | mi Xelaev18032944m.g | nmt1.S              | NMT2    | 14.61 | 23.54 | -1.87  | 0.71 | 7.91E-08 |
| D3 | mi Xelaev18016009m.g | znf385a.S           | ZNF385A | 14.33 | 37.39 | 13.74  | 0.72 | 4.90E-08 |
| D3 | mi Xelaev18005853m.g | Xelaev18005853m.g   | CCDC158 | 13.85 | 10.11 | -10.23 | 0.76 | 1.59E-09 |
| D3 | mi Xelaev18020110m.g | map2k7.S            | MAP2K7  | 13.82 | 32.53 | 8.83   | 0.77 | 8.40E-10 |
| D3 | mi Xelaev18024931m.g | atp2c2.S            | ATP2C2  | 13.78 | 12.26 | -15.17 | 0.78 | 4.07E-10 |
| D3 | mi Xelaev18024130m.g | magi1.L             | N/B     | 13.75 | 19.86 | -5.52  | 0.74 | 1.21E-08 |

|    |                      |                   |          |       |       |        |      |          |
|----|----------------------|-------------------|----------|-------|-------|--------|------|----------|
| D3 | mi Xelaev18032047m.g | tox.L             | TOX      | 13.49 | 34.00 | 2.13   | 0.92 | 6.95E-19 |
| D3 | mi Xelaev18018185m.g | ccpg1.L           | CCPG1    | 13.22 | 25.91 | 6.91   | 0.86 | 9.25E-14 |
| D3 | mi Xelaev18035404m.g | foxr1.L           | TTC36    | 13.20 | 43.62 | 10.65  | 0.94 | 6.49E-21 |
| D3 | mi Xelaev18012516m.g | meaf6.L           | MEAF6    | 13.18 | 26.29 | -0.26  | 0.83 | 4.09E-12 |
| D3 | mi Xelaev18031585m.g | loc100145507.L    | ACD      | 13.14 | 34.80 | 3.08   | 0.85 | 4.81E-13 |
| D3 | mi Xelaev18017257m.g | dpysl3.L          | DPYSL3   | 13.11 | 13.86 | -11.82 | 0.79 | 1.99E-10 |
| D3 | mi Xelaev18047017m.g | ptprn.S           | PTPRN    | 13.11 | 26.07 | -2.01  | 0.62 | 8.04E-06 |
| D3 | mi Xelaev18040156m.g | max.L             | MAX      | 13.10 | 33.22 | 13.89  | 0.84 | 1.12E-12 |
| D3 | mi Xelaev18030676m.g | shh.L             | SHH      | 13.08 | 16.51 | -14.79 | 0.86 | 5.65E-14 |
| D3 | mi Xelaev18004576m.g | loc100486709.1.L  | ZNF71    | 13.06 | 29.83 | 2.36   | 0.74 | 7.96E-09 |
| D3 | mi Xelaev18024114m.g | tmf1.L            | TMF1     | 13.05 | 46.91 | 20.09  | 0.90 | 5.87E-17 |
| D3 | mi Xelaev18024949m.g | irf8.S            | IRF8     | 13.02 | 25.02 | 0.04   | 0.82 | 8.01E-12 |
| D3 | mi Xelaev18009309m.g | larp1b.S          | LARP1B   | 12.98 | 22.52 | 0.30   | 0.80 | 4.64E-11 |
| D3 | mi Xelaev18009937m.g | hcn2.S            | HCN2     | 12.96 | 20.20 | -3.44  | 0.85 | 4.20E-13 |
| D3 | mi Xelaev18043235m.g | calcoco2.L        | CALCOCO2 | 12.94 | 32.74 | 7.40   | 0.87 | 2.69E-14 |
| D3 | mi Xelaev18011934m.g | hip1.L            | HIP1     | 12.92 | 24.73 | -3.99  | 0.71 | 5.96E-08 |
| D3 | mi Xelaev18008037m.g | pam.L             | PAM      | 12.87 | 34.05 | 4.87   | 0.75 | 3.21E-09 |
| D3 | mi Xelaev18039731m.g | zfyve21.L         | ZFYVE21  | 12.84 | 30.48 | 0.70   | 0.83 | 3.83E-12 |
| D3 | mi Xelaev18021408m.g | dpysl3.S          | DPYSL3   | 12.78 | 24.74 | -4.41  | 0.90 | 1.27E-16 |
| D3 | mi Xelaev18008363m.g | slc1a3.L          | SLC1A3   | 12.64 | 16.55 | -11.63 | 0.86 | 7.06E-14 |
| D3 | mi Xelaev18026445m.g | Xelaev18026445m.g | GNMT     | 12.63 | 28.03 | 3.32   | 0.89 | 1.50E-15 |
| D3 | mi Xelaev18040152m.g | gphn.L            | GPHN     | 12.51 | 16.79 | -9.36  | 0.73 | 1.97E-08 |
| D3 | mi Xelaev18036996m.g | rufy2.S           | RUFY2    | 12.48 | 22.01 | -4.65  | 0.82 | 1.57E-11 |
| D3 | mi Xelaev18008873m.g | nelfa.S           | NELFA    | 12.43 | 37.28 | 13.45  | 0.90 | 5.35E-17 |
| D3 | mi Xelaev18046783m.g | foxk2.S           | FOXK2    | 12.43 | 48.43 | 28.03  | 0.90 | 7.61E-17 |
| D3 | mi Xelaev18027812m.g | atg4b.L           | ATG4B    | 12.36 | 27.46 | 2.53   | 0.77 | 1.48E-09 |

|    |                      |                     |          |       |       |        |      |          |
|----|----------------------|---------------------|----------|-------|-------|--------|------|----------|
| D3 | mi Xelaev18018816m.g | ddhd2.L             | DDHD2    | 12.35 | 32.94 | 6.34   | 0.73 | 2.10E-08 |
| D3 | mi Xelaev18015612m.g | loc100498409-like.S | IRS2     | 12.32 | 26.27 | 17.61  | 0.87 | 2.91E-14 |
| D3 | mi Xelaev18041778m.g | mecp2.S             | MECP2    | 12.23 | 38.90 | 13.27  | 0.93 | 4.39E-20 |
| D3 | mi Xelaev18025898m.g | Xelaev18025898m.g   | MGLL     | 12.08 | 20.05 | -6.33  | 0.84 | 7.39E-13 |
| D3 | mi Xelaev18041485m.g | Xelaev18041485m.g   | GLUL     | 11.99 | 27.32 | 4.51   | 0.83 | 3.92E-12 |
| D3 | mi Xelaev18021194m.g | gns.S               | GNS      | 11.98 | 27.30 | 1.03   | 0.73 | 1.47E-08 |
| D3 | mi Xelaev18005777m.g | ccser1.L            | CCSER1   | 11.95 | 18.25 | -8.40  | 0.85 | 2.16E-13 |
| D3 | mi Xelaev18012818m.g | cep97.L             | CEP97    | 11.93 | 18.16 | -6.29  | 0.77 | 1.10E-09 |
| D3 | mi Xelaev18022000m.g | ifitm1.L            | IFITM3   | 11.92 | 32.02 | 12.66  | 0.87 | 2.32E-14 |
| D3 | mi Xelaev18044773m.g | ube2e3.L            | UBE2E3   | 11.90 | 23.19 | 1.81   | 0.83 | 2.45E-12 |
| D3 | mi Xelaev18003631m.g | stau2.L             | STAU2    | 11.88 | 15.08 | -6.07  | 0.84 | 1.51E-12 |
| D3 | mi Xelaev18042526m.g | loc100487262.S      | N/B      | 11.81 | 23.31 | -2.23  | 0.77 | 1.04E-09 |
| D3 | mi Xelaev18037002m.g | herc4.S             | HERC4    | 11.80 | 29.99 | 3.89   | 0.88 | 5.38E-15 |
| D3 | mi Xelaev18011288m.g | loc100490688.L      | N/B      | 11.80 | 30.81 | 1.04   | 0.89 | 3.44E-16 |
| D3 | mi Xelaev18031822m.g | spire1.L            | SPIRE1   | 11.48 | 10.19 | -10.61 | 0.74 | 1.32E-08 |
| D3 | mi Xelaev18002750m.g | ranbp9.S            | RANBP9   | 11.33 | 33.58 | 6.66   | 0.84 | 7.39E-13 |
| D3 | mi Xelaev18035297m.g | ei24.L              | EI24     | 11.27 | 22.73 | -0.62  | 0.84 | 1.09E-12 |
| D3 | mi Xelaev18039269m.g | unnamed.L           | INAFM2   | 11.24 | 15.17 | -4.23  | 0.85 | 1.50E-13 |
| D3 | mi Xelaev18031909m.g | cables1.L           | CABLES1  | 11.17 | 25.74 | 1.05   | 0.83 | 1.99E-12 |
| D3 | mi Xelaev18022689m.g | fbxo31.L            | FBXO31   | 11.15 | 23.69 | -4.31  | 0.69 | 1.92E-07 |
| D3 | mi Xelaev18009157m.g | sap30.S             | SAP30    | 11.09 | 22.20 | -5.94  | 0.72 | 3.37E-08 |
| D3 | mi Xelaev18038264m.g | Xelaev18038264m.g   | GLUL     | 11.05 | 23.37 | 7.52   | 0.87 | 2.88E-14 |
| D3 | mi Xelaev18045282m.g | Xelaev18045282m.g   | PRKAR1B  | 11.05 | 22.66 | 5.77   | 0.80 | 1.16E-10 |
| D3 | mi Xelaev18015145m.g | c1orf216.S          | C1orf216 | 11.03 | 23.72 | 0.13   | 0.93 | 1.52E-19 |
| D3 | mi Xelaev18039066m.g | rtn2.L              | RTN2     | 11.02 | 26.95 | -0.61  | 0.77 | 9.79E-10 |
| D3 | mi Xelaev18009202m.g | gucy1b3.S           | GUCY1B1  | 11.01 | 11.25 | -8.61  | 0.91 | 9.85E-18 |

|     |                      |               |          |       |       |        |      |          |
|-----|----------------------|---------------|----------|-------|-------|--------|------|----------|
| D3  | mi Xelaev18044963m.g | loc200726.L   | FAM237A  | 10.96 | 12.04 | -10.17 | 0.75 | 3.60E-09 |
| D3  | mi Xelaev18018391m.g | arrdc4.L      | ARRDC4   | 10.91 | 15.03 | -3.44  | 0.84 | 8.66E-13 |
| D3  | mi Xelaev18006303m.g | ranbp3.L      | RANBP3   | 10.88 | 12.50 | -14.69 | 0.82 | 1.39E-11 |
| D3  | mi Xelaev18034012m.g | loc549366.S   | ADCY8    | 10.79 | 16.31 | -7.36  | 0.91 | 1.71E-17 |
| D3  | mi Xelaev18038329m.g | col5a1-like.L | COL5A1   | 10.78 | 19.74 | 4.74   | 0.73 | 2.10E-08 |
| D3  | mi Xelaev18012348m.g | st7l.L        | ST7      | 10.74 | 17.59 | -8.52  | 0.66 | 9.27E-07 |
| D3  | mi Xelaev18044582m.g | galnt13.L     | GALNT13  | 10.72 | 10.71 | -12.17 | 0.81 | 2.35E-11 |
| D3  | mi Xelaev18019772m.g | mkrn1.S       | MKRN1    | 10.70 | 31.65 | 11.76  | 0.79 | 2.43E-10 |
| D3  | mi Xelaev18030834m.g | olah.L        | OLAH     | 10.69 | 15.90 | -11.31 | 0.83 | 3.24E-12 |
| D3  | mi Xelaev18022646m.g | crispld2.L    | CRISPLD2 | 10.68 | 12.51 | -11.79 | 0.76 | 2.62E-09 |
| D3  | mi Xelaev18021032m.g | mapk11.S      | MAPK11   | 10.60 | 17.76 | -6.45  | 0.74 | 1.26E-08 |
| D3  | mi Xelaev18016996m.g | apbb3.L       | APBB3    | 10.54 | 10.42 | -10.73 | 0.77 | 1.26E-09 |
| D3  | mi Xelaev18042435m.g | agpat1.S      | AGPAT1   | 10.51 | 23.51 | -4.95  | 0.91 | 1.62E-17 |
| D3  | mi Xelaev18034639m.g | calhm2.L      | CALHM2   | 10.44 | 15.00 | -7.98  | 0.70 | 1.59E-07 |
| D3  | mi Xelaev18018604m.g | vamp5.L       | N/B      | 10.42 | 15.34 | -6.91  | 0.81 | 1.94E-11 |
| D3  | mi Xelaev18029866m.g | scg2.S        | SCG2     | 10.41 | 21.15 | -5.78  | 0.78 | 3.83E-10 |
| D3  | mi Xelaev18035814m.g | tprg1l.L      | TPRG1L   | 10.29 | 16.32 | -3.52  | 0.81 | 3.83E-11 |
| D3  | mi Xelaev18036859m.g | bnip3.S       | BNIP3    | 10.27 | 37.21 | 13.96  | 0.82 | 6.69E-12 |
| D3  | mi Xelaev18024381m.g | ccdc34.S      | CCDC34   | 10.19 | 41.47 | 14.92  | 0.84 | 1.01E-12 |
| D3  | mi Xelaev18005303m.g | aasdh.L       | AASDH    | 10.18 | 12.43 | -9.87  | 0.71 | 5.89E-08 |
| D3  | mi Xelaev18030216m.g | pnoc.S        | PNOC     | 10.01 | 26.21 | 1.77   | 0.70 | 9.57E-08 |
| N/C | mi Xelaev18037618m.g | uts2.S        | N/B      | 34.97 | 37.09 | -6.82  | 0.69 | 1.75E-07 |
| N/C | mi Xelaev18033631m.g | adcyp1.S      | N/B      | 34.14 | 39.12 | -6.50  | 0.36 | 1.66E-02 |
| N/C | mi Xelaev18000856m.g | vgf.S         | SPRR3    | 33.74 | 52.38 | 8.88   | 0.68 | 4.28E-07 |
| N/C | mi Xelaev18044679m.g | gad1.1.L      | GAD1     | 32.38 | 16.99 | -10.61 | 0.59 | 3.00E-05 |
| N/C | mi Xelaev18021983m.g | bdnf.L        | BDNF     | 31.66 | 51.25 | 0.35   | 0.29 | 5.67E-02 |

|     |                      |                   |         |       |       |        |      |          |
|-----|----------------------|-------------------|---------|-------|-------|--------|------|----------|
| N/C | mi Xelaev18019171m.g | vgf.L             | SPRR3   | 30.33 | 52.84 | 5.22   | 0.53 | 2.01E-04 |
| N/C | mi Xelaev18041279m.g | atg2b.S           | ATG2B   | 29.88 | 30.97 | 10.73  | 0.86 | 9.00E-14 |
| N/C | mi Xelaev18014203m.g | tax1bp3.S         | TAX1BP3 | 28.29 | 22.81 | -7.68  | 0.64 | 3.34E-06 |
| N/C | mi Xelaev18026850m.g | Xelaev18026850m.g | N/B     | 27.61 | 30.71 | -6.56  | 0.60 | 1.79E-05 |
| N/C | mi Xelaev18024853m.g | rnf166.S          | RNF166  | 27.22 | 34.24 | 8.89   | 0.79 | 1.28E-10 |
| N/C | mi Xelaev18025274m.g | rab3b.S           | RAB3C   | 27.09 | 17.94 | -11.25 | 0.40 | 6.88E-03 |
| N/C | mi Xelaev18031550m.g | kdsr.L            | KDSR    | 26.87 | 23.44 | 4.79   | 0.69 | 2.60E-07 |
| N/C | mi Xelaev18029077m.g | pde10a.S          | PDE10A  | 26.62 | 38.02 | 3.50   | 0.44 | 2.76E-03 |
| N/C | mi Xelaev18027491m.g | uts2b.L           | UTS2B   | 26.21 | 18.26 | -3.91  | 0.50 | 5.45E-04 |
| N/C | mi Xelaev18042546m.g | tgfb1.S           | TGFB1   | 26.04 | 21.86 | -9.96  | 0.60 | 1.93E-05 |
| N/C | mi Xelaev18010396m.g | ube3b.S           | UBE3B   | 25.44 | 38.83 | 14.12  | 0.89 | 1.30E-15 |
| N/C | mi Xelaev18027794m.g | scg2.L            | SCG2    | 25.31 | 27.36 | -11.66 | 0.60 | 1.53E-05 |
| N/C | mi Xelaev18041090m.g | ltk.S             | ALK     | 25.08 | 33.55 | -11.84 | 0.55 | 9.46E-05 |
| N/C | mi Xelaev18012481m.g | ptpru.L           | N/B     | 23.89 | 32.56 | 1.23   | 0.81 | 1.97E-11 |
| N/C | mi Xelaev18026851m.g | pde10a.L          | PDE10A  | 23.78 | 30.27 | -1.54  | 0.56 | 9.16E-05 |
| N/C | mi Xelaev18017782m.g | lrrc17.L          | LRRC17  | 22.99 | 35.67 | -2.70  | 0.07 | 6.31E-01 |
| N/C | mi Xelaev18009174m.g | loc100488610.S    | TRIM63  | 22.67 | 15.07 | -9.53  | 0.61 | 1.19E-05 |
| N/C | mi Xelaev18045869m.g | fkbp10.S          | FKBP10  | 22.59 | 30.22 | -0.62  | 0.81 | 3.49E-11 |
| N/C | mi Xelaev18045012m.g | slc40a1.L         | N/B     | 22.44 | 28.86 | 0.92   | 0.70 | 1.54E-07 |
| N/C | mi Xelaev18024627m.g | calca.S           | N/B     | 22.28 | 36.02 | 0.96   | 0.42 | 4.23E-03 |
| N/C | mi Xelaev18024895m.g | tat.S             | TAT     | 22.14 | 53.86 | 16.01  | 0.17 | 2.70E-01 |
| N/C | mi Xelaev18010810m.g | pcsk1.S           | PCSK1   | 21.68 | 29.00 | -3.01  | 0.82 | 1.15E-11 |
| N/C | mi Xelaev18012734m.g | fam101b.L         | RFLNB   | 21.62 | 41.30 | -1.67  | 0.57 | 6.35E-05 |
| N/C | mi Xelaev18047821m.g | rhbdl1.S          | RHBDL1  | 21.37 | 19.92 | -5.51  | 0.76 | 1.54E-09 |
| N/C | mi Xelaev18025674m.g | Xelaev18025674m.g | CYP2D6  | 20.94 | 41.38 | 7.05   | 0.50 | 5.46E-04 |
| N/C | mi Xelaev18025227m.g | pik3r3.S          | PIK3R3  | 20.90 | 29.25 | -5.82  | 0.38 | 1.02E-02 |

|     |                      |                   |          |       |       |        |      |          |
|-----|----------------------|-------------------|----------|-------|-------|--------|------|----------|
| N/C | mi Xelaev18039619m.g | l2hgdh.L          | L2HGDH   | 20.57 | 23.77 | -7.67  | 0.63 | 4.90E-06 |
| N/C | mi Xelaev18033026m.g | hdac9.S           | HDAC9    | 20.45 | 33.97 | -5.97  | 0.49 | 7.07E-04 |
| N/C | mi Xelaev18019340m.g | Xelaev18019340m.g | TNFSF13  | 20.32 | 19.13 | -5.73  | 0.73 | 2.34E-08 |
| N/C | mi Xelaev18046721m.g | rnf157.S          | RNF157   | 20.14 | 24.78 | -3.65  | 0.55 | 1.08E-04 |
| N/C | mi Xelaev18012753m.g | ccl42c.L          | CCL4L1   | 19.87 | 18.37 | -9.46  | 0.44 | 2.71E-03 |
| N/C | mi Xelaev18043779m.g | Xelaev18043779m.g | N/B      | 19.80 | 28.86 | -0.38  | 0.66 | 8.65E-07 |
| N/C | mi Xelaev18017537m.g | mdm1.L            | N/B      | 19.53 | 30.99 | -1.13  | 0.66 | 8.75E-07 |
| N/C | mi Xelaev18047374m.g | gpr1.S            | GPR1     | 19.53 | 17.00 | 0.00   | 0.51 | 4.36E-04 |
| N/C | mi Xelaev18035721m.g | loc100490200.L    | MS4A4A   | 19.50 | 33.09 | 15.16  | 0.45 | 2.45E-03 |
| N/C | mi Xelaev18004059m.g | gale.S            | GALE     | 19.40 | 22.88 | -0.02  | 0.59 | 2.41E-05 |
| N/C | mi Xelaev18005353m.g | cfap97.L          | CFAP97   | 19.24 | 29.60 | -3.24  | 0.67 | 7.17E-07 |
| N/C | mi Xelaev18023083m.g | tesk2.L           | TESK2    | 19.18 | 13.61 | 2.36   | 0.56 | 8.38E-05 |
| N/C | mi Xelaev18029914m.g | klhl24.S          | KLHL24   | 18.88 | 35.60 | 10.42  | 0.82 | 9.76E-12 |
| N/C | mi Xelaev18031024m.g | galnt15.L         | GALNT15  | 18.73 | 27.79 | -1.70  | 0.45 | 2.28E-03 |
| N/C | mi Xelaev18044419m.g | Xelaev18044419m.g | N/B      | 18.56 | 15.58 | -10.81 | 0.09 | 5.65E-01 |
| N/C | mi Xelaev18021912m.g | abtb2.L           | ABTB2    | 18.44 | 34.07 | -7.45  | 0.51 | 3.54E-04 |
| N/C | mi Xelaev18025320m.g | pappa2.S          | PAPPA2   | 18.16 | 10.37 | -8.89  | 0.68 | 3.35E-07 |
| N/C | mi Xelaev18015389m.g | gtf2ird1.S        | GTF2IRD1 | 18.12 | 23.10 | 2.48   | 0.75 | 6.63E-09 |
| N/C | mi Xelaev18017943m.g | tymp.L            | TYMP     | 18.09 | 10.69 | -10.25 | 0.73 | 1.87E-08 |
| N/C | mi Xelaev18012650m.g | rps6kb1.L         | RPS6KB1  | 17.97 | 18.00 | -9.67  | 0.65 | 1.65E-06 |
| N/C | mi Xelaev18039744m.g | inf2.L            | INF2     | 17.63 | 14.00 | -10.88 | 0.66 | 1.23E-06 |
| N/C | mi Xelaev18019513m.g | loc100485200.L    | SPAG7    | 17.60 | 28.75 | 1.13   | 0.67 | 6.74E-07 |
| N/C | mi Xelaev18030764m.g | gad2.L            | GAD2     | 17.48 | 10.01 | -7.01  | 0.53 | 2.23E-04 |
| N/C | mi Xelaev18017207m.g | prelid2.L         | PRELID2  | 17.41 | 40.53 | 18.38  | 0.65 | 1.84E-06 |
| N/C | mi Xelaev18035643m.g | ankrd65.L         | ANK3     | 17.02 | 11.77 | -12.21 | 0.49 | 7.81E-04 |
| N/C | mi Xelaev18025232m.g | lrrc41.S          | LRRC41   | 16.74 | 14.85 | 0.92   | 0.48 | 9.18E-04 |

|     |                      |                   |          |       |       |        |      |            |
|-----|----------------------|-------------------|----------|-------|-------|--------|------|------------|
| N/C | mi Xelaev18021270m.g | mon2.S            | MON2     | 16.52 | 37.33 | 12.17  | 0.82 | 1.16E-11   |
| N/C | mi Xelaev18009688m.g | prdm8.S           | PRDM8    | 16.15 | 29.41 | -7.43  | 0.69 | 2.00E-07   |
| N/C | mi Xelaev18010938m.g | srek1.S           | SREK1    | 16.15 | 27.17 | -2.32  | 0.69 | 2.38E-07   |
| N/C | mi Xelaev18006943m.g | isca1.L           | ISCA1    | 16.10 | 16.49 | -6.03  | 0.61 | 9.71E-06   |
| N/C | mi Xelaev18046744m.g | Xelaev18046744m.g | SEC14L1  | 15.94 | 23.97 | 2.01   | 0.72 | 4.28E-08   |
| N/C | mi Xelaev18045380m.g | ears2.L           | EARS2    | 15.83 | 22.89 | -10.05 | 0.39 | - 9.16E-03 |
| N/C | mi Xelaev18044295m.g | crlf3.L           | N/B      | 15.65 | 13.72 | -11.94 | 0.66 | - 1.29E-06 |
| N/C | mi Xelaev18047571m.g | gpr146.S          | GPR146   | 15.65 | 29.97 | 1.55   | 0.63 | 3.83E-06   |
| N/C | mi Xelaev18007536m.g | prodh.L           | PRODH    | 15.50 | 10.21 | -7.01  | 0.49 | 7.31E-04   |
| N/C | mi Xelaev18029196m.g | gja1.S            | GJA1     | 15.34 | 16.74 | -8.80  | 0.56 | 8.91E-05   |
| N/C | mi Xelaev18023116m.g | pik3r3.L          | PIK3R3   | 15.32 | 29.52 | 4.10   | 0.38 | - 1.02E-02 |
| N/C | mi Xelaev18005623m.g | cyp2u1.L          | CYP2U1   | 15.32 | 40.66 | 15.36  | 0.81 | 3.77E-11   |
| N/C | mi Xelaev18044478m.g | ptprn.L           | PTPRN    | 15.23 | 28.27 | -3.70  | 0.56 | 7.50E-05   |
| N/C | mi Xelaev18009061m.g | pdgfra.S          | PDGFRA   | 15.16 | 42.21 | 15.77  | 0.29 | 5.67E-02   |
| N/C | mi Xelaev18033468m.g | cdh20.S           | CDH20    | 15.15 | 22.96 | -9.35  | 0.71 | 8.94E-08   |
| N/C | mi Xelaev18044420m.g | igfbp5.L          | IGFBP5   | 15.05 | 19.18 | -9.07  | 0.55 | 9.66E-05   |
| N/C | mi Xelaev18022519m.g | cyld.L            | CYLD     | 14.79 | 18.88 | -9.17  | 0.48 | 8.53E-04   |
| N/C | mi Xelaev18028179m.g | loc100490476.L    | CYP2E1   | 14.50 | 25.22 | 3.55   | 0.51 | 4.34E-04   |
| N/C | mi Xelaev18042490m.g | agbl5.S           | AGBL5    | 14.48 | 40.55 | 16.09  | 0.69 | 2.89E-07   |
| N/C | mi Xelaev18039589m.g | atg2b.L           | ATG2B    | 14.42 | 31.84 | 11.39  | 0.76 | 2.47E-09   |
| N/C | mi Xelaev18013574m.g | calcoco1.L        | CALCOCO1 | 14.28 | 24.50 | 4.65   | 0.72 | 4.63E-08   |
| N/C | mi Xelaev18023821m.g | rbm5.L            | RBM5     | 14.28 | 12.85 | -12.52 | 0.64 | 2.91E-06   |
| N/C | mi Xelaev18025679m.g | sgsm3.S           | SGSM3    | 13.98 | 23.92 | -12.23 | 0.55 | 1.16E-04   |
| N/C | mi Xelaev18007949m.g | megf10.L          | MEGF10   | 13.88 | 12.57 | -10.72 | 0.74 | 8.61E-09   |
| N/C | mi Xelaev18006473m.g | ell.L             | ELL      | 13.85 | 22.57 | -6.63  | 0.76 | 3.15E-09   |
| N/C | mi Xelaev18000112m.g | srsf10.L          | SRSF10   | 13.69 | 40.52 | 11.38  | 0.65 | - 1.79E-06 |

|     |                      |                   |          |       |       |        |      |          |
|-----|----------------------|-------------------|----------|-------|-------|--------|------|----------|
| N/C | mi Xelaev18047074m.g | acvr2a.S          | ACVR2A   | 13.59 | 31.71 | 5.60   | 0.61 | 9.14E-06 |
| N/C | mi Xelaev18012160m.g | srsf1.L           | SRSF1    | 13.46 | 15.46 | -9.18  | 0.69 | 1.71E-07 |
| N/C | mi Xelaev18038608m.g | brinp1.L          | BRINP1   | 13.44 | 34.14 | 10.24  | 0.75 | 5.72E-09 |
| N/C | mi Xelaev18035487m.g | sik2.L            | SIK2     | 13.41 | 18.42 | -13.30 | 0.31 | 4.38E-02 |
| N/C | mi Xelaev18036794m.g | slc16a9.S         | SLC16A9  | 13.41 | 28.88 | 4.49   | 0.39 | 8.19E-03 |
| N/C | mi Xelaev18020935m.g | bend7.S           | BEND7    | 13.37 | 24.92 | -3.56  | 0.68 | 4.57E-07 |
| N/C | mi Xelaev18040411m.g | anp32e.L          | ANP32E   | 13.08 | 21.05 | 1.37   | 0.67 | 7.99E-07 |
| N/C | mi Xelaev18037778m.g | nosip.S           | NOSIP    | 13.04 | 21.11 | -2.53  | 0.64 | 2.64E-06 |
| N/C | mi Xelaev18029630m.g | tnk2.S            | TNK2     | 12.88 | 10.65 | -11.86 | 0.72 | 3.55E-08 |
| N/C | mi Xelaev18025082m.g | Xelaev18025082m.g | N/B      | 12.86 | 10.30 | -12.34 | 0.43 | 3.76E-03 |
| N/C | mi Xelaev18044491m.g | fam134a.L         | RETREG2  | 12.83 | 10.72 | 3.13   | 0.56 | 8.25E-05 |
| N/C | mi Xelaev18008583m.g | kiaa1161.L        | MYORG    | 12.75 | 10.11 | -7.60  | 0.71 | 8.83E-08 |
| N/C | mi Xelaev18021962m.g | tcp111.L          | TCP111L  | 12.75 | 40.01 | 7.12   | 0.65 | 1.65E-06 |
| N/C | mi Xelaev18020738m.g | cpeb1.S           | CPEB1    | 12.68 | 14.44 | -5.41  | 0.50 | 4.75E-04 |
| N/C | mi Xelaev18034804m.g | sorbs1-like.L     | SORBS1   | 12.55 | 13.70 | -8.53  | 0.57 | 5.38E-05 |
| N/C | mi Xelaev18020780m.g | lox1.S            | LOXL1    | 12.33 | 25.81 | -2.01  | 0.70 | 1.32E-07 |
| N/C | mi Xelaev18005717m.g | slc9b2.L          | SLC9B2   | 12.24 | 23.15 | -2.07  | 0.60 | 1.53E-05 |
| N/C | mi Xelaev18023654m.g | nptxr.L           | NPTXR    | 12.24 | 16.19 | -5.37  | 0.63 | 4.18E-06 |
| N/C | mi Xelaev18009631m.g | lmnb2.S           | N/B      | 12.22 | 21.29 | -4.07  | 0.64 | 3.30E-06 |
| N/C | mi Xelaev18024457m.g | ccnd1.S           | N/B      | 12.16 | 15.00 | -8.58  | 0.42 | 4.45E-03 |
| N/C | mi Xelaev18044942m.g | Xelaev18044942m.g | FZD7     | 12.16 | 27.86 | -1.85  | 0.49 | 7.67E-04 |
| N/C | mi Xelaev18024383m.g | bdnf.S            | BDNF     | 12.14 | 40.50 | 6.20   | 0.24 | 1.17E-01 |
| N/C | mi Xelaev18026765m.g | c1orf131.L        | C1orf131 | 12.11 | 31.92 | 5.71   | 0.59 | 2.43E-05 |
| N/C | mi Xelaev18043763m.g | ccdc57.L          | CCDC57   | 12.00 | 33.37 | 17.22  | 0.62 | 8.78E-06 |
| N/C | mi Xelaev18002080m.g | tmem100.S         | TMEM100  | 11.96 | 25.99 | -4.46  | 0.29 | 5.58E-02 |
| N/C | mi Xelaev18033864m.g | tmem55a.S         | PIP4P2   | 11.93 | 24.35 | 1.65   | 0.67 | 7.16E-07 |



|     |                      |                     |          |       |       |        |      |          |
|-----|----------------------|---------------------|----------|-------|-------|--------|------|----------|
| N/C | mi Xelaev18014958m.g | klf15.2.S           | KLF15    | 11.85 | 18.03 | -6.15  | 0.72 | 4.53E-08 |
| N/C | mi Xelaev18040965m.g | kcnj10.L            | KCNJ10   | 11.79 | 28.48 | 12.22  | -    | 1.02E-05 |
| N/C | mi Xelaev18037363m.g | sik2.S              | SIK2     | 11.69 | 23.92 | 0.49   | 0.27 | 7.58E-02 |
| N/C | mi Xelaev18023501m.g | Xelaev18023501m.g   | PMM1     | 11.63 | 10.86 | -6.77  | 0.54 | 1.65E-04 |
| N/C | mi Xelaev18007479m.g | loc100493091.L      | N/B      | 11.62 | 31.73 | 12.65  | 0.49 | 6.42E-04 |
| N/C | mi Xelaev18015803m.g | nr4a1.S             | NR4A1    | 11.57 | 17.90 | -9.61  | 0.12 | 4.35E-01 |
| N/C | mi Xelaev18016415m.g | serpinh1.S          | SERPINH1 | 11.52 | 37.33 | 22.24  | -    | 8.12E-03 |
| N/C | mi Xelaev18011332m.g | ildr2.L             | ILDR2    | 11.51 | 19.02 | -11.38 | 0.42 | 4.45E-03 |
| N/C | mi Xelaev18032906m.g | msrb2.S             | N/B      | 11.51 | 24.47 | -1.66  | 0.59 | 2.19E-05 |
| N/C | mi Xelaev18035124m.g | loc101731425.L      | CENPQ    | 11.50 | 28.26 | 13.23  | 0.43 | 3.44E-03 |
| N/C | mi Xelaev18006194m.g | mex3d.L             | MEX3D    | 11.41 | 15.32 | -0.93  | -    | 1.85E-06 |
| N/C | mi Xelaev18024009m.g | slc26a6.L           | SLC26A6  | 11.37 | 23.83 | -1.68  | 0.60 | 1.44E-05 |
| N/C | mi Xelaev18046933m.g | pdia5.S             | PDIA5    | 11.36 | 15.78 | -4.30  | -    | 5.79E-06 |
| N/C | mi Xelaev18007376m.g | parp2.L             | PARP2    | 11.32 | 12.80 | -5.80  | 0.40 | 7.89E-03 |
| N/C | mi Xelaev18012623m.g | Xelaev18012623m.g   | VAV1     | 11.22 | 17.10 | 2.79   | -    | 8.72E-04 |
| N/C | mi Xelaev18025198m.g | tesk2.S             | TESK2    | 11.19 | 10.91 | 3.05   | 0.61 | 1.26E-05 |
| N/C | mi Xelaev18018232m.g | shc4.L              | SHC4     | 11.14 | 39.75 | 3.18   | 0.11 | 4.77E-01 |
| N/C | mi Xelaev18012198m.g | dyrk3.L             | DYRK3    | 11.13 | 23.99 | 1.10   | 0.63 | 5.13E-06 |
| N/C | mi Xelaev18039468m.g | ift43.L             | IFT43    | 11.12 | 16.17 | -1.49  | 0.45 | 2.00E-03 |
| N/C | mi Xelaev18022661m.g | mphosph6.L          | MPHOSPH6 | 11.06 | 23.95 | 4.71   | -    | 4.62E-06 |
| N/C | mi Xelaev18036704m.g | emg1.S              | N/B      | 10.99 | 26.23 | 0.20   | -    | 2.78E-08 |
| N/C | mi Xelaev18010363m.g | thoc5.S             | THOC5    | 10.95 | 13.14 | -3.72  | 0.69 | 2.01E-07 |
| N/C | mi Xelaev18017582m.g | lrig3.L             | LRIG3    | 10.69 | 10.57 | -6.90  | 0.39 | 8.61E-03 |
| N/C | mi Xelaev18016973m.g | loc100489356-like.L | FBXL3    | 10.67 | 12.68 | -9.39  | 0.59 | 2.70E-05 |
| N/C | mi Xelaev18042541m.g | cyp2c18.S           | CYP2C8   | 10.66 | 22.06 | -5.10  | 0.59 | 2.70E-05 |
| N/C | mi Xelaev18017340m.g | brd8.L              | BRD8     | 10.63 | 43.52 | 23.26  | 0.70 | 1.32E-07 |

|     |                      |                |          |       |       |       |      |          |
|-----|----------------------|----------------|----------|-------|-------|-------|------|----------|
| N/C | mi Xelaev18018281m.g | efl1.L         | EFL1     | 10.56 | 20.42 | -3.86 | -    | 2.26E-02 |
| N/C | mi Xelaev18021645m.g | cdkn2d.S       | CDKN2D   | 10.55 | 15.72 | -4.06 | 0.48 | 1.06E-03 |
| N/C | mi Xelaev18045261m.g | c7orf50.L      | C7orf50  | 10.47 | 19.32 | -7.94 | -    | 1.79E-04 |
| N/C | mi Xelaev18036648m.g | fam160b1.S     | FAM160B1 | 10.29 | 29.88 | 12.86 | 0.64 | 2.34E-06 |
| N/C | mi Xelaev18005843m.g | slc4a4.L       | SLC4A4   | 10.28 | 11.36 | -9.19 | 0.41 | 6.08E-03 |
| N/C | mi Xelaev18037093m.g | p4ha1-like.1.S | P4HA1    | 10.20 | 24.68 | -0.70 | -    | 3.51E-04 |
| N/C | mi Xelaev18026664m.g | cdc42ep3.L     | CDC42EP3 | 10.10 | 20.29 | -5.13 | -    | 8.71E-05 |

MM Module Membership  
p.MM statistical significance of MM  
N/C non-clustered gene

- 1
- 2
- 3
- 4
- 5
- 6
- 7
- 8
- 9
- 10
- 11
- 12
- 13
- 14
- 15

**Supplementary Table S3 - GO Enrichment results, Molecular function**

| Module | GO ID      | GO Description                                                                                                 | pvalue   | Count | Genes                                                                                 | Gene Module Ratio | Go term Ratio | $\Sigma$ BIC | x-value | GO term cluster |
|--------|------------|----------------------------------------------------------------------------------------------------------------|----------|-------|---------------------------------------------------------------------------------------|-------------------|---------------|--------------|---------|-----------------|
| E1     | GO:0070412 | R-SMAD binding                                                                                                 | 4.11E-09 | 6     | fos.S, fos.L, loc100490871-like.L, loc100490871-like.S, jun.L, jun.S                  | 0.13              | 0.09          | 241.38       | 2024.25 | 0               |
| E1     | GO:0001046 | core promoter sequence-specific DNA binding                                                                    | 9.77E-08 | 8     | fos.S, fos.L, loc100490871-like.L, loc100490871-like.S, egr1.L, myc.S, myc.L, klf10.S | 0.17              | 0.03          | 248.07       | 1739.00 | 1               |
| E1     | GO:0001227 | transcriptional repressor activity RNA polymerase II transcription regulatory region sequence-specific binding | 1.33E-04 | 6     | btg2.S, nfkbia.L, ets2.L, atf3.S, bhlhe40.L, hes1.L                                   | 0.13              | 0.01          | 111.27       | 431.22  | 2               |
| E2     | GO:0042979 | ornithine decarboxylase regulator activity                                                                     | 4.60E-06 | 3     | odc1.S, azin1.S, azin2.S                                                              | 0.04              | 0.27          | 90.96        | 485.52  | -1              |
| E2     | GO:0015057 | thrombin-activated receptor activity                                                                           | 5.09E-04 | 2     | Xelaev1801090 1m.g, Xelaev1800817 8m.g                                                | 0.03              | 0.18          | 36.40        | 119.86  | -1              |
| I1     | GO:0048018 | receptor ligand activity                                                                                       | 3.96E-04 | 13    | wnt5a.S, timp-1.L, manf.L, timp-1.S, ccl34.S, metrn1.S, sema3b.S, sfrp2.L, metrn1.L,  | 0.06              | 0.03          | 737.61       | 2509.35 | 0               |

|    |            |                                                |              |    |                                                                                                                                                      |      |      |        |         |   |
|----|------------|------------------------------------------------|--------------|----|------------------------------------------------------------------------------------------------------------------------------------------------------|------|------|--------|---------|---|
|    |            |                                                |              |    | inhba.L,<br>hbegf.S, grp.L,<br>tnfrsf11b.S                                                                                                           |      |      |        |         |   |
| l1 | GO:0005178 | integrin<br>binding                            | 3.58E-<br>04 | 9  | itgb6.L, itgb1.L,<br>s1pr5.L, itga2.L,<br>kdr.L, sfrp2.L,<br>egfl6.S, thbs1.S,<br>actn1.S                                                            | 0.04 | 0.04 | 526.24 | 1813.46 | 1 |
| l1 | GO:0004252 | serine-type<br>endopeptidas<br>e activity      | 1.80E-<br>03 | 7  | mmp13.S,<br>prss23.S,<br>mmp19.L,<br>mst1.L, plat.L,<br>loc100493411.<br>S, prtn3.S                                                                  | 0.03 | 0.04 | 320.69 | 880.04  | 2 |
| l3 | GO:0030515 | snoRNA<br>binding                              | 1.57E-<br>13 | 11 | nop58.L,<br>nop58.S,<br>diexf.L, tbl3.L,<br>nop56.L, tsr1.L,<br>nhp2.L, diexf.S,<br>dkc1.L, pwp2.S,<br>bms1.L                                        | 0.05 | 0.27 | 484.40 | 6201.67 | 0 |
| l3 | GO:0001094 | TFIID-class<br>transcription<br>factor binding | 3.90E-<br>09 | 6  | fbl.L, nop58.L,<br>nop58.S,<br>ruvbl1.S,<br>ruvbl1.L, fbl.S                                                                                          | 0.03 | 0.40 | 300.60 | 2527.55 | 1 |
| l3 | GO:0008173 | RNA<br>methyltransfe<br>rase activity          | 1.42E-<br>08 | 10 | fbl.L, nop2.L,<br>nsun2.S, ftsj3.L,<br>prmt5.S,<br>setd6.L, fbl.S,<br>mettl13.S,<br>thumpd3.L,<br>Xelaev1801909<br>4m.g                              | 0.04 | 0.11 | 306.13 | 2402.56 | 2 |
| l3 | GO:0004386 | helicase<br>activity                           | 2.17E-<br>07 | 13 | EIF4A1.L,<br>DDX27.L,<br>EIF4A1.S,<br>RUVBL1.S,<br>DDX24.L,<br>RUVBL1.L,<br>DHX37.L,<br>G3BP1.L,<br>G3BP1.S,<br>SMARCA5.L,<br>DHX38.L,<br>SMARCA5.S, | 0.06 | 0.06 | 487.38 | 3248.15 | 3 |

|    |            |                                                                                                    |          |    |                                                                                                                                             |      |      |        |         |    |
|----|------------|----------------------------------------------------------------------------------------------------|----------|----|---------------------------------------------------------------------------------------------------------------------------------------------|------|------|--------|---------|----|
|    |            |                                                                                                    |          |    | c10orf2.L                                                                                                                                   |      |      |        |         |    |
| I3 | GO:0000049 | tRNA binding                                                                                       | 2.10E-06 | 8  | Xelaev1801263<br>0m.g, xpot.S,<br>farsa.S,<br>nsun2.S,<br>farsa.L,<br>thumpd3.L,<br>Xelaev1801909<br>4m.g, ssb.S                            | 0.03 | 0.09 | 217.36 | 1233.98 | 4  |
| I3 | GO:0004004 | ATP-<br>dependent<br>RNA helicase<br>activity                                                      | 2.51E-06 | 8  | eif4a1.L,<br>ddx27.L,<br>eif4a1.S,<br>ddx24.L,<br>dhx37.L,<br>g3bp1.L,<br>g3bp1.S,<br>dhx38.L                                               | 0.03 | 0.09 | 329.79 | 1847.19 | 5  |
| I3 | GO:0140101 | catalytic<br>activity acting<br>on a tRNA                                                          | 3.50E-06 | 11 | farsa.S,<br>nsun2.S, ftsj3.L,<br>prmt5.S,<br>pdcl3.L, farsa.L,<br>sgpp2.L,<br>setd6.L,<br>mettl13.S,<br>thumpd3.L,<br>Xelaev1801909<br>4m.g | 0.05 | 0.06 | 304.58 | 1661.76 | 6  |
| I3 | GO:0016671 | oxidoreductase<br>activity<br>acting on a<br>sulfur group of<br>donors<br>disulfide as<br>acceptor | 6.92E-05 | 4  | dnajc10.S,<br>txnl1.S, txnl1.L,<br>pdia3.L                                                                                                  | 0.02 | 0.17 | 94.23  | 391.96  | 7  |
| I3 | GO:0140097 | catalytic<br>activity acting<br>on DNA                                                             | 2.36E-04 | 11 | hmga2.S,<br>ruvbl1.S,<br>ruvbl1.L, ftsj3.L,<br>g3bp1.L,<br>g3bp1.S,<br>dkc1.L,<br>prmt5.S,<br>smarca5.L,<br>smarca5.S,<br>c10orf2.L         | 0.05 | 0.04 | 362.63 | 1315.14 | -1 |

|    |            |                                                                   |          |    |                                                                                                                                                         |      |      |        |         |    |
|----|------------|-------------------------------------------------------------------|----------|----|---------------------------------------------------------------------------------------------------------------------------------------------------------|------|------|--------|---------|----|
| I3 | GO:0003729 | mRNA binding                                                      | 7.72E-04 | 12 | Xelaev1801263<br>0m.g, eif4a1.L,<br>eif4a1.S,<br>g3bp1.L,<br>g3bp1.S, nifk.S,<br>syncrip.S,<br>syncrip.L,<br>ncbp2.L,<br>kiaa0020.S,<br>ssb.S, elavl1.S | 0.05 | 0.03 | 424.33 | 1320.69 | -1 |
| D1 | GO:0015081 | sodium ion<br>transmembrane<br>transporter<br>activity            | 4.09E-03 | 5  | Xelaev1800181<br>5m.g,<br>Xelaev1800257<br>2m.g, slc5a7.S,<br>pkd2.L, slc5a7.L                                                                          | 0.05 | 0.02 | 140.65 | 335.97  | 0  |
| D1 | GO:0031493 | nucleosomal<br>histone<br>binding                                 | 9.19E-04 | 2  | uhrf2.L, uhrf2.S                                                                                                                                        | 0.02 | 0.20 | 49.97  | 151.75  | -1 |
| D1 | GO:0005007 | fibroblast<br>growth factor-<br>activated<br>receptor<br>activity | 1.12E-03 | 2  | fgfr3.S, fgfr2.S                                                                                                                                        | 0.02 | 0.18 | 60.50  | 178.51  | -1 |
| D2 | GO:0070513 | death domain<br>binding                                           | 2.45E-05 | 3  | dapl1.S,<br>loc100489885.<br>S, dapl1.L                                                                                                                 | 0.04 | 0.18 | 44.00  | 202.83  | 0  |
| D2 | GO:0016791 | phosphatase<br>activity                                           | 1.11E-03 | 7  | pfkfb1.S,<br>ppp1r15a.S,<br>ppip5k1.S,<br>pfkfb4.L,<br>ppp2cb.S,<br>ctdsp2.L,<br>ctdsp2.S                                                               | 0.09 | 0.01 | 160.77 | 474.97  | 1  |
| D2 | GO:0070728 | leucine<br>binding                                                | 6.10E-04 | 2  | sesn1.L,<br>sesn1.S                                                                                                                                     | 0.02 | 0.18 | 52.32  | 168.19  | -1 |

|    |            |                                                   |          |    |                                                                                                                                                                      |      |      |        |         |    |
|----|------------|---------------------------------------------------|----------|----|----------------------------------------------------------------------------------------------------------------------------------------------------------------------|------|------|--------|---------|----|
| L1 | GO:0051787 | misfolded protein binding                         | 4.75E-08 | 7  | sdf2l1.L, dnajb9.S, dnajc3.L, hspa5.S, sdf2l1.S, sdf2.S, edem1.L                                                                                                     | 0.03 | 0.22 | 284.67 | 2084.69 | 0  |
| L1 | GO:0016757 | transferase activity transferring glycosyl groups | 2.31E-05 | 17 | parp3.L, sdf2l1.L, qtrt1.S, mgat1.S, ppat.L, alg6.L, sdf2l1.S, sdf2.S, umps.L, Xelaev1803963 9m.g, man2a1.S, b3gnt5.S, alg2.L, c1galt1c1.L, edem1.L, chsy1.L, pdcl.S | 0.06 | 0.04 | 544.40 | 2524.03 | 1  |
| L1 | GO:0044653 | dextrin alpha-glucosidase activity                | 8.66E-03 | 2  | man2a1.S, edem1.L                                                                                                                                                    | 0.01 | 0.15 | 32.64  | 67.32   | 2  |
| L1 | GO:0008933 | lytic transglycosylase activity                   | 8.66E-03 | 2  | man2a1.S, edem1.L                                                                                                                                                    | 0.01 | 0.15 | 32.64  | 67.32   | -1 |
| L2 | GO:0015197 | peptide transporter activity                      | 6.40E-08 | 11 | kpna4.S, kpna2.L, ipo4.L, kpnb1.S, kpna4.L, slc15a2.L, kpnb1.L, kpna6.L, xpo6.S, xpo5.S, tfrc.L                                                                      | 0.07 | 0.06 | 281.95 | 2028.36 | 0  |
| L2 | GO:0043021 | ribonucleoprotein complex binding                 | 5.50E-07 | 11 | srpra.L, ddx3x.L, srp68.S, dhx29.L, ddx3x.S, gcn1.S, gcn1.L, prmt7.L, pelo.L, mtif2.L, nvl.L                                                                         | 0.07 | 0.05 | 208.05 | 1302.34 | 1  |

|    |            |                                  |          |    |                                                                                                                                                                                                                             |      |      |        |         |   |
|----|------------|----------------------------------|----------|----|-----------------------------------------------------------------------------------------------------------------------------------------------------------------------------------------------------------------------------|------|------|--------|---------|---|
| L2 | GO:0030331 | estrogen receptor binding        | 4.54E-04 | 5  | ctnnb1.S, src.S, dnmt1.S, src.L, pik3r2-like.S                                                                                                                                                                              | 0.03 | 0.05 | 106.24 | 355.12  | 2 |
| L3 | GO:0140097 | catalytic activity acting on DNA | 8.70E-09 | 16 | prmt5.L, mcm6.2.S, zmcm3.L, fen1.S, mcm5.S, mcm2.S, aptx.L, mcm2.L, mcm4.L, mcm7.L, mcm4.S, mcm6.2.L, mcm5.L, nme4.S, dnmt1.L, mcm7.S                                                                                       | 0.08 | 0.05 | 457.11 | 3684.51 | 0 |
| L3 | GO:0003688 | DNA replication origin binding   | 1.62E-09 | 6  | mcm5.S, mcm2.S, mcm2.L, mcm5.L, hspd1.S, orc6.L                                                                                                                                                                             | 0.03 | 0.40 | 162.87 | 1431.58 | 1 |
| L3 | GO:0008168 | methyltransferase activity       | 1.90E-07 | 18 | wdr4.S, ntmt1.S, Xelaev1803779 0m.g, Xelaev1803606 1m.g, prmt5.L, trmt61a.L, hemk1.L, wdr77.S, Xelaev1802423 4m.g, prmt3.S, Xelaev1802255 6m.g, mettl1.L, mettl21b.L, Xelaev1802256 0m.g, rbbp4.L, rbbp4.S, comt.L, dnmt1.L | 0.09 | 0.04 | 374.31 | 2516.02 | 2 |



|    |            |                                        |          |    |                                                                                                         |      |      |        |        |    |
|----|------------|----------------------------------------|----------|----|---------------------------------------------------------------------------------------------------------|------|------|--------|--------|----|
| D3 | GO:0005539 | glycosaminoglycan binding              | 1.44E-04 | 10 | shh.L, acan.L, col5a1-like.L, dpysl3.S, loc101731931.S, unnamed.L, dpysl3.L, pcsk1.L, crispld2.L, gns.S | 0.06 | 0.03 | 174.92 | 671.83 | 0  |
| D3 | GO:0047485 | protein N-terminus binding             | 2.26E-03 | 7  | loc549366.S, tbl1x.L, mecpl2.S, tbl1x.S, tsc1.L, sgf29.S, mecpl2.L                                      | 0.04 | 0.03 | 128.08 | 338.88 | 1  |
| D3 | GO:1901981 | phosphatidylinositol phosphate binding | 9.47E-03 | 7  | wipi1.L, cfl2.L, hcn2.S, unnamed.L, hip1.L, hip1.S, rph3al.S                                            | 0.04 | 0.02 | 105.89 | 214.30 | 2  |
| D3 | GO:0032051 | clathrin light chain binding           | 3.01E-03 | 2  | hip1.L, hip1.S                                                                                          | 0.01 | 0.17 | 28.63  | 72.17  | -1 |

1

2

3

4

5

6

7

8

9

10

11

**Supplementary Table S4 - GO Enrichment results, Biological process**

| Module | GO ID      | GO Description                                          | pvalue   | Count | Genes                                                                                                            | Gene Module Ratio | GO term Ratio | $\Sigma$ BIC | x-value | GO term cluster |
|--------|------------|---------------------------------------------------------|----------|-------|------------------------------------------------------------------------------------------------------------------|-------------------|---------------|--------------|---------|-----------------|
| E1     | GO:0048145 | regulation of fibroblast proliferation                  | 1.29E-11 | 10    | fos.S, nfkbia.L, fos.L, loc100490871-like.L, loc100490871-like.S, myc.S, myc.L, itgb3.L, jun.L, jun.S            | 0.21              | 0.05          | 349.29       | 3803.15 | 0               |
| E1     | GO:0001890 | placenta development                                    | 4.39E-08 | 9     | ptgs2.L, adm.S, junb.S, junb.L, socs3.L, hes1.L, loc101731931.L, socs3.S, Xelaev18021648m.g                      | 0.19              | 0.02          | 245.42       | 1805.67 | 1               |
| E1     | GO:0048661 | positive regulation of smooth muscle cell proliferation | 1.57E-07 | 7     | ptgs2.L, egr1.L, myc.S, myc.L, itgb3.L, jun.L, jun.S                                                             | 0.15              | 0.03          | 235.83       | 1604.50 | 2               |
| E2     | GO:0006596 | polyamine biosynthetic process                          | 8.14E-07 | 4     | odc1.S, azin1.S, smox.S, azin2.S                                                                                 | 0.05              | 0.17          | 107.32       | 653.55  | 0               |
| E2     | GO:0002685 | regulation of leukocyte migration                       | 4.49E-06 | 8     | Xelaev18036272m.g, Xelaev18010901m.g, ptafr.L, ctgf.S, Xelaev18008178m.g, serpine1.L, thbs1.L, Xelaev18009501m.g | 0.11              | 0.03          | 264.86       | 1416.42 | 1               |

|    |            |                                                     |          |   |                                                                                     |      |      |        |         |   |
|----|------------|-----------------------------------------------------|----------|---|-------------------------------------------------------------------------------------|------|------|--------|---------|---|
| E2 | GO:0030193 | regulation of blood coagulation                     | 4.07E-06 | 7 | Xelaev18010901m.g, abat.S, Xelaev18008178m.g, fam46b.L, abat.L, serpine1.L, thbs1.L | 0.09 | 0.03 | 168.81 | 910.00  | 2 |
| E2 | GO:0042119 | neutrophil activation                               | 6.96E-06 | 5 | Xelaev18036272m.g, Xelaev18010901m.g, ptafr.L, Xelaev18008178m.g, Xelaev18009501m.g | 0.07 | 0.06 | 133.28 | 687.39  | 3 |
| E2 | GO:0071674 | mononuclear cell migration                          | 1.57E-05 | 5 | Xelaev18036272m.g, ctgf.S, serpine1.L, thbs1.L, Xelaev18009501m.g                   | 0.07 | 0.05 | 212.46 | 1020.74 | 4 |
| E2 | GO:0031669 | cellular response to nutrient levels                | 4.61E-04 | 7 | cdkn1a.L, atf3.L, srf.S, cyp27b1.L, angptl4.S, angptl4.L, nuak2.S                   | 0.09 | 0.02 | 233.82 | 780.13  | 5 |
| E2 | GO:0045766 | positive regulation of angiogenesis                 | 3.46E-04 | 6 | ecm1.L, angptl4.S, angptl4.L, serpine1.L, thbs1.L, Xelaev18009501m.g                | 0.08 | 0.02 | 265.20 | 917.99  | 6 |
| E2 | GO:2001236 | regulation of extrinsic apoptotic signaling pathway | 6.28E-03 | 5 | Xelaev18034426m.g, atf3.L, g0s2.L, serpine1.L, thbs1.L                              | 0.07 | 0.01 | 211.54 | 465.79  | 7 |

|    |            |                                                         |          |    |                                                                                                                       |      |      |        |         |    |
|----|------------|---------------------------------------------------------|----------|----|-----------------------------------------------------------------------------------------------------------------------|------|------|--------|---------|----|
| E2 | GO:0034764 | positive regulation of transmembrane transport          | 4.97E-03 | 5  | odc1.S, azin1.S, Xelaev18043136m.g, ptafr.L, azin2.S                                                                  | 0.07 | 0.01 | 131.96 | 303.99  | 8  |
| E2 | GO:0070960 | positive regulation of neutrophil mediated cytotoxicity | 5.44E-04 | 2  | Xelaev18010901m.g, Xelaev18008178m.g                                                                                  | 0.03 | 0.18 | 36.40  | 118.81  | 9  |
| E2 | GO:0030168 | platelet activation                                     | 1.33E-04 | 7  | rap2b.L, Xelaev18010901m.g, srf.S, abat.S, Xelaev18008178m.g, actn1.L, abat.L                                         | 0.09 | 0.02 | 163.95 | 635.46  | -1 |
| I1 | GO:0061028 | establishment of endothelial barrier                    | 6.69E-07 | 10 | s1pr5.L, tnfrsf21.L, f2r12.S, cldn5.L, jup.L, f2r.S, msn.S, myadm.S, msn.L, myadm.L                                   | 0.05 | 0.07 | 468.93 | 2895.51 | 0  |
| I1 | GO:0007229 | integrin-mediated signaling pathway                     | 4.61E-06 | 11 | itgb6.L, itgb1.L, itga2.L, timp-1.L, timp-1.S, Xelaev18002841m.g, myh9.S, Xelaev18041763m.g, ccm2.S, myh9.L, cttna1.S | 0.05 | 0.05 | 683.37 | 3646.63 | 1  |

|    |            |                                                          |          |    |                                                                                                               |      |      |        |         |    |
|----|------------|----------------------------------------------------------|----------|----|---------------------------------------------------------------------------------------------------------------|------|------|--------|---------|----|
| I1 | GO:0050920 | regulation of chemotaxis                                 | 1.53E-04 | 13 | wnt5a.S, s1pr5.L, itga2.L, f2r12.S, camk1g.L, kdr.L, mst1.L, f2r.S, sema3b.S, f3.L, thbs1.S, prtn3.S, smad3.L | 0.06 | 0.03 | 606.87 | 2315.79 | 2  |
| I1 | GO:0030834 | regulation of actin filament depolymerization            | 8.57E-05 | 7  | f2r12.S, myh9.S, f2r.S, msn.S, myh9.L, lima1.L, msn.L                                                         | 0.03 | 0.06 | 330.18 | 1342.86 | 3  |
| I1 | GO:0006911 | phagocytosis engulfment                                  | 8.99E-05 | 6  | itga2.L, f2r12.S, myh9.S, f2r.S, myh9.L, thbs1.S                                                              | 0.03 | 0.08 | 305.20 | 1234.88 | 4  |
| I1 | GO:1902904 | negative regulation of supramolecular fiber organization | 1.84E-03 | 9  | s1pr5.L, myh9.S, msn.S, myh9.L, myadm.S, lima1.L, msn.L, mid1.L, myadm.L                                      | 0.04 | 0.03 | 455.53 | 1246.21 | 5  |
| I2 | GO:0042273 | ribosomal large subunit biogenesis                       | 3.23E-06 | 5  | znf622.S, noc2l.L, rrp15.L, ppan.S, ppan.L                                                                    | 0.11 | 0.04 | 87.24  | 479.02  | 0  |
| I2 | GO:0022618 | ribonucleoprotein complex assembly                       | 1.22E-03 | 5  | nufip1.L, ppan.S, eif3j.S, srsf10.S, ppan.L                                                                   | 0.11 | 0.01 | 99.75  | 290.78  | 1  |
| I2 | GO:0006364 | rRNA processing                                          | 2.44E-04 | 6  | utp15.L, wdr75.S, nop14.L, ddx54.L, naf1.L, rrp15.L                                                           | 0.13 | 0.01 | 115.78 | 418.23  | -1 |

|    |            |                  |          |    |                                                                                                                                                                                                                                                                                                                                                                                  |      |      |         |         |   |
|----|------------|------------------|----------|----|----------------------------------------------------------------------------------------------------------------------------------------------------------------------------------------------------------------------------------------------------------------------------------------------------------------------------------------------------------------------------------|------|------|---------|---------|---|
| I3 | GO:0006364 | rRNA processing  | 1.56E-29 | 43 | fbl.L, utp4.L, nop58.L, nop58.S, mrto4.S, diexf.L, ddx27.L, tbl3.L, rsl1d1.L, wdr12.S, nop2.L, npm3.S, nop56.L, tsr1.L, aen.L, rsl1d1.S, dhx37.L, rrp1b.L, nhp2.L, ftsj3.L, rrs1.L, diexf.S, dkc1.L, gnl3.L, rrp1b.S, ngdn.L, riok2.S, rpf2.S, utp18.L, dcaf13.S, rexo4.S, mrto4.L, abt1.L, rrs1.S, bysl.S, fbl.S, bop1.L, thumpd1.S, dcaf13.L, pwp2.S, nolc1.L, bms1.L, mak16.S | 0.18 | 0.10 | 1648.14 | #####   | 0 |
| I3 | GO:0009451 | RNA modification | 2.62E-13 | 18 | fbl.L, nop58.L, nop58.S, pus1.S, nop2.L, nop56.L, nsun2.S, nhp2.L, ftsj3.L, syncrip.S, dkc1.L, syncrip.L, trmt6.S, fbl.S, thumpd1.S, thumpd3.L, Xelaev18019094m.g, ssb.S                                                                                                                                                                                                         | 0.08 | 0.10 | 692.41  | 8711.20 | 1 |

|    |            |                                               |          |    |                                                                                                                    |      |      |        |         |   |
|----|------------|-----------------------------------------------|----------|----|--------------------------------------------------------------------------------------------------------------------|------|------|--------|---------|---|
| I3 | GO:0000469 | cleavage involved in rRNA processing          | 1.59E-09 | 9  | npm3.S, tsr1.L, nhp2.L, rrs1.L, gnl3.L, abt1.L, rrs1.S, bop1.L, bms1.L                                             | 0.04 | 0.18 | 335.32 | 2950.27 | 2 |
| I3 | GO:0043044 | ATP-dependent chromatin remodeling            | 3.89E-07 | 10 | npm3.S, ruvbl1.S, ruvbl1.L, hdac1.L, Xelaev18047430m.g, Xelaev18045052m.g, smarca5.L, anp32c.S, hdac1.S, smarca5.S | 0.04 | 0.08 | 350.97 | 2249.87 | 3 |
| I3 | GO:0022618 | ribonucleoprotein complex assembly            | 8.78E-04 | 12 | mrto4.S, npm3.S, tsr1.L, ruvbl1.S, ruvbl1.L, prmt5.S, brix1.L, rpf2.S, mrto4.L, abt1.L, pwp2.S, bms1.L             | 0.05 | 0.03 | 486.81 | 1488.02 | 4 |
| D1 | GO:0048754 | branching morphogenesis of an epithelial tube | 5.96E-05 | 10 | npnt.L, fhdc1.S, egf.L, nfatc3.S, dlg5.L, fgfr2.S, nfatc3.L, pkd2.L, tmem67.S, sall2.S                             | 0.10 | 0.02 | 244.20 | 1031.67 | 0 |
| D1 | GO:0031929 | TOR signaling                                 | 2.83E-04 | 6  | loc100493830-like.L, tsc2.S, mapkap1.S, sesn3.L, gatsl1.L, larp1b.L                                                | 0.06 | 0.03 | 121.71 | 431.87  | 1 |

|    |            |                                                            |          |   |                                                                           |      |      |        |        |    |
|----|------------|------------------------------------------------------------|----------|---|---------------------------------------------------------------------------|------|------|--------|--------|----|
| D1 | GO:2000371 | regulation of DNA topoisomerase (ATP-hydrolyzing) activity | 1.03E-03 | 2 | uhrf2.L, uhrf2.S                                                          | 0.02 | 0.18 | 49.97  | 149.27 | 2  |
| D1 | GO:1902275 | regulation of chromatin organization                       | 7.28E-03 | 6 | lpin1.L, hdac5.L, lpin1.S, uhrf2.L, uhrf2.S, pkd2.L                       | 0.06 | 0.02 | 199.99 | 427.54 | -1 |
| D2 | GO:1902308 | regulation of peptidyl-serine dephosphorylation            | 5.08E-04 | 2 | ppp1r15a.L, ppp1r15a.S                                                    | 0.03 | 0.20 | 42.57  | 140.21 | 0  |
| D2 | GO:0051384 | response to glucocorticoid                                 | 5.19E-04 | 6 | klf9.L, pfkfb1.S, cdo1.L, npas4.S, sgk3.L, sgk2.L                         | 0.08 | 0.02 | 159.00 | 522.27 | 1  |
| D2 | GO:0043402 | glucocorticoid mediated signaling pathway                  | 6.20E-04 | 2 | sgk3.L, sgk2.L                                                            | 0.03 | 0.18 | 57.49  | 184.40 | 2  |
| D2 | GO:1901991 | negative regulation of mitotic cell cycle phase transition | 9.71E-03 | 5 | ccng2.L, loc100489885.S, ctdsp2.L, MGC75753.L, ctdsp2.S                   | 0.06 | 0.01 | 120.81 | 243.17 | 3  |
| D2 | GO:0010508 | positive regulation of autophagy                           | 5.04E-03 | 6 | stk32a.L, tp53inp1.S, loc100494506-like.S, map1lc3a.S, ca5b.L, map1lc3b.S | 0.08 | 0.01 | 124.89 | 286.95 | 4  |



|    |            |                               |          |    |                                                                                                                                                                                                                                                                                                   |      |      |        |         |   |
|----|------------|-------------------------------|----------|----|---------------------------------------------------------------------------------------------------------------------------------------------------------------------------------------------------------------------------------------------------------------------------------------------------|------|------|--------|---------|---|
| L1 | GO:0006364 | rRNA processing               | 2.84E-11 | 25 | Xelaev18003918m.g,<br>heatr1.S, nhp2.S,<br>wdr12.L, skiv2l2.S,<br>utp15.S, npm3.L,<br>rrp9.S, ddx49.S,<br>utp6.L, exosc10.L,<br>loc100491278-like.L,<br>rrp9.L, wdr3.S,<br>loc100490380-like.L,<br>gar1.S, bop1.S,<br>xrn2.S, shq1.L,<br>ddx56.L, utp4.S,<br>dimt1.L, fcf1.S,<br>noc4l.L, riok2.L | 0.10 | 0.06 | 749.32 | 7902.79 | 0 |
| L1 | GO:0009116 | nucleoside metabolic process  | 1.89E-04 | 10 | qtrt1.S, ppat.L,<br>nme5.L, gmps.L,<br>umps.L, ptger2.S,<br>Xelaev18012070m.g,<br>entpd7.L, nme9.L,<br>pdcl.S                                                                                                                                                                                     | 0.04 | 0.04 | 253.72 | 944.78  | 1 |
| L1 | GO:0048546 | digestive tract morphogenesis | 2.68E-03 | 8  | stra6.L, ctnnb1.L,<br>sfrp2.S, hsp90b1.L,<br>wnt5a.L, stip1.L,<br>sfrpx.S, jup.S                                                                                                                                                                                                                  | 0.03 | 0.04 | 337.01 | 866.67  | 2 |

|    |            |                                             |          |    |                                                                                                |      |      |        |         |   |
|----|------------|---------------------------------------------|----------|----|------------------------------------------------------------------------------------------------|------|------|--------|---------|---|
| L2 | GO:0006607 | NLS-bearing protein import into nucleus     | 4.78E-10 | 8  | kpna4.S, kpna2.L, ipo4.L, kpnb1.S, kpna4.L, kpnb1.L, nup35.L, kpna6.L                          | 0.05 | 0.18 | 234.08 | 2181.68 | 0 |
| L2 | GO:0006364 | rRNA processing                             | 7.27E-04 | 10 | rarg-like.2.L, nol11.S, utp20.L, wdr46.L, wdr36.L, rcl1.S, mdn1.L, nol8.L, exosc4.S, suv39h1.L | 0.07 | 0.02 | 248.59 | 780.18  | 1 |
| L2 | GO:0017145 | stem cell division                          | 7.56E-05 | 7  | wnt7b.L, fzd2.S, smad1.L, fzd2.L, tia1.L, pelo.L, dock6-like.L                                 | 0.05 | 0.04 | 188.62 | 777.36  | 2 |
| L2 | GO:0072089 | stem cell proliferation                     | 4.29E-03 | 8  | ctnna1.L, wnt7b.L, nes.L, ctnnb1.S, fzd3.L, dync1h1.S, dock6-like.L, smarcd1.L                 | 0.05 | 0.02 | 213.63 | 505.76  | 3 |
| L2 | GO:0006610 | ribosomal protein import into nucleus       | 1.17E-04 | 3  | ipo4.L, kpnb1.S, kpnb1.L                                                                       | 0.02 | 0.20 | 110.43 | 434.22  | 4 |
| L2 | GO:0007172 | signal complex assembly                     | 1.43E-04 | 3  | pxn.S, src.S, src.L                                                                            | 0.02 | 0.19 | 81.66  | 313.92  | 5 |
| L2 | GO:0043550 | regulation of lipid kinase activity         | 1.51E-04 | 6  | rhog-like.1.S, src.S, src.L, rbl1.L, rbl1.S, pik3r2-like.S                                     | 0.04 | 0.05 | 124.99 | 477.47  | 6 |
| L2 | GO:0034446 | substrate adhesion-dependent cell spreading | 5.95E-03 | 6  | rhog-like.1.S, pxn.S, src.S, src.L, fzd2.S, fzd2.L                                             | 0.04 | 0.02 | 181.62 | 404.18  | 7 |

|    |            |                                               |          |    |                                                                                                                                         |      |      |        |         |    |
|----|------------|-----------------------------------------------|----------|----|-----------------------------------------------------------------------------------------------------------------------------------------|------|------|--------|---------|----|
| L2 | GO:0071680 | response to indole-3-methanol                 | 2.67E-03 | 2  | ctnna1.L, cttnb1.S                                                                                                                      | 0.01 | 0.17 | 57.37  | 147.60  | 8  |
| L2 | GO:0090305 | nucleic acid phosphodiester bond hydrolysis   | 5.67E-04 | 9  | kpnb1.S, utp20.L, ern1.L, rcl1.S, kpnb1.L, hspa14.L, cpsf2.L, exosc4.S, pelo.L                                                          | 0.06 | 0.03 | 185.13 | 601.08  | -1 |
| L2 | GO:0002066 | columnar/cuboidal epithelial cell development | 3.62E-03 | 7  | rhog-like.1.S, kpnb1.S, smad1.L, kpnb1.L, cdk4.S, dync1h1.S, sec24b.S                                                                   | 0.05 | 0.02 | 141.71 | 345.98  | -1 |
| L3 | GO:0006270 | DNA replication initiation                    | 1.09E-16 | 14 | mcm6.2.S, zmcm3.L, mcm5.S, mcm2.S, mcm2.L, mcm4.L, mcm7.L, mcm4.S, mcm6.2.L, mcm5.L, orc1.L, cdk2.S, mcm7.S, orc6.L                     | 0.07 | 0.24 | 416.24 | 6643.63 | 0  |
| L3 | GO:0006611 | protein export from nucleus                   | 8.69E-06 | 13 | chchd4.L, Xelaev18010463m.g, abce1.S, cpsf2.S, srsf2.L, eif6.S, xpo1.L, pcid2.S, Xelaev18019056m.g, chchd4.S, nup93.L, cse1l.L, srsf7.S | 0.06 | 0.04 | 242.21 | 1225.75 | 1  |

|    |            |                                             |          |    |                                                                                                                                                                         |      |      |        |         |   |
|----|------------|---------------------------------------------|----------|----|-------------------------------------------------------------------------------------------------------------------------------------------------------------------------|------|------|--------|---------|---|
| L3 | GO:0000077 | DNA damage checkpoint                       | 2.73E-05 | 13 | Xelaev18037790m.g,<br>Xelaev18036061m.g,<br>stt3a.L, stt3a.S,<br>polr2h.L, polr2f.S,<br>mcm7.L,<br>Xelaev18015757m.g,<br>cdk2.S, e2f1.L,<br>mcm7.S, e2f1.S,<br>rpa2.S   | 0.06 | 0.04 | 250.17 | 1141.73 | 2 |
| D3 | GO:0032369 | negative regulation of lipid transport      | 3.88E-06 | 6  | hbp1.L, shh.L,<br>loc100498409-like.L,<br>loc100498409-like.S,<br>irs4.L, hbp1.S                                                                                        | 0.04 | 0.10 | 123.26 | 666.94  | 0 |
| D3 | GO:0042594 | response to starvation                      | 1.75E-04 | 11 | Xelaev18002495m.g,<br>pdk4.S, pdk4.L,<br>slc38a3.L, slc18a2-like.2.S,<br>Xelaev18038264m.g,<br>Xelaev18026445m.g,<br>Xelaev18041485m.g,<br>max.L, adcyap1.L,<br>atg4b.L | 0.07 | 0.03 | 208.67 | 783.97  | 1 |
| D3 | GO:0042130 | negative regulation of T cell proliferation | 3.55E-04 | 5  | casp3.L, shh.L,<br>pde5a.L, unnamed.L,<br>Xelaev18045282m.g                                                                                                             | 0.03 | 0.06 | 70.49  | 243.12  | 2 |

|    |            |                                        |          |   |                                                                                                         |      |      |        |        |   |
|----|------------|----------------------------------------|----------|---|---------------------------------------------------------------------------------------------------------|------|------|--------|--------|---|
| D3 | GO:0050670 | regulation of lymphocyte proliferation | 2.15E-03 | 8 | casp3.L, shh.L, loc100498409-like.L, loc100498409-like.S, irs4.L, pde5a.L, unnamed.L, Xelaev18045282m.g | 0.05 | 0.02 | 122.04 | 325.62 | 3 |
|----|------------|----------------------------------------|----------|---|---------------------------------------------------------------------------------------------------------|------|------|--------|--------|---|

1

2

3

4

5

6

7

8

9

10

11

12

13

14

15

16

17

18

19

**Supplementary Table S5 - GO Enrichment results, Cellular Component**

| Module | GO ID      | GO Description        | pvalue   | Count | Genes                                                                                                                                                                          | Gene Module Ratio | GO term Ratio | $\Sigma$ BIC | x-value | GO term cluster |
|--------|------------|-----------------------|----------|-------|--------------------------------------------------------------------------------------------------------------------------------------------------------------------------------|-------------------|---------------|--------------|---------|-----------------|
| I1     | GO:0031528 | microvillus membrane  | 4.44E-10 | 8     | itgb6.L, slc9a3r1.L, slc9a3r1.S, jup.L, msn.S, Xelaev18020683m.g, msn.L, Xelaev18018158m.g                                                                                     | 0.04              | 0.24          | 378.42       | 3539.36 | 0               |
| I1     | GO:0030863 | cortical cytoskeleton | 2.47E-09 | 16    | cdh2.L, Xelaev18002841m.g, myh9.S, cldn5.L, vcl.S, Xelaev18041763m.g, msn.S, pdlim7.L, sept2.S, myh9.L, myadm.S, actn1.S, Xelaev18020683m.g, msn.L, Xelaev18018158m.g, myadm.L | 0.07              | 0.06          | 697.49       | 6003.55 | 1               |
| I1     | GO:0001726 | ruffle                | 3.88E-05 | 14    | itgb6.L, itgb1.L, rab34.L, myh9.S, msn.S, plekho1.S, pdlim7.L, myh9.L, myadm.S, snx5.L, actn1.S, msn.L, cyth1-like.S, myadm.L                                                  | 0.06              | 0.03          | 669.58       | 2953.97 | 2               |
| I1     | GO:0005915 | zonula adherens       | 5.70E-06 | 5     | Xelaev18037758m.g, vcl.S, jup.L, actn1.S, cttna1.S                                                                                                                             | 0.02              | 0.17          | 220.16       | 1154.49 | 3               |
| I1     | GO:0032154 | cleavage furrow       | 1.92E-04 | 7     | itgb1.L, myh9.S, msn.S, sept2.S, myh9.L, lima1.L, msn.L                                                                                                                        | 0.03              | 0.05          | 352.87       | 1311.33 | 4               |
| I1     | GO:0032432 | actin filament bundle | 1.36E-05 | 10    | Xelaev18002841m.g, myh9.S, vcl.S, Xelaev18041763m.g, pdlim7.L, cnn1.L, myh9.L, cnn1.S, lima1.L, actn1.S                                                                        | 0.05              | 0.05          | 568.83       | 2769.07 | 5               |
| I1     | GO:0005884 | actin filament        | 1.43E-04 | 10    | Xelaev18002841m.g, vcl.S, Xelaev18041763m.g, pawr.S, dnajb9.L, pdlim7.L, actn1.S, Xelaev18020683m.g, Xelaev18018158m.g, Xelaev18026141m.g                                      | 0.05              | 0.04          | 337.98       | 1299.05 | 6               |

|    |            |                                         |          |    |                                                                                                                                                                                                                                         |      |      |         |          |    |
|----|------------|-----------------------------------------|----------|----|-----------------------------------------------------------------------------------------------------------------------------------------------------------------------------------------------------------------------------------------|------|------|---------|----------|----|
| I1 | GO:0031091 | platelet alpha granule                  | 7.19E-04 | 6  | itgb6.L, timp-1.L, timp-1.S, loc100493411.S, thbs1.S, actn1.S                                                                                                                                                                           | 0.03 | 0.05 | 441.45  | 1387.57  | 7  |
| I1 | GO:0098862 | cluster of actin-based cell projections | 7.88E-07 | 15 | slc9a3r1.L, homer2.S, slc9a3r1.S, Xelaev18002841m.g, myh9.S, vcl.S, Xelaev18041763m.g, msn.S, myh9.L, lima1.L, soat1.S, actn1.S, Xelaev18020683m.g, msn.L, Xelaev18018158m.g                                                            | 0.07 | 0.04 | 632.36  | 3859.74  | -1 |
| I1 | GO:0005604 | basement membrane                       | 4.47E-03 | 7  | itgb1.L, timp-1.L, runx1.L, timp-1.S, runx1.S, egfl6.S, thbs1.S                                                                                                                                                                         | 0.03 | 0.03 | 487.56  | 1145.63  | -1 |
| I2 | GO:0030684 | preribosome                             | 2.55E-07 | 6  | znf622.S, nop14.L, noc2l.L, rrp15.L, ppan.S, ppan.L                                                                                                                                                                                     | 0.12 | 0.05 | 111.26  | 733.48   | 0  |
| I2 | GO:0001725 | stress fiber                            | 4.38E-05 | 5  | pdlim7.S, sept9.L, pdlim4.S, tpm4.S, tpm4.L                                                                                                                                                                                             | 0.10 | 0.03 | 115.72  | 504.36   | 1  |
| I2 | GO:0030689 | Noc complex                             | 1.98E-04 | 2  | nop14.L, noc2l.L                                                                                                                                                                                                                        | 0.04 | 0.20 | 46.56   | 172.38   | -1 |
| I3 | GO:0030684 | preribosome                             | 7.47E-29 | 27 | fbl.L, nop58.L, nop58.S, mrto4.S, dixf.L, tbl3.L, rsl1d1.L, wdr12.S, nop56.L, tsr1.L, rsl1d1.S, rrp1b.L, ftsj3.L, rrs1.L, dixf.S, rrp1b.S, ngdn.L, utp18.L, dcaf13.S, mrto4.L, rrs1.S, fbl.S, bop1.L, dcaf13.L, pwp2.S, bms1.L, mak16.S | 0.12 | 0.22 | 1086.21 | 30551.13 | 0  |
| I3 | GO:0044452 | nucleolar part                          | 2.66E-14 | 16 | fbl.L, utp4.L, nop58.L, nop58.S, tbl3.L, wdr12.S, twistnb.L, npm3.S, nop56.L, nhp2.L, dk1.L, utp18.L, fbl.S, bop1.L, cd3eap-like.L, pwp2.S                                                                                              | 0.07 | 0.14 | 669.64  | 9089.94  | 1  |

|    |            |                                         |          |    |                                                                                                       |      |      |        |         |    |
|----|------------|-----------------------------------------|----------|----|-------------------------------------------------------------------------------------------------------|------|------|--------|---------|----|
| I3 | GO:0034708 | methyltransferase complex               | 2.28E-04 | 9  | ruvbl1.S, ruvbl1.L, wdr82.L, hdac1.L, prmt5.S, Xelaev18047430m.g, Xelaev18045052m.g, trmt6.S, hdac1.S | 0.04 | 0.04 | 298.92 | 1088.71 | 2  |
| I3 | GO:0016363 | nuclear matrix                          | 9.59E-04 | 9  | xpot.S, npm3.S, ruvbl1.S, ruvbl1.L, lmnbl1.S, ppid.L, lmnbl1.L, anp32c.S, prpf40a.S                   | 0.04 | 0.04 | 306.16 | 924.04  | 3  |
| I3 | GO:1905368 | peptidase complex                       | 7.44E-03 | 6  | wfs1.L, psme3.S, psme3.L, txnl1.S, txnl1.L, sec11a.L                                                  | 0.03 | 0.03 | 173.06 | 368.31  | 4  |
| I3 | GO:1904949 | ATPase complex                          | 1.21E-04 | 9  | abcf2.L, ruvbl1.S, ruvbl1.L, abcb6.L, hdac1.L, smarca5.L, hdac1.S, ino80b.S, smarca5.S                | 0.04 | 0.05 | 306.56 | 1201.25 | -1 |
| I3 | GO:0070603 | SWI/SNF superfamily-type complex        | 7.05E-04 | 7  | ruvbl1.S, ruvbl1.L, hdac1.L, smarca5.L, hdac1.S, ino80b.S, smarca5.S                                  | 0.03 | 0.05 | 225.12 | 709.51  | -1 |
| D1 | GO:1903349 | omegasome membrane                      | 1.12E-03 | 2  | ulk2.L, ulk1.S                                                                                        | 0.02 | 0.18 | 66.74  | 196.91  | -1 |
| D1 | GO:1990462 | omegasome                               | 1.12E-03 | 2  | ulk2.L, ulk1.S                                                                                        | 0.02 | 0.18 | 66.74  | 196.91  | -1 |
| D1 | GO:0044853 | plasma membrane raft                    | 8.14E-03 | 5  | tsc2.S, lrp8.S, slc5a7.S, slc5a7.L, lipe.L                                                            | 0.05 | 0.02 | 105.73 | 220.93  | -1 |
| L1 | GO:0034663 | endoplasmic reticulum chaperone complex | 2.91E-12 | 9  | sdf2l1.L, pdia6.L, hyou1.L, hspa5.S, hsp90b1.L, sdf2l1.S, pdia6.S, sdf2.S, hyou1.S                    | 0.04 | 0.36 | 419.00 | 4833.44 | 0  |
| L1 | GO:0030684 | preribosome                             | 1.03E-07 | 11 | Xelaev18003918m.g, heatr1.S, wdr12.L, nip7.L, rrp9.S, utp6.L, rrp9.L, wdr3.S, bop1.S, fcf1.S, noc4l.L | 0.04 | 0.09 | 343.38 | 2399.20 | 1  |
| L2 | GO:0005643 | nuclear pore                            | 1.24E-06 | 8  | kpna4.S, kpna2.L, ipo4.L, kpnb1.S, kpna4.L, kpnb1.L, nup35.L, kpna6.L                                 | 0.05 | 0.06 | 234.08 | 1382.53 | 0  |



|    |            |                                       |          |    |                                                                                                                                                         |      |      |        |         |    |
|----|------------|---------------------------------------|----------|----|---------------------------------------------------------------------------------------------------------------------------------------------------------|------|------|--------|---------|----|
| L2 | GO:0005875 | microtubule associated complex        | 2.00E-03 | 9  | pxn.S, prpf19.L, emc8.S, kpnb1.S, kif5b.S, kpnb1.L, bub3.L, dync1h1.S, bub3.S                                                                           | 0.06 | 0.02 | 190.53 | 514.21  | 1  |
| L2 | GO:0036464 | cytoplasmic ribonucleoprotein granule | 6.53E-03 | 7  | rhog-like.1.S, mex3c.S, ddx3x.L, kpnb1.S, kpnb1.L, tia1.L, ddx3x.S                                                                                      | 0.05 | 0.02 | 170.44 | 372.45  | 2  |
| L2 | GO:0005840 | ribosome                              | 1.22E-03 | 9  | serp2.L, ddx3x.L, srp68.S, ddx3x.S, gcn1.S, hspa14.L, mrpl14.L, gcn1.L, metap1.L                                                                        | 0.06 | 0.02 | 194.65 | 567.44  | -1 |
| L3 | GO:0000781 | chromosome telomeric region           | 3.23E-13 | 18 | stt3a.L, stt3a.S, mcm6.2.S, zmcm3.L, fen1.S, mcm5.S, mcm2.S, mcm2.L, mcm4.L, mcm7.L, mcm4.S, nhp211.S, mcm6.2.L, mcm5.L, orc1.L, cdk2.S, mcm7.S, rpa2.S | 0.09 | 0.09 | 493.47 | 6163.59 | 0  |
| L3 | GO:0031970 | organelle envelope lumen              | 1.84E-06 | 10 | chchd4.L, ak2.L, ak2.S, ngfr.S, chchd4.S, pdia3.S, rexo2.L, nme4.S, ngfr.L, stoml2.L                                                                    | 0.05 | 0.06 | 216.05 | 1238.88 | 1  |
| L3 | GO:0034708 | methyltransferase complex             | 9.07E-05 | 9  | Xelaev18037790m.g, Xelaev18036061m.g, prmt5.L, trmt61a.L, wdr77.S, Xelaev18016354m.g, mettl1.L, rbbp4.L, rbbp4.S                                        | 0.04 | 0.04 | 215.42 | 870.84  | 2  |
| L3 | GO:0005788 | endoplasmic reticulum lumen           | 6.18E-06 | 13 | hsp90b1.S, ganab.L, ctsc.S, pdia4.L, txndc5.S, p4hb.L, gpx7.S, cln6.S, Xelaev18019056m.g, ganab.S, pdia3.S, ugg2.L, lepre1.L                            | 0.06 | 0.04 | 324.48 | 1690.20 | 3  |
| L3 | GO:0030684 | preribosome                           | 7.47E-04 | 6  | ebna1bp2.L, wdr36.S, nob1.S, eif6.S, nhp211.S, fcf1.L                                                                                                   | 0.03 | 0.05 | 128.23 | 400.90  | 4  |

|    |            |                             |          |    |                                                                                                                                          |      |      |        |         |    |
|----|------------|-----------------------------|----------|----|------------------------------------------------------------------------------------------------------------------------------------------|------|------|--------|---------|----|
| L3 | GO:0042470 | melanosome                  | 2.36E-03 | 7  | hsp90b1.S, ganab.L, pdia4.L, p4hb.L, ganab.S, pdia3.S, itgb5.L                                                                           | 0.03 | 0.03 | 183.74 | 482.84  | 5  |
| L3 | GO:0042555 | MCM complex                 | 1.84E-19 | 11 | mcm6.2.S, zmcm3.L, mcm5.S, mcm2.S, mcm2.L, mcm4.L, mcm7.L, mcm4.S, mcm6.2.L, mcm5.L, mcm7.S                                              | 0.05 | 0.65 | 363.57 | 6811.33 | -1 |
| L3 | GO:0005657 | replication fork            | 2.82E-03 | 5  | stt3a.L, stt3a.S, zmcm3.L, dnmt1.L, rpa2.S                                                                                               | 0.02 | 0.05 | 110.84 | 282.59  | -1 |
| D3 | GO:0043679 | axon terminus               | 1.10E-04 | 12 | slc18a2-like.2.S, hcn2.S, dpysl3.S, Xelaev18038264m.g, rapgef3.L, dbh.L, dpysl3.L, Xelaev18041485m.g, adcyap1.L, pnoc.S, ptpn.S, calca.L | 0.07 | 0.03 | 206.80 | 818.39  | 0  |
| D3 | GO:0000118 | histone deacetylase complex | 2.22E-03 | 5  | tbl1x.L, tbl1x.S, hdac9.L, sap30.L, sap30.S                                                                                              | 0.03 | 0.04 | 113.46 | 301.20  | -1 |

- 1
- 2
- 3
- 4
- 5
- 6
- 7
- 8
- 9
- 10
- 11

**Supplementary Table S6 - KEGG Pathway Enrichment results**

| Module | Path. ID | Path. Description                                    | FDR      | Count | Genes                                       |
|--------|----------|------------------------------------------------------|----------|-------|---------------------------------------------|
| E1     | hsa04668 | TNF signaling pathway                                | 4.75E-06 | 7     | JUNB, VEGFC, JUN, PTGS2, FOS, NFKBIA, SOCS3 |
| E1     | hsa04380 | Osteoclast differentiation                           | 2.81E-03 | 5     | JUNB, JUN, FOS, NFKBIA, SOCS3               |
| E1     | hsa04657 | IL-17 signaling pathway                              | 5.36E-03 | 4     | JUN, PTGS2, FOS, NFKBIA                     |
| E1     | hsa05166 | Human T-cell leukemia virus 1 infection              | 5.36E-03 | 6     | ETS2, EGR1, JUN, MYC, FOS, NFKBIA           |
| E1     | hsa05140 | Leishmaniasis                                        | 7.12E-03 | 4     | JUN, PTGS2, FOS, NFKBIA                     |
| E1     | hsa04010 | MAPK signaling pathway                               | 7.12E-03 | 6     | VEGFC, DUSP6, JUN, MYC, DUSP5, FOS          |
| E1     | hsa05167 | Kaposi sarcoma-associated herpesvirus infection      | 7.12E-03 | 5     | JUN, PTGS2, MYC, FOS, NFKBIA                |
| E1     | hsa04210 | Apoptosis                                            | 1.42E-02 | 4     | TNFRSF10B, JUN, FOS, NFKBIA                 |
| E1     | hsa04926 | Relaxin signaling pathway                            | 1.42E-02 | 4     | VEGFC, JUN, FOS, NFKBIA                     |
| E1     | hsa05224 | Breast cancer                                        | 1.42E-02 | 4     | JUN, HES1, MYC, FOS                         |
| E1     | hsa04662 | B cell receptor signaling pathway                    | 1.96E-02 | 3     | JUN, FOS, NFKBIA                            |
| E1     | hsa05031 | Amphetamine addiction                                | 1.96E-02 | 3     | JUN, ARC, FOS                               |
| E1     | hsa05161 | Hepatitis B                                          | 1.96E-02 | 4     | JUN, MYC, FOS, NFKBIA                       |
| E1     | hsa05210 | Colorectal cancer                                    | 3.36E-02 | 3     | JUN, MYC, FOS                               |
| E1     | hsa05222 | Small cell lung cancer                               | 3.36E-02 | 3     | PTGS2, MYC, NFKBIA                          |
| E1     | hsa04620 | Toll-like receptor signaling pathway                 | 3.40E-02 | 3     | JUN, FOS, NFKBIA                            |
| E1     | hsa04625 | C-type lectin receptor signaling pathway             | 3.45E-02 | 3     | JUN, PTGS2, NFKBIA                          |
| E1     | hsa04660 | T cell receptor signaling pathway                    | 3.50E-02 | 3     | JUN, FOS, NFKBIA                            |
| E1     | hsa05142 | Chagas disease (American trypanosomiasis)            | 3.64E-02 | 3     | JUN, FOS, NFKBIA                            |
| E1     | hsa05169 | Epstein-Barr virus infection                         | 3.64E-02 | 4     | JUN, HES1, MYC, NFKBIA                      |
| E1     | hsa04933 | AGE-RAGE signaling pathway in diabetic complications | 3.64E-02 | 3     | VEGFC, EGR1, JUN                            |
| E1     | hsa04658 | Th1 and Th2 cell differentiation                     | 3.64E-02 | 3     | JUN, FOS, NFKBIA                            |
| E2     | hsa04115 | p53 signaling pathway                                | 1.80E-02 | 4     | SERPINE1, GADD45G, CDKN1A, THBS1            |

|    |          |                                                          |          |    |                                                                                                       |
|----|----------|----------------------------------------------------------|----------|----|-------------------------------------------------------------------------------------------------------|
| E2 | hsa04668 | TNF signaling pathway                                    | 3.91E-02 | 4  | LIF, BIRC2, IRF1, MAP3K14                                                                             |
| E2 | hsa04066 | HIF-1 signaling pathway                                  | 3.91E-02 | 4  | SERPINE1, CDKN1A, HK2, LTBR                                                                           |
| I1 | hsa04060 | Cytokine-cytokine receptor interaction                   | 5.87E-03 | 13 | TNFRSF12A, IL11RA, LIF, CCL19, CCL13, CCL3L1, IL1R2, LEP, TNFRSF21, INHBA, TNFRSF11B, TNFRSF6B, IL21R |
| I1 | hsa05205 | Proteoglycans in cancer                                  | 7.52E-03 | 11 | FLNA, MSN, KDR, ITGA2, ERBB3, HBEGF, ITGB1, FZD6, RRAS2, THBS1, MRAS                                  |
| I1 | hsa05412 | Arrhythmogenic right ventricular cardiomyopathy (ARVC)   | 1.53E-02 | 6  | ITGA2, ITGB1, CDH2, JUP, ITGB6, CACNG5                                                                |
| I1 | hsa04530 | Tight junction                                           | 4.51E-02 | 8  | MSN, CLDN5, RUNX1, MYH9, ITGB1, ACTN1, SLC9A3R1, TUBA1A                                               |
| I3 | hsa03008 | Ribosome biogenesis in eukaryotes                        | 5.06E-11 | 12 | NOP56, GNL3, RIOK2, PWP2, RBM28, UTP4, BMS1, FBL, DKC1, UTP18, NOP58, TBL3                            |
| D1 | hsa04150 | mTOR signaling pathway                                   | 1.19E-03 | 7  | ULK1, ULK2, CASTOR2, LPIN1, DEPTOR, MAPKAP1, TSC2                                                     |
| D2 | hsa04216 | Ferroptosis                                              | 3.45E-02 | 3  | MAP1LC3B, MAP1LC3A, SLC40A1                                                                           |
| L1 | hsa03008 | Ribosome biogenesis in eukaryotes                        | 2.16E-04 | 8  | WDR3, RIOK2, GAR1, UTP15, UTP4, HEATR1, POP1, UTP6                                                    |
| L1 | hsa00510 | N-Glycan biosynthesis                                    | 1.99E-02 | 5  | DOLPP1, MAN2A1, ALG6, ALG2, MGAT1                                                                     |
| L1 | hsa04141 | Protein processing in endoplasmic reticulum              | 1.99E-02 | 9  | HYOU1, DNAJC3, HSP90B1, CKAP4, EDEM1, PDIA6, DERL1, SEC24C, SEL1L                                     |
| L2 | hsa04141 | Protein processing in endoplasmic reticulum              | 1.19E-02 | 8  | TRAM1, SEC24B, UBE2G1, RPN1, UGGT1, STT3B, HSPA8, ERN1                                                |
| L2 | hsa04360 | Axon guidance                                            | 1.19E-02 | 8  | SRC, PIK3R2, SEMA3C, SEMA3B, FZD3, MYL12A, NTN1, PLXNB3                                               |
| L2 | hsa04550 | Signaling pathways regulating pluripotency of stem cells | 1.19E-02 | 7  | SMAD1, PIK3R2, WNT7B, FZD3, CTNNB1, FZD2, RIF1                                                        |
| L2 | hsa05205 | Proteoglycans in cancer                                  | 2.29E-02 | 8  | SRC, PIK3R2, PXN, WNT7B, FLNC, FZD3, CTNNB1, FZD2                                                     |
| L2 | hsa00510 | N-Glycan biosynthesis                                    | 2.29E-02 | 4  | ALG8, ALG12, RPN1, STT3B                                                                              |
| L2 | hsa05100 | Bacterial invasion of epithelial cells                   | 2.29E-02 | 5  | SRC, PIK3R2, PXN, CTNNB1, RHOG                                                                        |
| L2 | hsa05217 | Basal cell carcinoma                                     | 4.72E-02 | 4  | WNT7B, FZD3, CTNNB1, FZD2                                                                             |
| L3 | hsa03030 | DNA replication                                          | 2.04E-05 | 7  | MCM7, MCM5, MCM2, FEN1, MCM3, MCM4, MCM6                                                              |
| L3 | hsa04141 | Protein processing in endoplasmic reticulum              | 3.01E-05 | 12 | MOGS, UGGT2, CALR, PDIA3, HSP90B1, CAPN1, SEC13, SSR3, PDIA4, DERL1, STT3A, HSPBP1                    |
| L3 | hsa04110 | Cell cycle                                               | 6.88E-04 | 9  | MCM7, ORC6, ORC1, MCM5, MCM2, MCM3, MCM4, E2F1, MCM6                                                  |

|    |          |                                   |          |   |                                       |
|----|----------|-----------------------------------|----------|---|---------------------------------------|
| L3 | hsa03008 | Ribosome biogenesis in eukaryotes | 2.50E-03 | 6 | WDR36, NOB1, SNU13, XPO1, REXO2, EIF6 |
| L3 | hsa00510 | N-Glycan biosynthesis             | 4.20E-03 | 5 | MOGS, ALG5, ALG6, ALG3, STT3A         |

1

2

3

4

5

6

7

8

9

10

11

12

13

14

15

16

17

18

19

20

21

22

**Supplementary Table S7 - Differential gene expression analysis of mTor Inhibition mRNA-seq**

|                      |                     | DMSO vs<br>Torin1 – 1 dpT |        | DMSO vs<br>Torin1 – 2 dpT |        | DMSO vs<br>Torin1 – 4 dpT |        |
|----------------------|---------------------|---------------------------|--------|---------------------------|--------|---------------------------|--------|
| Xenopus ID           | gene symbol         | logFC                     | PValue | logFC                     | PValue | logFC                     | PValue |
| mi Xelaev18038036m.g | Xelaev18038036m.g   | -8.92                     | 0.00   | -2.66                     | 0.00   | -2.38                     | 0.00   |
| mi Xelaev18036521m.g | Xelaev18036521m.g   | -8.49                     | 0.00   | -9.82                     | 0.00   | -5.58                     | 0.04   |
| mi Xelaev18011418m.g | loc101734578.L      | -7.65                     | 0.00   | 2.19                      | 0.01   | -0.37                     | 0.67   |
| mi Xelaev18007944m.g | Xelaev18007944m.g   | -7.52                     | 0.00   | -7.18                     | 0.00   | 0.00                      | 1.00   |
| mi Xelaev18032480m.g | loc100135371.L      | -7.32                     | 0.00   | -8.35                     | 0.00   | 0.07                      | 1.00   |
| mi Xelaev18003376m.g | igfals.1.L          | -7.32                     | 0.00   | 1.76                      | 0.05   | 1.31                      | 0.06   |
| mi Xelaev18022406m.g | Xelaev18022406m.g   | -7.04                     | 0.00   | 0.85                      | 0.48   | -0.91                     | 0.31   |
| mi Xelaev18013620m.g | krt75.L             | -6.97                     | 0.00   | -2.23                     | 0.00   | -2.21                     | 0.01   |
| mi Xelaev18027033m.g | adat2.L             | -6.97                     | 0.00   | 0.02                      | 1.00   | -0.50                     | 0.52   |
| mi Xelaev18010286m.g | Xetrov90002579m.S   | -6.88                     | 0.00   | -1.34                     | 0.15   | -0.22                     | 0.79   |
| mi Xelaev18027450m.g | Xelaev18027450m.g   | -6.84                     | 0.00   | -1.07                     | 0.06   | -1.39                     | 0.00   |
| mi Xelaev18044444m.g | slc4a3.L            | -6.80                     | 0.00   | 0.59                      | 0.78   | 0.79                      | 0.75   |
| mi Xelaev18046054m.g | loc100488256.S      | -6.71                     | 0.00   | 0.02                      | 1.00   | -1.28                     | 0.15   |
| mi Xelaev18035848m.g | loc100493881.L      | -6.26                     | 0.00   | -1.73                     | 0.22   | -2.85                     | 0.01   |
| mi Xelaev18032354m.g | Xelaev18032354m.g   | -6.26                     | 0.00   | 0.02                      | 1.00   | -0.24                     | 1.00   |
| mi Xelaev18000879m.g | loc100490626.S      | -6.13                     | 0.01   | -1.85                     | 0.05   | -0.36                     | 0.64   |
| mi Xelaev18026637m.g | mal.L               | -6.13                     | 0.01   | -1.94                     | 0.06   | -2.13                     | 0.01   |
| mi Xelaev18025719m.g | sstr3.S             | -6.13                     | 0.01   | 1.89                      | 0.40   | -1.22                     | 0.24   |
| mi Xelaev18047255m.g | Xetrov90024133m.S   | -5.98                     | 0.01   | -2.41                     | 0.00   | -1.54                     | 0.02   |
| mi Xelaev18035484m.g | Xelaev18035484m.g   | -5.81                     | 0.02   | -7.32                     | 0.00   | -6.30                     | 0.00   |
| mi Xelaev18009847m.g | loc100494822.S      | -5.62                     | 0.04   | -2.69                     | 0.00   | -2.35                     | 0.00   |
| mi Xelaev18014531m.g | cldn4.S             | -5.40                     | 0.08   | -0.07                     | 1.00   | -2.08                     | 0.00   |
| mi Xelaev18040728m.g | Xelaev18040728m.g   | -5.30                     | 0.08   | -2.15                     | 0.02   | -3.00                     | 0.00   |
| mi Xelaev18009818m.g | Xelaev18009818m.g   | -4.84                     | 0.14   | -6.70                     | 0.00   | -1.67                     | 0.22   |
| mi Xelaev18015036m.g | Xelaev18015036m.g   | -4.84                     | 0.14   | -2.15                     | 0.01   | -1.90                     | 0.02   |
| mi Xelaev18012142m.g | Xelaev18012142m.g   | -4.84                     | 0.14   | -0.75                     | 0.27   | -3.04                     | 0.00   |
| mi Xelaev18036100m.g | loc101731919.L      | -4.84                     | 0.14   | -0.49                     | 0.68   | -4.52                     | 0.00   |
| mi Xelaev18014725m.g | Xelaev18014725m.g   | -4.44                     | 0.26   | -3.22                     | 0.00   | -0.07                     | 1.00   |
| mi Xelaev18042333m.g | vgll1.S             | -4.44                     | 0.26   | -3.63                     | 0.00   | -2.75                     | 0.01   |
| mi Xelaev18012124m.g | Xelaev18012124m.g   | -4.44                     | 0.26   | -0.56                     | 0.33   | -2.25                     | 0.00   |
| mi Xelaev18036123m.g | loc100491292-like.L | -4.44                     | 0.26   | -0.15                     | 1.00   | -3.85                     | 0.00   |
| mi Xelaev18045876m.g | krt.S               | -4.44                     | 0.26   | -5.35                     | 0.08   | -2.85                     | 0.01   |
| mi Xelaev18034081m.g | Xelaev18034081m.g   | -4.25                     | 0.00   | -2.57                     | 0.00   | -2.92                     | 0.00   |
| mi Xelaev18034496m.g | Xelaev18034496m.g   | -4.04                     | 0.51   | -6.81                     | 0.00   | 4.68                      | 0.26   |
| mi Xelaev18032437m.g | loc100127564.L      | -4.04                     | 0.00   | -1.24                     | 0.02   | -2.20                     | 0.00   |
| mi Xelaev18004896m.g | loc100487404-like.L | -3.98                     | 0.00   | -0.10                     | 1.00   | -0.27                     | 0.75   |
| mi Xelaev18006283m.g | Xelaev18006283m.g   | -3.89                     | 0.51   | -7.46                     | 0.00   | 0.79                      | 0.75   |
| mi Xelaev18001560m.g | Xelaev18001560m.g   | -3.89                     | 0.51   | 1.89                      | 0.40   | -6.56                     | 0.00   |

|                      |                     |       |             |       |             |       |             |
|----------------------|---------------------|-------|-------------|-------|-------------|-------|-------------|
| mi Xelaev18034079m.g | Xelaev18034079m.g   | -3.89 | 0.51        | 0.28  | 1.00        | -1.60 | <b>0.01</b> |
| mi Xelaev18045677m.g | eln2.L              | -3.89 | 0.51        | 0.98  | 0.70        | -4.77 | <b>0.00</b> |
| mi Xelaev18036933m.g | Xelaev18036933m.g   | -3.89 | 0.51        | 0.67  | 0.57        | 6.99  | <b>0.00</b> |
| mi Xelaev18035220m.g | Xelaev18035220m.g   | -3.78 | <b>0.00</b> | -1.89 | <b>0.00</b> | -2.77 | <b>0.00</b> |
| mi Xelaev18001215m.g | trim14.S            | -3.57 | <b>0.01</b> | -2.53 | <b>0.00</b> | -0.82 | 0.21        |
| mi Xelaev18028299m.g | Xelaev18028299m.g   | -3.56 | <b>0.00</b> | 1.07  | 0.06        | -0.14 | 0.87        |
| mi Xelaev18016560m.g | arfip2.S            | -3.52 | <b>0.01</b> | 1.52  | 0.17        | -0.81 | 0.38        |
| mi Xelaev18016847m.g | ccdc69.L            | -3.49 | <b>0.01</b> | -0.14 | 0.90        | -0.04 | 1.00        |
| mi Xelaev18036007m.g | loc101730286.L      | -3.41 | 1.00        | -6.94 | <b>0.00</b> | -0.31 | 1.00        |
| mi Xelaev18039251m.g | Xelaev18039251m.g   | -3.40 | <b>0.00</b> | 0.69  | 0.43        | 0.08  | 1.00        |
| mi Xelaev18045920m.g | ikzf3.S             | -3.31 | <b>0.01</b> | -0.80 | 0.33        | -0.65 | 0.40        |
| mi Xelaev18032441m.g | loc101730807.L      | -3.23 | <b>0.00</b> | -0.19 | 0.73        | -0.40 | 0.51        |
| mi Xelaev18023707m.g | Xelaev18023707m.g   | -3.21 | <b>0.01</b> | 0.73  | 0.75        | -0.09 | 1.00        |
| mi Xelaev18012127m.g | loc101732121.L      | -3.10 | 0.01        | -0.67 | 0.14        | -1.88 | <b>0.00</b> |
| mi Xelaev18032566m.g | Xelaev18032566m.g   | -3.03 | <b>0.00</b> | 0.97  | 0.05        | 0.00  | 1.00        |
| mi Xelaev18039742m.g | Xelaev18039742m.g   | -2.98 | 1.00        | -6.59 | <b>0.00</b> | -1.90 | <b>0.01</b> |
| mi Xelaev18015051m.g | loc101732121.S      | -2.98 | 1.00        | -1.42 | 0.06        | -2.16 | <b>0.01</b> |
| mi Xelaev18031621m.g | loc100488932.L      | -2.98 | 1.00        | 0.00  | 1.00        | -7.67 | <b>0.00</b> |
| mi Xelaev18019499m.g | loc100491764.L      | -2.98 | 1.00        | 1.55  | 0.33        | -2.85 | <b>0.01</b> |
| mi Xelaev18029491m.g | loc100497103.S      | -2.98 | 1.00        | 4.10  | 0.51        | -9.03 | <b>0.00</b> |
| mi Xelaev18047055m.g | mcm6.2.S            | -2.88 | <b>0.00</b> | 1.32  | <b>0.00</b> | 0.72  | 0.09        |
| mi Xelaev18031299m.g | ccr3.L              | -2.87 | 0.02        | -2.67 | <b>0.00</b> | -0.95 | 0.13        |
| mi Xelaev18018099m.g | loc100497279-like.L | -2.87 | 0.02        | -0.39 | 0.46        | -3.13 | <b>0.00</b> |
| mi Xelaev18022083m.g | loc100493937.L      | -2.87 | 0.02        | 2.98  | <b>0.00</b> | 0.52  | 0.32        |
| mi Xelaev18020233m.g | stc1.S              | -2.86 | <b>0.00</b> | -0.21 | 0.77        | 0.25  | 0.69        |
| mi Xelaev18036111m.g | Xelaev18036111m.g   | -2.86 | <b>0.00</b> | -2.06 | <b>0.00</b> | -2.56 | <b>0.00</b> |
| mi Xelaev18003356m.g | Xelaev18003356m.g   | -2.86 | <b>0.00</b> | 1.18  | 0.06        | -0.50 | 0.47        |
| mi Xelaev18040474m.g | loc100488012.L      | -2.82 | <b>0.00</b> | 1.43  | 0.02        | 0.70  | 0.35        |
| mi Xelaev18011203m.g | Xelaev18011203m.g   | -2.76 | <b>0.00</b> | -1.38 | 0.05        | -0.67 | 0.31        |
| mi Xelaev18012479m.g | laptm5.L            | -2.76 | <b>0.00</b> | -1.35 | 0.03        | -0.20 | 0.84        |
| mi Xelaev18020745m.g | kiaa0101.S          | -2.75 | <b>0.00</b> | 0.48  | 0.26        | 0.19  | 0.66        |
| mi Xelaev18001333m.g | Xelaev18001333m.g   | -2.71 | 0.02        | -2.69 | 0.04        | -7.04 | <b>0.00</b> |
| mi Xelaev18029514m.g | agpat5.S            | -2.71 | <b>0.00</b> | -0.20 | 0.81        | 0.69  | 0.34        |
| mi Xelaev18038344m.g | phf19.L             | -2.68 | <b>0.00</b> | 0.12  | 0.92        | 0.55  | 0.37        |
| mi Xelaev18044707m.g | cdca7.L             | -2.67 | <b>0.00</b> | 0.90  | 0.03        | 0.65  | 0.12        |
| mi Xelaev18017994m.g | loc100496311-like.L | -2.64 | 0.01        | -0.40 | 0.43        | -1.77 | <b>0.00</b> |
| mi Xelaev18018083m.g | kiaa0101.L          | -2.62 | <b>0.00</b> | 0.53  | 0.21        | -0.03 | 0.95        |
| mi Xelaev18035512m.g | Xelaev18035512m.g   | -2.58 | <b>0.00</b> | -1.22 | <b>0.01</b> | -0.75 | 0.09        |
| mi Xelaev18042611m.g | suv39h1.S           | -2.58 | <b>0.00</b> | 0.19  | 0.80        | 0.30  | 0.63        |
| mi Xelaev18027929m.g | neu4.L              | -2.56 | <b>0.00</b> | -0.86 | 0.12        | -0.80 | 0.17        |
| mi Xelaev18044721m.g | Xelaev18044721m.g   | -2.54 | <b>0.00</b> | 1.52  | 0.06        | 3.72  | <b>0.00</b> |
| mi Xelaev18006472m.g | isyna1.L            | -2.52 | <b>0.00</b> | 0.87  | 0.04        | 0.48  | 0.25        |
| mi Xelaev18023987m.g | mcm2.L              | -2.50 | <b>0.00</b> | 1.16  | <b>0.01</b> | 0.45  | 0.28        |

|                      |                     |       |             |       |             |       |             |
|----------------------|---------------------|-------|-------------|-------|-------------|-------|-------------|
| mi Xelaev18016904m.g | Xelaev18016904m.g   | -2.48 | <b>0.00</b> | -0.26 | 0.64        | 0.51  | 0.36        |
| mi Xelaev18047779m.g | loc101733326.S      | -2.47 | 0.03        | -0.92 | 0.05        | -2.34 | <b>0.00</b> |
| mi Xelaev18037685m.g | loc100494984.S      | -2.47 | <b>0.00</b> | 1.01  | 0.31        | -0.05 | 1.00        |
| mi Xelaev18045526m.g | Xelaev18045526m.g   | -2.47 | <b>0.00</b> | 0.27  | 0.72        | 0.14  | 0.83        |
| mi Xelaev18045757m.g | loc105948426.L      | -2.45 | <b>0.00</b> | -1.37 | <b>0.00</b> | -0.69 | 0.11        |
| mi Xelaev18017570m.g | e2f7.L              | -2.45 | <b>0.00</b> | 0.48  | 0.29        | -0.03 | 0.98        |
| mi Xelaev18013921m.g | loc100491855-like.L | -2.45 | <b>0.00</b> | 0.55  | 0.44        | -0.07 | 1.00        |
| mi Xelaev18021143m.g | e2f7.S              | -2.44 | <b>0.00</b> | 1.12  | 0.01        | -0.06 | 0.95        |
| mi Xelaev18004500m.g | pik3ap1.S           | -2.43 | <b>0.00</b> | -0.26 | 0.64        | -1.68 | <b>0.00</b> |
| mi Xelaev18042718m.g | Xelaev18042718m.g   | -2.43 | <b>0.01</b> | -1.06 | 0.10        | -0.14 | 0.86        |
| mi Xelaev18046392m.g | Xelaev18046392m.g   | -2.43 | <b>0.01</b> | -0.83 | 0.26        | 0.36  | 0.85        |
| mi Xelaev18047570m.g | c7orf50.S           | -2.41 | <b>0.00</b> | 1.58  | <b>0.00</b> | -0.28 | 0.72        |
| mi Xelaev18028969m.g | stx11.S             | -2.41 | <b>0.00</b> | 0.09  | 0.95        | -1.61 | <b>0.01</b> |
| mi Xelaev18013994m.g | umod.2.L            | -2.39 | <b>0.00</b> | -0.99 | 0.02        | -1.57 | <b>0.00</b> |
| mi Xelaev18035905m.g | loc100494984.L      | -2.38 | <b>0.00</b> | 0.54  | 0.25        | 0.30  | 0.51        |
| mi Xelaev18032248m.g | ccne2.L             | -2.38 | <b>0.00</b> | 0.71  | 0.12        | 0.43  | 0.35        |
| mi Xelaev18031362m.g | loc100494665.L      | -2.37 | <b>0.00</b> | 0.83  | 0.17        | -1.23 | 0.02        |
| mi Xelaev18021944m.g | cyb5r2.L            | -2.35 | <b>0.00</b> | 0.48  | 0.54        | 0.27  | 0.89        |
| mi Xelaev18035483m.g | loc101732051.L      | -2.28 | 0.06        | -3.95 | <b>0.00</b> | -7.06 | <b>0.00</b> |
| mi Xelaev18040340m.g | Xelaev18040340m.g   | -2.28 | 0.06        | -2.24 | <b>0.00</b> | -1.49 | 0.04        |
| mi Xelaev18012623m.g | Xelaev18012623m.g   | -2.27 | <b>0.00</b> | -0.70 | 0.25        | 0.12  | 0.90        |
| mi Xelaev18015126m.g | rpa2.S              | -2.27 | <b>0.00</b> | 0.94  | 0.03        | 0.37  | 0.39        |
| mi Xelaev18021834m.g | prr5l.L             | -2.26 | <b>0.01</b> | 0.02  | 1.00        | -0.28 | 0.68        |
| mi Xelaev18032344m.g | anxa13.L            | -2.26 | <b>0.01</b> | 0.41  | 0.62        | 1.28  | 0.06        |
| mi Xelaev18038114m.g | suv39h1.L           | -2.24 | <b>0.00</b> | 0.65  | 0.16        | 0.12  | 0.84        |
| mi Xelaev18047177m.g | cdca7.S             | -2.24 | <b>0.00</b> | 1.00  | 0.02        | 0.36  | 0.40        |
| mi Xelaev18028222m.g | zmcm3.L             | -2.22 | <b>0.00</b> | 1.00  | 0.02        | 0.43  | 0.30        |
| mi Xelaev18043120m.g | krt12.L             | -2.22 | <b>0.00</b> | -1.33 | <b>0.00</b> | -1.69 | <b>0.00</b> |
| mi Xelaev18011415m.g | mx2.L               | -2.22 | <b>0.00</b> | 0.44  | 0.38        | 0.08  | 0.87        |
| mi Xelaev18032898m.g | Xelaev18032898m.g   | -2.20 | <b>0.01</b> | -0.30 | 0.84        | -0.04 | 1.00        |
| mi Xelaev18013147m.g | Xelaev18013147m.g   | -2.20 | <b>0.01</b> | 0.95  | 0.21        | 0.31  | 0.72        |
| mi Xelaev18020044m.g | cd74.S              | -2.20 | <b>0.00</b> | -1.57 | <b>0.00</b> | -0.81 | 0.05        |
| mi Xelaev18039147m.g | tap1.L              | -2.20 | <b>0.00</b> | 0.75  | 0.29        | -0.43 | 0.56        |
| mi Xelaev18024639m.g | Xelaev18024639m.g   | -2.18 | <b>0.00</b> | 0.84  | 0.10        | 1.05  | 0.04        |
| mi Xelaev18024217m.g | loc100126636.S      | -2.17 | <b>0.00</b> | 0.61  | 0.15        | 0.39  | 0.36        |
| mi Xelaev18014617m.g | ccl5.S              | -2.15 | 0.03        | -1.28 | 0.03        | -1.66 | <b>0.00</b> |
| mi Xelaev18001554m.g | Xelaev18001554m.g   | -2.15 | <b>0.00</b> | 1.00  | 0.03        | 0.25  | 0.60        |
| mi Xelaev18013438m.g | mars.L              | -2.15 | <b>0.00</b> | 0.71  | 0.17        | 0.85  | 0.11        |
| mi Xelaev18034957m.g | Xetrov90018123m.L   | -2.14 | <b>0.00</b> | -1.00 | 0.05        | -1.45 | 0.01        |
| mi Xelaev18028235m.g | Xelaev18028235m.g   | -2.12 | <b>0.00</b> | 0.23  | 0.62        | 0.56  | 0.20        |
| mi Xelaev18025680m.g | Xelaev18025680m.g   | -2.11 | <b>0.00</b> | 1.09  | 0.01        | 0.65  | 0.12        |
| mi Xelaev18017634m.g | tfec.L              | -2.09 | <b>0.01</b> | -1.17 | 0.03        | 0.36  | 0.55        |
| mi Xelaev18015006m.g | tuba3c.S            | -2.09 | <b>0.00</b> | 0.72  | 0.08        | 0.46  | 0.27        |



|                      |                   |       |             |       |             |       |             |
|----------------------|-------------------|-------|-------------|-------|-------------|-------|-------------|
| mi Xelaev18043986m.g | e2f1.L            | -2.08 | <b>0.00</b> | 1.53  | <b>0.00</b> | 0.36  | 0.45        |
| mi Xelaev18032996m.g | rpa3.S            | -2.06 | <b>0.00</b> | 0.42  | 0.36        | 0.08  | 0.87        |
| mi Xelaev18025789m.g | manf.S            | -2.06 | <b>0.00</b> | 1.10  | 0.01        | 0.60  | 0.16        |
| mi Xelaev18033043m.g | cdca7l.S          | -2.06 | <b>0.00</b> | 0.10  | 0.94        | 0.59  | 0.31        |
| mi Xelaev18015481m.g | gk.S              | -2.05 | <b>0.00</b> | 0.46  | 0.33        | -0.01 | 1.00        |
| mi Xelaev18018522m.g | loc100485269.L    | -2.05 | <b>0.00</b> | 0.96  | 0.03        | 0.39  | 0.36        |
| mi Xelaev18011207m.g | slc22a15.1.L      | -2.04 | <b>0.00</b> | 0.59  | 0.24        | 0.21  | 0.72        |
| mi Xelaev18043892m.g | znfx1.L           | -2.02 | <b>0.00</b> | 0.60  | 0.28        | -0.30 | 0.56        |
| mi Xelaev18014939m.g | ube2t.S           | -2.02 | <b>0.00</b> | 0.73  | 0.10        | 0.08  | 0.91        |
| mi Xelaev18020338m.g | pcna.S            | -2.02 | <b>0.00</b> | 0.74  | 0.08        | 0.23  | 0.57        |
| mi Xelaev18044530m.g | mcm6.2.L          | -2.01 | <b>0.00</b> | 0.94  | 0.02        | 0.45  | 0.29        |
| mi Xelaev18007315m.g | Xetrov90002577m.L | -2.01 | 0.25        | -2.99 | <b>0.00</b> | -0.42 | 0.56        |
| mi Xelaev18011199m.g | Xelaev18011199m.g | -2.01 | 0.25        | -3.15 | <b>0.00</b> | -0.55 | 0.65        |
| mi Xelaev18032204m.g | esrp1.L           | -2.01 | 0.25        | -1.04 | 0.16        | -3.37 | <b>0.00</b> |
| mi Xelaev18009370m.g | sec24d-like.1.S   | -2.00 | <b>0.00</b> | 0.99  | 0.05        | 0.26  | 0.68        |
| mi Xelaev18012305m.g | loc101734700.L    | -1.99 | 0.01        | -2.76 | <b>0.00</b> | 0.39  | 0.44        |
| mi Xelaev18022635m.g | has3.L            | -1.99 | <b>0.00</b> | 0.85  | 0.11        | -0.18 | 0.74        |
| mi Xelaev18036044m.g | rcn3.L            | -1.98 | <b>0.00</b> | 0.01  | 0.99        | 0.25  | 0.58        |
| mi Xelaev18042619m.g | ebp.S             | -1.98 | <b>0.00</b> | 0.42  | 0.36        | 0.17  | 0.70        |
| mi Xelaev18011472m.g | smim11a.L         | -1.97 | <b>0.00</b> | 0.71  | 0.14        | 0.38  | 0.48        |
| mi Xelaev18003303m.g | kdelc2.L          | -1.96 | <b>0.00</b> | 0.48  | 0.28        | 0.45  | 0.35        |
| mi Xelaev18025556m.g | mcm5.S            | -1.96 | <b>0.00</b> | 0.92  | 0.03        | 0.77  | 0.07        |
| mi Xelaev18036887m.g | hhex.S            | -1.95 | <b>0.00</b> | -0.61 | 0.24        | 0.28  | 0.65        |
| mi Xelaev18002538m.g | usp18.L           | -1.95 | <b>0.00</b> | 0.85  | 0.18        | 0.32  | 0.59        |
| mi Xelaev18015874m.g | cdk2.S            | -1.95 | <b>0.00</b> | 0.78  | 0.07        | 0.26  | 0.55        |
| mi Xelaev18031417m.g | Xetrov90016017m.L | -1.95 | <b>0.00</b> | 0.36  | 0.54        | 0.17  | 0.76        |
| mi Xelaev18006960m.g | znf367.L          | -1.94 | <b>0.00</b> | 1.38  | <b>0.01</b> | 0.31  | 0.58        |
| mi Xelaev18001683m.g | Xelaev18001683m.g | -1.94 | 0.13        | -0.55 | 0.65        | -3.02 | <b>0.00</b> |
| mi Xelaev18009179m.g | msmo1.S           | -1.93 | <b>0.00</b> | 0.37  | 0.39        | 0.06  | 0.90        |
| mi Xelaev18033586m.g | loc100492069.S    | -1.92 | <b>0.00</b> | 0.70  | 0.16        | 0.17  | 0.72        |
| mi Xelaev18035389m.g | c1qtnf5.L         | -1.92 | <b>0.00</b> | 1.00  | 0.06        | 1.36  | 0.01        |
| mi Xelaev18013189m.g | loc100490530.L    | -1.91 | <b>0.00</b> | 0.52  | 0.23        | 0.19  | 0.67        |
| mi Xelaev18007079m.g | loc548369.L       | -1.91 | 0.06        | -3.12 | <b>0.00</b> | -3.32 | <b>0.00</b> |
| mi Xelaev18030303m.g | emilin1.S         | -1.90 | <b>0.00</b> | 0.26  | 0.55        | 0.36  | 0.40        |
| mi Xelaev18021948m.g | olfml1.L          | -1.90 | <b>0.00</b> | 0.16  | 0.84        | -0.63 | 0.27        |
| mi Xelaev18023847m.g | manf.L            | -1.90 | <b>0.00</b> | 0.95  | 0.03        | 0.46  | 0.28        |
| mi Xelaev18015054m.g | Xelaev18015054m.g | -1.90 | 0.03        | -0.77 | 0.07        | -1.45 | <b>0.00</b> |
| mi Xelaev18044607m.g | wdsub1.L          | -1.89 | <b>0.00</b> | -0.01 | 1.00        | -0.24 | 0.64        |
| mi Xelaev18047780m.g | Xelaev18047780m.g | -1.89 | 0.02        | -0.61 | 0.18        | -2.49 | <b>0.00</b> |
| mi Xelaev18013377m.g | cdk2.L            | -1.88 | <b>0.00</b> | 0.68  | 0.10        | 0.32  | 0.44        |
| mi Xelaev18039592m.g | vrk1.L            | -1.87 | <b>0.00</b> | 0.50  | 0.25        | 0.35  | 0.43        |
| mi Xelaev18014996m.g | arg2.S            | -1.87 | <b>0.00</b> | 0.58  | 0.17        | -0.11 | 0.79        |
| mi Xelaev18019057m.g | farsa.L           | -1.87 | <b>0.00</b> | 0.92  | 0.03        | 0.59  | 0.17        |

|                      |                     |       |             |       |             |       |             |
|----------------------|---------------------|-------|-------------|-------|-------------|-------|-------------|
| mi Xelaev18011643m.g | bcl7b.L             | -1.86 | <b>0.00</b> | 0.79  | 0.07        | 0.14  | 0.75        |
| mi Xelaev18010866m.g | loc733945.S         | -1.85 | <b>0.00</b> | 0.72  | 0.12        | 0.16  | 0.83        |
| mi Xelaev18027985m.g | ccl34.L             | -1.84 | <b>0.00</b> | 1.13  | 0.03        | 4.70  | <b>0.00</b> |
| mi Xelaev18017782m.g | lrrc17.L            | -1.84 | <b>0.00</b> | 0.36  | 0.42        | -0.16 | 0.74        |
| mi Xelaev18013725m.g | hsph1.L             | -1.84 | <b>0.00</b> | 0.90  | 0.04        | 0.52  | 0.22        |
| mi Xelaev18039138m.g | Xelaev18039138m.g   | -1.83 | <b>0.00</b> | -1.11 | 0.02        | -1.23 | <b>0.01</b> |
| mi Xelaev18000877m.g | mcm7.S              | -1.83 | <b>0.00</b> | 0.68  | 0.10        | 0.33  | 0.43        |
| mi Xelaev18028040m.g | rrm2.2.L            | -1.83 | <b>0.00</b> | 0.33  | 0.43        | -0.04 | 0.93        |
| mi Xelaev18009948m.g | isyna1.S            | -1.82 | <b>0.00</b> | 0.50  | 0.25        | 0.15  | 0.72        |
| mi Xelaev18039633m.g | lrr1.L              | -1.82 | <b>0.00</b> | 0.27  | 0.57        | -0.29 | 0.56        |
| mi Xelaev18027728m.g | pcolce2.L           | -1.81 | <b>0.00</b> | -0.14 | 0.75        | 0.43  | 0.31        |
| mi Xelaev18034668m.g | npm3.L              | -1.80 | <b>0.00</b> | 1.42  | <b>0.00</b> | 0.59  | 0.18        |
| mi Xelaev18047637m.g | crym.S              | -1.80 | <b>0.00</b> | 0.16  | 0.73        | 0.45  | 0.35        |
| mi Xelaev18036014m.g | loc100493902.L      | -1.80 | <b>0.00</b> | -0.97 | 0.04        | -0.01 | 1.00        |
| mi Xelaev18045102m.g | hbg1.L              | -1.80 | 0.19        | 0.59  | 0.78        | -3.37 | <b>0.00</b> |
| mi Xelaev18021917m.g | rdm1-like.L         | -1.79 | <b>0.00</b> | 0.32  | 0.50        | -0.72 | 0.14        |
| mi Xelaev18020367m.g | loc100485269.S      | -1.78 | <b>0.00</b> | 0.90  | 0.04        | 0.26  | 0.54        |
| mi Xelaev18040846m.g | loc100488697.L      | -1.78 | <b>0.01</b> | -1.58 | <b>0.00</b> | 1.41  | 0.01        |
| mi Xelaev18045905m.g | cdc6.S              | -1.78 | <b>0.00</b> | 0.71  | 0.13        | 0.23  | 0.64        |
| mi Xelaev18027786m.g | farsb.L             | -1.77 | <b>0.00</b> | 1.04  | 0.01        | 0.47  | 0.27        |
| mi Xelaev18025634m.g | loc101734319.S      | -1.77 | <b>0.00</b> | 0.23  | 0.62        | -0.10 | 0.86        |
| mi Xelaev18004056m.g | Xelaev18004056m.g   | -1.77 | 0.03        | -2.14 | <b>0.00</b> | 0.37  | 0.52        |
| mi Xelaev18015037m.g | Xelaev18015037m.g   | -1.77 | 0.01        | -0.86 | 0.04        | -1.65 | <b>0.00</b> |
| mi Xelaev18044351m.g | Xelaev18044351m.g   | -1.76 | <b>0.01</b> | 0.74  | 0.23        | 0.30  | 0.63        |
| mi Xelaev18039025m.g | vgl1.L              | -1.75 | 0.40        | -0.56 | 0.47        | -3.49 | <b>0.00</b> |
| mi Xelaev18030637m.g | loc101733516-like.L | -1.75 | 0.40        | 0.79  | 0.44        | -2.11 | <b>0.00</b> |
| mi Xelaev18030082m.g | odc1.S              | -1.75 | <b>0.00</b> | 0.91  | 0.03        | 0.26  | 0.53        |
| mi Xelaev18031891m.g | tyms.L              | -1.74 | <b>0.00</b> | 0.58  | 0.17        | 0.21  | 0.63        |
| mi Xelaev18038825m.g | tnmd.L              | -1.74 | <b>0.01</b> | -1.88 | <b>0.00</b> | -0.91 | 0.19        |
| mi Xelaev18029627m.g | Xelaev18029627m.g   | -1.74 | <b>0.00</b> | 0.38  | 0.40        | 0.11  | 0.82        |
| mi Xelaev18013138m.g | uggt2.L             | -1.73 | <b>0.00</b> | 0.93  | 0.03        | 0.13  | 0.78        |
| mi Xelaev18030897m.g | rpa3.L              | -1.73 | <b>0.00</b> | 0.86  | 0.04        | 0.09  | 0.83        |
| mi Xelaev18023929m.g | rad18.L             | -1.73 | <b>0.00</b> | -0.06 | 0.94        | 0.08  | 0.89        |
| mi Xelaev18039725m.g | trmt61a.L           | -1.73 | <b>0.00</b> | 0.95  | 0.03        | 0.88  | 0.05        |
| mi Xelaev18040019m.g | dtd2.L              | -1.73 | <b>0.00</b> | 0.17  | 0.73        | 0.31  | 0.52        |
| mi Xelaev18035692m.g | Xelaev18035692m.g   | -1.72 | 0.12        | 2.19  | <b>0.01</b> | -1.00 | 0.19        |
| mi Xelaev18006820m.g | mlana-like.L        | -1.72 | 0.12        | 0.40  | 0.67        | -2.08 | <b>0.00</b> |
| mi Xelaev18012770m.g | psph.L              | -1.72 | <b>0.00</b> | 1.27  | <b>0.00</b> | 0.35  | 0.42        |
| mi Xelaev18022776m.g | orc6.L              | -1.71 | <b>0.00</b> | 0.63  | 0.15        | 0.34  | 0.45        |
| mi Xelaev18028268m.g | ptrhd1.L            | -1.71 | <b>0.00</b> | 0.46  | 0.29        | 0.30  | 0.49        |
| mi Xelaev18007801m.g | kntc1.L             | -1.70 | <b>0.00</b> | 0.41  | 0.34        | 0.02  | 0.98        |
| mi Xelaev18026654m.g | eif2ak2.L           | -1.70 | <b>0.00</b> | 0.71  | 0.11        | 0.69  | 0.12        |
| mi Xelaev18033485m.g | rbm24.S             | -1.69 | <b>0.00</b> | 0.46  | 0.42        | -0.42 | 0.43        |

|                      |                   |       |             |       |             |       |             |
|----------------------|-------------------|-------|-------------|-------|-------------|-------|-------------|
| mi Xelaev18031850m.g | loc100492069.L    | -1.69 | <b>0.00</b> | 0.12  | 0.78        | 0.49  | 0.24        |
| mi Xelaev18034336m.g | slc2a3.L          | -1.69 | <b>0.00</b> | -0.32 | 0.53        | -0.98 | 0.04        |
| mi Xelaev18038451m.g | hspa5.L           | -1.69 | <b>0.00</b> | 1.17  | <b>0.01</b> | 0.44  | 0.28        |
| mi Xelaev18041802m.g | hspa5.S           | -1.68 | <b>0.00</b> | 1.24  | <b>0.00</b> | 0.42  | 0.31        |
| mi Xelaev18019237m.g | Xelaev18019237m.g | -1.68 | 0.01        | -1.12 | 0.04        | -1.35 | <b>0.01</b> |
| mi Xelaev18003621m.g | Xelaev18003621m.g | -1.68 | <b>0.01</b> | -0.13 | 0.83        | 0.43  | 0.49        |
| mi Xelaev18003932m.g | msmo1.L           | -1.68 | <b>0.00</b> | 0.48  | 0.27        | 0.25  | 0.55        |
| mi Xelaev18039046m.g | slc1a5.L          | -1.68 | <b>0.00</b> | 1.46  | <b>0.00</b> | 0.36  | 0.39        |
| mi Xelaev18030195m.g | Xelaev18030195m.g | -1.68 | <b>0.00</b> | 0.92  | 0.04        | 0.10  | 0.81        |
| mi Xelaev18043312m.g | higd1b.L          | -1.68 | <b>0.01</b> | -0.52 | 0.33        | -0.75 | 0.17        |
| mi Xelaev18030970m.g | cycs.L            | -1.68 | <b>0.00</b> | 0.74  | 0.08        | 0.33  | 0.43        |
| mi Xelaev18020849m.g | lmf2.S            | -1.67 | <b>0.00</b> | 0.91  | 0.05        | 1.01  | 0.03        |
| mi Xelaev18022958m.g | rpe65.L           | -1.67 | <b>0.01</b> | -0.11 | 0.82        | -0.23 | 0.70        |
| mi Xelaev18040854m.g | Xelaev18040854m.g | -1.67 | <b>0.01</b> | -0.06 | 0.95        | -0.27 | 0.60        |
| mi Xelaev18015189m.g | cdca8.S           | -1.67 | <b>0.00</b> | 0.10  | 0.85        | 0.00  | 1.00        |
| mi Xelaev18017384m.g | hsp90b1.L         | -1.67 | <b>0.00</b> | 1.05  | 0.01        | 0.39  | 0.34        |
| mi Xelaev18016256m.g | mmp7.S            | -1.66 | <b>0.00</b> | -1.70 | <b>0.00</b> | -0.79 | 0.19        |
| mi Xelaev18030079m.g | rrm2.2.S          | -1.66 | <b>0.00</b> | 0.44  | 0.29        | -0.10 | 0.81        |
| mi Xelaev18047548m.g | nudt1.S           | -1.65 | <b>0.00</b> | 0.86  | 0.04        | 0.31  | 0.47        |
| mi Xelaev18046644m.g | e2f1.S            | -1.65 | <b>0.00</b> | 0.88  | 0.05        | 0.19  | 0.69        |
| mi Xelaev18016115m.g | ebpl.S            | -1.65 | <b>0.00</b> | 0.63  | 0.15        | 0.03  | 0.95        |
| mi Xelaev18019361m.g | gstp1.L           | -1.65 | <b>0.00</b> | 1.40  | <b>0.00</b> | 2.11  | <b>0.00</b> |
| mi Xelaev18025161m.g | tmem125.S         | -1.65 | <b>0.01</b> | -0.25 | 0.70        | -1.26 | 0.09        |
| mi Xelaev18034537m.g | oat.1.L           | -1.64 | <b>0.00</b> | 0.29  | 0.52        | 0.11  | 0.80        |
| mi Xelaev18032773m.g | higd1a.S          | -1.64 | <b>0.00</b> | 0.64  | 0.15        | 0.43  | 0.32        |
| mi Xelaev18023851m.g | hemk1.L           | -1.64 | <b>0.00</b> | 0.79  | 0.08        | 0.70  | 0.12        |
| mi Xelaev18002493m.g | akr1c2.L          | -1.63 | <b>0.00</b> | -0.02 | 0.97        | 1.27  | 0.01        |
| mi Xelaev18032592m.g | abcf2.S           | -1.62 | <b>0.00</b> | 0.80  | 0.06        | 0.51  | 0.22        |
| mi Xelaev18015143m.g | clspn.S           | -1.62 | <b>0.00</b> | 0.85  | 0.05        | 0.14  | 0.74        |
| mi Xelaev18031991m.g | mcm4.L            | -1.62 | <b>0.00</b> | 1.05  | 0.01        | 0.53  | 0.20        |
| mi Xelaev18012948m.g | loc100490253.L    | -1.61 | 0.17        | -3.15 | <b>0.00</b> | -1.13 | 0.06        |
| mi Xelaev18013131m.g | Xetrov90006020m.L | -1.61 | 0.17        | 6.34  | <b>0.00</b> | 0.87  | 0.59        |
| mi Xelaev18011478m.g | donson.L          | -1.61 | <b>0.00</b> | 0.27  | 0.56        | -0.07 | 0.89        |
| mi Xelaev18001975m.g | Xelaev18001975m.g | -1.60 | 0.17        | 3.66  | <b>0.00</b> | 0.48  | 1.00        |
| mi Xelaev18023218m.g | dhcr24.L          | -1.60 | <b>0.00</b> | 0.19  | 0.67        | 0.33  | 0.45        |
| mi Xelaev18005788m.g | Xelaev18005788m.g | -1.60 | <b>0.00</b> | 0.81  | 0.06        | 0.15  | 0.73        |
| mi Xelaev18009263m.g | smarca5.S         | -1.60 | <b>0.00</b> | 0.67  | 0.11        | 0.25  | 0.55        |
| mi Xelaev18012341m.g | slc16a1.L         | -1.60 | <b>0.00</b> | 0.69  | 0.11        | 0.38  | 0.38        |
| mi Xelaev18027199m.g | cep57l1.L         | -1.59 | <b>0.00</b> | 0.05  | 0.94        | 0.02  | 0.98        |
| mi Xelaev18037689m.g | tnnt1.S           | -1.58 | <b>0.00</b> | 0.47  | 0.46        | -0.80 | 0.16        |
| mi Xelaev18025959m.g | ccdc3-like.2.S    | -1.58 | 0.06        | -2.28 | <b>0.00</b> | 0.30  | 0.73        |
| mi Xelaev18046413m.g | loc100497487.S    | -1.57 | <b>0.00</b> | 0.98  | 0.04        | 0.63  | 0.19        |
| mi Xelaev18032379m.g | sqle.L            | -1.56 | <b>0.00</b> | 0.35  | 0.46        | 0.42  | 0.35        |

|                      |                   |       |             |       |             |       |             |
|----------------------|-------------------|-------|-------------|-------|-------------|-------|-------------|
| mi Xelaev18024120m.g | loc100491288.L    | -1.56 | <b>0.00</b> | 0.44  | 0.35        | 0.50  | 0.30        |
| mi Xelaev18026675m.g | loc101735110.L    | -1.56 | 0.40        | -0.86 | 0.30        | -2.79 | <b>0.00</b> |
| mi Xelaev18008591m.g | Xelaev18008591m.g | -1.56 | 0.15        | -1.94 | <b>0.00</b> | 0.06  | 1.00        |
| mi Xelaev18025227m.g | pik3r3.S          | -1.56 | <b>0.00</b> | 0.63  | 0.21        | 0.02  | 1.00        |
| mi Xelaev18011675m.g | blmh.L            | -1.55 | <b>0.00</b> | 0.78  | 0.06        | 0.21  | 0.63        |
| mi Xelaev18008117m.g | dhfr.L            | -1.55 | <b>0.00</b> | 0.45  | 0.32        | 0.20  | 0.66        |
| mi Xelaev18008734m.g | sfxn5.S           | -1.55 | <b>0.01</b> | 0.58  | 0.31        | 0.18  | 0.78        |
| mi Xelaev18047992m.g | loc398467.S       | -1.54 | <b>0.00</b> | 0.90  | 0.04        | 0.74  | 0.09        |
| mi Xelaev18017827m.g | mcm10.L           | -1.54 | <b>0.00</b> | 0.30  | 0.51        | -0.07 | 0.90        |
| mi Xelaev18017115m.g | dck.2.L           | -1.54 | <b>0.00</b> | 0.71  | 0.11        | -0.01 | 0.98        |
| mi Xelaev18024332m.g | fen1.S            | -1.54 | <b>0.00</b> | 0.78  | 0.07        | 0.36  | 0.40        |
| mi Xelaev18007557m.g | gatc-like.L       | -1.54 | <b>0.00</b> | 0.59  | 0.17        | 0.10  | 0.84        |
| mi Xelaev18007632m.g | loc100493155.L    | -1.53 | <b>0.00</b> | -0.09 | 0.83        | 0.24  | 0.61        |
| mi Xelaev18025893m.g | mcm2.S            | -1.53 | <b>0.00</b> | 1.11  | <b>0.01</b> | 0.25  | 0.56        |
| mi Xelaev18038250m.g | Xelaev18038250m.g | -1.53 | <b>0.01</b> | -0.71 | 0.14        | -1.06 | 0.02        |
| mi Xelaev18026606m.g | mgme1.L           | -1.53 | <b>0.01</b> | -0.21 | 0.70        | 0.10  | 0.84        |
| mi Xelaev18034687m.g | exosc1.L          | -1.52 | <b>0.00</b> | 0.74  | 0.09        | 0.44  | 0.31        |
| mi Xelaev18033701m.g | mcm4.S            | -1.52 | <b>0.00</b> | 1.04  | 0.02        | 0.41  | 0.34        |
| mi Xelaev18047799m.g | med9.S            | -1.52 | <b>0.00</b> | 0.11  | 0.82        | 0.19  | 0.70        |
| mi Xelaev18012154m.g | Xelaev18012154m.g | -1.51 | <b>0.00</b> | -0.54 | 0.26        | -0.51 | 0.31        |
| mi Xelaev18008853m.g | spon2.S           | -1.51 | <b>0.00</b> | -0.35 | 0.45        | 0.91  | 0.05        |
| mi Xelaev18023891m.g | poc1a.L           | -1.50 | <b>0.01</b> | 0.89  | 0.10        | 0.49  | 0.39        |
| mi Xelaev18010558m.g | pgam5.S           | -1.50 | <b>0.00</b> | 0.73  | 0.09        | 0.36  | 0.41        |
| mi Xelaev18037790m.g | Xelaev18037790m.g | -1.50 | <b>0.00</b> | 0.78  | 0.06        | 0.28  | 0.50        |
| mi Xelaev18012486m.g | loc100497282.L    | -1.50 | <b>0.01</b> | -0.32 | 0.52        | -0.22 | 0.70        |
| mi Xelaev18025187m.g | nasp.S            | -1.50 | <b>0.00</b> | 0.58  | 0.17        | -0.09 | 0.84        |
| mi Xelaev18020998m.g | Xelaev18020998m.g | -1.50 | 0.24        | -2.44 | <b>0.00</b> | -1.43 | 0.02        |
| mi Xelaev18023880m.g | arhgdib.L         | -1.50 | <b>0.00</b> | -1.97 | <b>0.00</b> | -0.36 | 0.39        |
| mi Xelaev18007810m.g | b3gnt4.L          | -1.49 | <b>0.00</b> | 0.45  | 0.28        | 0.17  | 0.70        |
| mi Xelaev18016180m.g | hsph1.S           | -1.49 | <b>0.00</b> | 0.91  | 0.03        | 0.38  | 0.36        |
| mi Xelaev18010191m.g | cks2.S            | -1.49 | <b>0.00</b> | 0.09  | 0.84        | 0.08  | 0.89        |
| mi Xelaev18007758m.g | aacs.L            | -1.49 | <b>0.00</b> | 0.38  | 0.36        | 0.20  | 0.63        |
| mi Xelaev18025098m.g | rpe65.S           | -1.48 | <b>0.00</b> | 0.11  | 0.82        | 0.08  | 0.90        |
| mi Xelaev18044349m.g | Xelaev18044349m.g | -1.48 | <b>0.00</b> | 0.52  | 0.27        | 0.97  | 0.06        |
| mi Xelaev18023178m.g | orc1.L            | -1.48 | <b>0.00</b> | 0.71  | 0.11        | 0.46  | 0.29        |
| mi Xelaev18007012m.g | ipo4.L            | -1.48 | <b>0.00</b> | 0.91  | 0.03        | 0.67  | 0.12        |
| mi Xelaev18004185m.g | c1qb.L            | -1.48 | <b>0.00</b> | -1.71 | <b>0.00</b> | -1.15 | <b>0.01</b> |
| mi Xelaev18028001m.g | tmem18.L          | -1.47 | <b>0.00</b> | -0.13 | 0.82        | 0.25  | 0.63        |
| mi Xelaev18044855m.g | bard1.L           | -1.47 | <b>0.00</b> | 0.39  | 0.40        | 0.25  | 0.60        |
| mi Xelaev18002599m.g | Xelaev18002599m.g | -1.46 | <b>0.00</b> | -0.47 | 0.30        | -0.27 | 0.54        |
| mi Xelaev18017677m.g | tmem229a.L        | -1.46 | <b>0.00</b> | 0.43  | 0.36        | 0.23  | 0.61        |
| mi Xelaev18005686m.g | mad2l1.L          | -1.46 | <b>0.00</b> | 0.18  | 0.70        | -0.23 | 0.66        |
| mi Xelaev18030853m.g | cyp51a1.L         | -1.45 | <b>0.00</b> | 0.33  | 0.44        | 0.47  | 0.26        |

|                      |                     |       |             |       |             |       |             |
|----------------------|---------------------|-------|-------------|-------|-------------|-------|-------------|
| mi Xelaev18005620m.g | ccna2.L             | -1.45 | <b>0.00</b> | 0.30  | 0.49        | 0.05  | 0.91        |
| mi Xelaev18022668m.g | chst6.L             | -1.45 | <b>0.00</b> | -0.17 | 0.76        | -0.27 | 0.58        |
| mi Xelaev18028467m.g | Xelaev18028467m.g   | -1.44 | 0.64        | -0.07 | 1.00        | -2.19 | <b>0.00</b> |
| mi Xelaev18043014m.g | muc1.S              | -1.44 | 0.64        | -0.47 | 0.45        | -2.57 | <b>0.00</b> |
| mi Xelaev18045538m.g | Xelaev18045538m.g   | -1.44 | 0.64        | -1.38 | 0.03        | -2.03 | <b>0.00</b> |
| mi Xelaev18046397m.g | kcnj16.S            | -1.44 | 0.64        | -0.67 | 0.47        | -2.85 | <b>0.01</b> |
| mi Xelaev18010407m.g | Xetrov90002799m.S   | -1.44 | 0.64        | 3.77  | <b>0.00</b> | -0.84 | 1.00        |
| mi Xelaev18027830m.g | agxt.L              | -1.44 | 0.64        | -2.80 | <b>0.00</b> | 0.33  | 1.00        |
| mi Xelaev18022567m.g | cenpn.L             | -1.44 | <b>0.00</b> | -0.02 | 1.00        | 0.47  | 0.35        |
| mi Xelaev18031900m.g | abhd3.L             | -1.44 | <b>0.00</b> | -0.11 | 0.81        | 0.15  | 0.73        |
| mi Xelaev18004404m.g | hyou1.S             | -1.44 | <b>0.00</b> | 0.92  | 0.03        | 0.20  | 0.64        |
| mi Xelaev18003153m.g | abcb8.L             | -1.43 | <b>0.00</b> | 0.50  | 0.25        | 0.34  | 0.44        |
| mi Xelaev18000775m.g | farsa.S             | -1.43 | <b>0.00</b> | 0.79  | 0.06        | 0.47  | 0.26        |
| mi Xelaev18031586m.g | tubb2b.L            | -1.43 | <b>0.00</b> | 0.33  | 0.43        | 0.21  | 0.61        |
| mi Xelaev18033544m.g | cndp2.S             | -1.43 | <b>0.00</b> | -0.95 | 0.02        | -0.32 | 0.44        |
| mi Xelaev18007818m.g | hpd-like.1.L        | -1.43 | <b>0.00</b> | 0.17  | 0.67        | 0.24  | 0.56        |
| mi Xelaev18043830m.g | psme3.L             | -1.43 | <b>0.00</b> | 0.71  | 0.09        | 0.19  | 0.64        |
| mi Xelaev18027784m.g | sgpp2.L             | -1.42 | <b>0.00</b> | 0.97  | 0.03        | 0.16  | 0.72        |
| mi Xelaev18020619m.g | Xelaev18020619m.g   | -1.42 | <b>0.00</b> | 0.45  | 0.30        | 0.33  | 0.46        |
| mi Xelaev18034801m.g | hells.L             | -1.42 | <b>0.00</b> | 0.75  | 0.08        | 0.45  | 0.29        |
| mi Xelaev18016415m.g | serpinh1.S          | -1.42 | <b>0.00</b> | 0.41  | 0.32        | 0.10  | 0.81        |
| mi Xelaev18005162m.g | loc100488322.L      | -1.42 | <b>0.01</b> | 0.09  | 0.85        | -0.10 | 0.85        |
| mi Xelaev18011098m.g | lipg.S              | -1.42 | <b>0.00</b> | 0.47  | 0.26        | 0.14  | 0.74        |
| mi Xelaev18042873m.g | loc100485201-like.S | -1.42 | <b>0.01</b> | 0.18  | 0.71        | 0.22  | 0.66        |
| mi Xelaev18012909m.g | gk.L                | -1.41 | <b>0.00</b> | 0.51  | 0.27        | 0.40  | 0.37        |
| mi Xelaev18039628m.g | pole2.L             | -1.41 | <b>0.00</b> | 0.36  | 0.41        | 0.33  | 0.45        |
| mi Xelaev18002995m.g | slc6a13.L           | -1.41 | <b>0.00</b> | -0.24 | 0.55        | 0.47  | 0.26        |
| mi Xelaev18018556m.g | pcna.L              | -1.41 | <b>0.00</b> | 0.41  | 0.32        | 0.22  | 0.59        |
| mi Xelaev18018247m.g | cdc42se2-like.2.L   | -1.41 | <b>0.00</b> | 0.49  | 0.27        | 0.19  | 0.67        |
| mi Xelaev18032976m.g | col1a2.S            | -1.41 | <b>0.00</b> | 0.17  | 0.68        | 0.02  | 0.97        |
| mi Xelaev18022034m.g | fen1.L              | -1.41 | <b>0.00</b> | 0.34  | 0.41        | 0.31  | 0.46        |
| mi Xelaev18011723m.g | Xelaev18011723m.g   | -1.41 | <b>0.01</b> | 0.01  | 1.00        | -0.18 | 0.71        |
| mi Xelaev18026477m.g | plek.L              | -1.41 | <b>0.01</b> | -0.95 | 0.04        | 0.16  | 0.75        |
| mi Xelaev18033246m.g | psma2.S             | -1.41 | <b>0.00</b> | 0.43  | 0.30        | 0.21  | 0.61        |
| mi Xelaev18015839m.g | tuba1c.S            | -1.40 | <b>0.00</b> | 0.19  | 0.65        | 0.23  | 0.57        |
| mi Xelaev18011452m.g | chaf1b.L            | -1.40 | <b>0.00</b> | 0.43  | 0.33        | 0.26  | 0.56        |
| mi Xelaev18047894m.g | phgdh.S             | -1.40 | <b>0.00</b> | 1.13  | <b>0.01</b> | 0.27  | 0.52        |
| mi Xelaev18033497m.g | e2f3.S              | -1.40 | <b>0.00</b> | 0.52  | 0.24        | 0.39  | 0.39        |
| mi Xelaev18020080m.g | sec24a.S            | -1.40 | <b>0.01</b> | -0.42 | 0.40        | -0.57 | 0.25        |
| mi Xelaev18047351m.g | plcl1.S             | -1.40 | <b>0.01</b> | 0.06  | 0.90        | 0.42  | 0.39        |
| mi Xelaev18020309m.g | ncaph.S             | -1.40 | <b>0.00</b> | 0.17  | 0.70        | 0.46  | 0.30        |
| mi Xelaev18013439m.g | Xetrov90006328m.L   | -1.40 | <b>0.00</b> | 0.91  | 0.03        | 0.74  | 0.09        |
| mi Xelaev18004059m.g | gale.S              | -1.40 | <b>0.00</b> | 0.45  | 0.32        | 0.48  | 0.29        |

|                      |                     |       |             |       |             |       |             |
|----------------------|---------------------|-------|-------------|-------|-------------|-------|-------------|
| mi Xelaev18017957m.g | cttn-like.1.L       | -1.39 | <b>0.01</b> | -1.07 | 0.02        | -0.92 | 0.04        |
| mi Xelaev18015084m.g | fgr.S               | -1.39 | <b>0.01</b> | -1.14 | 0.02        | -0.41 | 0.39        |
| mi Xelaev18026213m.g | flvcr1.L            | -1.39 | <b>0.00</b> | 0.51  | 0.24        | 0.19  | 0.65        |
| mi Xelaev18012625m.g | gale.L              | -1.38 | <b>0.01</b> | 0.32  | 0.49        | 0.32  | 0.53        |
| mi Xelaev18023164m.g | cdkn2c.L            | -1.38 | <b>0.01</b> | 0.27  | 0.56        | 0.45  | 0.39        |
| mi Xelaev18033829m.g | pmp2.S              | -1.37 | <b>0.00</b> | -3.77 | <b>0.00</b> | 0.21  | 0.63        |
| mi Xelaev18027677m.g | slc33a1.L           | -1.37 | <b>0.00</b> | 0.49  | 0.28        | 0.13  | 0.81        |
| mi Xelaev18009215m.g | tlr2.S              | -1.37 | 0.24        | -0.48 | 0.56        | -2.09 | <b>0.00</b> |
| mi Xelaev18009326m.g | ccna2.S             | -1.37 | <b>0.00</b> | -0.54 | 0.22        | 0.40  | 0.37        |
| mi Xelaev18019201m.g | mcm7.L              | -1.37 | <b>0.00</b> | 0.69  | 0.10        | 0.32  | 0.44        |
| mi Xelaev18018358m.g | rhcg.L              | -1.37 | 0.02        | -1.84 | <b>0.00</b> | -0.51 | 0.28        |
| mi Xelaev18026072m.g | mcm8.L              | -1.37 | <b>0.00</b> | 0.29  | 0.50        | 0.38  | 0.39        |
| mi Xelaev18023640m.g | polr3h.L            | -1.37 | <b>0.00</b> | 0.64  | 0.15        | 0.29  | 0.52        |
| mi Xelaev18040478m.g | loc100487362.L      | -1.36 | <b>0.00</b> | 0.44  | 0.33        | -0.39 | 0.38        |
| mi Xelaev18008929m.g | lyar.S              | -1.36 | <b>0.00</b> | 0.61  | 0.15        | 0.40  | 0.35        |
| mi Xelaev18007388m.g | selm.L              | -1.35 | <b>0.00</b> | 0.59  | 0.19        | 0.27  | 0.57        |
| mi Xelaev18024424m.g | cyb5r2.S            | -1.35 | <b>0.00</b> | -0.35 | 0.43        | 0.12  | 0.78        |
| mi Xelaev18018413m.g | aldh1a3-like.L      | -1.35 | <b>0.01</b> | -0.40 | 0.41        | 1.04  | 0.03        |
| mi Xelaev18033448m.g | loc548390-like.S    | -1.35 | <b>0.01</b> | -0.68 | 0.17        | 0.01  | 1.00        |
| mi Xelaev18039466m.g | c14orf1.L           | -1.34 | <b>0.00</b> | 0.34  | 0.44        | 0.20  | 0.65        |
| mi Xelaev18028226m.g | xkr5.L              | -1.34 | <b>0.00</b> | 0.31  | 0.51        | 0.66  | 0.17        |
| mi Xelaev18023542m.g | mcm5.L              | -1.34 | <b>0.00</b> | 0.80  | 0.06        | 0.61  | 0.15        |
| mi Xelaev18017704m.g | creld2.L            | -1.34 | <b>0.00</b> | 1.17  | <b>0.01</b> | 0.51  | 0.24        |
| mi Xelaev18041358m.g | ahsa1.S             | -1.34 | <b>0.00</b> | 0.63  | 0.13        | 0.06  | 0.89        |
| mi Xelaev18031988m.g | spidr.L             | -1.34 | <b>0.00</b> | 0.87  | 0.06        | 0.21  | 0.68        |
| mi Xelaev18038983m.g | loc101732341.L      | -1.34 | <b>0.00</b> | 0.47  | 0.30        | 0.41  | 0.38        |
| mi Xelaev18003271m.g | loc100498108-like.L | -1.33 | 0.02        | -1.32 | <b>0.01</b> | -0.74 | 0.11        |
| mi Xelaev18006123m.g | aptx.L              | -1.33 | <b>0.00</b> | 0.65  | 0.14        | 0.25  | 0.58        |
| mi Xelaev18034826m.g | dnajc9.L            | -1.33 | <b>0.00</b> | 0.64  | 0.13        | 0.14  | 0.75        |
| mi Xelaev18019973m.g | ckap4.S             | -1.33 | <b>0.00</b> | 0.38  | 0.37        | 0.24  | 0.59        |
| mi Xelaev18012297m.g | ppil1.L             | -1.32 | <b>0.00</b> | 0.49  | 0.25        | 0.14  | 0.74        |
| mi Xelaev18026085m.g | prorsd1p.L          | -1.32 | <b>0.00</b> | 0.55  | 0.21        | 0.32  | 0.49        |
| mi Xelaev18013694m.g | ufm1.L              | -1.32 | <b>0.00</b> | 0.52  | 0.23        | 0.38  | 0.37        |
| mi Xelaev18014175m.g | blmh.S              | -1.32 | <b>0.00</b> | 0.55  | 0.19        | 0.01  | 0.98        |
| mi Xelaev18022663m.g | Xetrov90011556m.L   | -1.31 | <b>0.01</b> | 0.61  | 0.19        | 0.35  | 0.49        |
| mi Xelaev18021991m.g | ppp1r32.L           | -1.31 | <b>0.00</b> | 0.57  | 0.19        | 0.57  | 0.19        |
| mi Xelaev18012800m.g | rfc2.L              | -1.31 | <b>0.00</b> | 0.54  | 0.20        | 0.19  | 0.66        |
| mi Xelaev18003623m.g | Xelaev18003623m.g   | -1.31 | <b>0.00</b> | -0.07 | 0.87        | 0.48  | 0.30        |
| mi Xelaev18010174m.g | znf367.S            | -1.30 | <b>0.01</b> | 1.19  | <b>0.01</b> | 0.55  | 0.25        |
| mi Xelaev18045649m.g | Xelaev18045649m.g   | -1.30 | 0.06        | -1.96 | <b>0.00</b> | -0.44 | 0.45        |
| mi Xelaev18004506m.g | hells.S             | -1.30 | <b>0.00</b> | 0.66  | 0.12        | 0.41  | 0.34        |
| mi Xelaev18034855m.g | lrrc20.L            | -1.30 | <b>0.01</b> | 0.79  | 0.08        | 0.20  | 0.67        |
| mi Xelaev18034026m.g | sqle.S              | -1.30 | <b>0.00</b> | 0.03  | 0.95        | 0.24  | 0.57        |

|                      |                   |       |             |       |             |       |             |
|----------------------|-------------------|-------|-------------|-------|-------------|-------|-------------|
| mi Xelaev18035426m.g | hyou1.L           | -1.30 | <b>0.00</b> | 1.02  | 0.02        | 0.21  | 0.62        |
| mi Xelaev18025879m.g | chchd4.S          | -1.29 | <b>0.00</b> | 0.29  | 0.50        | 0.26  | 0.55        |
| mi Xelaev18026651m.g | dhx57.L           | -1.29 | <b>0.00</b> | 0.27  | 0.56        | 0.49  | 0.26        |
| mi Xelaev18039657m.g | wdhd1.L           | -1.29 | <b>0.00</b> | 0.56  | 0.19        | 0.21  | 0.62        |
| mi Xelaev18013274m.g | lcp1.L            | -1.29 | <b>0.00</b> | -1.62 | <b>0.00</b> | -0.36 | 0.39        |
| mi Xelaev18013544m.g | nckap1l.L         | -1.29 | <b>0.01</b> | -1.41 | <b>0.00</b> | -0.44 | 0.32        |
| mi Xelaev18000904m.g | Xelaev18000904m.g | -1.29 | 0.04        | -2.11 | <b>0.00</b> | -0.12 | 0.91        |
| mi Xelaev18019581m.g | eif4a1.L          | -1.29 | <b>0.00</b> | 0.72  | 0.08        | 0.35  | 0.39        |
| mi Xelaev18032784m.g | pomp.S            | -1.28 | <b>0.00</b> | 0.29  | 0.49        | 0.20  | 0.63        |
| mi Xelaev18046056m.g | col1a1.S          | -1.28 | <b>0.00</b> | -0.45 | 0.27        | 0.06  | 0.88        |
| mi Xelaev18006589m.g | haus8.L           | -1.28 | <b>0.00</b> | 0.47  | 0.29        | 0.16  | 0.74        |
| mi Xelaev18017952m.g | Xetrov90008497m.L | -1.28 | <b>0.00</b> | -0.01 | 0.99        | -0.03 | 0.96        |
| mi Xelaev18013628m.g | bcdin3d.L         | -1.28 | <b>0.01</b> | 0.29  | 0.53        | 0.55  | 0.22        |
| mi Xelaev18009381m.g | mad2l1.S          | -1.28 | <b>0.00</b> | 0.43  | 0.32        | 0.09  | 0.84        |
| mi Xelaev18004541m.g | pycard.S          | -1.28 | <b>0.01</b> | -0.02 | 0.96        | 0.35  | 0.44        |
| mi Xelaev18005417m.g | c4orf27.L         | -1.27 | <b>0.00</b> | 0.57  | 0.18        | 0.07  | 0.88        |
| mi Xelaev18043865m.g | ube2c.L           | -1.27 | <b>0.00</b> | -0.51 | 0.24        | 0.10  | 0.82        |
| mi Xelaev18030593m.g | higd1a.L          | -1.27 | <b>0.00</b> | 0.57  | 0.17        | 0.29  | 0.49        |
| mi Xelaev18017944m.g | odf3.L            | -1.27 | <b>0.00</b> | -0.02 | 0.97        | 0.47  | 0.27        |
| mi Xelaev18023014m.g | psma4.L           | -1.27 | <b>0.00</b> | 0.20  | 0.63        | 0.28  | 0.49        |
| mi Xelaev18028391m.g | pbk.L             | -1.26 | <b>0.00</b> | 0.15  | 0.74        | 0.15  | 0.74        |
| mi Xelaev18028048m.g | pdia6.L           | -1.26 | <b>0.00</b> | 0.89  | 0.03        | 0.50  | 0.23        |
| mi Xelaev18018914m.g | Xelaev18018914m.g | -1.26 | 0.11        | -1.84 | <b>0.00</b> | -1.06 | 0.03        |
| mi Xelaev18034677m.g | pprc1-like.L      | -1.26 | <b>0.00</b> | 1.49  | <b>0.00</b> | 0.60  | 0.16        |
| mi Xelaev18028884m.g | acss1.S           | -1.26 | <b>0.00</b> | 0.34  | 0.43        | 0.20  | 0.65        |
| mi Xelaev18015931m.g | Xetrov90006328m.S | -1.26 | <b>0.00</b> | 0.79  | 0.06        | 0.46  | 0.27        |
| mi Xelaev18030705m.g | idi1.L            | -1.26 | <b>0.00</b> | 0.09  | 0.84        | 0.09  | 0.83        |
| mi Xelaev18001058m.g | eif4a1.S          | -1.26 | <b>0.00</b> | 0.96  | 0.02        | 0.31  | 0.46        |
| mi Xelaev18020003m.g | etf1.S            | -1.26 | <b>0.00</b> | 0.64  | 0.12        | 0.28  | 0.50        |
| mi Xelaev18015784m.g | lcp1.S            | -1.25 | <b>0.01</b> | -1.06 | 0.01        | -0.45 | 0.30        |
| mi Xelaev18013690m.g | Xetrov90006631m.L | -1.25 | <b>0.01</b> | 0.08  | 0.88        | 0.31  | 0.53        |
| mi Xelaev18005792m.g | Xelaev18005792m.g | -1.25 | <b>0.00</b> | 0.30  | 0.49        | -0.03 | 0.96        |
| mi Xelaev18016226m.g | mipep.S           | -1.25 | <b>0.01</b> | 0.35  | 0.44        | 0.17  | 0.71        |
| mi Xelaev18020255m.g | aebp1.S           | -1.25 | <b>0.00</b> | -0.58 | 0.18        | 0.37  | 0.39        |
| mi Xelaev18012172m.g | tuba3c.L          | -1.25 | <b>0.00</b> | 0.35  | 0.39        | 0.31  | 0.45        |
| mi Xelaev18047015m.g | loc100497528.S    | -1.25 | <b>0.00</b> | 0.10  | 0.81        | 0.80  | 0.05        |
| mi Xelaev18017233m.g | pole4.L           | -1.25 | <b>0.01</b> | 0.20  | 0.68        | 0.34  | 0.49        |
| mi Xelaev18039428m.g | tim50.L           | -1.25 | <b>0.00</b> | 0.78  | 0.07        | 0.23  | 0.60        |
| mi Xelaev18045037m.g | card11.L          | -1.25 | 0.03        | -1.49 | <b>0.00</b> | -0.45 | 0.32        |
| mi Xelaev18004068m.g | mfsd2a.S          | -1.25 | <b>0.00</b> | 0.35  | 0.42        | 0.30  | 0.48        |
| mi Xelaev18029509m.g | gsta4.S           | -1.24 | 0.07        | -0.43 | 0.46        | -1.76 | <b>0.01</b> |
| mi Xelaev18039483m.g | ahsa1.L           | -1.24 | <b>0.00</b> | 0.40  | 0.34        | 0.08  | 0.85        |
| mi Xelaev18038658m.g | gjb1.L            | -1.24 | <b>0.01</b> | 0.83  | 0.07        | 0.26  | 0.61        |

|                      |                   |       |             |       |             |       |             |
|----------------------|-------------------|-------|-------------|-------|-------------|-------|-------------|
| mi Xelaev18043299m.g | col1a1.L          | -1.24 | <b>0.00</b> | -0.34 | 0.41        | 0.22  | 0.60        |
| mi Xelaev18020297m.g | mat2a.S           | -1.24 | <b>0.00</b> | 0.98  | 0.02        | 0.21  | 0.62        |
| mi Xelaev18032329m.g | dsccl.L           | -1.24 | <b>0.01</b> | 0.37  | 0.42        | 0.07  | 0.89        |
| mi Xelaev18031168m.g | ezh2.L            | -1.24 | <b>0.00</b> | 0.42  | 0.31        | 0.02  | 0.96        |
| mi Xelaev18023992m.g | ruvbl1.L          | -1.24 | <b>0.00</b> | 0.59  | 0.17        | 0.53  | 0.21        |
| mi Xelaev18006316m.g | myo1f.L           | -1.23 | 0.02        | -1.79 | <b>0.00</b> | -0.74 | 0.09        |
| mi Xelaev18029485m.g | prim2.S           | -1.23 | <b>0.01</b> | 0.56  | 0.19        | -0.04 | 0.94        |
| mi Xelaev18016145m.g | ufm1.S            | -1.23 | <b>0.01</b> | 0.36  | 0.41        | 0.00  | 1.00        |
| mi Xelaev18045889m.g | krt12.S           | -1.23 | 0.02        | -1.36 | <b>0.00</b> | -1.86 | <b>0.00</b> |
| mi Xelaev18010549m.g | txnrd2.S          | -1.22 | <b>0.00</b> | 0.18  | 0.68        | -0.18 | 0.67        |
| mi Xelaev18039139m.g | Xelaev18039139m.g | -1.22 | 0.01        | -1.18 | <b>0.01</b> | -1.16 | <b>0.01</b> |
| mi Xelaev18045563m.g | shmt1.L           | -1.22 | <b>0.00</b> | 0.75  | 0.08        | 0.52  | 0.21        |
| mi Xelaev18007339m.g | Xelaev18007339m.g | -1.22 | <b>0.01</b> | 0.57  | 0.21        | 0.03  | 0.96        |
| mi Xelaev18012120m.g | Xelaev18012120m.g | -1.22 | 0.06        | -0.69 | 0.10        | -2.09 | <b>0.00</b> |
| mi Xelaev18023745m.g | rft1.L            | -1.21 | <b>0.01</b> | 0.38  | 0.40        | 0.54  | 0.23        |
| mi Xelaev18007400m.g | mtfp1.L           | -1.21 | <b>0.01</b> | 0.61  | 0.17        | 0.17  | 0.72        |
| mi Xelaev18044318m.g | loc100492872.L    | -1.21 | 0.02        | -1.30 | <b>0.01</b> | -0.93 | 0.03        |
| mi Xelaev18015457m.g | egfl6.S           | -1.21 | <b>0.01</b> | -0.14 | 0.78        | 0.50  | 0.29        |
| mi Xelaev18021625m.g | dnmt1.S           | -1.21 | <b>0.00</b> | 0.74  | 0.08        | 0.44  | 0.29        |
| mi Xelaev18003729m.g | Xelaev18003729m.g | -1.21 | 0.28        | -0.08 | 1.00        | -1.95 | <b>0.00</b> |
| mi Xelaev18006108m.g | chaf1a.L          | -1.21 | <b>0.01</b> | 0.45  | 0.29        | 0.32  | 0.47        |
| mi Xelaev18045869m.g | fkbp10.S          | -1.20 | <b>0.00</b> | 0.22  | 0.60        | 0.60  | 0.15        |
| mi Xelaev18021356m.g | Xelaev18021356m.g | -1.20 | <b>0.00</b> | -0.81 | 0.05        | -1.52 | <b>0.00</b> |
| mi Xelaev18007695m.g | cdc45.L           | -1.20 | <b>0.01</b> | 0.42  | 0.33        | 0.11  | 0.80        |
| mi Xelaev18028880m.g | uqcc2.S           | -1.20 | <b>0.01</b> | 0.46  | 0.29        | 0.04  | 0.95        |
| mi Xelaev18007704m.g | comt.L            | -1.20 | <b>0.00</b> | 0.66  | 0.11        | 0.21  | 0.61        |
| mi Xelaev18028947m.g | tcp1.S            | -1.20 | <b>0.00</b> | 0.55  | 0.19        | 0.20  | 0.63        |
| mi Xelaev18045048m.g | hspe1.L           | -1.20 | <b>0.00</b> | 0.91  | 0.03        | 0.18  | 0.66        |
| mi Xelaev18018941m.g | Xelaev18018941m.g | -1.20 | <b>0.01</b> | 0.23  | 0.62        | 0.02  | 1.00        |
| mi Xelaev18027656m.g | gfm1.L            | -1.19 | <b>0.01</b> | 0.64  | 0.13        | 0.39  | 0.36        |
| mi Xelaev18034050m.g | chrac1.S          | -1.19 | <b>0.01</b> | 0.22  | 0.61        | 0.20  | 0.65        |
| mi Xelaev18040951m.g | fdps.L            | -1.19 | <b>0.00</b> | 0.36  | 0.39        | 0.33  | 0.43        |
| mi Xelaev18012382m.g | mid1ip1.L         | -1.19 | <b>0.00</b> | 0.08  | 0.85        | 0.07  | 0.86        |
| mi Xelaev18010529m.g | sdf2l1.S          | -1.19 | <b>0.01</b> | 0.75  | 0.08        | 0.25  | 0.57        |
| mi Xelaev18012617m.g | ak2.L             | -1.18 | <b>0.01</b> | 0.70  | 0.10        | 0.63  | 0.14        |
| mi Xelaev18003164m.g | loc100496088.1.L  | -1.18 | <b>0.01</b> | -0.14 | 0.75        | 0.41  | 0.35        |
| mi Xelaev18047429m.g | hspe1.S           | -1.18 | <b>0.01</b> | 0.66  | 0.11        | 0.08  | 0.85        |
| mi Xelaev18026526m.g | kiaa1841.L        | -1.18 | <b>0.01</b> | 0.34  | 0.43        | 0.06  | 0.89        |
| mi Xelaev18016770m.g | Xelaev18016770m.g | -1.18 | 0.02        | -1.43 | <b>0.00</b> | -0.54 | 0.22        |
| mi Xelaev18003168m.g | abcf2.L           | -1.18 | <b>0.01</b> | 0.80  | 0.05        | 0.35  | 0.41        |
| mi Xelaev18043144m.g | cdc6.L            | -1.18 | <b>0.01</b> | 1.27  | <b>0.00</b> | 0.29  | 0.52        |
| mi Xelaev18034070m.g | Xelaev18034070m.g | -1.18 | 0.01        | -2.36 | <b>0.00</b> | -1.33 | <b>0.00</b> |
| mi Xelaev18033059m.g | cycc.S            | -1.18 | <b>0.01</b> | 0.34  | 0.41        | 0.02  | 0.97        |



|                      |                   |       |             |       |             |       |             |
|----------------------|-------------------|-------|-------------|-------|-------------|-------|-------------|
| mi Xelaev18029931m.g | hes6.2.S          | -1.17 | <b>0.01</b> | -0.12 | 0.76        | -0.10 | 0.81        |
| mi Xelaev18036193m.g | spib.L            | -1.17 | 0.02        | -1.24 | <b>0.01</b> | -0.82 | 0.06        |
| mi Xelaev18012050m.g | rpa2.L            | -1.17 | <b>0.01</b> | 0.61  | 0.14        | 0.20  | 0.63        |
| mi Xelaev18030833m.g | acbd7.L           | -1.17 | <b>0.01</b> | -0.34 | 0.41        | -0.13 | 0.76        |
| mi Xelaev18033637m.g | usp14.S           | -1.17 | <b>0.01</b> | 0.44  | 0.29        | 0.16  | 0.70        |
| mi Xelaev18038499m.g | ercc6l.L          | -1.17 | <b>0.01</b> | 0.06  | 0.90        | 0.78  | 0.08        |
| mi Xelaev18029506m.g | elovl5.S          | -1.17 | <b>0.01</b> | 0.41  | 0.32        | 0.09  | 0.83        |
| mi Xelaev18047357m.g | wdr12.S           | -1.16 | <b>0.01</b> | 1.00  | 0.02        | 0.65  | 0.13        |
| mi Xelaev18017941m.g | ncaph2.L          | -1.16 | <b>0.01</b> | 0.49  | 0.26        | 0.25  | 0.59        |
| mi Xelaev18030084m.g | pdia6.S           | -1.16 | <b>0.01</b> | 0.74  | 0.08        | 0.41  | 0.33        |
| mi Xelaev18036061m.g | Xelaev18036061m.g | -1.15 | <b>0.01</b> | 0.53  | 0.20        | 0.17  | 0.69        |
| mi Xelaev18011029m.g | rai14.S           | -1.15 | <b>0.01</b> | -0.09 | 0.84        | 0.48  | 0.26        |
| mi Xelaev18007684m.g | sdf2l1.L          | -1.15 | <b>0.01</b> | 0.99  | 0.02        | 0.31  | 0.47        |
| mi Xelaev18007938m.g | adamts19.L        | -1.15 | 0.09        | 0.38  | 0.59        | -1.97 | <b>0.00</b> |
| mi Xelaev18002012m.g | hnrnpdl.S         | -1.15 | <b>0.01</b> | 0.48  | 0.25        | 0.10  | 0.81        |
| mi Xelaev18013378m.g | pmel-like.L       | -1.14 | 0.07        | 0.18  | 0.79        | -1.64 | <b>0.00</b> |
| mi Xelaev18015113m.g | fabp3.S           | -1.14 | <b>0.01</b> | -0.24 | 0.57        | -0.19 | 0.65        |
| mi Xelaev18022815m.g | rarg-like.2.L     | -1.14 | <b>0.01</b> | 0.23  | 0.60        | 0.34  | 0.43        |
| mi Xelaev18016520m.g | rrm1.S            | -1.14 | <b>0.01</b> | 0.64  | 0.12        | 0.20  | 0.63        |
| mi Xelaev18025300m.g | dhcr24.S          | -1.14 | <b>0.01</b> | -0.08 | 0.87        | 0.17  | 0.69        |
| mi Xelaev18021242m.g | lum.S             | -1.13 | <b>0.01</b> | 0.06  | 0.88        | -0.27 | 0.52        |
| mi Xelaev18024334m.g | fads2.S           | -1.13 | <b>0.01</b> | -0.11 | 0.80        | 0.18  | 0.67        |
| mi Xelaev18035637m.g | atad3a.L          | -1.13 | <b>0.01</b> | 0.54  | 0.20        | 0.32  | 0.45        |
| mi Xelaev18032513m.g | tonsl.L           | -1.13 | <b>0.01</b> | 0.41  | 0.35        | 0.39  | 0.37        |
| mi Xelaev18012612m.g | rbbp4.L           | -1.13 | <b>0.01</b> | 0.53  | 0.20        | 0.37  | 0.37        |
| mi Xelaev18009580m.g | uhrf1.S           | -1.12 | <b>0.01</b> | 0.46  | 0.27        | 0.02  | 0.96        |
| mi Xelaev18020359m.g | snrpg.S           | -1.12 | <b>0.01</b> | 0.30  | 0.46        | 0.20  | 0.63        |
| mi Xelaev18039699m.g | hsp90aa1.1.L      | -1.12 | <b>0.01</b> | 0.77  | 0.07        | 0.04  | 0.93        |
| mi Xelaev18007393m.g | pole.L            | -1.12 | <b>0.01</b> | 0.32  | 0.45        | 0.22  | 0.61        |
| mi Xelaev18008321m.g | hmgcs1.L          | -1.12 | <b>0.01</b> | 0.30  | 0.47        | 0.33  | 0.43        |
| mi Xelaev18042357m.g | ppp5c.S           | -1.12 | <b>0.01</b> | 0.49  | 0.24        | 0.18  | 0.67        |
| mi Xelaev18011707m.g | proca1.L          | -1.12 | <b>0.01</b> | -0.13 | 0.75        | 0.39  | 0.35        |
| mi Xelaev18025315m.g | cacybp.S          | -1.12 | <b>0.01</b> | 0.75  | 0.07        | 0.11  | 0.78        |
| mi Xelaev18016836m.g | g3bp1.L           | -1.12 | <b>0.01</b> | 0.68  | 0.10        | 0.22  | 0.59        |
| mi Xelaev18043758m.g | mrpl12.L          | -1.12 | <b>0.01</b> | 0.79  | 0.06        | 0.25  | 0.55        |
| mi Xelaev18005732m.g | h2afz.L           | -1.11 | <b>0.01</b> | 0.22  | 0.60        | 0.22  | 0.59        |
| mi Xelaev18021302m.g | hsp90b1.S         | -1.11 | <b>0.01</b> | 0.98  | 0.02        | 0.18  | 0.67        |
| mi Xelaev18008420m.g | txnl1.L           | -1.11 | <b>0.01</b> | 0.48  | 0.26        | 0.20  | 0.64        |
| mi Xelaev18009793m.g | prtn3.S           | -1.11 | 0.05        | -1.75 | <b>0.00</b> | -0.45 | 0.37        |
| mi Xelaev18039051m.g | ppp5c.L           | -1.11 | <b>0.01</b> | 0.54  | 0.20        | 0.13  | 0.77        |
| mi Xelaev18000122m.g | smarca5.L         | -1.11 | <b>0.01</b> | 0.70  | 0.09        | 0.40  | 0.33        |
| mi Xelaev18047504m.g | rsl1d1.S          | -1.11 | <b>0.01</b> | 0.96  | 0.02        | 0.49  | 0.24        |
| mi Xelaev18045050m.g | hspe1.L           | -1.11 | <b>0.01</b> | 0.95  | 0.02        | 0.18  | 0.67        |

|                      |                     |       |             |       |             |       |             |
|----------------------|---------------------|-------|-------------|-------|-------------|-------|-------------|
| mi Xelaev18014965m.g | Xelaev18014965m.g   | -1.11 | 0.11        | -1.14 | <b>0.01</b> | -1.32 | <b>0.00</b> |
| mi Xelaev18035875m.g | lig1.L              | -1.10 | <b>0.01</b> | 0.36  | 0.40        | 0.20  | 0.64        |
| mi Xelaev18002665m.g | Xelaev18002665m.g   | -1.10 | 0.21        | 0.32  | 0.77        | -2.46 | <b>0.01</b> |
| mi Xelaev18022695m.g | klhdc4.L            | -1.10 | <b>0.01</b> | 0.89  | 0.03        | 0.18  | 0.66        |
| mi Xelaev18024333m.g | loc101732576.S      | -1.10 | <b>0.01</b> | 0.24  | 0.57        | 0.22  | 0.60        |
| mi Xelaev18036299m.g | Xelaev18036299m.g   | -1.10 | 0.24        | -1.56 | <b>0.01</b> | -0.55 | 0.34        |
| mi Xelaev18028769m.g | epcam.S             | -1.10 | 0.24        | -0.89 | 0.08        | -2.41 | <b>0.00</b> |
| mi Xelaev18034577m.g | mki67.L             | -1.10 | <b>0.01</b> | 0.19  | 0.65        | 0.17  | 0.69        |
| mi Xelaev18013125m.g | gpr183.L            | -1.10 | 0.37        | -2.67 | <b>0.00</b> | -0.85 | 0.26        |
| mi Xelaev18047428m.g | hspd1.S             | -1.09 | <b>0.01</b> | 0.96  | 0.02        | 0.11  | 0.79        |
| mi Xelaev18046690m.g | slc16a5-like.S      | -1.09 | 0.44        | -1.96 | <b>0.01</b> | 0.01  | 1.00        |
| mi Xelaev18047252m.g | col6a1.S            | -1.09 | <b>0.01</b> | -1.26 | <b>0.00</b> | 0.61  | 0.14        |
| mi Xelaev18009848m.g | Xelaev18009848m.g   | -1.08 | 0.48        | -1.67 | <b>0.00</b> | -1.60 | 0.01        |
| mi Xelaev18024874m.g | loc100486268-like.S | -1.08 | 0.48        | -2.99 | <b>0.00</b> | -0.71 | 0.59        |
| mi Xelaev18045537m.g | Xelaev18045537m.g   | -1.08 | 0.48        | -1.61 | <b>0.00</b> | -2.15 | <b>0.00</b> |
| mi Xelaev18047254m.g | col6a2.S            | -1.07 | 0.01        | -1.20 | <b>0.00</b> | 0.55  | 0.19        |
| mi Xelaev18040567m.g | Xelaev18040567m.g   | -1.07 | 0.54        | -2.00 | <b>0.00</b> | -0.83 | 0.15        |
| mi Xelaev18003402m.g | Xelaev18003402m.g   | -1.06 | 0.64        | 6.35  | <b>0.00</b> | 0.32  | 1.00        |
| mi Xelaev18020058m.g | csf1r.S             | -1.06 | 0.02        | -1.12 | <b>0.01</b> | -0.92 | 0.03        |
| mi Xelaev18004984m.g | loc734128.L         | -1.04 | 0.64        | -2.32 | <b>0.00</b> | -2.87 | <b>0.00</b> |
| mi Xelaev18019189m.g | unnamed.L           | -1.04 | 0.64        | -6.47 | <b>0.00</b> | -0.91 | 0.21        |
| mi Xelaev18038956m.g | znf185.L            | -1.04 | 0.64        | -2.83 | 0.06        | -2.41 | <b>0.00</b> |
| mi Xelaev18017735m.g | lamb4.L             | -1.04 | 0.64        | 6.49  | <b>0.00</b> | -1.40 | 0.64        |
| mi Xelaev18019671m.g | Xelaev18019671m.g   | -1.03 | 0.19        | -1.80 | <b>0.01</b> | 0.38  | 0.63        |
| mi Xelaev18020340m.g | arhgap25.S          | -1.02 | 0.21        | -2.40 | <b>0.00</b> | -2.31 | <b>0.00</b> |
| mi Xelaev18018366m.g | aen.L               | -1.02 | 0.06        | 1.60  | <b>0.00</b> | -0.02 | 0.97        |
| mi Xelaev18017269m.g | loc100494767.L      | -1.00 | 0.31        | -2.52 | <b>0.01</b> | 0.49  | 0.65        |
| mi Xelaev18020200m.g | dok2.S              | -1.00 | 0.21        | -1.81 | <b>0.01</b> | 0.01  | 1.00        |
| mi Xelaev18011933m.g | ccl5.L              | -0.99 | 0.14        | -1.79 | <b>0.00</b> | -1.64 | <b>0.00</b> |
| mi Xelaev18012141m.g | Xelaev18012141m.g   | -0.98 | 0.24        | -0.61 | 0.15        | -1.71 | <b>0.00</b> |
| mi Xelaev18004184m.g | c1qc.L              | -0.98 | 0.03        | -1.52 | <b>0.00</b> | -1.06 | 0.01        |
| mi Xelaev18028932m.g | loc101735110.S      | -0.97 | 0.48        | -0.80 | 0.19        | -2.07 | <b>0.00</b> |
| mi Xelaev18042429m.g | loc100495183.S      | -0.97 | 0.48        | -1.39 | 0.02        | -1.36 | <b>0.01</b> |
| mi Xelaev18012304m.g | pigr.L              | -0.94 | 0.06        | -2.27 | <b>0.00</b> | -0.35 | 0.41        |
| mi Xelaev18018667m.g | stc1.L              | -0.94 | 0.05        | 0.77  | 0.09        | 1.27  | <b>0.01</b> |
| mi Xelaev18019751m.g | parvg.S             | -0.94 | 0.13        | -1.62 | <b>0.00</b> | -0.03 | 1.00        |
| mi Xelaev18007316m.g | Xetrov90002578m.L   | -0.94 | 0.16        | -2.26 | <b>0.00</b> | -1.59 | <b>0.00</b> |
| mi Xelaev18020840m.g | cttn-like.1.S       | -0.92 | 0.09        | -1.33 | <b>0.01</b> | -0.63 | 0.17        |
| mi Xelaev18040332m.g | crp.4.L             | -0.91 | 0.04        | -1.34 | <b>0.00</b> | -0.89 | 0.03        |
| mi Xelaev18009842m.g | myo1f.S             | -0.91 | 0.09        | -1.39 | <b>0.00</b> | -0.36 | 0.45        |
| mi Xelaev18023671m.g | grap2.L             | -0.90 | 0.40        | -2.85 | <b>0.00</b> | -1.39 | <b>0.01</b> |
| mi Xelaev18018187m.g | rab27a.L            | -0.88 | 0.30        | 0.25  | 0.80        | -2.16 | <b>0.01</b> |
| mi Xelaev18036965m.g | pprc1-like.S        | -0.85 | 0.05        | 1.44  | <b>0.00</b> | 0.74  | 0.09        |

|                      |                   |       |      |       |             |       |             |
|----------------------|-------------------|-------|------|-------|-------------|-------|-------------|
| mi Xelaev18029410m.g | nt5e.S            | -0.84 | 0.48 | -3.52 | <b>0.01</b> | 5.65  | 0.04        |
| mi Xelaev18019546m.g | Xelaev18019546m.g | -0.82 | 0.17 | -1.78 | <b>0.00</b> | -0.49 | 0.31        |
| mi Xelaev18042386m.g | degs3.S           | -0.82 | 0.70 | -0.64 | 0.62        | -2.93 | <b>0.00</b> |
| mi Xelaev18042796m.g | Xelaev18042796m.g | -0.82 | 0.70 | -0.10 | 1.00        | 2.76  | <b>0.00</b> |
| mi Xelaev18041773m.g | MGC75872.S        | -0.80 | 0.30 | -1.63 | <b>0.00</b> | -0.55 | 0.33        |
| mi Xelaev18002190m.g | Xelaev18002190m.g | -0.78 | 0.08 | 0.13  | 0.76        | 2.16  | <b>0.00</b> |
| mi Xelaev18023723m.g | rac2.L            | -0.77 | 0.11 | -1.60 | <b>0.00</b> | -0.41 | 0.35        |
| mi Xelaev18009890m.g | gzmh.S            | -0.77 | 0.43 | -1.69 | <b>0.00</b> | 0.08  | 0.93        |
| mi Xelaev18043055m.g | hck.L             | -0.76 | 0.13 | -1.35 | <b>0.00</b> | -0.65 | 0.16        |
| mi Xelaev18025816m.g | arhgdib.S         | -0.76 | 0.09 | -1.23 | <b>0.00</b> | -0.79 | 0.06        |
| mi Xelaev18045691m.g | phgdh.L           | -0.75 | 0.08 | 1.37  | <b>0.00</b> | 0.20  | 0.64        |
| mi Xelaev18018108m.g | ctsl.L            | -0.74 | 0.13 | -1.77 | <b>0.00</b> | -0.48 | 0.29        |
| mi Xelaev18045688m.g | Xelaev18045688m.g | -0.73 | 0.78 | -3.48 | <b>0.00</b> | -0.40 | 0.61        |
| mi Xelaev18044432m.g | Xelaev18044432m.g | -0.73 | 0.78 | 2.94  | <b>0.01</b> | 0.91  | 0.48        |
| mi Xelaev18025498m.g | ptprc.S           | -0.73 | 0.15 | -1.25 | <b>0.01</b> | -0.04 | 0.95        |
| mi Xelaev18026393m.g | tcte1.L           | -0.73 | 0.11 | 0.62  | 0.17        | 1.43  | <b>0.00</b> |
| mi Xelaev18021926m.g | spi1.L            | -0.72 | 0.12 | -1.51 | <b>0.00</b> | -1.02 | 0.02        |
| mi Xelaev18006520m.g | slc46a2.L         | -0.71 | 0.38 | -1.84 | <b>0.01</b> | -1.20 | 0.04        |
| mi Xelaev18025949m.g | loc100498463.S    | -0.69 | 0.15 | 0.56  | 0.23        | 1.30  | <b>0.01</b> |
| mi Xelaev18036708m.g | lrrc23.S          | -0.67 | 0.19 | 0.28  | 0.58        | 1.39  | <b>0.01</b> |
| mi Xelaev18004183m.g | c1qa.L            | -0.65 | 0.12 | -1.30 | <b>0.00</b> | -0.88 | 0.03        |
| mi Xelaev18038248m.g | Xelaev18038248m.g | -0.64 | 0.18 | -1.20 | <b>0.01</b> | -0.41 | 0.37        |
| mi Xelaev18030527m.g | dhx30.L           | -0.64 | 0.19 | 0.05  | 0.92        | 1.43  | <b>0.00</b> |
| mi Xelaev18011349m.g | Xelaev18011349m.g | -0.61 | 0.52 | -1.81 | <b>0.01</b> | -0.24 | 0.78        |
| mi Xelaev18040797m.g | il6r.L            | -0.61 | 0.32 | -1.80 | <b>0.00</b> | -1.00 | 0.03        |
| mi Xelaev18018905m.g | loc101731348.L    | -0.60 | 0.31 | -1.26 | <b>0.01</b> | -1.10 | 0.01        |
| mi Xelaev18026073m.g | trmt6.L           | -0.58 | 0.19 | 1.18  | <b>0.01</b> | 0.18  | 0.68        |
| mi Xelaev18012140m.g | slc30a2.L         | -0.57 | 0.41 | 1.87  | <b>0.00</b> | -0.31 | 0.58        |
| mi Xelaev18030893m.g | asns.L            | -0.57 | 0.18 | 1.15  | <b>0.01</b> | 0.30  | 0.48        |
| mi Xelaev18039168m.g | Xelaev18039168m.g | -0.55 | 0.30 | -1.69 | <b>0.00</b> | 0.05  | 1.00        |
| mi Xelaev18025712m.g | sh3bp1.S          | -0.53 | 0.46 | -0.24 | 0.71        | -1.43 | <b>0.01</b> |
| mi Xelaev18040509m.g | sh2d2a.L          | -0.52 | 0.62 | -2.40 | <b>0.00</b> | -1.49 | 0.06        |
| mi Xelaev18012079m.g | loc100494491.L    | -0.52 | 0.57 | -0.56 | 0.57        | -6.78 | <b>0.00</b> |
| mi Xelaev18003023m.g | trex2.1           | -0.52 | 0.65 | -2.48 | <b>0.00</b> | -0.26 | 0.69        |
| mi Xelaev18025607m.g | selp.S            | -0.52 | 0.65 | 3.26  | <b>0.00</b> | -0.48 | 1.00        |
| mi Xelaev18037766m.g | cxcr3L.S          | -0.52 | 0.80 | -3.15 | <b>0.00</b> | -1.30 | 0.27        |
| mi Xelaev18012322m.g | loc100492643.L    | -0.52 | 1.00 | -3.63 | <b>0.00</b> | -0.91 | 0.24        |
| mi Xelaev18027954m.g | Xelaev18027954m.g | -0.52 | 1.00 | -3.54 | <b>0.01</b> | -0.89 | 0.54        |
| mi Xelaev18011344m.g | loc100127716.L    | -0.52 | 1.00 | -1.44 | 0.04        | -1.90 | <b>0.01</b> |
| mi Xelaev18030636m.g | loc100497570.L    | -0.52 | 1.00 | -0.84 | 0.14        | -2.02 | <b>0.00</b> |
| mi Xelaev18043533m.g | loc100492690.L    | -0.51 | 1.00 | -2.17 | <b>0.00</b> | -0.54 | 0.45        |
| mi Xelaev18009421m.g | ddit4l.S          | -0.51 | 1.00 | -2.90 | <b>0.01</b> | 0.48  | 1.00        |
| mi Xelaev18016295m.g | krt2l.S           | -0.51 | 1.00 | 2.79  | <b>0.00</b> | -1.30 | 0.09        |

|                      |                     |       |      |       |             |       |             |
|----------------------|---------------------|-------|------|-------|-------------|-------|-------------|
| mi Xelaev18002187m.g | nmral1.S            | -0.51 | 0.24 | 0.32  | 0.44        | 1.76  | <b>0.00</b> |
| mi Xelaev18005736m.g | Xelaev18005736m.g   | -0.50 | 0.40 | 2.15  | <b>0.00</b> | 0.61  | 0.21        |
| mi Xelaev18007075m.g | loc100135349.L      | -0.49 | 1.00 | -7.46 | <b>0.00</b> | 0.00  | 1.00        |
| mi Xelaev18043879m.g | loc100486088.L      | -0.49 | 1.00 | -2.58 | <b>0.00</b> | -1.34 | 0.03        |
| mi Xelaev18029920m.g | otos.S              | -0.49 | 1.00 | 0.53  | 0.68        | -2.09 | <b>0.00</b> |
| mi Xelaev18038657m.g | MGC69466.L          | -0.49 | 1.00 | 6.35  | <b>0.00</b> | 0.99  | 1.00        |
| mi Xelaev18011458m.g | cbr1.L              | -0.47 | 0.28 | -0.25 | 0.57        | 1.39  | <b>0.00</b> |
| mi Xelaev18011935m.g | epx.L               | -0.46 | 0.29 | -1.12 | <b>0.01</b> | -0.64 | 0.15        |
| mi Xelaev18021364m.g | hk2.S               | -0.45 | 0.65 | 0.02  | 1.00        | 2.02  | <b>0.00</b> |
| mi Xelaev18037761m.g | apoe.S              | -0.45 | 0.51 | -2.54 | <b>0.00</b> | -2.08 | <b>0.00</b> |
| mi Xelaev18024536m.g | loc101730972.S      | -0.43 | 0.73 | -1.05 | 0.19        | -2.26 | <b>0.00</b> |
| mi Xelaev18042470m.g | vars.S              | -0.43 | 0.31 | 1.11  | <b>0.01</b> | 0.35  | 0.41        |
| mi Xelaev18011816m.g | loc100489843-like.L | -0.42 | 0.70 | -4.28 | <b>0.00</b> | -0.82 | 0.19        |
| mi Xelaev18012845m.g | Xelaev18012845m.g   | -0.42 | 0.47 | 2.39  | <b>0.00</b> | 1.00  | 0.08        |
| mi Xelaev18016264m.g | mmp13l.S            | -0.41 | 0.43 | 0.45  | 0.31        | 1.37  | <b>0.00</b> |
| mi Xelaev18039707m.g | ankrd9.L            | -0.41 | 0.40 | -1.83 | <b>0.00</b> | 0.65  | 0.19        |
| mi Xelaev18022675m.g | irf8.L              | -0.40 | 0.54 | -1.80 | <b>0.00</b> | -1.01 | 0.03        |
| mi Xelaev18012886m.g | tlr7.L              | -0.40 | 0.59 | -1.64 | <b>0.00</b> | -1.21 | <b>0.01</b> |
| mi Xelaev18020353m.g | anxa4.S             | -0.40 | 0.46 | -1.50 | <b>0.00</b> | -0.83 | 0.06        |
| mi Xelaev18010684m.g | cmklr1.S            | -0.39 | 0.67 | -1.87 | <b>0.00</b> | -1.18 | 0.01        |
| mi Xelaev18000008m.g | bpi.S               | -0.39 | 0.41 | -1.61 | <b>0.00</b> | -1.23 | <b>0.00</b> |
| mi Xelaev18006430m.g | Xelaev18006430m.g   | -0.39 | 0.54 | 0.18  | 0.84        | 1.99  | <b>0.01</b> |
| mi Xelaev18040648m.g | tnfaip8l2.L         | -0.38 | 0.45 | -1.29 | <b>0.01</b> | -0.87 | 0.06        |
| mi Xelaev18012283m.g | csrp1.L             | -0.38 | 0.76 | 1.77  | <b>0.00</b> | 0.19  | 0.77        |
| mi Xelaev18035976m.g | loc100497009.L      | -0.37 | 0.82 | -0.88 | 0.30        | -2.22 | <b>0.00</b> |
| mi Xelaev18033415m.g | f13a1.S             | -0.36 | 0.55 | -1.57 | <b>0.00</b> | -0.39 | 0.44        |
| mi Xelaev18029674m.g | lamp3-like.S        | -0.36 | 0.44 | -1.31 | <b>0.00</b> | -0.66 | 0.12        |
| mi Xelaev18038928m.g | unnamed.L           | -0.36 | 0.52 | -2.56 | <b>0.00</b> | -1.15 | 0.01        |
| mi Xelaev18036988m.g | loc100493999-like.S | -0.35 | 0.51 | -1.69 | <b>0.00</b> | -1.19 | 0.03        |
| mi Xelaev18012406m.g | gpr34.L             | -0.35 | 0.49 | -1.25 | <b>0.01</b> | -1.07 | 0.02        |
| mi Xelaev18032905m.g | loc100494322.S      | -0.35 | 0.61 | -2.24 | <b>0.00</b> | 0.30  | 0.63        |
| mi Xelaev18046887m.g | Xelaev18046887m.g   | -0.35 | 0.66 | -2.96 | <b>0.00</b> | 0.07  | 1.00        |
| mi Xelaev18047607m.g | Xelaev18047607m.g   | -0.35 | 1.00 | 2.75  | <b>0.00</b> | -4.67 | 0.26        |
| mi Xelaev18044138m.g | Xelaev18044138m.g   | -0.34 | 0.56 | -1.00 | 0.04        | -1.55 | <b>0.00</b> |
| mi Xelaev18012049m.g | themis2.L           | -0.33 | 0.86 | -2.33 | <b>0.00</b> | -1.09 | 0.11        |
| mi Xelaev18015387m.g | ncf1.S              | -0.33 | 0.86 | -0.87 | 0.10        | -1.33 | <b>0.00</b> |
| mi Xelaev18012100m.g | sytl1.L             | -0.33 | 1.00 | -1.76 | <b>0.01</b> | -0.24 | 0.84        |
| mi Xelaev18045690m.g | Xelaev18045690m.g   | -0.33 | 1.00 | -4.34 | <b>0.00</b> | -0.19 | 0.85        |
| mi Xelaev18002907m.g | zbtb6.1             | -0.33 | 1.00 | -0.39 | 0.82        | -2.75 | <b>0.01</b> |
| mi Xelaev18021244m.g | epyc.S              | -0.33 | 1.00 | -0.29 | 0.65        | -1.63 | <b>0.00</b> |
| mi Xelaev18042268m.g | unnamed.S           | -0.33 | 0.63 | -1.31 | <b>0.01</b> | -0.73 | 0.11        |
| mi Xelaev18007013m.g | loc100486385.L      | -0.32 | 0.77 | 2.16  | <b>0.00</b> | 0.01  | 1.00        |
| mi Xelaev18002547m.g | Xelaev18002547m.g   | -0.32 | 0.47 | 1.59  | <b>0.00</b> | 0.51  | 0.25        |

|                      |                   |       |      |       |             |       |             |
|----------------------|-------------------|-------|------|-------|-------------|-------|-------------|
| mi Xelaev18027388m.g | col9a1.L          | -0.31 | 0.48 | -0.45 | 0.30        | -1.17 | <b>0.01</b> |
| mi Xelaev18046443m.g | Xelaev18046443m.g | -0.30 | 0.60 | -0.01 | 1.00        | 1.54  | <b>0.00</b> |
| mi Xelaev18039828m.g | Xelaev18039828m.g | -0.30 | 0.84 | 3.02  | <b>0.00</b> | 0.32  | 1.00        |
| mi Xelaev18022482m.g | osgin1.L          | -0.28 | 0.66 | 1.60  | <b>0.01</b> | -0.56 | 0.41        |
| mi Xelaev18011823m.g | mpo.L             | -0.28 | 0.53 | -1.75 | <b>0.00</b> | -0.71 | 0.11        |
| mi Xelaev18045642m.g | loc101733921.L    | -0.27 | 0.63 | -1.45 | <b>0.00</b> | -0.82 | 0.10        |
| mi Xelaev18025588m.g | rgs1.S            | -0.27 | 0.68 | -1.45 | <b>0.01</b> | -0.56 | 0.26        |
| mi Xelaev18030023m.g | ccl34.S           | -0.26 | 0.57 | -0.05 | 0.93        | 2.45  | <b>0.00</b> |
| mi Xelaev18036896m.g | blnk.S            | -0.26 | 1.00 | -3.54 | <b>0.00</b> | -0.45 | 0.54        |
| mi Xelaev18030479m.g | loc100485553.L    | -0.26 | 1.00 | 0.33  | 1.00        | -2.13 | <b>0.00</b> |
| mi Xelaev18038229m.g | fut7.L            | -0.25 | 0.80 | -2.98 | <b>0.00</b> | -1.87 | <b>0.01</b> |
| mi Xelaev18024485m.g | f2.S              | -0.21 | 0.90 | -1.80 | <b>0.00</b> | -0.08 | 0.91        |
| mi Xelaev18046858m.g | Xelaev18046858m.g | -0.20 | 0.68 | 1.60  | <b>0.00</b> | 0.94  | 0.06        |
| mi Xelaev18004385m.g | Xelaev18004385m.g | -0.20 | 1.00 | -1.72 | 0.02        | -2.85 | <b>0.01</b> |
| mi Xelaev18015101m.g | rcc1.S            | -0.19 | 0.69 | 1.31  | <b>0.00</b> | 0.51  | 0.27        |
| mi Xelaev18005016m.g | spon2.L           | -0.17 | 0.73 | 0.09  | 0.85        | 1.53  | <b>0.00</b> |
| mi Xelaev18046293m.g | Xelaev18046293m.g | -0.17 | 0.83 | 0.30  | 0.61        | 1.72  | <b>0.00</b> |
| mi Xelaev18018909m.g | loc100489257.L    | -0.17 | 0.81 | -1.43 | <b>0.00</b> | -0.88 | 0.06        |
| mi Xelaev18040736m.g | Xelaev18040736m.g | -0.17 | 0.74 | -1.31 | <b>0.00</b> | -1.03 | 0.02        |
| mi Xelaev18034327m.g | loc101732585.L    | -0.17 | 1.00 | -3.12 | <b>0.00</b> | -0.47 | 0.46        |
| mi Xelaev18019574m.g | Xelaev18019574m.g | -0.16 | 0.92 | -0.26 | 0.70        | 2.00  | <b>0.00</b> |
| mi Xelaev18045686m.g | itgax.L           | -0.14 | 0.75 | -1.40 | <b>0.00</b> | -1.17 | <b>0.01</b> |
| mi Xelaev18014899m.g | trem2.S           | -0.14 | 0.77 | -1.65 | <b>0.00</b> | -1.41 | <b>0.00</b> |
| mi Xelaev18006478m.g | crlf1.L           | -0.13 | 0.87 | 2.95  | <b>0.00</b> | -0.84 | 1.00        |
| mi Xelaev18040568m.g | Xelaev18040568m.g | -0.13 | 1.00 | -1.11 | 0.39        | -3.26 | <b>0.01</b> |
| mi Xelaev18028195m.g | unnamed.L         | -0.13 | 0.81 | -1.48 | <b>0.00</b> | 0.66  | 0.25        |
| mi Xelaev18019323m.g | Xelaev18019323m.g | -0.11 | 1.00 | -0.78 | 0.28        | 1.87  | <b>0.01</b> |
| mi Xelaev18000322m.g | Xetrov90017301m.1 | -0.11 | 1.00 | 0.31  | 0.85        | 6.52  | <b>0.00</b> |
| mi Xelaev18029617m.g | loc101732807.S    | -0.10 | 0.86 | -1.35 | <b>0.01</b> | -0.37 | 0.43        |
| mi Xelaev18018927m.g | Xelaev18018927m.g | -0.10 | 0.94 | -1.51 | <b>0.00</b> | -0.93 | 0.05        |
| mi Xelaev18017925m.g | lep.L             | -0.10 | 0.83 | 1.99  | <b>0.00</b> | 2.54  | <b>0.00</b> |
| mi Xelaev18026469m.g | otor.L            | -0.09 | 0.91 | -1.44 | <b>0.00</b> | -0.31 | 0.48        |
| mi Xelaev18040078m.g | chac1.L           | -0.09 | 0.84 | 1.17  | <b>0.01</b> | 0.35  | 0.44        |
| mi Xelaev18001309m.g | Xelaev18001309m.g | -0.09 | 1.00 | -1.89 | <b>0.00</b> | -0.13 | 0.91        |
| mi Xelaev18040645m.g | Xelaev18040645m.g | -0.09 | 1.00 | -2.34 | <b>0.01</b> | -1.30 | 0.07        |
| mi Xelaev18017091m.g | loc100492943.L    | -0.08 | 0.94 | -1.96 | <b>0.00</b> | -1.16 | 0.01        |
| mi Xelaev18018912m.g | Xelaev18018912m.g | -0.06 | 1.00 | -2.71 | <b>0.00</b> | -1.01 | 0.10        |
| mi Xelaev18029163m.g | Xetrov90013833m.S | -0.05 | 0.93 | -1.20 | <b>0.01</b> | -0.90 | 0.03        |
| mi Xelaev18031052m.g | Xelaev18031052m.g | -0.04 | 1.00 | 3.33  | <b>0.00</b> | 0.70  | 0.45        |
| mi Xelaev18041824m.g | Xelaev18041824m.g | -0.03 | 1.00 | 0.14  | 0.84        | -1.34 | <b>0.01</b> |
| mi Xelaev18029904m.g | inpp5d.S          | -0.02 | 1.00 | -1.52 | <b>0.00</b> | -0.37 | 0.44        |
| mi Xelaev18010287m.g | loc100495012.S    | -0.02 | 1.00 | -3.73 | <b>0.00</b> | -1.02 | 0.24        |
| mi Xelaev18012950m.g | loc100491382.L    | 0.00  | 1.00 | -1.40 | <b>0.01</b> | -1.22 | 0.01        |

|                      |                   |      |      |       |      |       |      |
|----------------------|-------------------|------|------|-------|------|-------|------|
| mi Xelaev18011155m.g | aqp3.S            | 0.00 | 0.99 | 2.48  | 0.00 | 1.11  | 0.03 |
| mi Xelaev18001974m.g | Xelaev18001974m.g | 0.00 | 1.00 | -1.33 | 0.00 | -0.01 | 1.00 |
| mi Xelaev18002279m.g | Xelaev18002279m.g | 0.00 | 1.00 | -7.48 | 0.00 | 0.00  | 1.00 |
| mi Xelaev18012119m.g | Xetrov90004776m.L | 0.00 | 1.00 | -0.27 | 0.85 | -2.00 | 0.01 |
| mi Xelaev18047968m.g | Xelaev18047968m.g | 0.00 | 1.00 | -0.55 | 0.65 | -3.49 | 0.00 |
| mi Xelaev18014944m.g | elf3.S            | 0.00 | 1.00 | 0.81  | 0.59 | -2.18 | 0.00 |
| mi Xelaev18035501m.g | Xelaev18035501m.g | 0.00 | 1.00 | 3.18  | 1.00 | -6.88 | 0.00 |
| mi Xelaev18002773m.g | Xelaev18002773m.g | 0.00 | 1.00 | 3.91  | 0.00 | 4.89  | 0.14 |
| mi Xelaev18042717m.g | cers2.S           | 0.00 | 1.00 | -0.98 | 0.14 | 2.06  | 0.01 |
| mi Xelaev18036478m.g | loc101735028.L    | 0.01 | 1.00 | -1.09 | 0.39 | -2.89 | 0.00 |
| mi Xelaev18042614m.g | was.S             | 0.02 | 1.00 | -1.26 | 0.01 | -1.22 | 0.01 |
| mi Xelaev18023601m.g | selp.L            | 0.02 | 1.00 | 2.36  | 0.00 | 1.51  | 0.17 |
| mi Xelaev18019679m.g | Xelaev18019679m.g | 0.02 | 1.00 | -0.83 | 0.08 | -1.22 | 0.01 |
| mi Xelaev18024674m.g | Xelaev18024674m.g | 0.03 | 0.96 | 1.34  | 0.01 | 0.70  | 0.18 |
| mi Xelaev18042217m.g | sowahd.S          | 0.05 | 1.00 | -2.28 | 0.00 | -0.75 | 0.27 |
| mi Xelaev18038242m.g | Xelaev18038242m.g | 0.05 | 1.00 | -1.79 | 0.00 | -0.39 | 0.66 |
| mi Xelaev18046526m.g | mmp9.S            | 0.06 | 0.89 | -1.36 | 0.00 | -0.39 | 0.37 |
| mi Xelaev18047462m.g | Xelaev18047462m.g | 0.09 | 0.84 | -2.43 | 0.00 | -0.44 | 0.45 |
| mi Xelaev18046133m.g | ada.S             | 0.10 | 0.93 | -1.77 | 0.00 | -1.60 | 0.00 |
| mi Xelaev18038283m.g | slc2a6.L          | 0.10 | 0.94 | -0.52 | 0.30 | -1.62 | 0.00 |
| mi Xelaev18034351m.g | ptpn6.L           | 0.10 | 0.82 | -1.34 | 0.00 | -0.79 | 0.06 |
| mi Xelaev18026124m.g | epcam.L           | 0.11 | 1.00 | 0.49  | 0.50 | -3.09 | 0.00 |
| mi Xelaev18047323m.g | pttg1ip.1.S       | 0.11 | 0.93 | -2.37 | 0.00 | -1.62 | 0.00 |
| mi Xelaev18040481m.g | Xetrov90022231m.L | 0.12 | 1.00 | -2.13 | 0.09 | -3.32 | 0.01 |
| mi Xelaev18040971m.g | arhgap30.L        | 0.12 | 0.86 | -1.63 | 0.00 | -0.80 | 0.10 |
| mi Xelaev18008130m.g | loc100491157.L    | 0.13 | 1.00 | 0.04  | 1.00 | -2.49 | 0.00 |
| mi Xelaev18012541m.g | loc100216114.L    | 0.14 | 0.86 | -1.75 | 0.01 | -1.48 | 0.01 |
| mi Xelaev18001597m.g | Xelaev18001597m.g | 0.15 | 0.80 | -1.37 | 0.01 | -1.46 | 0.00 |
| mi Xelaev18039831m.g | Xelaev18039831m.g | 0.16 | 0.80 | 2.19  | 0.00 | -1.25 | 0.03 |
| mi Xelaev18009031m.g | corin.S           | 0.18 | 0.91 | -2.06 | 0.00 | -0.10 | 0.86 |
| mi Xelaev18037095m.g | oit3.S            | 0.19 | 0.80 | -2.38 | 0.02 | 4.41  | 0.00 |
| mi Xelaev18043850m.g | tmc8.L            | 0.20 | 1.00 | -2.11 | 0.02 | -2.85 | 0.01 |
| mi Xelaev18025577m.g | apold1.S          | 0.20 | 0.86 | -0.82 | 0.29 | -2.28 | 0.01 |
| mi Xelaev18012028m.g | Xelaev18012028m.g | 0.21 | 0.69 | -1.19 | 0.01 | -0.73 | 0.14 |
| mi Xelaev18035153m.g | loc100493672.L    | 0.22 | 0.80 | -3.00 | 0.00 | -0.94 | 0.08 |
| mi Xelaev18024949m.g | irf8.S            | 0.24 | 0.64 | -1.31 | 0.01 | -0.55 | 0.22 |
| mi Xelaev18043803m.g | c17orf67.L        | 0.24 | 1.00 | -1.19 | 0.05 | -3.31 | 0.00 |
| mi Xelaev18022524m.g | cetp.L            | 0.26 | 0.63 | -1.31 | 0.01 | 0.90  | 0.09 |
| mi Xelaev18006268m.g | misp.L            | 0.26 | 0.64 | -1.31 | 0.01 | -0.25 | 0.77 |
| mi Xelaev18036079m.g | loc733245.L       | 0.27 | 0.73 | -2.15 | 0.00 | -1.27 | 0.02 |
| mi Xelaev18012841m.g | loc100498345.L    | 0.27 | 1.00 | 6.21  | 0.01 | -4.06 | 0.51 |
| mi Xelaev18030549m.g | Xelaev18030549m.g | 0.29 | 0.58 | -1.61 | 0.00 | -0.92 | 0.17 |
| mi Xelaev18019232m.g | Xelaev18019232m.g | 0.29 | 1.00 | -3.27 | 0.00 | -1.73 | 0.01 |

|                      |                   |      |      |       |             |       |             |
|----------------------|-------------------|------|------|-------|-------------|-------|-------------|
| mi Xelaev18045096m.g | Xelaev18045096m.g | 0.29 | 0.51 | -1.19 | <b>0.01</b> | -0.15 | 0.76        |
| mi Xelaev18040753m.g | nr1i3.L           | 0.30 | 0.69 | 2.11  | <b>0.00</b> | -0.82 | 0.18        |
| mi Xelaev18013599m.g | itgb7.L           | 0.30 | 0.86 | -1.99 | <b>0.00</b> | -6.15 | <b>0.01</b> |
| mi Xelaev18002230m.g | Xelaev18002230m.g | 0.32 | 0.72 | -0.12 | 0.84        | 2.10  | <b>0.00</b> |
| mi Xelaev18034835m.g | oit3.L            | 0.32 | 0.48 | 1.16  | 0.01        | 1.27  | <b>0.01</b> |
| mi Xelaev18047336m.g | cd28.S            | 0.32 | 0.73 | -0.91 | 0.10        | -1.44 | <b>0.01</b> |
| mi Xelaev18015722m.g | Xelaev18015722m.g | 0.33 | 0.61 | 2.01  | <b>0.00</b> | 0.42  | 0.46        |
| mi Xelaev18043551m.g | Xetrov90029403m.L | 0.34 | 0.55 | 1.39  | <b>0.01</b> | -0.53 | 0.37        |
| mi Xelaev18002241m.g | Xelaev18002241m.g | 0.34 | 0.42 | -1.64 | <b>0.00</b> | 0.84  | 0.05        |
| mi Xelaev18018616m.g | nt5dc4.L          | 0.34 | 0.45 | -1.36 | <b>0.00</b> | 0.30  | 0.56        |
| mi Xelaev18047455m.g | Xelaev18047455m.g | 0.35 | 0.39 | -1.49 | <b>0.00</b> | 0.11  | 0.82        |
| mi Xelaev18039829m.g | myh8-like.L       | 0.36 | 0.62 | 1.54  | <b>0.00</b> | -1.11 | 0.04        |
| mi Xelaev18013483m.g | Xelaev18013483m.g | 0.39 | 0.62 | -1.65 | <b>0.01</b> | 0.41  | 0.48        |
| mi Xelaev18012851m.g | evi2b.L           | 0.40 | 0.58 | -1.93 | <b>0.00</b> | -0.77 | 0.15        |
| mi Xelaev18010114m.g | Xelaev18010114m.g | 0.41 | 0.73 | 0.33  | 0.70        | -2.46 | <b>0.00</b> |
| mi Xelaev18047463m.g | Xelaev18047463m.g | 0.41 | 0.36 | -2.08 | <b>0.00</b> | -1.00 | 0.11        |
| mi Xelaev18026609m.g | loc100491567.L    | 0.42 | 0.33 | 1.49  | <b>0.00</b> | 0.11  | 0.81        |
| mi Xelaev18035141m.g | loc100491969.L    | 0.42 | 0.51 | -1.01 | 0.07        | 1.88  | <b>0.00</b> |
| mi Xelaev18014009m.g | Xelaev18014009m.g | 0.44 | 0.41 | -1.29 | <b>0.01</b> | -0.16 | 0.81        |
| mi Xelaev18026314m.g | capn1.L           | 0.44 | 1.00 | -2.15 | <b>0.00</b> | -3.04 | <b>0.00</b> |
| mi Xelaev18026634m.g | mall.L            | 0.44 | 1.00 | -0.95 | 0.54        | -2.21 | <b>0.01</b> |
| mi Xelaev18047951m.g | gbp7.S            | 0.44 | 1.00 | -0.94 | 0.70        | -2.18 | <b>0.00</b> |
| mi Xelaev18020541m.g | ttl13.S           | 0.44 | 0.37 | -0.57 | 0.26        | 1.62  | <b>0.00</b> |
| mi Xelaev18047454m.g | Xelaev18047454m.g | 0.44 | 0.30 | -1.61 | <b>0.00</b> | -0.48 | 0.45        |
| mi Xelaev18045098m.g | Xelaev18045098m.g | 0.45 | 0.28 | -1.42 | <b>0.00</b> | -0.25 | 0.54        |
| mi Xelaev18015636m.g | itgb1.S           | 0.45 | 1.00 | 2.63  | <b>0.00</b> | 0.07  | 1.00        |
| mi Xelaev18004858m.g | loc100486585.L    | 0.46 | 0.45 | -1.96 | <b>0.00</b> | -1.21 | <b>0.01</b> |
| mi Xelaev18014832m.g | Xelaev18014832m.g | 0.46 | 0.82 | -0.94 | 0.70        | 6.52  | <b>0.00</b> |
| mi Xelaev18020415m.g | itga11.S          | 0.46 | 0.60 | -0.03 | 1.00        | 2.34  | <b>0.00</b> |
| mi Xelaev18025053m.g | dnase2b.S         | 0.47 | 0.47 | -1.76 | <b>0.00</b> | -1.21 | <b>0.01</b> |
| mi Xelaev18023577m.g | rgs1.L            | 0.47 | 0.35 | -1.53 | <b>0.00</b> | -0.32 | 0.49        |
| mi Xelaev18008128m.g | naip.L            | 0.48 | 0.83 | 0.08  | 1.00        | -1.80 | <b>0.01</b> |
| mi Xelaev18009945m.g | loc101731250.S    | 0.53 | 0.24 | -1.22 | <b>0.01</b> | -1.04 | 0.01        |
| mi Xelaev18032360m.g | fam84b.L          | 0.54 | 0.25 | 0.68  | 0.17        | 1.58  | <b>0.00</b> |
| mi Xelaev18007448m.g | sds.L             | 0.55 | 0.18 | -1.11 | <b>0.01</b> | 0.15  | 0.72        |
| mi Xelaev18047451m.g | hbd.S             | 0.56 | 0.17 | -1.24 | <b>0.00</b> | -0.03 | 0.95        |
| mi Xelaev18006310m.g | acer1.L           | 0.57 | 0.54 | -2.40 | <b>0.00</b> | 0.54  | 0.35        |
| mi Xelaev18013693m.g | frem2.L           | 0.57 | 0.28 | 0.81  | 0.16        | 1.56  | <b>0.00</b> |
| mi Xelaev18019580m.g | loc100496720.L    | 0.57 | 0.17 | -1.23 | <b>0.00</b> | -0.74 | 0.08        |
| mi Xelaev18046765m.g | Xelaev18046765m.g | 0.59 | 0.49 | -1.89 | <b>0.00</b> | -0.14 | 1.00        |
| mi Xelaev18008621m.g | Xelaev18008621m.g | 0.61 | 0.60 | 3.08  | <b>0.00</b> | -0.04 | 1.00        |
| mi Xelaev18037666m.g | loc100494342.S    | 0.61 | 0.34 | -0.53 | 0.28        | -1.58 | <b>0.00</b> |
| mi Xelaev18003937m.g | Xelaev18003937m.g | 0.63 | 0.68 | -2.59 | <b>0.00</b> | -0.87 | 0.16        |

|                      |                     |      |      |       |             |       |             |
|----------------------|---------------------|------|------|-------|-------------|-------|-------------|
| mi Xelaev18014389m.g | cd86.S              | 0.63 | 0.68 | -2.80 | <b>0.00</b> | -1.02 | 0.12        |
| mi Xelaev18034532m.g | Xelaev18034532m.g   | 0.63 | 0.68 | -2.90 | <b>0.01</b> | 0.25  | 1.00        |
| mi Xelaev18013901m.g | ctsc.L              | 0.64 | 0.13 | -1.28 | <b>0.00</b> | -0.44 | 0.29        |
| mi Xelaev18030640m.g | Xetrov90028682m.L   | 0.65 | 0.65 | 2.85  | <b>0.01</b> | -0.91 | 0.21        |
| mi Xelaev18018338m.g | Xetrov90008914m.L   | 0.66 | 0.40 | -2.21 | <b>0.01</b> | -0.23 | 0.84        |
| mi Xelaev18029422m.g | irf6.S              | 0.67 | 0.38 | 2.20  | <b>0.00</b> | -0.65 | 0.35        |
| mi Xelaev18032923m.g | slc39a12.S          | 0.68 | 0.31 | -1.58 | <b>0.01</b> | -0.17 | 0.76        |
| mi Xelaev18006518m.g | loc100487203.L      | 0.68 | 0.62 | -1.83 | 0.02        | -1.78 | <b>0.01</b> |
| mi Xelaev18018928m.g | loc101735287.L      | 0.69 | 0.25 | -1.69 | <b>0.01</b> | -1.12 | 0.05        |
| mi Xelaev18043661m.g | socs3.L             | 0.71 | 0.09 | 0.75  | 0.08        | 1.22  | <b>0.01</b> |
| mi Xelaev18044327m.g | loc101735213.L      | 0.74 | 0.31 | -3.96 | <b>0.00</b> | -0.04 | 1.00        |
| mi Xelaev18004366m.g | Xelaev18004366m.g   | 0.74 | 0.14 | -0.75 | 0.12        | -1.46 | <b>0.00</b> |
| mi Xelaev18028344m.g | loc100494572.L      | 0.76 | 0.38 | 2.07  | 0.04        | 6.96  | <b>0.00</b> |
| mi Xelaev18047036m.g | fev.S               | 0.76 | 0.31 | -2.52 | <b>0.01</b> | -0.11 | 0.89        |
| mi Xelaev18003075m.g | MGC108117.L         | 0.77 | 0.10 | 0.10  | 0.84        | -1.20 | <b>0.01</b> |
| mi Xelaev18037390m.g | tagln.S             | 0.77 | 0.09 | 2.31  | <b>0.00</b> | 0.36  | 0.70        |
| mi Xelaev18019764m.g | Xelaev18019764m.g   | 0.77 | 0.54 | 1.55  | 0.33        | -2.68 | <b>0.00</b> |
| mi Xelaev18009901m.g | pram1.S             | 0.78 | 0.14 | -1.33 | <b>0.01</b> | -0.42 | 0.41        |
| mi Xelaev18036267m.g | btg5.L              | 0.78 | 0.12 | 1.55  | 0.02        | 2.07  | <b>0.00</b> |
| mi Xelaev18012177m.g | Xelaev18012177m.g   | 0.78 | 0.17 | -2.13 | <b>0.00</b> | -0.94 | 0.09        |
| mi Xelaev18043629m.g | tnfrsf6b.L          | 0.78 | 0.35 | 3.56  | <b>0.01</b> | -1.80 | 0.40        |
| mi Xelaev18046900m.g | loc100492872.S      | 0.79 | 0.25 | -2.05 | <b>0.00</b> | 1.08  | 0.06        |
| mi Xelaev18007824m.g | morn3.L             | 0.80 | 0.14 | -1.49 | <b>0.00</b> | 0.44  | 0.41        |
| mi Xelaev18001864m.g | pparg.L             | 0.81 | 0.33 | -2.85 | <b>0.00</b> | 0.59  | 0.43        |
| mi Xelaev18033828m.g | fabp4.S             | 0.81 | 0.15 | -1.31 | 0.01        | 1.53  | <b>0.01</b> |
| mi Xelaev18030909m.g | vwde.L              | 0.83 | 0.13 | -1.33 | <b>0.01</b> | 0.05  | 0.92        |
| mi Xelaev18018863m.g | plekha2.L           | 0.84 | 0.06 | -1.21 | <b>0.01</b> | -0.36 | 0.40        |
| mi Xelaev18003860m.g | Xelaev18003860m.g   | 0.85 | 0.48 | 0.71  | 0.47        | -6.68 | <b>0.00</b> |
| mi Xelaev18045085m.g | hbg2.L              | 0.86 | 0.04 | -1.82 | <b>0.00</b> | -0.06 | 0.88        |
| mi Xelaev18018730m.g | adrb3.L             | 0.86 | 0.08 | -1.29 | <b>0.01</b> | -0.67 | 0.14        |
| mi Xelaev18032381m.g | sla.L               | 0.87 | 0.06 | -1.40 | <b>0.00</b> | -0.88 | 0.05        |
| mi Xelaev18022778m.g | loc100498398.L      | 0.87 | 0.48 | -3.63 | <b>0.00</b> | 1.73  | 0.06        |
| mi Xelaev18023293m.g | frs1.L              | 0.87 | 0.11 | -1.73 | <b>0.00</b> | 0.08  | 1.00        |
| mi Xelaev18009669m.g | ebi3.S              | 0.88 | 0.25 | -1.03 | 0.06        | -1.70 | <b>0.00</b> |
| mi Xelaev18018337m.g | cemip.L             | 0.90 | 0.04 | -1.13 | <b>0.01</b> | 0.23  | 0.59        |
| mi Xelaev18023567m.g | apold1.L            | 0.93 | 0.14 | 0.63  | 0.35        | -1.65 | <b>0.01</b> |
| mi Xelaev18039832m.g | Xelaev18039832m.g   | 0.93 | 1.00 | 2.06  | <b>0.00</b> | 0.11  | 1.00        |
| mi Xelaev18010932m.g | Xelaev18010932m.g   | 0.94 | 0.44 | -6.59 | <b>0.00</b> | -2.59 | 0.09        |
| mi Xelaev18003995m.g | Xelaev18003995m.g   | 0.94 | 0.44 | 6.61  | <b>0.00</b> | -1.47 | 0.19        |
| mi Xelaev18002945m.g | Xelaev18002945m.g   | 0.94 | 0.44 | 1.00  | 0.44        | -3.77 | <b>0.00</b> |
| mi Xelaev18019026m.g | loc100489278-like.L | 1.00 | 0.09 | -1.50 | <b>0.01</b> | -0.44 | 0.40        |
| mi Xelaev18025458m.g | loc100492113.S      | 1.00 | 1.00 | -2.02 | <b>0.01</b> | -1.19 | 0.48        |
| mi Xelaev18043641m.g | Xelaev18043641m.g   | 1.00 | 1.00 | -1.05 | 0.17        | -3.37 | <b>0.00</b> |



|                      |                   |      |             |       |             |       |             |
|----------------------|-------------------|------|-------------|-------|-------------|-------|-------------|
| mi Xelaev18029975m.g | Xelaev18029975m.g | 1.00 | 0.02        | 0.44  | 0.29        | 1.21  | <b>0.00</b> |
| mi Xelaev18017462m.g | epyc.L            | 1.02 | 0.10        | 0.06  | 1.00        | -1.71 | <b>0.00</b> |
| mi Xelaev18047889m.g | eln2.S            | 1.04 | 0.37        | 0.43  | 0.82        | -5.47 | <b>0.00</b> |
| mi Xelaev18027040m.g | tagap.L           | 1.04 | 0.19        | -1.50 | 0.03        | -2.18 | <b>0.00</b> |
| mi Xelaev18015840m.g | prph.S            | 1.07 | <b>0.01</b> | -0.54 | 0.19        | -0.14 | 0.74        |
| mi Xelaev18003264m.g | nppc.L            | 1.08 | <b>0.01</b> | -0.26 | 0.53        | 0.09  | 0.83        |
| mi Xelaev18034566m.g | bnip3.L           | 1.09 | <b>0.01</b> | -0.11 | 0.79        | -0.26 | 0.53        |
| mi Xelaev18034521m.g | htra1.L           | 1.09 | <b>0.01</b> | 0.61  | 0.15        | 0.60  | 0.16        |
| mi Xelaev18002242m.g | Xelaev18002242m.g | 1.10 | 0.04        | -1.74 | <b>0.00</b> | -0.24 | 0.83        |
| mi Xelaev18040563m.g | Xelaev18040563m.g | 1.10 | 0.05        | -1.99 | <b>0.00</b> | -0.06 | 1.00        |
| mi Xelaev18007069m.g | slc7a7.L          | 1.10 | 0.01        | -1.10 | 0.01        | -1.61 | <b>0.00</b> |
| mi Xelaev18038363m.g | stom-like.L       | 1.11 | <b>0.01</b> | -0.16 | 0.70        | -0.06 | 0.89        |
| mi Xelaev18027826m.g | mterf4.L          | 1.11 | <b>0.01</b> | -0.37 | 0.38        | -0.03 | 0.95        |
| mi Xelaev18012516m.g | meaf6.L           | 1.12 | <b>0.01</b> | -0.07 | 0.88        | -0.37 | 0.39        |
| mi Xelaev18005777m.g | ccser1.L          | 1.12 | <b>0.01</b> | -0.17 | 0.68        | -0.24 | 0.57        |
| mi Xelaev18000374m.g | Xelaev18000374m.g | 1.12 | 0.32        | -6.34 | <b>0.00</b> | -1.28 | 0.21        |
| mi Xelaev18043101m.g | hap1.L            | 1.12 | <b>0.01</b> | -0.35 | 0.40        | -0.05 | 0.90        |
| mi Xelaev18019674m.g | gps2.L            | 1.12 | <b>0.01</b> | -0.13 | 0.76        | 0.15  | 0.73        |
| mi Xelaev18044932m.g | dnah7.L           | 1.13 | <b>0.01</b> | -0.56 | 0.18        | 0.21  | 0.61        |
| mi Xelaev18036025m.g | apoc1-like.L      | 1.13 | <b>0.01</b> | -1.12 | <b>0.01</b> | -0.78 | 0.06        |
| mi Xelaev18038290m.g | sardh.L           | 1.13 | <b>0.01</b> | -0.79 | 0.06        | 0.05  | 0.90        |
| mi Xelaev18001086m.g | gps2.S            | 1.13 | <b>0.01</b> | -0.30 | 0.46        | 0.00  | 0.99        |
| mi Xelaev18037809m.g | xilr2.S           | 1.14 | 0.12        | -0.97 | 0.09        | -1.84 | <b>0.00</b> |
| mi Xelaev18033922m.g | klf10.S           | 1.14 | <b>0.01</b> | -0.14 | 0.74        | 0.08  | 0.85        |
| mi Xelaev18012652m.g | loc100490302.L    | 1.14 | <b>0.01</b> | -0.26 | 0.55        | 0.24  | 0.57        |
| mi Xelaev18039412m.g | zfp36.L           | 1.14 | <b>0.01</b> | -0.78 | 0.07        | -0.03 | 0.96        |
| mi Xelaev18041412m.g | slc47a2.S         | 1.14 | <b>0.01</b> | -0.48 | 0.26        | 0.21  | 0.62        |
| mi Xelaev18010477m.g | pik3ip1.S         | 1.14 | <b>0.01</b> | -0.51 | 0.23        | -0.35 | 0.41        |
| mi Xelaev18014018m.g | art5.L            | 1.14 | 0.01        | -1.84 | <b>0.00</b> | -0.91 | 0.03        |
| mi Xelaev18006700m.g | svep1.L           | 1.14 | <b>0.01</b> | 0.05  | 0.91        | 0.12  | 0.77        |
| mi Xelaev18019862m.g | cecr1.S           | 1.15 | <b>0.01</b> | -0.67 | 0.11        | -0.25 | 0.55        |
| mi Xelaev18046783m.g | foxk2.S           | 1.15 | <b>0.01</b> | -0.28 | 0.49        | -0.14 | 0.73        |
| mi Xelaev18019047m.g | Xelaev18019047m.g | 1.15 | 0.12        | -1.70 | <b>0.01</b> | -0.64 | 0.34        |
| mi Xelaev18013275m.g | lrrc63-like.L     | 1.16 | <b>0.01</b> | -0.23 | 0.60        | 0.19  | 0.67        |
| mi Xelaev18042189m.g | loc100485432.S    | 1.16 | 0.21        | 0.71  | 0.47        | -2.81 | <b>0.00</b> |
| mi Xelaev18045318m.g | aldob.L           | 1.16 | <b>0.01</b> | -0.61 | 0.14        | -0.05 | 0.90        |
| mi Xelaev18022884m.g | wdr63.L           | 1.16 | <b>0.01</b> | -0.94 | 0.03        | 0.68  | 0.11        |
| mi Xelaev18006882m.g | klf9.L            | 1.16 | <b>0.01</b> | 0.00  | 1.00        | 0.42  | 0.32        |
| mi Xelaev18032810m.g | wdr86.S           | 1.16 | <b>0.01</b> | -0.21 | 0.64        | 0.57  | 0.20        |
| mi Xelaev18001487m.g | unnamed.L         | 1.16 | <b>0.01</b> | -0.16 | 0.70        | 0.01  | 0.98        |
| mi Xelaev18021845m.g | cd44.L            | 1.17 | <b>0.01</b> | -0.33 | 0.43        | -0.04 | 0.92        |
| mi Xelaev18001657m.g | Xetrov90004318m.1 | 1.17 | <b>0.01</b> | 0.00  | 1.00        | 0.00  | 1.00        |
| mi Xelaev18034594m.g | cyp26a1.L         | 1.17 | 0.06        | -0.42 | 0.64        | 1.70  | <b>0.00</b> |

|                      |                   |      |             |       |             |       |             |
|----------------------|-------------------|------|-------------|-------|-------------|-------|-------------|
| mi Xelaev18005623m.g | cyp2u1.L          | 1.17 | <b>0.01</b> | -0.37 | 0.38        | -0.42 | 0.32        |
| mi Xelaev18038781m.g | smarca1.L         | 1.17 | <b>0.01</b> | -0.29 | 0.50        | -0.34 | 0.43        |
| mi Xelaev18008992m.g | klf3.S            | 1.18 | <b>0.01</b> | -0.03 | 0.97        | 0.03  | 0.98        |
| mi Xelaev18026338m.g | fosl2.L           | 1.18 | <b>0.01</b> | 0.01  | 1.00        | 1.16  | <b>0.01</b> |
| mi Xelaev18007986m.g | cdo1.L            | 1.18 | <b>0.00</b> | -0.88 | 0.03        | -0.30 | 0.47        |
| mi Xelaev18005591m.g | larp1b.L          | 1.18 | <b>0.00</b> | -0.53 | 0.20        | -0.12 | 0.77        |
| mi Xelaev18043400m.g | Xelaev18043400m.g | 1.18 | <b>0.01</b> | -0.51 | 0.23        | 0.06  | 0.90        |
| mi Xelaev18041751m.g | itih6.S           | 1.19 | 0.02        | -1.22 | <b>0.01</b> | 0.28  | 0.55        |
| mi Xelaev18046734m.g | Xelaev18046734m.g | 1.19 | <b>0.00</b> | 0.00  | 1.00        | -0.05 | 0.90        |
| mi Xelaev18011288m.g | loc100490688.L    | 1.19 | <b>0.01</b> | -0.24 | 0.57        | -0.17 | 0.69        |
| mi Xelaev18017444m.g | lrriq1.L          | 1.19 | <b>0.01</b> | -0.45 | 0.30        | 0.02  | 0.98        |
| mi Xelaev18044604m.g | dapl1.L           | 1.19 | <b>0.00</b> | -0.94 | 0.02        | -0.09 | 0.82        |
| mi Xelaev18025448m.g | Xelaev18025448m.g | 1.19 | <b>0.01</b> | 0.27  | 0.56        | 0.29  | 0.54        |
| mi Xelaev18016709m.g | kdm7a.L           | 1.20 | <b>0.00</b> | -0.54 | 0.20        | -0.04 | 0.92        |
| mi Xelaev18045307m.g | Xelaev18045307m.g | 1.20 | 0.04        | 1.77  | <b>0.00</b> | -0.63 | 0.33        |
| mi Xelaev18042589m.g | zfp36.S           | 1.20 | <b>0.00</b> | -0.11 | 0.79        | 0.05  | 0.91        |
| mi Xelaev18004106m.g | caps2.L           | 1.20 | <b>0.01</b> | -0.51 | 0.27        | 0.01  | 1.00        |
| mi Xelaev18028620m.g | adck3.S           | 1.20 | <b>0.00</b> | -0.63 | 0.13        | -0.14 | 0.74        |
| mi Xelaev18016367m.g | prcp.S            | 1.20 | <b>0.00</b> | -0.26 | 0.53        | -0.19 | 0.65        |
| mi Xelaev18031550m.g | kdsr.L            | 1.21 | <b>0.00</b> | -0.22 | 0.59        | -0.10 | 0.81        |
| mi Xelaev18009120m.g | snx25-like.S      | 1.21 | 0.10        | -0.31 | 0.73        | 2.16  | <b>0.01</b> |
| mi Xelaev18037000m.g | loc100493658.S    | 1.21 | <b>0.01</b> | -0.80 | 0.08        | -0.31 | 0.48        |
| mi Xelaev18038146m.g | timp-1.L          | 1.21 | <b>0.00</b> | 1.56  | <b>0.00</b> | 1.21  | <b>0.01</b> |
| mi Xelaev18046174m.g | cebpb.S           | 1.22 | <b>0.01</b> | 0.14  | 0.76        | 0.15  | 0.76        |
| mi Xelaev18027477m.g | bcl6.L            | 1.22 | <b>0.00</b> | -0.20 | 0.64        | 0.22  | 0.60        |
| mi Xelaev18023656m.g | cbx7.L            | 1.22 | <b>0.01</b> | -0.32 | 0.51        | 0.01  | 1.00        |
| mi Xelaev18017111m.g | myot.L            | 1.22 | <b>0.00</b> | 0.20  | 0.63        | -0.40 | 0.34        |
| mi Xelaev18023809m.g | mst1.L            | 1.23 | <b>0.00</b> | 0.29  | 0.49        | 1.11  | <b>0.01</b> |
| mi Xelaev18040399m.g | txnip.L           | 1.23 | <b>0.00</b> | -0.63 | 0.13        | -0.06 | 0.88        |
| mi Xelaev18012717m.g | loc548774.L       | 1.23 | <b>0.01</b> | -0.40 | 0.37        | -0.15 | 0.73        |
| mi Xelaev18031383m.g | dnah5.L           | 1.23 | <b>0.00</b> | -0.45 | 0.28        | 0.19  | 0.65        |
| mi Xelaev18018457m.g | iqch.L            | 1.23 | <b>0.00</b> | -0.49 | 0.25        | 0.30  | 0.48        |
| mi Xelaev18046264m.g | ctsz.S            | 1.24 | <b>0.00</b> | -0.46 | 0.26        | -0.35 | 0.40        |
| mi Xelaev18039809m.g | lrrc9.L           | 1.24 | <b>0.00</b> | -0.47 | 0.27        | 0.01  | 0.99        |
| mi Xelaev18021489m.g | fnip1.S           | 1.24 | <b>0.01</b> | -0.03 | 0.96        | -0.10 | 0.84        |
| mi Xelaev18043673m.g | dcxr.L            | 1.24 | <b>0.00</b> | -0.44 | 0.29        | 0.01  | 0.98        |
| mi Xelaev18001795m.g | loc407755.L       | 1.25 | 0.27        | -2.08 | 0.09        | -2.85 | <b>0.01</b> |
| mi Xelaev18029292m.g | Xelaev18029292m.g | 1.25 | <b>0.01</b> | -0.32 | 0.51        | -0.20 | 0.67        |
| mi Xelaev18017258m.g | stk32a.L          | 1.25 | <b>0.00</b> | -0.38 | 0.37        | -0.42 | 0.32        |
| mi Xelaev18032213m.g | snx31.L           | 1.25 | <b>0.01</b> | -0.28 | 0.54        | -0.11 | 0.84        |
| mi Xelaev18037836m.g | ppp1r15a.S        | 1.26 | <b>0.00</b> | -0.70 | 0.10        | 0.08  | 0.85        |
| mi Xelaev18022000m.g | ifitm1.L          | 1.27 | <b>0.00</b> | -0.56 | 0.19        | -0.55 | 0.19        |
| mi Xelaev18017252m.g | crebrf-like.L     | 1.27 | <b>0.01</b> | -0.62 | 0.19        | 0.10  | 0.83        |

|                      |                   |      |             |       |             |       |      |
|----------------------|-------------------|------|-------------|-------|-------------|-------|------|
| mi Xelaev18017176m.g | loc101731999.L    | 1.27 | <b>0.01</b> | -0.39 | 0.41        | -0.45 | 0.31 |
| mi Xelaev18006345m.g | mkkn2.L           | 1.27 | <b>0.00</b> | -0.29 | 0.49        | 0.00  | 0.99 |
| mi Xelaev18038347m.g | Xelaev18038347m.g | 1.27 | <b>0.00</b> | -0.88 | 0.04        | 0.97  | 0.02 |
| mi Xelaev18046379m.g | loc100496782.S    | 1.27 | <b>0.00</b> | -0.80 | 0.07        | 0.15  | 0.73 |
| mi Xelaev18042722m.g | ctss.S            | 1.27 | <b>0.00</b> | -0.57 | 0.17        | -0.76 | 0.07 |
| mi Xelaev18030882m.g | pdk4.L            | 1.27 | <b>0.00</b> | -0.46 | 0.26        | 0.18  | 0.67 |
| mi Xelaev18041279m.g | atg2b.S           | 1.28 | <b>0.00</b> | -0.31 | 0.45        | -0.02 | 0.95 |
| mi Xelaev18022531m.g | Xelaev18022531m.g | 1.28 | <b>0.00</b> | -0.17 | 0.67        | -0.25 | 0.55 |
| mi Xelaev18038035m.g | tyrobp.S          | 1.28 | 0.02        | -1.55 | <b>0.00</b> | -0.40 | 0.39 |
| mi Xelaev18043867m.g | tnnc2.L           | 1.28 | 0.02        | 1.97  | <b>0.00</b> | -0.13 | 0.82 |
| mi Xelaev18045304m.g | Xelaev18045304m.g | 1.28 | 0.33        | 6.92  | <b>0.00</b> | 0.83  | 1.00 |
| mi Xelaev18032679m.g | loc733184.S       | 1.28 | <b>0.00</b> | -0.43 | 0.33        | 0.21  | 0.62 |
| mi Xelaev18040619m.g | Xelaev18040619m.g | 1.29 | <b>0.01</b> | 0.22  | 0.65        | -0.62 | 0.17 |
| mi Xelaev18000342m.g | Xelaev18000342m.g | 1.29 | 0.10        | -1.54 | <b>0.00</b> | 1.22  | 0.11 |
| mi Xelaev18032161m.g | cpne3.L           | 1.29 | <b>0.00</b> | -0.47 | 0.26        | -0.02 | 0.97 |
| mi Xelaev18027995m.g | fbxo25.L          | 1.29 | <b>0.00</b> | -0.21 | 0.62        | -0.20 | 0.64 |
| mi Xelaev18019135m.g | loc101733102.L    | 1.29 | 0.24        | 3.45  | <b>0.01</b> | 0.72  | 0.55 |
| mi Xelaev18027237m.g | lin28b.L          | 1.29 | <b>0.00</b> | -0.23 | 0.62        | -0.11 | 0.82 |
| mi Xelaev18040384m.g | Xelaev18040384m.g | 1.30 | <b>0.00</b> | -0.66 | 0.12        | -0.16 | 0.71 |
| mi Xelaev18007577m.g | pik3ip1.L         | 1.30 | <b>0.00</b> | -0.77 | 0.07        | -0.34 | 0.41 |
| mi Xelaev18008362m.g | ranbp3l-like.L    | 1.30 | <b>0.00</b> | -0.02 | 0.97        | 0.25  | 0.57 |
| mi Xelaev18039910m.g | sptb.L            | 1.30 | <b>0.01</b> | -1.21 | <b>0.01</b> | 0.03  | 0.96 |
| mi Xelaev18037048m.g | cpn1.S            | 1.31 | 0.07        | -1.71 | <b>0.00</b> | -0.37 | 0.56 |
| mi Xelaev18023478m.g | Xelaev18023478m.g | 1.31 | <b>0.00</b> | 0.59  | 0.18        | 0.20  | 0.66 |
| mi Xelaev18003184m.g | loc100485662.1.L  | 1.31 | <b>0.00</b> | -0.42 | 0.32        | -0.07 | 0.86 |
| mi Xelaev18038577m.g | renbp.L           | 1.31 | <b>0.00</b> | -0.37 | 0.37        | -0.29 | 0.48 |
| mi Xelaev18047609m.g | Xelaev18047609m.g | 1.31 | 0.03        | 1.54  | <b>0.00</b> | -0.71 | 0.16 |
| mi Xelaev18013408m.g | rdh7.L            | 1.31 | <b>0.00</b> | -0.39 | 0.37        | 0.34  | 0.44 |
| mi Xelaev18045016m.g | ankar.L           | 1.31 | <b>0.01</b> | -0.56 | 0.29        | 0.73  | 0.15 |
| mi Xelaev18039999m.g | actc1.L           | 1.32 | <b>0.00</b> | 0.40  | 0.37        | -0.11 | 0.81 |
| mi Xelaev18032762m.g | wnt9a.S           | 1.32 | <b>0.01</b> | 0.08  | 0.95        | -0.39 | 0.45 |
| mi Xelaev18014029m.g | prcp.L            | 1.33 | <b>0.00</b> | -0.63 | 0.14        | -0.48 | 0.26 |
| mi Xelaev18043284m.g | slc4a1.L          | 1.33 | <b>0.00</b> | -0.80 | 0.08        | -0.50 | 0.32 |
| mi Xelaev18031061m.g | nek10.L           | 1.33 | <b>0.01</b> | -0.05 | 0.93        | 0.08  | 0.92 |
| mi Xelaev18018391m.g | arrdc4.L          | 1.33 | <b>0.00</b> | -0.77 | 0.08        | -0.34 | 0.44 |
| mi Xelaev18039402m.g | nccrp1.L          | 1.34 | <b>0.00</b> | -0.10 | 0.84        | 0.02  | 1.00 |
| mi Xelaev18039849m.g | lgals3.L          | 1.34 | <b>0.00</b> | 0.32  | 0.49        | -0.26 | 0.56 |
| mi Xelaev18043510m.g | loc101731830.L    | 1.34 | <b>0.01</b> | -0.16 | 0.77        | 0.14  | 0.78 |
| mi Xelaev18022474m.g | Xelaev18022474m.g | 1.34 | <b>0.00</b> | -0.13 | 0.81        | -0.41 | 0.36 |
| mi Xelaev18023681m.g | tef.L             | 1.34 | <b>0.00</b> | 0.00  | 1.00        | -0.19 | 0.66 |
| mi Xelaev18038813m.g | lhfp1.L           | 1.34 | <b>0.00</b> | 0.10  | 0.81        | -0.16 | 0.73 |
| mi Xelaev18036758m.g | acta2.S           | 1.34 | <b>0.00</b> | -0.51 | 0.24        | 0.82  | 0.08 |
| mi Xelaev18015277m.g | Xelaev18015277m.g | 1.35 | <b>0.01</b> | -0.10 | 0.90        | -0.12 | 0.80 |

|                      |                     |      |             |       |             |       |             |
|----------------------|---------------------|------|-------------|-------|-------------|-------|-------------|
| mi Xelaev18038046m.g | Xelaev18038046m.g   | 1.35 | <b>0.01</b> | -0.35 | 0.49        | 0.25  | 0.66        |
| mi Xelaev18005527m.g | hhip.L              | 1.35 | <b>0.00</b> | -0.49 | 0.24        | -0.23 | 0.58        |
| mi Xelaev18046523m.g | loc100494738.S      | 1.36 | 0.13        | 3.24  | <b>0.00</b> | -0.24 | 0.84        |
| mi Xelaev18009396m.g | npnt.S              | 1.36 | <b>0.00</b> | -0.14 | 0.77        | 0.48  | 0.27        |
| mi Xelaev18042598m.g | gata1.S             | 1.37 | <b>0.01</b> | -0.50 | 0.30        | -0.26 | 0.82        |
| mi Xelaev18047856m.g | mylpf.S             | 1.38 | <b>0.01</b> | 0.83  | 0.08        | -0.50 | 0.30        |
| mi Xelaev18028179m.g | loc100490476.L      | 1.38 | <b>0.00</b> | -1.14 | 0.01        | -0.16 | 0.73        |
| mi Xelaev18020076m.g | Xelaev18020076m.g   | 1.39 | <b>0.01</b> | 0.06  | 1.00        | -0.83 | 0.15        |
| mi Xelaev18016717m.g | loc100488229.L      | 1.39 | <b>0.00</b> | 0.37  | 0.41        | 0.37  | 0.42        |
| mi Xelaev18038251m.g | Xelaev18038251m.g   | 1.39 | 0.02        | 1.20  | 0.16        | 6.23  | <b>0.01</b> |
| mi Xelaev18045645m.g | mylpf.L             | 1.39 | <b>0.01</b> | 0.91  | 0.05        | -0.60 | 0.20        |
| mi Xelaev18011171m.g | vwa5a-like.S        | 1.39 | <b>0.00</b> | -0.33 | 0.43        | 0.04  | 0.93        |
| mi Xelaev18044099m.g | Xelaev18044099m.g   | 1.39 | <b>0.00</b> | -0.12 | 0.77        | 0.13  | 0.76        |
| mi Xelaev18022528m.g | Xelaev18022528m.g   | 1.39 | <b>0.00</b> | 0.48  | 0.25        | -0.19 | 0.64        |
| mi Xelaev18011324m.g | creg1.L             | 1.40 | <b>0.00</b> | -1.02 | 0.02        | -0.13 | 0.77        |
| mi Xelaev18018854m.g | loc100490587.L      | 1.40 | 0.22        | -2.14 | <b>0.01</b> | -0.24 | 1.00        |
| mi Xelaev18000380m.g | Xelaev18000380m.g   | 1.40 | <b>0.00</b> | -0.06 | 0.94        | 0.50  | 0.27        |
| mi Xelaev18006949m.g | ctsv.L              | 1.40 | <b>0.00</b> | -0.67 | 0.10        | 0.05  | 0.90        |
| mi Xelaev18007970m.g | lox.L               | 1.40 | <b>0.00</b> | 0.25  | 0.56        | 0.15  | 0.73        |
| mi Xelaev18032678m.g | Xelaev18032678m.g   | 1.40 | <b>0.01</b> | -0.68 | 0.18        | 0.39  | 0.40        |
| mi Xelaev18005528m.g | Xetrov90000949m.L   | 1.40 | <b>0.00</b> | -0.20 | 0.66        | -0.34 | 0.43        |
| mi Xelaev18035724m.g | loc101730276.L      | 1.40 | <b>0.01</b> | -1.21 | 0.03        | -0.80 | 0.11        |
| mi Xelaev18043994m.g | tlhc2.L             | 1.41 | 0.48        | -2.33 | <b>0.00</b> | -0.91 | 0.24        |
| mi Xelaev18010639m.g | rhof.S              | 1.41 | 0.48        | 3.45  | <b>0.01</b> | -2.18 | 0.06        |
| mi Xelaev18042112m.g | Xelaev18042112m.g   | 1.41 | <b>0.00</b> | -0.14 | 0.74        | 0.18  | 0.69        |
| mi Xelaev18019317m.g | loc100494987-like.L | 1.41 | <b>0.00</b> | -0.30 | 0.51        | -0.07 | 0.87        |
| mi Xelaev18021438m.g | Xelaev18021438m.g   | 1.41 | <b>0.00</b> | -0.42 | 0.34        | -0.02 | 0.97        |
| mi Xelaev18010384m.g | sds.S               | 1.41 | <b>0.00</b> | -1.23 | <b>0.00</b> | -0.09 | 0.84        |
| mi Xelaev18047615m.g | rsph10b.S           | 1.41 | <b>0.00</b> | -0.65 | 0.14        | 0.29  | 0.50        |
| mi Xelaev18013332m.g | prph.L              | 1.41 | <b>0.00</b> | -0.13 | 0.74        | 0.08  | 0.85        |
| mi Xelaev18016494m.g | Xelaev18016494m.g   | 1.42 | <b>0.00</b> | -0.49 | 0.24        | 0.02  | 0.97        |
| mi Xelaev18025951m.g | cidec.S             | 1.42 | <b>0.00</b> | -0.61 | 0.17        | -0.13 | 0.78        |
| mi Xelaev18042946m.g | srms.S              | 1.42 | <b>0.00</b> | -0.53 | 0.21        | 0.20  | 0.64        |
| mi Xelaev18033400m.g | loc100488932.S      | 1.43 | 0.22        | 1.21  | 0.39        | -2.64 | <b>0.00</b> |
| mi Xelaev18029914m.g | klhl24.S            | 1.43 | <b>0.00</b> | -0.73 | 0.10        | -0.22 | 0.62        |
| mi Xelaev18032260m.g | klf10.L             | 1.43 | <b>0.00</b> | -0.17 | 0.69        | 0.00  | 1.00        |
| mi Xelaev18009386m.g | sgms2.S             | 1.44 | <b>0.01</b> | -0.56 | 0.28        | 0.88  | 0.11        |
| mi Xelaev18031046m.g | nr1d2.L             | 1.44 | <b>0.00</b> | 0.26  | 0.57        | -0.61 | 0.18        |
| mi Xelaev18007471m.g | ube3b.L             | 1.45 | <b>0.00</b> | -0.68 | 0.16        | 0.44  | 0.34        |
| mi Xelaev18034344m.g | c1s.L               | 1.45 | <b>0.00</b> | 0.61  | 0.17        | 0.28  | 0.53        |
| mi Xelaev18047510m.g | myh11.S             | 1.45 | <b>0.00</b> | -0.01 | 1.00        | -0.42 | 0.39        |
| mi Xelaev18005035m.g | loc100492954.L      | 1.45 | <b>0.00</b> | 0.16  | 0.74        | -0.74 | 0.10        |
| mi Xelaev18043832m.g | Xelaev18043832m.g   | 1.45 | <b>0.00</b> | -0.59 | 0.15        | 0.14  | 0.73        |

|                      |                     |      |             |       |             |       |             |
|----------------------|---------------------|------|-------------|-------|-------------|-------|-------------|
| mi Xelaev18045100m.g | Xelaev18045100m.g   | 1.46 | 0.04        | -2.10 | <b>0.00</b> | 0.99  | 1.00        |
| mi Xelaev18010386m.g | slc8b1.S            | 1.46 | <b>0.00</b> | -0.53 | 0.28        | -0.39 | 0.43        |
| mi Xelaev18036115m.g | ppp1r15a.L          | 1.46 | <b>0.00</b> | -0.75 | 0.08        | -0.22 | 0.61        |
| mi Xelaev18017962m.g | loc100498358.L      | 1.47 | <b>0.01</b> | 0.52  | 0.33        | -0.02 | 1.00        |
| mi Xelaev18043345m.g | march10.L           | 1.47 | <b>0.00</b> | -0.08 | 0.90        | 0.37  | 0.49        |
| mi Xelaev18011164m.g | ccl19.S             | 1.47 | <b>0.00</b> | 1.15  | 0.05        | 1.07  | 0.21        |
| mi Xelaev18022532m.g | Xetrov90011361m.L   | 1.47 | <b>0.00</b> | 1.30  | <b>0.00</b> | -0.25 | 0.60        |
| mi Xelaev18023481m.g | Xelaev18023481m.g   | 1.47 | <b>0.00</b> | 0.91  | 0.03        | 0.44  | 0.29        |
| mi Xelaev18034005m.g | trib1.S             | 1.47 | <b>0.00</b> | 0.68  | 0.17        | 0.13  | 0.82        |
| mi Xelaev18025655m.g | cbx7.S              | 1.47 | <b>0.00</b> | -0.04 | 0.94        | 0.08  | 0.87        |
| mi Xelaev18007501m.g | hps4.L              | 1.47 | <b>0.00</b> | 0.05  | 0.91        | -0.18 | 0.69        |
| mi Xelaev18021194m.g | gns.S               | 1.49 | <b>0.00</b> | -0.26 | 0.53        | 0.32  | 0.44        |
| mi Xelaev18008260m.g | loc100496633-like.L | 1.49 | <b>0.00</b> | -0.34 | 0.48        | 0.10  | 0.84        |
| mi Xelaev18029762m.g | ptx3.S              | 1.49 | <b>0.00</b> | -0.85 | 0.08        | -0.19 | 0.71        |
| mi Xelaev18015701m.g | ednrb.S             | 1.50 | <b>0.01</b> | 0.04  | 1.00        | 0.43  | 0.45        |
| mi Xelaev18031468m.g | fam134b.L           | 1.50 | <b>0.00</b> | -0.66 | 0.12        | -0.21 | 0.61        |
| mi Xelaev18022274m.g | fosl1.L             | 1.50 | <b>0.00</b> | 1.50  | <b>0.01</b> | 0.81  | 0.40        |
| mi Xelaev18028160m.g | clic4.L             | 1.51 | 0.01        | -1.58 | <b>0.00</b> | -0.50 | 0.65        |
| mi Xelaev18034029m.g | sla.S               | 1.51 | <b>0.00</b> | -1.53 | <b>0.00</b> | -0.93 | 0.03        |
| mi Xelaev18045087m.g | loc100485964-like.L | 1.51 | <b>0.00</b> | 0.11  | 0.83        | 0.23  | 0.61        |
| mi Xelaev18032617m.g | loc100491922-like.S | 1.51 | <b>0.01</b> | -0.74 | 0.13        | -0.65 | 0.17        |
| mi Xelaev18016664m.g | Xetrov90026715m.L   | 1.51 | <b>0.00</b> | 0.50  | 0.25        | 0.74  | 0.09        |
| mi Xelaev18018420m.g | pcsk6.L             | 1.52 | <b>0.00</b> | -0.14 | 0.74        | 0.38  | 0.37        |
| mi Xelaev18045301m.g | Xelaev18045301m.g   | 1.52 | <b>0.01</b> | 1.31  | <b>0.01</b> | -0.34 | 0.50        |
| mi Xelaev18027773m.g | loc100145763.L      | 1.52 | <b>0.00</b> | -0.29 | 0.49        | -0.14 | 0.75        |
| mi Xelaev18027530m.g | cpn2.L              | 1.53 | <b>0.01</b> | -2.09 | <b>0.00</b> | 1.34  | 0.13        |
| mi Xelaev18009128m.g | casp3.S             | 1.53 | <b>0.00</b> | -0.24 | 0.58        | -0.35 | 0.42        |
| mi Xelaev18043110m.g | krt19.L             | 1.54 | <b>0.00</b> | -0.28 | 0.49        | 0.19  | 0.65        |
| mi Xelaev18032342m.g | fbxo32.L            | 1.55 | <b>0.00</b> | -0.03 | 1.00        | -0.29 | 0.55        |
| mi Xelaev18044792m.g | Xetrov90024114m.L   | 1.55 | <b>0.00</b> | -0.38 | 0.39        | -0.09 | 0.84        |
| mi Xelaev18042743m.g | txnip.S             | 1.56 | <b>0.00</b> | -0.63 | 0.13        | 0.04  | 0.91        |
| mi Xelaev18016908m.g | loc100491991-like.L | 1.56 | <b>0.00</b> | -2.35 | <b>0.00</b> | -1.37 | <b>0.00</b> |
| mi Xelaev18002528m.g | crebl2.L            | 1.56 | <b>0.00</b> | -0.61 | 0.15        | -0.48 | 0.26        |
| mi Xelaev18036380m.g | Xetrov90013771m.L   | 1.57 | <b>0.00</b> | -0.01 | 1.00        | 0.23  | 0.63        |
| mi Xelaev18004051m.g | azin2.S             | 1.57 | <b>0.00</b> | 0.20  | 0.64        | -0.11 | 0.79        |
| mi Xelaev18027866m.g | klhl24.L            | 1.58 | <b>0.00</b> | -0.45 | 0.29        | -0.34 | 0.42        |
| mi Xelaev18023934m.g | irak2.L             | 1.58 | <b>0.00</b> | -0.91 | 0.04        | -0.59 | 0.18        |
| mi Xelaev18022676m.g | dusp22a.L           | 1.59 | <b>0.00</b> | -0.53 | 0.30        | -0.13 | 0.81        |
| mi Xelaev18020523m.g | cemip.S             | 1.59 | <b>0.00</b> | -0.73 | 0.10        | 0.55  | 0.21        |
| mi Xelaev18020469m.g | arrdc4.S            | 1.59 | <b>0.00</b> | -0.71 | 0.10        | -0.28 | 0.53        |
| mi Xelaev18011859m.g | Xetrov90028149m.L   | 1.59 | 0.03        | 6.42  | <b>0.00</b> | 0.48  | 0.52        |
| mi Xelaev18007618m.g | Xelaev18007618m.g   | 1.60 | <b>0.00</b> | 0.50  | 0.24        | -0.34 | 0.44        |
| mi Xelaev18034956m.g | glud1.L             | 1.60 | <b>0.00</b> | -0.50 | 0.23        | -0.26 | 0.53        |

|                      |                     |      |             |       |             |       |             |
|----------------------|---------------------|------|-------------|-------|-------------|-------|-------------|
| mi Xelaev18017179m.g | Xelaev18017179m.g   | 1.60 | <b>0.00</b> | -0.14 | 0.78        | -0.53 | 0.25        |
| mi Xelaev18038157m.g | loc100488699-like.L | 1.61 | <b>0.00</b> | 0.44  | 0.34        | -0.08 | 0.90        |
| mi Xelaev18023824m.g | mst1r.L             | 1.62 | <b>0.00</b> | -0.42 | 0.48        | 0.40  | 0.51        |
| mi Xelaev18006177m.g | tex15.L             | 1.62 | <b>0.00</b> | -0.49 | 0.32        | -0.16 | 0.76        |
| mi Xelaev18019543m.g | asgr2.L             | 1.63 | <b>0.00</b> | 0.65  | 0.34        | 0.25  | 0.90        |
| mi Xelaev18013717m.g | kl.L                | 1.63 | <b>0.00</b> | 0.24  | 0.74        | -0.33 | 0.53        |
| mi Xelaev18016451m.g | Xelaev18016451m.g   | 1.64 | <b>0.00</b> | -0.99 | 0.02        | 0.19  | 0.64        |
| mi Xelaev18015543m.g | lyg2.S              | 1.64 | <b>0.00</b> | 1.20  | <b>0.00</b> | 0.59  | 0.17        |
| mi Xelaev18019549m.g | Xelaev18019549m.g   | 1.65 | <b>0.01</b> | -1.52 | <b>0.00</b> | -1.08 | 0.03        |
| mi Xelaev18017672m.g | asb15.L             | 1.66 | <b>0.00</b> | -1.07 | 0.04        | -0.58 | 0.26        |
| mi Xelaev18044199m.g | loc100493941-like.L | 1.66 | <b>0.00</b> | -0.49 | 0.40        | -0.67 | 0.35        |
| mi Xelaev18008195m.g | bhmt.L              | 1.67 | <b>0.00</b> | -0.55 | 0.24        | 0.54  | 0.27        |
| mi Xelaev18021871m.g | loc100497319-like.L | 1.67 | 0.06        | -2.33 | <b>0.00</b> | -0.53 | 0.33        |
| mi Xelaev18014552m.g | Xelaev18014552m.g   | 1.67 | <b>0.00</b> | -0.33 | 0.58        | -0.26 | 0.73        |
| mi Xelaev18035721m.g | loc100490200.L      | 1.67 | <b>0.00</b> | -0.57 | 0.21        | -0.56 | 0.21        |
| mi Xelaev18047342m.g | loc100495429.S      | 1.68 | <b>0.00</b> | 0.37  | 0.51        | 0.32  | 0.49        |
| mi Xelaev18033990m.g | fbxo32.S            | 1.68 | <b>0.00</b> | -0.42 | 0.35        | -0.25 | 0.57        |
| mi Xelaev18039392m.g | loc100486294.L      | 1.68 | <b>0.00</b> | -0.84 | 0.12        | 0.37  | 0.49        |
| mi Xelaev18006954m.g | Xelaev18006954m.g   | 1.68 | <b>0.01</b> | -0.22 | 0.71        | 0.13  | 0.85        |
| mi Xelaev18008304m.g | itga2.L             | 1.69 | <b>0.00</b> | 0.79  | 0.09        | 0.42  | 0.39        |
| mi Xelaev18002612m.g | Xelaev18002612m.g   | 1.69 | <b>0.00</b> | -0.66 | 0.18        | -0.10 | 0.87        |
| mi Xelaev18020777m.g | stra6.S             | 1.70 | <b>0.01</b> | -0.92 | 0.15        | 0.16  | 0.81        |
| mi Xelaev18040562m.g | loc100488729.L      | 1.70 | 0.06        | -1.95 | 0.02        | -1.79 | <b>0.00</b> |
| mi Xelaev18026662m.g | cyp1b1.L            | 1.72 | <b>0.00</b> | -0.15 | 0.77        | 0.03  | 0.95        |
| mi Xelaev18031303m.g | loc100489129.L      | 1.72 | 0.33        | 2.19  | <b>0.00</b> | -1.19 | 0.07        |
| mi Xelaev18019125m.g | crb3.L              | 1.72 | <b>0.01</b> | -0.06 | 1.00        | -0.68 | 0.26        |
| mi Xelaev18021479m.g | rad50.S             | 1.73 | <b>0.01</b> | -0.08 | 0.93        | -1.59 | 0.02        |
| mi Xelaev18011812m.g | cldn3.L             | 1.73 | <b>0.00</b> | 0.34  | 0.70        | 0.75  | 0.20        |
| mi Xelaev18044524m.g | slc11a1.L           | 1.74 | <b>0.00</b> | -0.40 | 0.47        | -0.21 | 0.84        |
| mi Xelaev18013919m.g | Xelaev18013919m.g   | 1.74 | <b>0.00</b> | 0.98  | 0.04        | 0.35  | 0.52        |
| mi Xelaev18003910m.g | Xelaev18003910m.g   | 1.75 | <b>0.00</b> | -1.18 | <b>0.01</b> | 0.25  | 0.55        |
| mi Xelaev18042550m.g | prss16.S            | 1.76 | <b>0.00</b> | -0.90 | 0.04        | -0.73 | 0.09        |
| mi Xelaev18033700m.g | cebpd.S             | 1.76 | <b>0.00</b> | -0.47 | 0.25        | 0.57  | 0.17        |
| mi Xelaev18011870m.g | loc100497109.L      | 1.77 | <b>0.00</b> | -0.70 | 0.18        | 1.48  | 0.01        |
| mi Xelaev18032982m.g | pdk4.S              | 1.77 | <b>0.00</b> | -0.87 | 0.04        | 0.05  | 0.90        |
| mi Xelaev18021413m.g | crebrf-like.S       | 1.77 | <b>0.00</b> | -0.66 | 0.13        | -0.29 | 0.50        |
| mi Xelaev18011016m.g | lmbd2.S             | 1.78 | <b>0.00</b> | -0.23 | 0.72        | -1.16 | 0.02        |
| mi Xelaev18031843m.g | rab31.L             | 1.78 | <b>0.01</b> | 0.02  | 1.00        | -0.18 | 0.80        |
| mi Xelaev18042115m.g | loc100492639-like.S | 1.79 | <b>0.00</b> | -0.96 | 0.03        | -0.11 | 0.82        |
| mi Xelaev18031576m.g | Xelaev18031576m.g   | 1.81 | <b>0.01</b> | -0.62 | 0.25        | -0.54 | 0.35        |
| mi Xelaev18035884m.g | cd163l1.L           | 1.81 | <b>0.01</b> | 0.29  | 0.73        | -0.81 | 0.23        |
| mi Xelaev18035923m.g | tmc4.L              | 1.81 | <b>0.01</b> | -0.25 | 0.70        | 0.33  | 0.60        |
| mi Xelaev18031490m.g | Xelaev18031490m.g   | 1.81 | <b>0.01</b> | 0.69  | 0.34        | 0.24  | 0.80        |

|                      |                   |      |             |       |             |       |             |
|----------------------|-------------------|------|-------------|-------|-------------|-------|-------------|
| mi Xelaev18004020m.g | Xelaev18004020m.g | 1.82 | 0.64        | -0.25 | 1.00        | -6.48 | <b>0.00</b> |
| mi Xelaev18040482m.g | Xelaev18040482m.g | 1.82 | <b>0.00</b> | -0.86 | 0.07        | -0.54 | 0.26        |
| mi Xelaev18001304m.g | Xelaev18001304m.g | 1.82 | <b>0.01</b> | -1.19 | 0.08        | -0.40 | 1.00        |
| mi Xelaev18046859m.g | cacng4.S          | 1.83 | <b>0.01</b> | -0.94 | 0.12        | -0.92 | 0.13        |
| mi Xelaev18000330m.g | Xelaev18000330m.g | 1.83 | <b>0.00</b> | -0.66 | 0.13        | -0.01 | 0.98        |
| mi Xelaev18025760m.g | mst1.S            | 1.84 | <b>0.00</b> | -0.31 | 0.48        | 1.27  | <b>0.00</b> |
| mi Xelaev18029453m.g | Xelaev18029453m.g | 1.84 | 0.03        | 2.31  | <b>0.01</b> | -0.91 | 0.21        |
| mi Xelaev18031280m.g | aoah.L            | 1.84 | <b>0.00</b> | -0.78 | 0.10        | -0.36 | 0.43        |
| mi Xelaev18011456m.g | Xelaev18011456m.g | 1.85 | <b>0.00</b> | -1.33 | 0.03        | -1.87 | <b>0.00</b> |
| mi Xelaev18029940m.g | rbp2.S            | 1.86 | 0.03        | -3.41 | <b>0.01</b> | 0.31  | 0.72        |
| mi Xelaev18022529m.g | Xelaev18022529m.g | 1.88 | <b>0.00</b> | -0.39 | 0.35        | -0.57 | 0.17        |
| mi Xelaev18028378m.g | scara3.L          | 1.88 | <b>0.00</b> | -0.38 | 0.38        | 0.05  | 0.91        |
| mi Xelaev18036272m.g | Xelaev18036272m.g | 1.89 | <b>0.00</b> | -0.08 | 0.88        | -0.96 | 0.06        |
| mi Xelaev18025422m.g | clca3p-like.S     | 1.89 | <b>0.00</b> | 0.98  | 0.03        | 0.54  | 0.26        |
| mi Xelaev18037808m.g | Xelaev18037808m.g | 1.89 | 0.04        | -1.36 | 0.27        | -2.61 | <b>0.00</b> |
| mi Xelaev18014604m.g | loc100494383.S    | 1.89 | <b>0.00</b> | 0.29  | 0.66        | -0.30 | 0.58        |
| mi Xelaev18047126m.g | cd302.S           | 1.90 | <b>0.00</b> | -0.13 | 0.82        | 0.25  | 0.69        |
| mi Xelaev18046185m.g | nfatc2.S          | 1.90 | <b>0.00</b> | -0.54 | 0.28        | 0.70  | 0.15        |
| mi Xelaev18047606m.g | Xelaev18047606m.g | 1.91 | <b>0.01</b> | 1.25  | 0.02        | -0.20 | 0.78        |
| mi Xelaev18043069m.g | loc101732252.L    | 1.91 | <b>0.01</b> | 0.93  | 0.26        | 0.33  | 1.00        |
| mi Xelaev18036024m.g | apoe.L            | 1.91 | <b>0.00</b> | -1.13 | <b>0.01</b> | -1.39 | <b>0.00</b> |
| mi Xelaev18035274m.g | Xelaev18035274m.g | 1.92 | <b>0.00</b> | -0.39 | 0.43        | 0.35  | 0.48        |
| mi Xelaev18002752m.g | rnf182.S          | 1.93 | <b>0.01</b> | -0.67 | 0.35        | -1.08 | 0.10        |
| mi Xelaev18046048m.g | slc4a1.S          | 1.93 | <b>0.00</b> | -0.45 | 0.37        | -0.18 | 0.81        |
| mi Xelaev18014838m.g | mybph.S           | 1.94 | <b>0.00</b> | 0.12  | 0.90        | -0.83 | 0.22        |
| mi Xelaev18031989m.g | cebpd.L           | 1.95 | <b>0.00</b> | -0.59 | 0.15        | 0.77  | 0.06        |
| mi Xelaev18039459m.g | fos.L             | 1.95 | <b>0.00</b> | 0.67  | 0.23        | -1.30 | <b>0.00</b> |
| mi Xelaev18010102m.g | Xelaev18010102m.g | 1.96 | <b>0.00</b> | -0.56 | 0.33        | 0.03  | 1.00        |
| mi Xelaev18044446m.g | Xelaev18044446m.g | 1.98 | <b>0.00</b> | -0.95 | 0.08        | -1.39 | 0.02        |
| mi Xelaev18039005m.g | loc100127779.L    | 1.98 | <b>0.00</b> | -0.67 | 0.11        | -0.31 | 0.46        |
| mi Xelaev18002404m.g | Xelaev18002404m.g | 1.99 | <b>0.00</b> | -1.26 | 0.04        | -0.18 | 0.85        |
| mi Xelaev18036829m.g | htra1.S           | 1.99 | <b>0.00</b> | 1.33  | <b>0.00</b> | 0.91  | 0.03        |
| mi Xelaev18035813m.g | Xelaev18035813m.g | 2.01 | <b>0.00</b> | 0.39  | 0.73        | -0.20 | 0.76        |
| mi Xelaev18004158m.g | Xelaev18004158m.g | 2.02 | <b>0.00</b> | -0.74 | 0.11        | -0.69 | 0.11        |
| mi Xelaev18025526m.g | Xelaev18025526m.g | 2.02 | <b>0.00</b> | 0.16  | 0.84        | -0.10 | 1.00        |
| mi Xelaev18038264m.g | Xelaev18038264m.g | 2.03 | <b>0.00</b> | -0.58 | 0.16        | -0.19 | 0.65        |
| mi Xelaev18045569m.g | rasd1.L           | 2.03 | <b>0.00</b> | -0.32 | 0.49        | -0.20 | 0.67        |
| mi Xelaev18010391m.g | selplg.S          | 2.03 | <b>0.00</b> | -0.65 | 0.29        | 0.08  | 0.91        |
| mi Xelaev18045021m.g | mstn.1.L          | 2.03 | <b>0.00</b> | 0.37  | 0.75        | 1.62  | 0.19        |
| mi Xelaev18005146m.g | cd38.L            | 2.05 | <b>0.00</b> | -0.48 | 0.26        | 0.25  | 0.56        |
| mi Xelaev18021265m.g | ptprq.S           | 2.08 | <b>0.00</b> | -0.35 | 0.55        | -0.78 | 0.14        |
| mi Xelaev18034760m.g | ankrd1.L          | 2.10 | <b>0.00</b> | 0.43  | 0.61        | 0.14  | 0.91        |
| mi Xelaev18036353m.g | Xelaev18036353m.g | 2.10 | <b>0.00</b> | -0.68 | 0.17        | 0.26  | 0.61        |

|                      |                     |      |             |       |             |       |             |
|----------------------|---------------------|------|-------------|-------|-------------|-------|-------------|
| mi Xelaev18032917m.g | Xelaev18032917m.g   | 2.10 | <b>0.01</b> | 4.82  | 0.26        | 0.57  | 0.78        |
| mi Xelaev18018360m.g | rlbp1.L             | 2.14 | <b>0.00</b> | -0.55 | 0.29        | 0.72  | 0.19        |
| mi Xelaev18041485m.g | Xelaev18041485m.g   | 2.14 | <b>0.00</b> | -0.64 | 0.12        | -0.19 | 0.65        |
| mi Xelaev18030844m.g | loc100145516.L      | 2.15 | <b>0.00</b> | 0.73  | 0.32        | 1.70  | 0.02        |
| mi Xelaev18020261m.g | loc100496891.S      | 2.16 | <b>0.00</b> | -0.62 | 0.29        | -0.76 | 0.17        |
| mi Xelaev18037324m.g | adamts15.S          | 2.18 | <b>0.00</b> | -0.10 | 0.92        | 0.40  | 0.62        |
| mi Xelaev18010923m.g | cmys5.S             | 2.18 | <b>0.00</b> | -0.16 | 0.84        | -0.05 | 0.95        |
| mi Xelaev18038973m.g | il13ra2.L           | 2.19 | <b>0.00</b> | -1.27 | 0.04        | 0.52  | 0.64        |
| mi Xelaev18045355m.g | pdilt.L             | 2.20 | <b>0.00</b> | -0.65 | 0.25        | 0.37  | 0.46        |
| mi Xelaev18013909m.g | loc100490389-like.L | 2.20 | 0.14        | -3.41 | <b>0.01</b> | 0.08  | 1.00        |
| mi Xelaev18002953m.g | Xelaev18002953m.g   | 2.20 | 0.14        | 1.96  | 0.14        | 3.50  | <b>0.01</b> |
| mi Xelaev18008062m.g | rfesd.L             | 2.22 | <b>0.00</b> | -0.54 | 0.21        | 0.06  | 0.89        |
| mi Xelaev18025007m.g | loc100497464.S      | 2.22 | <b>0.00</b> | 1.13  | 0.07        | 0.61  | 0.31        |
| mi Xelaev18009050m.g | lrrc66.S            | 2.24 | <b>0.00</b> | 0.59  | 0.24        | -0.02 | 1.00        |
| mi Xelaev18012630m.g | Xelaev18012630m.g   | 2.25 | <b>0.00</b> | 1.12  | 0.04        | 0.49  | 0.53        |
| mi Xelaev18030326m.g | Xelaev18030326m.g   | 2.25 | <b>0.01</b> | 0.92  | 0.18        | 0.25  | 0.90        |
| mi Xelaev18036286m.g | loc100488841.L      | 2.26 | <b>0.00</b> | -0.60 | 0.31        | 0.28  | 0.88        |
| mi Xelaev18027313m.g | loc100487665-like.L | 2.26 | <b>0.00</b> | 0.14  | 0.78        | -0.06 | 0.90        |
| mi Xelaev18003389m.g | atp2a1.L            | 2.26 | <b>0.00</b> | 1.88  | <b>0.00</b> | 1.09  | 0.05        |
| mi Xelaev18009358m.g | loc100493381.S      | 2.27 | <b>0.00</b> | 1.27  | 0.06        | -0.96 | 0.13        |
| mi Xelaev18000853m.g | serpine1.S          | 2.29 | <b>0.00</b> | 0.14  | 0.92        | 0.45  | 0.73        |
| mi Xelaev18045310m.g | loc100170419.L      | 2.31 | 0.25        | 2.08  | <b>0.00</b> | 0.38  | 0.77        |
| mi Xelaev18000041m.g | Xelaev18000041m.g   | 2.32 | <b>0.00</b> | 0.69  | 0.62        | 0.40  | 0.84        |
| mi Xelaev18009995m.g | Xelaev18009995m.g   | 2.33 | <b>0.00</b> | -1.05 | 0.01        | 0.01  | 0.98        |
| mi Xelaev18017497m.g | amdhd1.L            | 2.33 | <b>0.00</b> | -0.51 | 0.31        | 1.74  | <b>0.00</b> |
| mi Xelaev18031194m.g | inhba.L             | 2.34 | <b>0.00</b> | 0.92  | 0.18        | -0.24 | 0.84        |
| mi Xelaev18030932m.g | gpnmb.L             | 2.36 | <b>0.00</b> | -0.11 | 0.80        | -0.98 | 0.02        |
| mi Xelaev18004278m.g | Xelaev18004278m.g   | 2.36 | <b>0.00</b> | -0.38 | 1.00        | -0.69 | 0.44        |
| mi Xelaev18012471m.g | htr1d.L             | 2.36 | <b>0.00</b> | -0.48 | 0.56        | -1.28 | 0.05        |
| mi Xelaev18017011m.g | loc101734840.L      | 2.36 | <b>0.00</b> | 3.56  | <b>0.01</b> | -0.53 | 0.46        |
| mi Xelaev18016518m.g | Xelaev18016518m.g   | 2.40 | <b>0.00</b> | 0.33  | 0.61        | 0.45  | 0.43        |
| mi Xelaev18030843m.g | steap4.L            | 2.42 | <b>0.00</b> | 0.26  | 0.58        | 0.34  | 0.47        |
| mi Xelaev18042591m.g | unnamed.S           | 2.43 | <b>0.01</b> | 0.26  | 0.87        | -0.46 | 0.49        |
| mi Xelaev18038926m.g | tmem182-like.2.L    | 2.44 | <b>0.00</b> | -0.56 | 0.47        | -0.50 | 0.47        |
| mi Xelaev18034150m.g | slc39a4.S           | 2.45 | <b>0.00</b> | 1.11  | <b>0.01</b> | 0.10  | 0.82        |
| mi Xelaev18027311m.g | Xelaev18027311m.g   | 2.45 | <b>0.00</b> | -0.03 | 0.95        | 0.26  | 0.58        |
| mi Xelaev18003789m.g | Xelaev18003789m.g   | 2.45 | <b>0.00</b> | -0.81 | 0.07        | 0.16  | 0.70        |
| mi Xelaev18024125m.g | Xelaev18024125m.g   | 2.51 | <b>0.00</b> | -0.97 | 0.27        | 0.27  | 1.00        |
| mi Xelaev18024546m.g | adm.S               | 2.52 | <b>0.00</b> | 0.02  | 1.00        | -0.26 | 0.79        |
| mi Xelaev18004252m.g | Xelaev18004252m.g   | 2.53 | <b>0.00</b> | 0.79  | 0.07        | 0.93  | 0.05        |
| mi Xelaev18003557m.g | Xelaev18003557m.g   | 2.53 | <b>0.01</b> | 1.37  | 0.10        | 0.96  | 0.35        |
| mi Xelaev18034942m.g | ldb3-like.1.L       | 2.54 | <b>0.00</b> | -0.53 | 0.35        | -0.65 | 0.28        |
| mi Xelaev18018897m.g | loc100489110.L      | 2.57 | <b>0.00</b> | 0.60  | 0.27        | 0.63  | 0.20        |



|                      |                   |      |             |       |             |       |             |
|----------------------|-------------------|------|-------------|-------|-------------|-------|-------------|
| mi Xelaev18020464m.g | Xelaev18020464m.g | 2.57 | <b>0.00</b> | -0.77 | 0.59        | -0.18 | 0.86        |
| mi Xelaev18010995m.g | oxct1.S           | 2.60 | <b>0.00</b> | -1.17 | 0.39        | -2.68 | <b>0.00</b> |
| mi Xelaev18034736m.g | rbp4.L            | 2.61 | <b>0.00</b> | -1.02 | 0.02        | -0.19 | 0.67        |
| mi Xelaev18039176m.g | cfb.L             | 2.62 | <b>0.00</b> | 0.46  | 0.27        | 1.58  | <b>0.00</b> |
| mi Xelaev18029882m.g | Xelaev18029882m.g | 2.63 | 0.15        | -3.48 | <b>0.00</b> | -1.10 | 0.16        |
| mi Xelaev18043321m.g | mylk.L            | 2.63 | 0.15        | -3.41 | <b>0.01</b> | 0.08  | 1.00        |
| mi Xelaev18041128m.g | dhrs7.S           | 2.63 | 0.15        | 0.69  | 0.62        | -1.91 | <b>0.00</b> |
| mi Xelaev18019918m.g | ano2.S            | 2.63 | <b>0.01</b> | 1.00  | 0.44        | -0.06 | 1.00        |
| mi Xelaev18022081m.g | Xelaev18022081m.g | 2.63 | <b>0.01</b> | 1.40  | 0.27        | -0.07 | 1.00        |
| mi Xelaev18009049m.g | Xelaev18009049m.g | 2.64 | <b>0.00</b> | 0.95  | 0.11        | 0.15  | 0.82        |
| mi Xelaev18005354m.g | slc25a4.L         | 2.64 | <b>0.00</b> | 0.95  | 0.21        | -1.20 | 0.11        |
| mi Xelaev18014352m.g | fam3b.S           | 2.66 | <b>0.00</b> | 0.35  | 0.46        | -0.91 | 0.05        |
| mi Xelaev18037722m.g | xa-1-like.S       | 2.67 | <b>0.00</b> | 0.21  | 1.00        | 1.06  | 0.37        |
| mi Xelaev18026176m.g | Xelaev18026176m.g | 2.70 | <b>0.00</b> | 0.16  | 0.90        | -0.21 | 0.80        |
| mi Xelaev18014488m.g | mab21l3.S         | 2.71 | <b>0.00</b> | -1.14 | 0.06        | 1.91  | <b>0.00</b> |
| mi Xelaev18039339m.g | olfm4.L           | 2.73 | <b>0.00</b> | 1.34  | <b>0.00</b> | 1.16  | <b>0.01</b> |
| mi Xelaev18025859m.g | irak2.S           | 2.77 | <b>0.00</b> | -2.83 | 0.06        | 0.63  | 1.00        |
| mi Xelaev18009501m.g | Xelaev18009501m.g | 2.78 | <b>0.00</b> | 0.31  | 0.64        | 0.59  | 0.31        |
| mi Xelaev18036931m.g | Xelaev18036931m.g | 2.84 | <b>0.01</b> | -5.90 | 0.02        | -1.63 | 0.04        |
| mi Xelaev18007437m.g | MGC75582.L        | 2.84 | <b>0.01</b> | 0.64  | 0.47        | -1.13 | 0.18        |
| mi Xelaev18026247m.g | marc1-like.L      | 2.84 | <b>0.01</b> | -0.30 | 0.84        | 0.65  | 0.65        |
| mi Xelaev18041860m.g | lhx6.S            | 2.86 | <b>0.00</b> | -0.76 | 0.28        | 0.65  | 0.42        |
| mi Xelaev18019129m.g | c3.L              | 2.93 | <b>0.00</b> | 0.84  | 0.04        | 2.40  | <b>0.00</b> |
| mi Xelaev18027022m.g | Xelaev18027022m.g | 2.97 | <b>0.00</b> | -0.94 | 0.70        | 0.08  | 1.00        |
| mi Xelaev18041151m.g | gpr132.S          | 2.97 | <b>0.00</b> | -0.15 | 0.90        | 0.26  | 0.89        |
| mi Xelaev18009500m.g | cxcl8.S           | 2.97 | <b>0.00</b> | 2.87  | 0.06        | 0.87  | 0.59        |
| mi Xelaev18043989m.g | Xelaev18043989m.g | 2.99 | <b>0.01</b> | -4.34 | 0.51        | -0.39 | 1.00        |
| mi Xelaev18008772m.g | cyp26b1.S         | 3.19 | <b>0.00</b> | -0.34 | 0.83        | -0.63 | 0.38        |
| mi Xelaev18021416m.g | stc2.S            | 3.19 | <b>0.00</b> | -0.29 | 1.00        | -0.63 | 0.38        |
| mi Xelaev18011936m.g | cideb.L           | 3.27 | <b>0.00</b> | 0.00  | 1.00        | 0.63  | 1.00        |
| mi Xelaev18006826m.g | rflb.L            | 3.29 | 0.03        | 3.03  | <b>0.00</b> | 0.08  | 1.00        |
| mi Xelaev18043836m.g | g6pc-like.1.L     | 3.32 | <b>0.00</b> | -1.59 | <b>0.00</b> | 0.29  | 0.50        |
| mi Xelaev18035519m.g | Xelaev18035519m.g | 3.33 | <b>0.00</b> | 6.35  | <b>0.00</b> | 0.00  | 1.00        |
| mi Xelaev18009504m.g | Xelaev18009504m.g | 3.36 | <b>0.00</b> | 1.41  | 0.03        | 0.20  | 1.00        |
| mi Xelaev18034628m.g | col17a1.L         | 3.38 | <b>0.00</b> | 1.17  | 0.04        | -0.75 | 0.27        |
| mi Xelaev18013488m.g | loc496972.L       | 3.40 | 1.00        | -2.93 | <b>0.00</b> | -0.76 | 0.29        |
| mi Xelaev18007073m.g | ighx.L            | 3.40 | 1.00        | -6.01 | 0.01        | -6.56 | <b>0.00</b> |
| mi Xelaev18046507m.g | g6pc-like.1.S     | 3.47 | <b>0.00</b> | -1.99 | <b>0.00</b> | 0.05  | 1.00        |
| mi Xelaev18038397m.g | c9orf9.L          | 3.55 | <b>0.00</b> | 0.02  | 1.00        | 2.01  | 0.14        |
| mi Xelaev18002519m.g | Xelaev18002519m.g | 3.65 | <b>0.00</b> | -0.54 | 0.65        | 0.96  | 0.30        |
| mi Xelaev18001530m.g | prss53.L          | 3.70 | <b>0.00</b> | -1.53 | 0.19        | -1.98 | 0.02        |
| mi Xelaev18046620m.g | Xelaev18046620m.g | 3.75 | <b>0.01</b> | -0.50 | 0.60        | 0.53  | 0.70        |
| mi Xelaev18009482m.g | loc100271753.S    | 3.85 | <b>0.00</b> | 2.15  | <b>0.00</b> | 0.80  | 0.09        |

|                      |                   |      |             |       |             |       |             |
|----------------------|-------------------|------|-------------|-------|-------------|-------|-------------|
| mi Xelaev18016263m.g | mmp1.S            | 3.95 | <b>0.00</b> | 3.18  | <b>0.00</b> | 1.00  | 0.24        |
| mi Xelaev18028931m.g | loc100490133.S    | 3.99 | <b>0.00</b> | -1.41 | 0.17        | 4.68  | 0.26        |
| mi Xelaev18034823m.g | Xelaev18034823m.g | 4.09 | <b>0.00</b> | 2.31  | <b>0.01</b> | -0.55 | 0.49        |
| mi Xelaev18013990m.g | hpx.L             | 4.18 | <b>0.00</b> | 4.26  | <b>0.00</b> | 5.65  | 0.04        |
| mi Xelaev18043858m.g | loc100494738.L    | 4.19 | <b>0.00</b> | 1.77  | <b>0.00</b> | 0.49  | 0.82        |
| mi Xelaev18013829m.g | mmp13l.L          | 4.26 | <b>0.00</b> | 2.03  | <b>0.00</b> | 1.80  | <b>0.00</b> |
| mi Xelaev18045368m.g | Xelaev18045368m.g | 4.28 | <b>0.00</b> | 5.10  | <b>0.00</b> | 2.26  | 0.25        |
| mi Xelaev18013823m.g | mmp8.L            | 4.39 | <b>0.00</b> | 4.52  | <b>0.00</b> | 0.55  | 0.80        |
| mi Xelaev18032949m.g | loc100145516.S    | 4.40 | <b>0.00</b> | 0.02  | 1.00        | 2.04  | 0.03        |
| mi Xelaev18036097m.g | loc100489674.L    | 4.80 | <b>0.00</b> | 0.94  | 1.00        | 0.07  | 1.00        |
| mi Xelaev18027359m.g | loc100497103.L    | 4.89 | 0.26        | -1.36 | 0.27        | -3.30 | <b>0.00</b> |
| mi Xelaev18021463m.g | Xelaev18021463m.g | 5.29 | 0.08        | -3.41 | <b>0.01</b> | -0.33 | 0.82        |
| mi Xelaev18018930m.g | loc100489908.L    | 5.33 | 0.08        | -5.47 | 0.08        | -6.52 | <b>0.00</b> |
| mi Xelaev18037094m.g | pla2g12b.S        | 5.35 | 0.08        | 6.40  | <b>0.00</b> | -1.23 | 0.09        |
| mi Xelaev18011861m.g | loc100496785.L    | 6.27 | <b>0.01</b> | 0.02  | 1.00        | 0.08  | 1.00        |
| mi Xelaev18016883m.g | Xelaev18016883m.g | 6.44 | <b>0.00</b> | -5.60 | 0.04        | -0.43 | 0.68        |
| mi Xelaev18005827m.g | cxcl8.L           | 6.44 | <b>0.00</b> | 1.66  | 0.05        | 1.24  | 0.15        |
| mi Xelaev18043108m.g | krt17.L           | 6.44 | <b>0.00</b> | 3.18  | 1.00        | 0.07  | 1.00        |
| mi Xelaev18010739m.g | gramd3.S          | 6.59 | <b>0.00</b> | 0.60  | 0.57        | -0.27 | 0.75        |
| mi Xelaev18006861m.g | Xelaev18006861m.g | 6.85 | <b>0.00</b> | 3.18  | 1.00        | -0.71 | 0.59        |

1

2

3

4

5

6

7

8

9

10

11

12

13

**Supplementary Table S8 - Antibodies**

| Target             | #Cat                 | WB      | IFI    | Methanol (IFI) |
|--------------------|----------------------|---------|--------|----------------|
| p-S6 (S235/236)    | Cell-Signaling 2211  | 1:1000  | 1:200  | Yes            |
| S6                 | Cell-Signaling 2217  | 1:1000  | 1:200  |                |
| p-4E-BP1 (T37/46)  | Cell-Signaling 2855  | 1:1000  | 1:100  | Yes            |
| 4E-BP1             | Cell-Signaling 9644  | 1:1000  | 1:100  |                |
| SOX2               | Cell-Signaling 4900S | 1:1000  | 1:200  |                |
| PCNA               | Sigma-Aldrich P8825  |         | 1:100  |                |
| Neurofilament-200  | Sigma-Aldrich N4142  |         | 1:1000 |                |
| $\alpha$ -Tubulina | Abcam ab7291         | 1:10000 |        |                |
| Alexa 488          | Invitrogen A11001    |         | 1:500  |                |
| Alexa 555          | Invitrogen A21422    |         | 1:500  |                |
| Alexa 635          | Invitrogen A31577    |         | 1:500  |                |
| IgG-Mouse, HRP     | Invitrogen 32430     | 1:2000  |        |                |
| IgG-Rabbit, HRP    | Invitrogen 31460     | 1:2000  |        |                |

1

## Uncropped images of blots included in main figures

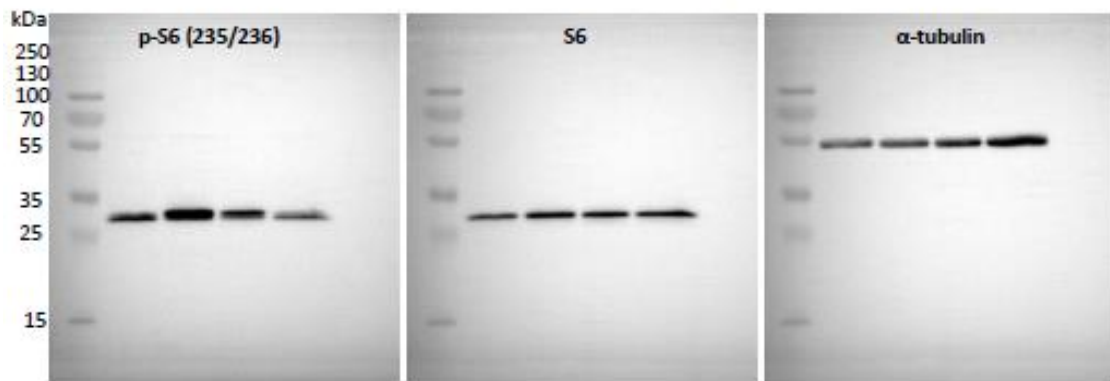

The images correspond to the western blot included in figure 4f.

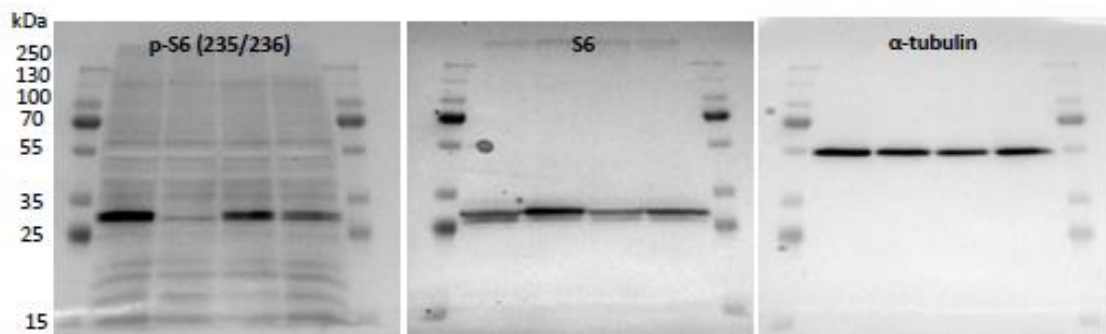

The images correspond to the western blot included in figure 5b.

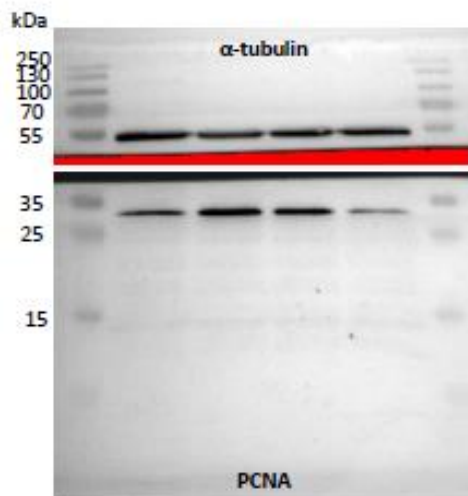

Both images are part of a unique membrane divided in two, each section of the membrane was incubated with different antibodies, as specified. These images correspond to the western blot included in figure 7q.

- 1
- 2
- 3

Uncropped images of blots included in supplementary information

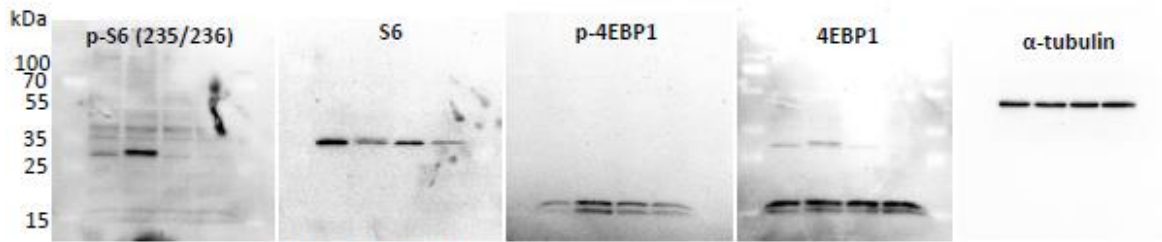

The images correspond to the western blot included in figure S3b.

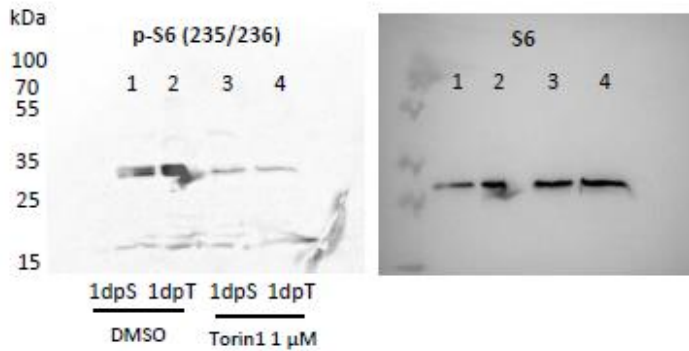

Lanes 1 and 3 correspond to sham animals, and are the ones included in figure S3e.

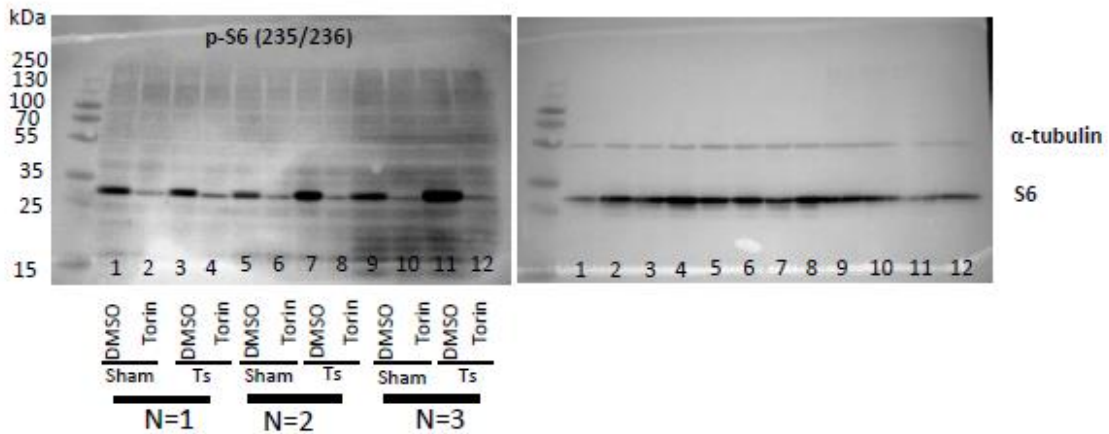

Lanes 7 and 8 included in figure S4b. The figure includes three independent experiments (N=1, 2 and 3).
